# Supplementary material for: MEST promotes lung cancer invasion and metastasis by interacting with VCP to activate NF-κB signaling
Source: Springer Nature journal article supplement (doi:10.1186/s13046-021-02107-1), 2021-09-24
Supplement: MOESM1 [file 19723440]

1 **MEST Promotes Lung Cancer Invasion and Metastasis by**

2 **Interacting with VCP to Activate NF- $\kappa$ B Signaling**

3

4 Yang Wang<sup>1</sup>, Jing Zhang<sup>1</sup>, Yang-Jia Li<sup>1</sup>, Nan-Nan Yu<sup>1</sup>, Wan-Ting Liu<sup>1</sup>, Jun-Ze Liang<sup>1</sup>,  
5 Wen-Wen Xu<sup>2</sup>, Zheng-Hua Sun<sup>1</sup>, Bin Li<sup>\* 1</sup>, Qing-Yu He<sup>\* 1</sup>

6

7 <sup>1</sup>MOE Key Laboratory of Tumor Molecular Biology and Key Laboratory of  
8 Functional Protein Research of Guangdong Higher Education Institutes, Institute of  
9 Life and Health Engineering, Jinan University, Guangzhou 510632, China; <sup>2</sup>MOE  
10 Key Laboratory of Tumor Molecular Biology and Guangdong Provincial Key  
11 Laboratory of Bioengineering Medicine, National Engineering Research Center of  
12 Genetic Medicine, Institute of Biomedicine, Jinan University, Guangzhou 510632,  
13 China.

14

15

16 **Supplementary Materials**

17

18

19 **Supplementary Figure S1.**

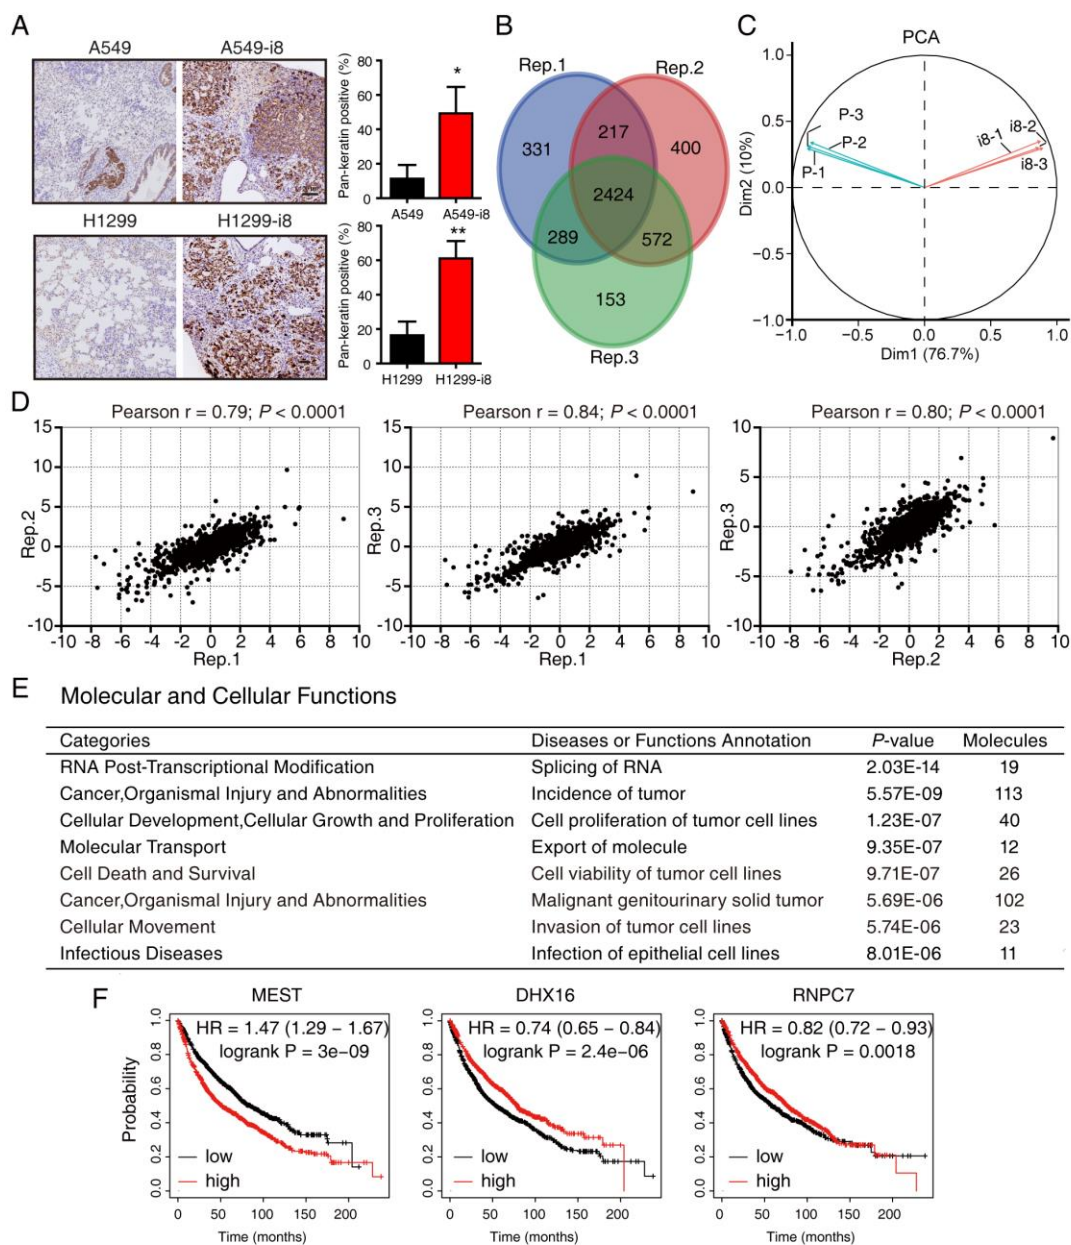

Figure S1

20

21 **Figure S1. IPA analysis of the differentially expressed proteins in A549-i8.** (A)  
 22 NCG mice were transplanted with A549-i8 cells or H1299-i8 cells, or their  
 23 corresponding parental cells *via* tail vein injection, lungs harvested after imaging were  
 24 histologically analyzed by pan-keratin staining, and the cytokeratin-positive cells  
 25 were quantified. Scale bar, 100  $\mu$ m. Bars, SD. \*,  $P < 0.05$ ; \*\*,  $P < 0.01$  compared  
 26 with control group unless otherwise indicated. (B) Venn diagram of the protein  
 27 numbers identified in three independent SILAC experiments. (C) Principal component

28 analysis (PCA) of A549 parental and A549-i8 in three independent experiments. Dim  
29 1 and Dim 2: principal component 1 and principal component 2. Red lines (i8) and  
30 blue lines (parental) represent 3 biological replicates, respectively. (D) Correlation  
31 between independent biological replicates. Pearson correlation coefficients ( $r$ ) and  
32 their  $P$  values were shown as indicated. (E) The differentially expressed proteins in  
33 A549-i8 were uploaded to IPA analysis, showing that the top five molecular and  
34 cellular functions were relevant to cell development, cell growth, cell movement and  
35 cell survival. (F) The expressions of MEST, DHX16 and RNPC7 in lung cancer  
36 versus the survival of patients were plotted using Kaplan-Meier plotter software.  
37

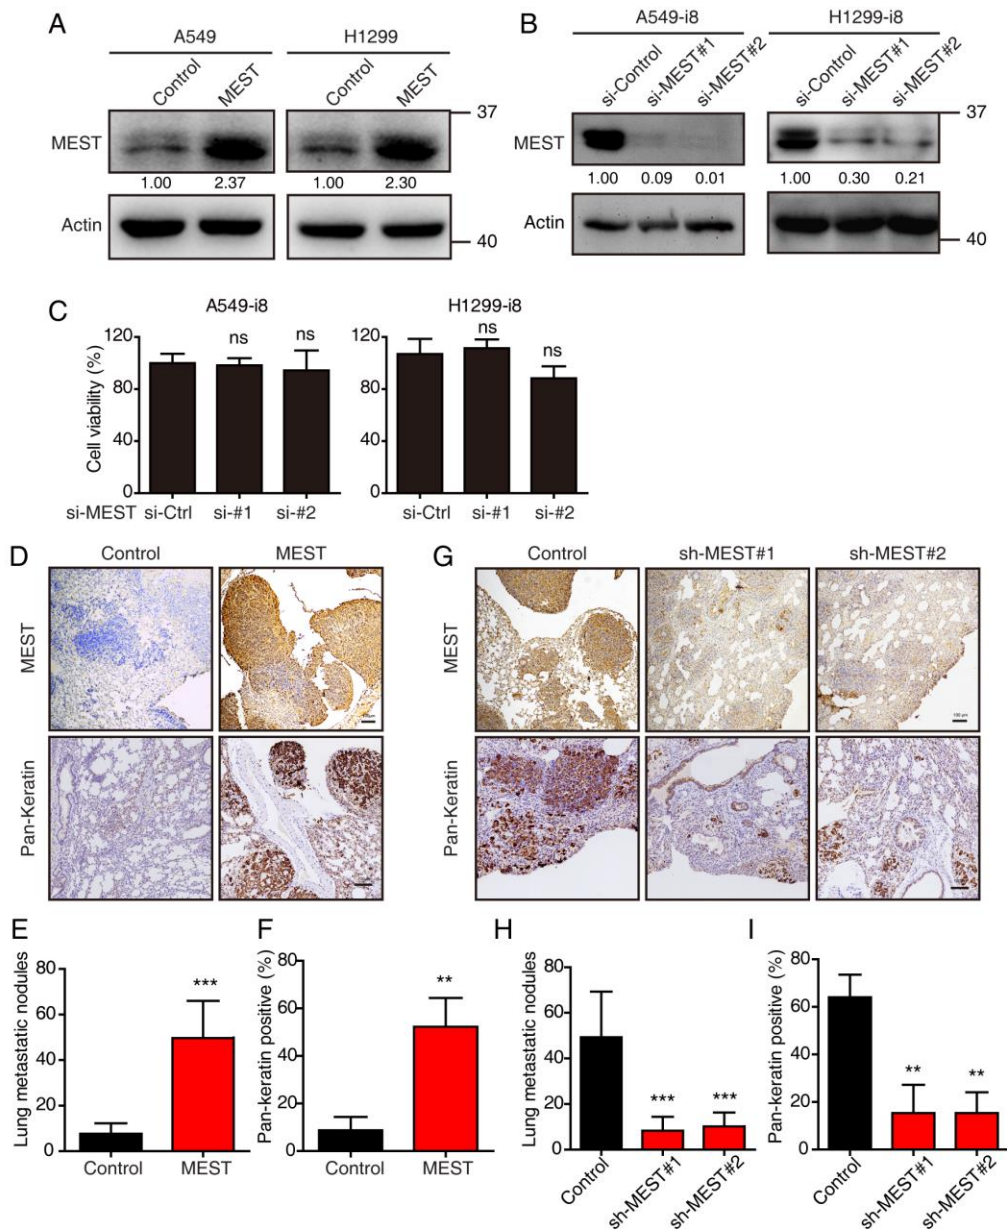

Figure S2

**Figure S2. The overexpression and knockdown effects of MEST in lung cancer cells.** (A, B) A549 and H1299 cells were overexpressed with MEST, while A549-i8 and H1299-i8 cells were transfected with two anti-MEST siRNA (si-MEST#1 and si-MEST#2), and the overexpression and knockdown effects were detected by western blot analysis. (C) Knockdown of MEST do not influence cell viability. A549-i8 and H1299-i8 were transfected with two anti-MEST siRNA (100 nM) or control siRNA for 48 h, and the cell viability was detected by WST-1. NS, no

47 significant difference, as compared to control group. (D-F) Nude mice were  
48 transplanted with the luciferase-labeled cells with or without MEST overexpression  
49 *via* tail vein injection, the lungs of mice were harvested 1 month post-transplantation.  
50 The expression of MEST and **pan-keratin** on pulmonary metastases in the mouse  
51 model was histologically analyzed by IHC staining (D). **Lungs from mice injected**  
52 **with MEST-overexpressing cells showed significantly more incidence of lung**  
53 **metastasis, as evidenced by the increase of lung metastatic nodules (E) and**  
54 **pan-keratin positive ratio (F).** (G-I) NCG mice were transplanted with the  
55 luciferase-labeled cells expressing two shRNA against MEST *via* tail vein injection;  
56 the mice were visualized 1.5 months post-transplantation using the IVIS 200 Imaging  
57 System. The expression of MEST and **pan-keratin** in metastatic nodes in the mouse  
58 model was histologically analyzed by IHC staining (G). **Lungs from mice injected**  
59 **with MEST knockdown cells showed significantly reduced incidence of lung**  
60 **metastasis, as evidenced by the decrease of lung metastatic nodules (H) and**  
61 **pan-keratin positive ratio (I).** Bars, SD. \*\*\*,  $P < 0.001$  compared with control group  
62 unless otherwise indicated. Scale bar, 100  $\mu\text{m}$ .

63

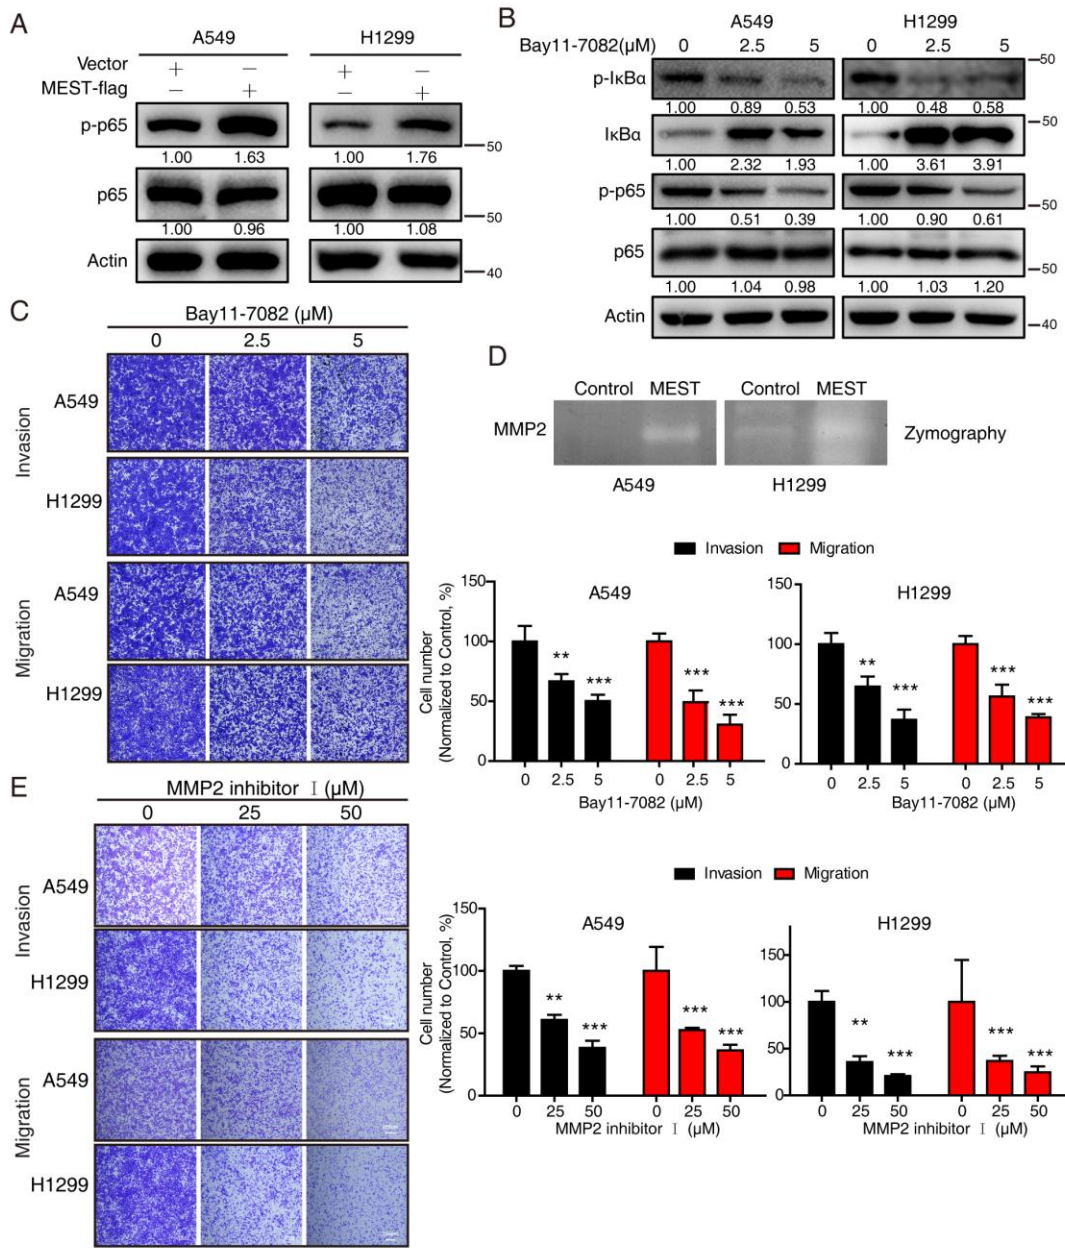

Figure S3

65

66 **Figure S3. Inhibitory effect of NF-κB inhibitor Bay11-7082 on NF-κB signaling,**  
 67 **cell invasion and migration.** (A) MEST overexpression promotes the

68 phosphorylation of NF-κB subunits (p65) in both A549 and H1299 cells. (B) A549  
 69 and H1299 were treated with 2.5 and 5 μM of Bay11-7082 for 24 h, and the cell  
 70 lysates were subjected to western blot analysis for the detection of p-IκBα, IκBα,  
 71 p-p65 and p65, and the cell invasion and migration were detected by transwell assays

72 (C). (D) Ectopic MEST expression induces enzymatic activities of MMP-2 in both

73 cell lines, as determined by zymography assay. (E) A549 and H1299 were treated with  
74 25 and 50  $\mu\text{M}$  of MMP2 inhibitor I for 24 h, and the cell invasion and migration were  
75 detected by transwell assays. Bars, SD. \*\*,  $P < 0.01$ ; \*\*\*,  $P < 0.001$  compared with  
76 control group unless otherwise indicated. Scale Bar, 250  $\mu\text{m}$ .

77

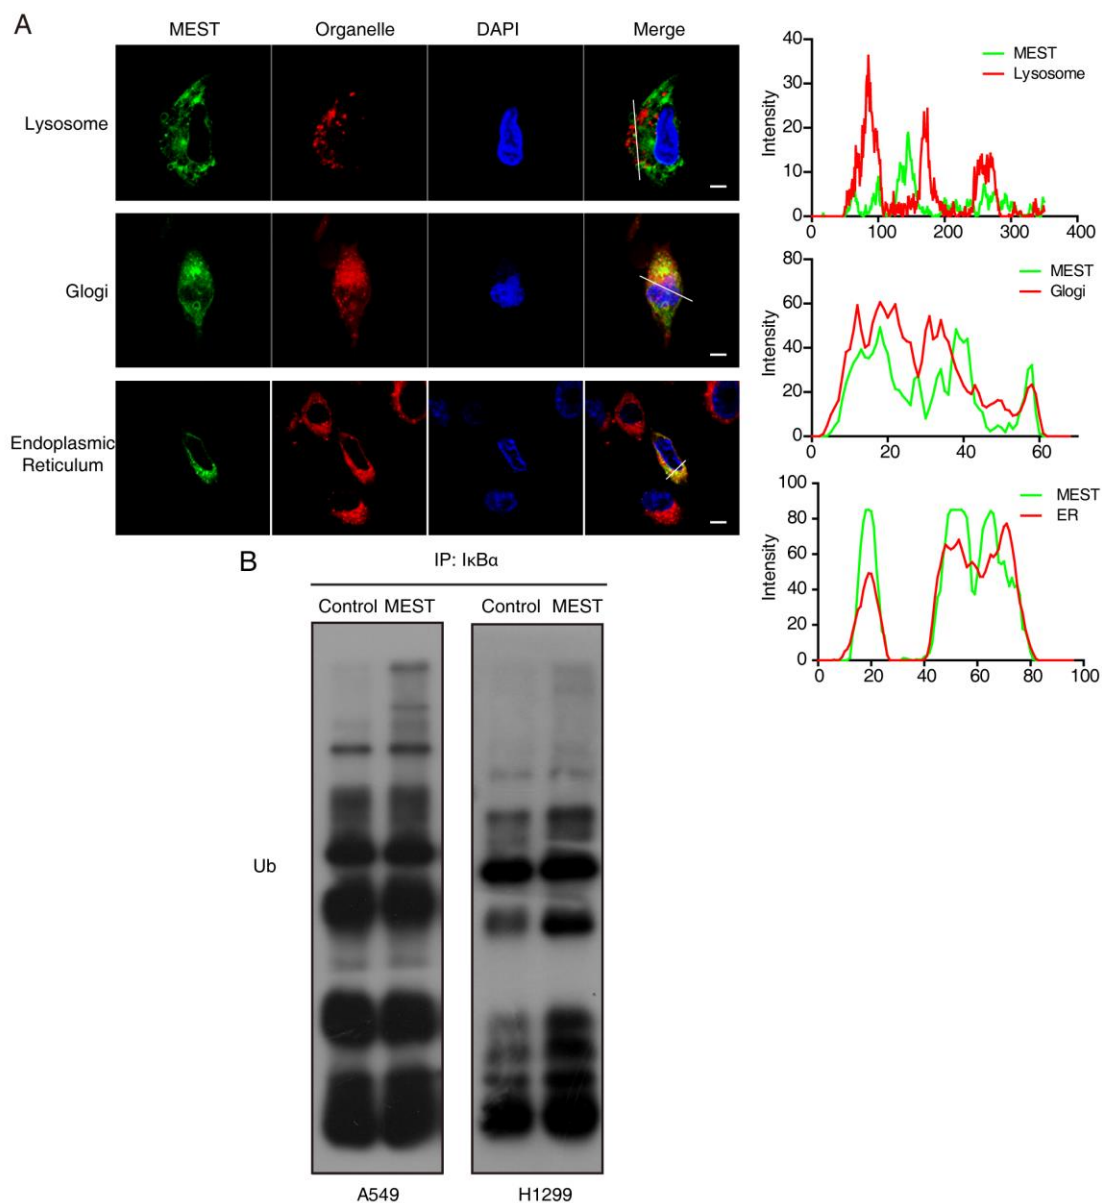

Figure S4

79

80 **Figure S4. Cellular localization of MEST.** (A) A549 cells transfected with  
 81 MEST-eGFP plasmid for 24 h were stained with lysosome tracker, Golgi tracker and  
 82 Endoplasmic Reticulum tracker, respectively, and imaged by confocal microscope.  
 83 Scale Bar, 5  $\mu$ m. The intensity profiles of MEST and lysosome/Golgi/ER along the  
 84 white line are plotted in right panels. (B) A549 and H1299 transfected with vector or  
 85 MEST-flag plasmids for 24 h, the ubiquitination of I $\kappa$ B $\alpha$  was determined by co-IP  
 86 assay using anti-I $\kappa$ B $\alpha$  antibody.



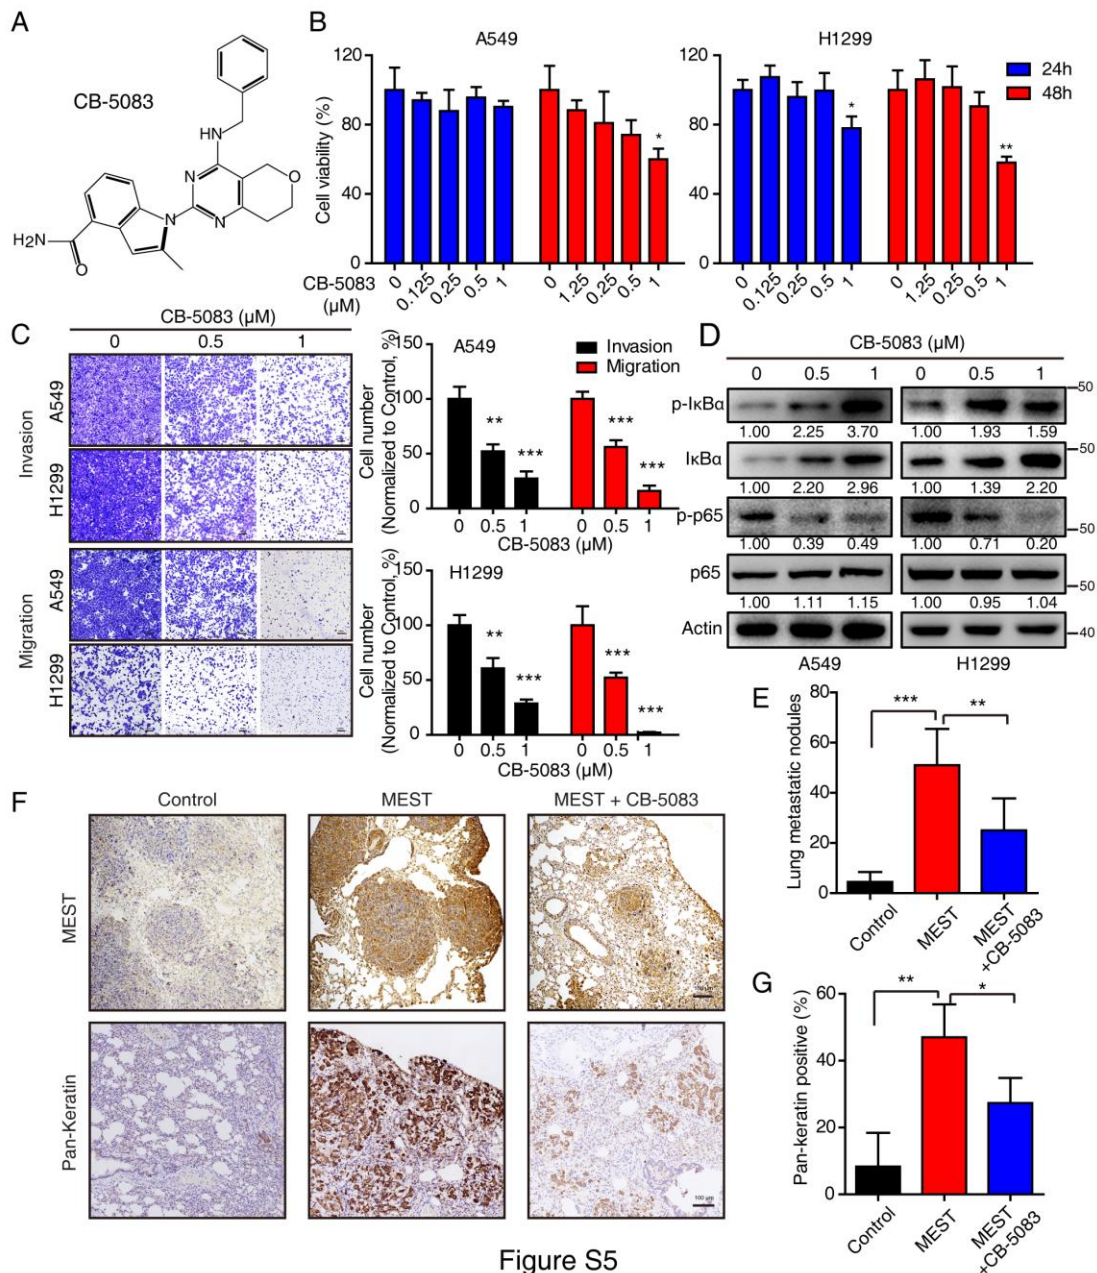

Figure S5

88

89 **Figure S5. Effect of CB-5083 on cell invasion and migration, and NF-κB**  
 90 **signaling.** (A) The chemical structure of CB-5083, a VCP specific inhibitor. (B) Both  
 91 A549 and H1299 cells were treated with elevating concentration of CB-5083 (up to 1  
 92 μM) or DMSO for 24 and 48 h, respectively, and the cell viability was detected by  
 93 WST-1 assay. (C) A549 and H1299 were treated with 0.5 and 1 μM of CB-5083 for 48  
 94 h, and the cell invasion and migration were detected by transwell assays, and the  
 95 protein expressions of p-IκBα, IκBα, p-p65 and p65 were determined by western blot

96 analysis (D). (E-G) NCG mice were transplanted with A549 cells with or without  
 97 MEST overexpression *via* tail vein injection, the indicated treatment group and  
 98 control group were respectively orally administered either CB-5083 (30 mg kg<sup>-1</sup>) or  
 99 vehicle every two days. The lungs were harvested 1.5 months post-transplantation.  
 100 The expression of MEST and pan-keratin in metastatic nodules was determined by  
 101 IHC staining (F). Lungs from mice injected with MEST-expressing cells showed  
 102 significantly more incidence of lung metastasis, while treatment of CB-5083  
 103 suppressed this effect, as evidenced by the lung metastatic nodules (E) and  
 104 pan-keratin positive ratio (G). scale bar, 100  $\mu$ m. Bars, SD. \*,  $P < 0.05$ ; \*\*,  $P < 0.01$ ;  
 105 \*\*\*,  $P < 0.001$  compared with control group unless otherwise indicated.

106 **Supplementary Figure S6.**

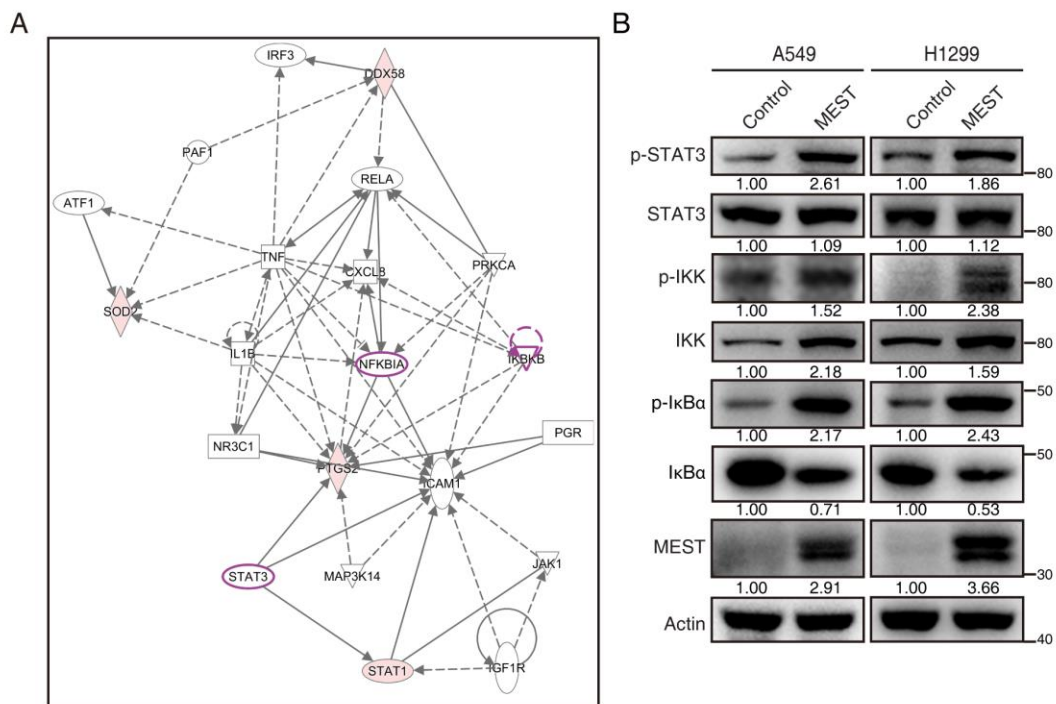

Figure S6

107  
 108 **Figure S6. SILAC proteomics reveals that MEST activates STAT3-IKK signaling.**  
 109 (A) Two independent label-swap experiments including forward labeling (MEST,  
 110 “Light”) and reverse labeling (MEST, “High”) were performed. The MEST regulated  
 111 differentially expressed proteins were analyzed by IPA, showing that MEST-regulated

112 proteins are mainly involved in the regulation of cell survival and inflammatory  
113 response, including STAT3 and NF- $\kappa$ B signaling. (B) MEST induces I $\kappa$ B $\alpha$   
114 phosphorylation by activating STAT3-IKK signaling. Cell lysates of A549 and H1299  
115 with or without MEST overexpression were subjected to western blot analysis for the  
116 detection of p-STAT3, STAT3, p-IKK, IKK, p-I $\kappa$ B $\alpha$  and I $\kappa$ B $\alpha$ .

117

118 **Supplementary Table**

119 **Supplementary Table. S1** Overview of proteins identifications and quantifications  
120 for the comparisons of A549-i8 (labeled with “light” chain) verse parental A549  
121 (labeled with “heavy” chain).

122 See separate excel file.

123

124 **Supplementary Table. S2** Differentially expressed proteins regulated by MEST  
125 overexpression.

126 See separate excel file.

127

128 **Supplementary Table. S3** Potential MEST binding proteins identified by  
129 co-immunoprecipitation/ MS.

130 See separate excel file.

131

132

133 **Supplementary Table S4.** Cox proportional hazard regression analyses of MEST in  
 134 lung cancer patients

| Clinicopathological features |                                   | HR    | 95% CI      | P value       |
|------------------------------|-----------------------------------|-------|-------------|---------------|
| Gender                       | Female vs. Male                   | 0.899 | 0.488-1.658 | 0.734         |
| Age                          | >55 years vs. ≤55 years           | 1.083 | 0.564-2.079 | 0.811         |
| stage                        | Stages I & II vs. Stages III & IV | 0.899 | 0.448-1.804 | 0.764         |
| T                            | T1/2 vs. T3/4                     | 1.067 | 0.559-2.037 | 0.844         |
| N                            | N0 vs. N1                         | 0.307 | 0.165-0.572 | <b>0.0002</b> |
| M                            | M0 vs. M1                         | 0.364 | 0.042-3.165 | 0.36          |
| MEST expression              | Absent vs. Present                | 0.541 | 0.299-0.979 | <b>0.042</b>  |

135  
 136 **Supplementary Table S5.** Cox proportional hazard regression analyses of VCP in  
 137 lung cancer patients

| Clinicopathological features |                                   | HR    | 95% CI      | P value      |
|------------------------------|-----------------------------------|-------|-------------|--------------|
| Gender                       | Female vs. Male                   | 1.039 | 0.548-1.972 | 0.906        |
| Age                          | >55 years vs. ≤55 years           | 0.899 | 0.469-1.725 | 0.749        |
| stage                        | Stages I & II vs. Stages III & IV | 0.85  | 0.457-1.581 | 0.608        |
| T                            | T1/2 vs. T3/4                     | 0.85  | 0.446-1.619 | 0.621        |
| N                            | N0 vs. N1                         | 0.475 | 0.237-0.95  | <b>0.035</b> |
| M                            | M0 vs. M1                         | 0.521 | 0.061-4.413 | 0.55         |
| VCP score                    | Absent vs. Present                | 1.539 | 0.773-3.065 | 0.22         |

138

139

140 **Supplementary Table. S6.** The characteristics of patients in tissue microarray  
 141 consisting of 30 primary lung cancer tissues and matched metastatic tissues

| <b>Characteristics</b>             | <b>No. Cases (%)</b> |
|------------------------------------|----------------------|
| <b>Age (y)</b>                     |                      |
| ≤55                                | 16 (53.33%)          |
| >55                                | 14 (46.67%)          |
| <b>Gender</b>                      |                      |
| Male                               | 16 (53.33%)          |
| Female                             | 14 (46.67%)          |
| <b>Tumour laterality</b>           |                      |
| RUL                                | 11 (36.67%)          |
| RML                                | 4 (13.33%)           |
| RLL                                | 4 (13.33%)           |
| LUL                                | 7 (23.33%)           |
| LLL                                | 4 (13.33%)           |
| <b>Pathologic stage</b>            |                      |
| < II                               | 20 (66.67%)          |
| ≥ II                               | 10 (33.33%)          |
| <b>No. Lymph node metastasis</b>   |                      |
| ≤3                                 | 17 (56.67%)          |
| >3                                 | 13 (43.33%)          |
| <b>Lymph Node Metastasis</b>       |                      |
| Supracavicular zone (#1)           | 4 (13.33%)           |
| Upper zone (#2, #3, #4)            | 9 (30.00%)           |
| AP zone (#5, #6)                   | 5 (16.67%)           |
| lower zone (#7, #8, #9)            | 4 (13.33%)           |
| N1 nodes (#10, #11, #12, #13, #14) | 8 (26.67%)           |

142 RUL, right upper lobe; RML, right middle lobe; RLL, right lower lobe; LUL, left upper lobe; LLL,  
 143 left lower lobe. The lymph node metastasis analysis is based on IASLC lymph node map.

144

**Supplementary Table. S1 Overview of proteins identifications and quantifications for the comparisons of A549-i8 (labeled with “light” chain) verse parental A549 (labeled with “heavy” chain)**

| Uniprot ID | Gene name | Unique peptides | Abundance |       |       |       |       |       | Abundance Ratio (Light/Heavy) |              |              |         | P-value  | Adjusted P-value |         |
|------------|-----------|-----------------|-----------|-------|-------|-------|-------|-------|-------------------------------|--------------|--------------|---------|----------|------------------|---------|
|            |           |                 | Light     |       |       | Heavy |       |       | (I8-1)/(P-1)                  |              | (I8-2)/(P-2) |         |          |                  | Mean FC |
|            |           |                 | I8-1      | I8-2  | I8-3  | P-1   | P-2   | P-3   | (I8-1)/(P-1)                  | (I8-2)/(P-2) |              |         |          |                  |         |
| P02768     | ALB       | 9               | 199.9     | 200   | 199.9 | 0.1   | 0.1   | 0.1   | 1999.00                       | 2000.00      | 1999.00      | 1999.33 | 1.86E-14 | 1.09E-07         |         |
| Q9NQW6     | ANLN      | 18              | 182.7     | 182.4 | 182   | 17.3  | 17.6  | 18    | 10.56                         | 10.36        | 10.11        | 10.35   | 5.51E-11 | 0.000161819      |         |
| O14683     | TP53I11   | 3               | 3.8       | 2.8   | 3.2   | 196.2 | 197.2 | 196.8 | 0.02                          | 0.01         | 0.02         | 0.02    | 1.22E-10 | 0.000239254      |         |
| P40222     | TXLNA     | 18              | 151.5     | 151.5 | 150.9 | 48.5  | 48.5  | 49.1  | 3.12                          | 3.12         | 3.07         | 3.11    | 3.47E-10 | 0.000290862      |         |
| P31327     | CPS1      | 56              | 9         | 7.8   | 8.2   | 191   | 192.2 | 191.8 | 0.05                          | 0.04         | 0.04         | 0.04    | 3.29E-10 | 0.000290862      |         |
| Q13740     | ALCAM     | 15              | 5.4       | 6.5   | 6.4   | 194.6 | 193.5 | 193.6 | 0.03                          | 0.03         | 0.03         | 0.03    | 2.93E-10 | 0.000290862      |         |
| Q14315     | FLNC      | 147             | 177       | 177.7 | 176.8 | 23    | 22.3  | 23.2  | 7.70                          | 7.97         | 7.62         | 7.76    | 2.34E-10 | 0.000290862      |         |
| Q15424     | SAFB      | 8               | 169.2     | 169.3 | 168.3 | 30.8  | 30.7  | 31.7  | 5.49                          | 5.51         | 5.31         | 5.44    | 6.79E-10 | 0.000498788      |         |
| O60506     | SYNCRIP   | 26              | 166.7     | 165.7 | 166.9 | 33.3  | 34.3  | 33.1  | 5.01                          | 4.83         | 5.04         | 4.96    | 1.46E-09 | 0.000954296      |         |
| Q5BKZ1     | ZNF326    | 11              | 172.5     | 172.8 | 171.3 | 27.5  | 27.2  | 28.7  | 6.27                          | 6.35         | 5.97         | 6.20    | 2.43E-09 | 0.001430171      |         |
| O14497     | ARID1A    | 27              | 159.8     | 160.4 | 161.3 | 40.2  | 39.6  | 38.7  | 3.98                          | 4.05         | 4.17         | 4.06    | 4.04E-09 | 0.002158611      |         |
| P98179     | RBM3      | 4               | 163.1     | 161.4 | 162   | 36.9  | 38.6  | 38    | 4.42                          | 4.18         | 4.26         | 4.29    | 6.16E-09 | 0.002786216      |         |
| Q96KR1     | ZFR       | 23              | 165.8     | 167.4 | 167.4 | 34.2  | 32.6  | 32.6  | 4.85                          | 5.13         | 5.13         | 5.04    | 6.07E-09 | 0.002786216      |         |
| P36639     | NUDT1     | 4               | 157.2     | 156.7 | 155.5 | 42.8  | 43.3  | 44.5  | 3.67                          | 3.62         | 3.49         | 3.60    | 9.55E-09 | 0.003586653      |         |
| Q02952     | AKAP12    | 85              | 190.6     | 188.6 | 191.4 | 9.4   | 11.4  | 8.6   | 20.28                         | 16.54        | 22.26        | 19.69   | 1.09E-08 | 0.003586653      |         |
| Q9H307     | PNN       | 10              | 167.6     | 165.8 | 167.5 | 32.4  | 34.2  | 32.5  | 5.17                          | 4.85         | 5.15         | 5.06    | 8.68E-09 | 0.003586653      |         |
| P06703     | S100A6    | 4               | 5.9       | 8.6   | 6.2   | 194.1 | 191.4 | 193.8 | 0.03                          | 0.04         | 0.03         | 0.04    | 1.06E-08 | 0.003586653      |         |
| Q587J7     | TDRD12    | 32              | 197.7     | 194.9 | 195.2 | 2.3   | 5.1   | 4.8   | 85.96                         | 38.22        | 40.67        | 54.95   | 1.10E-08 | 0.003586653      |         |
| Q14195     | DPYSL3    | 12              | 159.7     | 157.8 | 159   | 40.3  | 42.2  | 41    | 3.96                          | 3.74         | 3.88         | 3.86    | 1.19E-08 | 0.003666527      |         |
| P04264     | KRT1      | 40              | 195.5     | 195   | 192.5 | 4.5   | 5     | 7.5   | 43.44                         | 39.00        | 25.67        | 36.04   | 1.40E-08 | 0.004125191      |         |
| P21980     | TGM2      | 29              | 18.7      | 16.9  | 19.7  | 181.3 | 183.1 | 180.3 | 0.10                          | 0.09         | 0.11         | 0.10    | 1.53E-08 | 0.00426903       |         |
| Q15758     | SLC1A5    | 13              | 50.4      | 49.5  | 48.6  | 149.6 | 150.5 | 151.4 | 0.34                          | 0.33         | 0.32         | 0.33    | 1.68E-08 | 0.004488927      |         |
| P14866     | HNRNPL    | 23              | 160.3     | 159.5 | 161.7 | 39.7  | 40.5  | 38.3  | 4.04                          | 3.94         | 4.22         | 4.07    | 1.91E-08 | 0.004884775      |         |
| P48163     | ME1       | 14              | 20.7      | 23.4  | 21.1  | 179.3 | 176.6 | 178.9 | 0.12                          | 0.13         | 0.12         | 0.12    | 2.00E-08 | 0.004900772      |         |
| P30530     | AXL       | 15              | 182.3     | 185.5 | 184.6 | 17.7  | 14.5  | 15.4  | 10.30                         | 12.79        | 11.99        | 11.69   | 2.47E-08 | 0.005795856      |         |
| PODJ93     | SMIM13    | 2               | 130.2     | 131.2 | 130   | 69.8  | 68.8  | 70    | 1.87                          | 1.91         | 1.86         | 1.88    | 3.30E-08 | 0.00746495       |         |
| P33240     | CSTF2     | 3               | 133.3     | 133.8 | 134.8 | 66.7  | 66.2  | 65.2  | 2.00                          | 2.02         | 2.07         | 2.03    | 4.26E-08 | 0.008297028      |         |
| P43358     | MAGEA4    | 13              | 195.9     | 199.8 | 199.7 | 4.1   | 0.2   | 0.3   | 47.78                         | 999.00       | 665.67       | 570.82  | 4.33E-08 | 0.008297028      |         |
| O14684     | PTGES     | 2               | 13.2      | 9.8   | 13.2  | 186.8 | 190.2 | 186.8 | 0.07                          | 0.05         | 0.07         | 0.06    | 4.14E-08 | 0.008297028      |         |
| Q9Y520     | PRRC2C    | 39              | 153.8     | 151.5 | 153   | 46.2  | 48.5  | 47    | 3.33                          | 3.12         | 3.26         | 3.24    | 3.99E-08 | 0.008297028      |         |
| O60231     | DHX16     | 14              | 173       | 176.2 | 173.7 | 27    | 23.8  | 26.3  | 6.41                          | 7.40         | 6.60         | 6.81    | 4.38E-08 | 0.008297028      |         |
| Q5EB52     | MEST      | 4               | 175.3     | 178.8 | 177.5 | 24.7  | 21.2  | 22.5  | 7.10                          | 8.43         | 7.89         | 7.81    | 4.59E-08 | 0.008435874      |         |
| O60701     | UGDH      | 43              | 22.8      | 19.2  | 21.5  | 177.2 | 180.8 | 178.5 | 0.13                          | 0.11         | 0.12         | 0.12    | 4.76E-08 | 0.008481063      |         |
| P29401     | TKT       | 50              | 28.5      | 25.4  | 28.2  | 171.5 | 174.6 | 171.8 | 0.17                          | 0.15         | 0.16         | 0.16    | 5.11E-08 | 0.008838539      |         |

|        |         |    |       |       |       |       |       |       |       |       |       |       |          |             |
|--------|---------|----|-------|-------|-------|-------|-------|-------|-------|-------|-------|-------|----------|-------------|
| P08133 | ANXA6   | 49 | 169.6 | 167.5 | 170.9 | 30.4  | 32.5  | 29.1  | 5.58  | 5.15  | 5.87  | 5.54  | 6.24E-08 | 0.009697422 |
| Q07666 | KHDRBS1 | 11 | 164.7 | 163.2 | 166.4 | 35.3  | 36.8  | 33.6  | 4.67  | 4.43  | 4.95  | 4.68  | 6.22E-08 | 0.009697422 |
| P49756 | RBM25   | 11 | 173.5 | 170.8 | 174.2 | 26.5  | 29.2  | 25.8  | 6.55  | 5.85  | 6.75  | 6.38  | 6.15E-08 | 0.009697422 |
| O95352 | ATG7    | 11 | 145.2 | 143.2 | 145   | 54.8  | 56.8  | 55    | 2.65  | 2.52  | 2.64  | 2.60  | 6.27E-08 | 0.009697422 |
| Q06323 | PSME1   | 15 | 60.4  | 62.2  | 61.9  | 139.6 | 137.8 | 138.1 | 0.43  | 0.45  | 0.45  | 0.44  | 6.56E-08 | 0.009878014 |
| P33316 | DUT     | 12 | 145.8 | 146.9 | 148.2 | 54.2  | 53.1  | 51.8  | 2.69  | 2.77  | 2.86  | 2.77  | 7.13E-08 | 0.00997524  |
| A0FGR8 | ESYT2   | 11 | 62.5  | 64    | 64.2  | 137.5 | 136   | 135.8 | 0.45  | 0.47  | 0.47  | 0.47  | 7.05E-08 | 0.00997524  |
| P48507 | GCLM    | 9  | 57.4  | 55.2  | 56.5  | 142.6 | 144.8 | 143.5 | 0.40  | 0.38  | 0.39  | 0.39  | 6.88E-08 | 0.00997524  |
| Q9H2H9 | SLC38A1 | 3  | 171.2 | 174.2 | 170.8 | 28.8  | 25.8  | 29.2  | 5.94  | 6.75  | 5.85  | 6.18  | 7.36E-08 | 0.010061529 |
| O95864 | FADS2   | 7  | 3.9   | 8.8   | 4.9   | 196.1 | 191.2 | 195.1 | 0.02  | 0.05  | 0.03  | 0.03  | 9.53E-08 | 0.012443553 |
| P17096 | HMGA1   | 4  | 181.1 | 177.1 | 177.7 | 18.9  | 22.9  | 22.3  | 9.58  | 7.73  | 7.97  | 8.43  | 9.43E-08 | 0.012443553 |
| Q8NDI1 | EHBP1   | 17 | 28.7  | 26.1  | 24.6  | 171.3 | 173.9 | 175.4 | 0.17  | 0.15  | 0.14  | 0.15  | 1.05E-07 | 0.013188108 |
| O00267 | SUPT5H  | 38 | 165.4 | 165.5 | 168.7 | 34.6  | 34.5  | 31.3  | 4.78  | 4.80  | 5.39  | 4.99  | 1.05E-07 | 0.013188108 |
| O15438 | ABCC3   | 12 | 4.3   | 5.7   | 9.5   | 195.7 | 194.3 | 190.5 | 0.02  | 0.03  | 0.05  | 0.03  | 1.14E-07 | 0.013454496 |
| P06396 | GSN     | 30 | 170.9 | 167.1 | 170   | 29.1  | 32.9  | 30    | 5.87  | 5.08  | 5.67  | 5.54  | 1.12E-07 | 0.013454496 |
| P55011 | SLC12A2 | 28 | 27.7  | 24.2  | 28    | 172.3 | 175.8 | 172   | 0.16  | 0.14  | 0.16  | 0.15  | 1.14E-07 | 0.013454496 |
| Q96QD8 | SLC38A2 | 5  | 171.4 | 170.9 | 174.9 | 28.6  | 29.1  | 25.1  | 5.99  | 5.87  | 6.97  | 6.28  | 1.37E-07 | 0.015752142 |
| P15144 | ANPEP   | 31 | 178.2 | 178.9 | 174.5 | 21.8  | 21.1  | 25.5  | 8.17  | 8.48  | 6.84  | 7.83  | 1.46E-07 | 0.015937572 |
| O00244 | ATOX1   | 2  | 170.8 | 168.5 | 172.8 | 29.2  | 31.5  | 27.2  | 5.85  | 5.35  | 6.35  | 5.85  | 1.43E-07 | 0.015937572 |
| P84103 | SRSF3   | 8  | 152.6 | 150.8 | 149.5 | 47.4  | 49.2  | 50.5  | 3.22  | 3.07  | 2.96  | 3.08  | 1.45E-07 | 0.015937572 |
| O95239 | KIF4A   | 29 | 185.7 | 182.7 | 188   | 14.3  | 17.3  | 12    | 12.99 | 10.56 | 15.67 | 13.07 | 1.56E-07 | 0.016333973 |
| P46821 | MAP1B   | 93 | 40.9  | 37.9  | 41.3  | 159.1 | 162.1 | 158.7 | 0.26  | 0.23  | 0.26  | 0.25  | 1.54E-07 | 0.016333973 |
| P18887 | XRCC1   | 12 | 172.6 | 169.8 | 168.1 | 27.4  | 30.2  | 31.9  | 6.30  | 5.62  | 5.27  | 5.73  | 1.83E-07 | 0.018664485 |
| O60502 | MGEA5   | 32 | 166.6 | 162.4 | 164.7 | 33.4  | 37.6  | 35.3  | 4.99  | 4.32  | 4.67  | 4.66  | 1.87E-07 | 0.018664485 |
| Q9UKL0 | RCOR1   | 3  | 151.3 | 151.4 | 154.3 | 48.7  | 48.6  | 45.7  | 3.11  | 3.12  | 3.38  | 3.20  | 1.87E-07 | 0.018664485 |
| Q05682 | CALD1   | 19 | 51    | 49.6  | 52.8  | 149   | 150.4 | 147.2 | 0.34  | 0.33  | 0.36  | 0.34  | 1.93E-07 | 0.018931461 |
| O15344 | MID1    | 3  | 14.2  | 14.8  | 19.3  | 185.8 | 185.2 | 180.7 | 0.08  | 0.08  | 0.11  | 0.09  | 2.03E-07 | 0.019091406 |
| O60341 | KDM1A   | 11 | 148   | 145.3 | 145.4 | 52    | 54.7  | 54.6  | 2.85  | 2.66  | 2.66  | 2.72  | 2.00E-07 | 0.019091406 |
| Q9UQE7 | SMC3    | 40 | 157.8 | 154.1 | 156.4 | 42.2  | 45.9  | 43.6  | 3.74  | 3.36  | 3.59  | 3.56  | 2.05E-07 | 0.019091406 |
| O14786 | NRP1    | 6  | 3.8   | 3.7   | 9.3   | 196.2 | 196.3 | 190.7 | 0.02  | 0.02  | 0.05  | 0.03  | 2.21E-07 | 0.019984699 |
| P62328 | TMSB4X  | 6  | 43.3  | 44.8  | 47    | 156.7 | 155.2 | 153   | 0.28  | 0.29  | 0.31  | 0.29  | 2.19E-07 | 0.019984699 |
| Q9H7B2 | RPF2    | 5  | 138.7 | 138.8 | 136.5 | 61.3  | 61.2  | 63.5  | 2.26  | 2.27  | 2.15  | 2.23  | 2.28E-07 | 0.020297592 |
| Q8IYB3 | SRRM1   | 8  | 147.9 | 148.6 | 145.5 | 52.1  | 51.4  | 54.5  | 2.84  | 2.89  | 2.67  | 2.80  | 2.32E-07 | 0.020319152 |
| Q9HAV4 | XPO5    | 36 | 166.8 | 162.3 | 164.7 | 33.2  | 37.7  | 35.3  | 5.02  | 4.31  | 4.67  | 4.66  | 2.46E-07 | 0.021227795 |
| O00425 | IGF2BP3 | 11 | 144.4 | 143.6 | 146.7 | 55.6  | 56.4  | 53.3  | 2.60  | 2.55  | 2.75  | 2.63  | 2.75E-07 | 0.02339157  |
| P55061 | TMBIM6  | 2  | 146   | 144.1 | 147.4 | 54    | 55.9  | 52.6  | 2.70  | 2.58  | 2.80  | 2.69  | 2.84E-07 | 0.023488599 |
| Q6IA69 | NADSYN1 | 6  | 25.9  | 29.9  | 30.7  | 174.1 | 170.1 | 169.3 | 0.15  | 0.18  | 0.18  | 0.17  | 2.84E-07 | 0.023488599 |
| Q12797 | ASPH    | 21 | 51.9  | 48.4  | 51    | 148.1 | 151.6 | 149   | 0.35  | 0.32  | 0.34  | 0.34  | 3.01E-07 | 0.024551549 |
| P18583 | SON     | 9  | 174.2 | 174.8 | 169.8 | 25.8  | 25.2  | 30.2  | 6.75  | 6.94  | 5.62  | 6.44  | 3.27E-07 | 0.026297358 |
| Q10570 | CPSF1   | 24 | 146.2 | 144   | 147.5 | 53.8  | 56    | 52.5  | 2.72  | 2.57  | 2.81  | 2.70  | 3.67E-07 | 0.028393685 |
| O95479 | H6PD    | 9  | 52    | 53.7  | 50    | 148   | 146.3 | 150   | 0.35  | 0.37  | 0.33  | 0.35  | 3.66E-07 | 0.028393685 |

|        |         |    |       |       |       |       |       |       |       |       |       |       |          |             |
|--------|---------|----|-------|-------|-------|-------|-------|-------|-------|-------|-------|-------|----------|-------------|
| P43243 | MATR3   | 30 | 165.8 | 161.7 | 161.5 | 34.2  | 38.3  | 38.5  | 4.85  | 4.22  | 4.19  | 4.42  | 3.66E-07 | 0.028393685 |
| O43143 | DHX15   | 30 | 129.8 | 128.1 | 130.3 | 70.2  | 71.9  | 69.7  | 1.85  | 1.78  | 1.87  | 1.83  | 3.94E-07 | 0.028575957 |
| Q9BVG4 | PBDC1   | 6  | 112.2 | 111.6 | 111.3 | 87.8  | 88.4  | 88.7  | 1.28  | 1.26  | 1.25  | 1.27  | 3.92E-07 | 0.028575957 |
| P04179 | SOD2    | 12 | 27.7  | 32.3  | 27.3  | 172.3 | 167.7 | 172.7 | 0.16  | 0.19  | 0.16  | 0.17  | 3.92E-07 | 0.028575957 |
| Q92922 | SMARCC1 | 19 | 174.3 | 168.9 | 170.5 | 25.7  | 31.1  | 29.5  | 6.78  | 5.43  | 5.78  | 6.00  | 3.82E-07 | 0.028575957 |
| P26640 | VARS    | 47 | 147.1 | 147.6 | 150.6 | 52.9  | 52.4  | 49.4  | 2.78  | 2.82  | 3.05  | 2.88  | 3.88E-07 | 0.028575957 |
| P40429 | RPL13A  | 12 | 127.8 | 125.7 | 127.2 | 72.2  | 74.3  | 72.8  | 1.77  | 1.69  | 1.75  | 1.74  | 4.35E-07 | 0.030790636 |
| P42892 | ECE1    | 12 | 161.1 | 162.8 | 158   | 38.9  | 37.2  | 42    | 4.14  | 4.38  | 3.76  | 4.09  | 4.32E-07 | 0.030790636 |
| Q15185 | PTGES3  | 7  | 139.4 | 137.3 | 140.4 | 60.6  | 62.7  | 59.6  | 2.30  | 2.19  | 2.36  | 2.28  | 4.49E-07 | 0.031045412 |
| O43290 | SART1   | 13 | 159.8 | 155.2 | 157   | 40.2  | 44.8  | 43    | 3.98  | 3.46  | 3.65  | 3.70  | 4.45E-07 | 0.031045412 |
| O95340 | PAPSS2  | 13 | 71.8  | 72.2  | 70    | 128.2 | 127.8 | 130   | 0.56  | 0.56  | 0.54  | 0.55  | 4.65E-07 | 0.031547814 |
| Q16719 | KYNU    | 17 | 12.8  | 11    | 5.7   | 187.2 | 189   | 194.3 | 0.07  | 0.06  | 0.03  | 0.05  | 4.67E-07 | 0.031547814 |
| Q9BYX4 | IFIH1   | 13 | 181.5 | 175.3 | 180.1 | 18.5  | 24.7  | 19.9  | 9.81  | 7.10  | 9.05  | 8.65  | 4.78E-07 | 0.03193465  |
| P46939 | UTRN    | 31 | 141.2 | 138.5 | 141.6 | 58.8  | 61.5  | 58.4  | 2.40  | 2.25  | 2.42  | 2.36  | 5.03E-07 | 0.033218694 |
| Q8N357 | SLC35F6 | 2  | 34.8  | 33.2  | 29.3  | 165.2 | 166.8 | 170.7 | 0.21  | 0.20  | 0.17  | 0.19  | 5.11E-07 | 0.033376272 |
| O43491 | EPB41L2 | 42 | 181.2 | 175   | 180.1 | 18.8  | 25    | 19.9  | 9.64  | 7.00  | 9.05  | 8.56  | 5.18E-07 | 0.033415757 |
| P80723 | BASP1   | 18 | 29.2  | 23.6  | 28.6  | 170.8 | 176.4 | 171.4 | 0.17  | 0.13  | 0.17  | 0.16  | 5.27E-07 | 0.033676103 |
| P98088 | MUC5AC  | 19 | 1.4   | 6.6   | 9.3   | 198.6 | 193.4 | 190.7 | 0.01  | 0.03  | 0.05  | 0.03  | 5.48E-07 | 0.034645499 |
| P48506 | GCLC    | 24 | 31.5  | 35.3  | 29.5  | 168.5 | 164.7 | 170.5 | 0.19  | 0.21  | 0.17  | 0.19  | 5.90E-07 | 0.036462193 |
| P41223 | BUD31   | 6  | 166.1 | 160.7 | 164.4 | 33.9  | 39.3  | 35.6  | 4.90  | 4.09  | 4.62  | 4.54  | 5.86E-07 | 0.036462193 |
| P09525 | ANXA4   | 35 | 42.4  | 39.3  | 44.4  | 157.6 | 160.7 | 155.6 | 0.27  | 0.24  | 0.29  | 0.27  | 6.42E-07 | 0.037017692 |
| O43633 | CHMP2A  | 11 | 75.1  | 73.9  | 76.1  | 124.9 | 126.1 | 123.9 | 0.60  | 0.59  | 0.61  | 0.60  | 6.30E-07 | 0.037017692 |
| Q12860 | CNTN1   | 41 | 13    | 7     | 14.4  | 187   | 193   | 185.6 | 0.07  | 0.04  | 0.08  | 0.06  | 6.46E-07 | 0.037017692 |
| P78347 | GTF2I   | 30 | 132.5 | 129.8 | 130.9 | 67.5  | 70.2  | 69.1  | 1.96  | 1.85  | 1.89  | 1.90  | 6.07E-07 | 0.037017692 |
| O94776 | MTA2    | 12 | 142.8 | 139.2 | 140.7 | 57.2  | 60.8  | 59.3  | 2.50  | 2.29  | 2.37  | 2.39  | 6.35E-07 | 0.037017692 |
| Q9BZQ8 | FAM129A | 8  | 164.8 | 164.1 | 159.7 | 35.2  | 35.9  | 40.3  | 4.68  | 4.57  | 3.96  | 4.41  | 6.22E-07 | 0.037017692 |
| Q96D71 | REPS1   | 8  | 178.7 | 172.5 | 178   | 21.3  | 27.5  | 22    | 8.39  | 6.27  | 8.09  | 7.58  | 6.49E-07 | 0.037017692 |
| P08240 | SRPRA   | 11 | 189.4 | 181.9 | 185.2 | 10.6  | 18.1  | 14.8  | 17.87 | 10.05 | 12.51 | 13.48 | 6.21E-07 | 0.037017692 |
| Q8WY22 | BRI3BP  | 3  | 47.6  | 42.7  | 44.8  | 152.4 | 157.3 | 155.2 | 0.31  | 0.27  | 0.29  | 0.29  | 6.65E-07 | 0.037019103 |
| P26358 | DNMT1   | 46 | 155.8 | 151.5 | 151.9 | 44.2  | 48.5  | 48.1  | 3.52  | 3.12  | 3.16  | 3.27  | 6.68E-07 | 0.037019103 |
| P17844 | DDX5    | 24 | 148.5 | 147.9 | 152   | 51.5  | 52.1  | 48    | 2.88  | 2.84  | 3.17  | 2.96  | 6.68E-07 | 0.037019103 |
| P51610 | HCFC1   | 34 | 121.5 | 123.5 | 122.3 | 78.5  | 76.5  | 77.7  | 1.55  | 1.61  | 1.57  | 1.58  | 6.74E-07 | 0.037024449 |
| P06756 | ITGAV   | 23 | 53.5  | 57.5  | 55.1  | 146.5 | 142.5 | 144.9 | 0.37  | 0.40  | 0.38  | 0.38  | 6.88E-07 | 0.037453843 |
| P00568 | AK1     | 14 | 154.9 | 157.2 | 160.1 | 45.1  | 42.8  | 39.9  | 3.43  | 3.67  | 4.01  | 3.71  | 7.06E-07 | 0.037724878 |
| Q9NUM4 | TMEM106 | 5  | 24.9  | 31.4  | 27.5  | 175.1 | 168.6 | 172.5 | 0.14  | 0.19  | 0.16  | 0.16  | 7.06E-07 | 0.037724878 |
| Q6UWE0 | LRSAM1  | 4  | 156   | 160.8 | 156.5 | 44    | 39.2  | 43.5  | 3.55  | 4.10  | 3.60  | 3.75  | 7.24E-07 | 0.038162034 |
| O14737 | PDCD5   | 7  | 162.7 | 157.4 | 158.9 | 37.3  | 42.6  | 41.1  | 4.36  | 3.69  | 3.87  | 3.97  | 7.31E-07 | 0.038162034 |
| Q5VYK3 | ECM29   | 48 | 148.5 | 148.4 | 152.4 | 51.5  | 51.6  | 47.6  | 2.88  | 2.88  | 3.20  | 2.99  | 7.34E-07 | 0.038162034 |
| Q15021 | NCAPD2  | 29 | 149.2 | 146.7 | 151.3 | 50.8  | 53.3  | 48.7  | 2.94  | 2.75  | 3.11  | 2.93  | 8.07E-07 | 0.041581346 |
| P35527 | KRT9    | 25 | 197.6 | 194.3 | 188.8 | 2.4   | 5.7   | 11.2  | 82.33 | 34.09 | 16.86 | 44.43 | 8.47E-07 | 0.043105378 |
| Q3KQU3 | MAP7D1  | 14 | 173.3 | 171.2 | 178.1 | 26.7  | 28.8  | 21.9  | 6.49  | 5.94  | 8.13  | 6.86  | 8.58E-07 | 0.043105378 |



|        |         |    |       |       |       |       |       |       |       |       |       |       |          |             |
|--------|---------|----|-------|-------|-------|-------|-------|-------|-------|-------|-------|-------|----------|-------------|
| Q9NTZ6 | RBM12   | 9  | 124.4 | 122.2 | 123.6 | 75.6  | 77.8  | 76.4  | 1.65  | 1.57  | 1.62  | 1.61  | 8.53E-07 | 0.043105378 |
| Q9BXP5 | SRRT    | 28 | 140.5 | 143.6 | 144.4 | 59.5  | 56.4  | 55.6  | 2.36  | 2.55  | 2.60  | 2.50  | 8.89E-07 | 0.044279586 |
| P20591 | MX1     | 11 | 10.6  | 2.2   | 9.1   | 189.4 | 197.8 | 190.9 | 0.06  | 0.01  | 0.05  | 0.04  | 9.07E-07 | 0.044681828 |
| Q8ND24 | RNF214  | 6  | 144.7 | 144.6 | 148.5 | 55.3  | 55.4  | 51.5  | 2.62  | 2.61  | 2.88  | 2.70  | 9.13E-07 | 0.044681828 |
| P52272 | HNRNPM  | 43 | 159.8 | 155.5 | 160.9 | 40.2  | 44.5  | 39.1  | 3.98  | 3.49  | 4.12  | 3.86  | 9.26E-07 | 0.044983802 |
| P35659 | DEK     | 9  | 138.7 | 138.4 | 141.9 | 61.3  | 61.6  | 58.1  | 2.26  | 2.25  | 2.44  | 2.32  | 9.51E-07 | 0.045797675 |
| P35579 | MYH9    | 94 | 175.5 | 169.3 | 175.6 | 24.5  | 30.7  | 24.4  | 7.16  | 5.51  | 7.20  | 6.62  | 9.68E-07 | 0.046230478 |
| P49750 | YLPM1   | 17 | 137.5 | 140.2 | 141.3 | 62.5  | 59.8  | 58.7  | 2.20  | 2.34  | 2.41  | 2.32  | 9.81E-07 | 0.046505268 |
| O94822 | LTN1    | 10 | 179.2 | 173   | 180   | 20.8  | 27    | 20    | 8.62  | 6.41  | 9.00  | 8.01  | 9.98E-07 | 0.04691489  |
| Q7Z4S6 | KIF21A  | 28 | 155.4 | 150.6 | 155   | 44.6  | 49.4  | 45    | 3.48  | 3.05  | 3.44  | 3.33  | 1.01E-06 | 0.047015187 |
| P30838 | ALDH3A1 | 26 | 18.4  | 9.9   | 13.1  | 181.6 | 190.1 | 186.9 | 0.10  | 0.05  | 0.07  | 0.07  | 1.02E-06 | 0.047308146 |
| Q99943 | AGPAT1  | 2  | 156.9 | 153.9 | 151.5 | 43.1  | 46.1  | 48.5  | 3.64  | 3.34  | 3.12  | 3.37  | 1.04E-06 | 0.047723382 |
| Q92900 | UPF1    | 43 | 163   | 157.3 | 162.1 | 37    | 42.7  | 37.9  | 4.41  | 3.68  | 4.28  | 4.12  | 1.07E-06 | 0.048844581 |
| P05161 | ISG15   | 5  | 188.5 | 187.8 | 180.6 | 11.5  | 12.2  | 19.4  | 16.39 | 15.39 | 9.31  | 13.70 | 1.13E-06 | 0.051082138 |
| P27694 | RPA1    | 17 | 146.2 | 142.1 | 142.6 | 53.8  | 57.9  | 57.4  | 2.72  | 2.45  | 2.48  | 2.55  | 1.15E-06 | 0.051477912 |
| P46783 | RPS10   | 11 | 124.1 | 123.9 | 126.2 | 75.9  | 76.1  | 73.8  | 1.64  | 1.63  | 1.71  | 1.66  | 1.17E-06 | 0.051697283 |
| P46781 | RPS9    | 20 | 121.2 | 121.3 | 123.2 | 78.8  | 78.7  | 76.8  | 1.54  | 1.54  | 1.60  | 1.56  | 1.17E-06 | 0.051697283 |
| Q9UHY1 | NRBP1   | 8  | 145.6 | 147.4 | 150.5 | 54.4  | 52.6  | 49.5  | 2.68  | 2.80  | 3.04  | 2.84  | 1.20E-06 | 0.051756645 |
| P16989 | YBX3    | 9  | 168.9 | 162.4 | 164.1 | 31.1  | 37.6  | 35.9  | 5.43  | 4.32  | 4.57  | 4.77  | 1.19E-06 | 0.051756645 |
| Q86VM9 | ZC3H18  | 12 | 164.6 | 158.5 | 160.1 | 35.4  | 41.5  | 39.9  | 4.65  | 3.82  | 4.01  | 4.16  | 1.20E-06 | 0.051756645 |
| O60306 | AQR     | 16 | 151.1 | 155.9 | 151.2 | 48.9  | 44.1  | 48.8  | 3.09  | 3.54  | 3.10  | 3.24  | 1.22E-06 | 0.051785744 |
| O43379 | WDR62   | 16 | 184.4 | 178.2 | 186.5 | 15.6  | 21.8  | 13.5  | 11.82 | 8.17  | 13.81 | 11.27 | 1.21E-06 | 0.051785744 |
| Q8IUD2 | ERC1    | 9  | 155.2 | 155.5 | 150.5 | 44.8  | 44.5  | 49.5  | 3.46  | 3.49  | 3.04  | 3.33  | 1.23E-06 | 0.052098398 |
| P63313 | TMSB10  | 3  | 145.3 | 140.8 | 143.6 | 54.7  | 59.2  | 56.4  | 2.66  | 2.38  | 2.55  | 2.53  | 1.27E-06 | 0.053215672 |
| P14314 | PRKCSH  | 17 | 144.1 | 140.8 | 145.2 | 55.9  | 59.2  | 54.8  | 2.58  | 2.38  | 2.65  | 2.54  | 1.29E-06 | 0.053819725 |
| P52943 | CRIP2   | 9  | 149.6 | 154.3 | 154.6 | 50.4  | 45.7  | 45.4  | 2.97  | 3.38  | 3.41  | 3.25  | 1.32E-06 | 0.054515085 |
| O95155 | UBE4B   | 21 | 177.8 | 181   | 186.4 | 22.2  | 19    | 13.6  | 8.01  | 9.53  | 13.71 | 10.41 | 1.33E-06 | 0.054515085 |
| O75152 | ZC3H11A | 1  | 148.6 | 147.9 | 152.8 | 51.4  | 52.1  | 47.2  | 2.89  | 2.84  | 3.24  | 2.99  | 1.34E-06 | 0.054515085 |
| P42345 | MTOR    | 19 | 139.1 | 136.2 | 135.3 | 60.9  | 63.8  | 64.7  | 2.28  | 2.13  | 2.09  | 2.17  | 1.40E-06 | 0.056668111 |
| Q9H4G0 | EPB41L1 | 20 | 5.7   | 1     | 11.2  | 194.3 | 199   | 188.8 | 0.03  | 0.01  | 0.06  | 0.03  | 1.44E-06 | 0.05769102  |
| P18206 | VCL     | 83 | 150.5 | 146.2 | 151.1 | 49.5  | 53.8  | 48.9  | 3.04  | 2.72  | 3.09  | 2.95  | 1.44E-06 | 0.05769102  |
| Q96G03 | PGM2    | 8  | 171.2 | 174.2 | 166.5 | 28.8  | 25.8  | 33.5  | 5.94  | 6.75  | 4.97  | 5.89  | 1.51E-06 | 0.060117386 |
| Q9UKV3 | ACIN1   | 25 | 163.3 | 156.6 | 159.9 | 36.7  | 43.4  | 40.1  | 4.45  | 3.61  | 3.99  | 4.02  | 1.62E-06 | 0.063516488 |
| P57088 | TMEM33  | 5  | 146.4 | 143.3 | 148.4 | 53.6  | 56.7  | 51.6  | 2.73  | 2.53  | 2.88  | 2.71  | 1.61E-06 | 0.063516488 |
| P24941 | CDK2    | 7  | 141.1 | 137.6 | 141.8 | 58.9  | 62.4  | 58.2  | 2.40  | 2.21  | 2.44  | 2.35  | 1.64E-06 | 0.063655216 |
| O60333 | KIF1B   | 14 | 148.3 | 143.3 | 147   | 51.7  | 56.7  | 53    | 2.87  | 2.53  | 2.77  | 2.72  | 1.65E-06 | 0.063828207 |
| P04792 | HSPB1   | 18 | 66    | 65.5  | 62.3  | 134   | 134.5 | 137.7 | 0.49  | 0.49  | 0.45  | 0.48  | 1.72E-06 | 0.065958287 |
| O75533 | SF3B1   | 58 | 137.1 | 133.1 | 135.5 | 62.9  | 66.9  | 64.5  | 2.18  | 1.99  | 2.10  | 2.09  | 1.77E-06 | 0.067550569 |
| Q8NCW5 | NAXE    | 11 | 74.4  | 71.7  | 74.3  | 125.6 | 128.3 | 125.7 | 0.59  | 0.56  | 0.59  | 0.58  | 1.84E-06 | 0.06973948  |
| Q66K74 | MAP1S   | 10 | 152.6 | 153.5 | 158.5 | 47.4  | 46.5  | 41.5  | 3.22  | 3.30  | 3.82  | 3.45  | 1.87E-06 | 0.06999896  |
| P00352 | ALDH1A1 | 48 | 18    | 8.5   | 10.1  | 182   | 191.5 | 189.9 | 0.10  | 0.04  | 0.05  | 0.07  | 1.87E-06 | 0.06999896  |

|        |          |    |       |       |       |       |       |       |       |       |      |       |          |             |
|--------|----------|----|-------|-------|-------|-------|-------|-------|-------|-------|------|-------|----------|-------------|
| P13987 | CD59     | 3  | 125.4 | 128.2 | 125.7 | 74.6  | 71.8  | 74.3  | 1.68  | 1.79  | 1.69 | 1.72  | 1.90E-06 | 0.070642933 |
| Q9UNI6 | DUSP12   | 8  | 80.5  | 81    | 82.6  | 119.5 | 119   | 117.4 | 0.67  | 0.68  | 0.70 | 0.69  | 1.99E-06 | 0.072488899 |
| O95163 | IKBKAP   | 14 | 141.5 | 146.7 | 144.2 | 58.5  | 53.3  | 55.8  | 2.42  | 2.75  | 2.58 | 2.59  | 2.00E-06 | 0.072488899 |
| P22033 | MUT      | 7  | 134.5 | 130.8 | 133.7 | 65.5  | 69.2  | 66.3  | 2.05  | 1.89  | 2.02 | 1.99  | 2.01E-06 | 0.072488899 |
| P52298 | NCBP2    | 4  | 147   | 142   | 143.3 | 53    | 58    | 56.7  | 2.77  | 2.45  | 2.53 | 2.58  | 1.99E-06 | 0.072488899 |
| Q9Y5S9 | RBM8A    | 3  | 163.6 | 162.8 | 157   | 36.4  | 37.2  | 43    | 4.49  | 4.38  | 3.65 | 4.17  | 2.00E-06 | 0.072488899 |
| P13645 | KRT10    | 27 | 182.8 | 189   | 179.2 | 17.2  | 11    | 20.8  | 10.63 | 17.18 | 8.62 | 12.14 | 2.05E-06 | 0.073298714 |
| P55196 | AFDN     | 41 | 173   | 164.8 | 168.2 | 27    | 35.2  | 31.8  | 6.41  | 4.68  | 5.29 | 5.46  | 2.15E-06 | 0.076468729 |
| P46379 | BAG6     | 31 | 160.6 | 155.5 | 162.4 | 39.4  | 44.5  | 37.6  | 4.08  | 3.49  | 4.32 | 3.96  | 2.17E-06 | 0.076468729 |
| Q9NQC3 | RTN4     | 16 | 118.1 | 120.4 | 119.1 | 81.9  | 79.6  | 80.9  | 1.44  | 1.51  | 1.47 | 1.48  | 2.16E-06 | 0.076468729 |
| P26447 | S100A4   | 6  | 8.2   | 2.3   | 13.4  | 191.8 | 197.7 | 186.6 | 0.04  | 0.01  | 0.07 | 0.04  | 2.20E-06 | 0.076982424 |
| Q9H2V7 | SPNS1    | 2  | 60.2  | 61.7  | 64.7  | 139.8 | 138.3 | 135.3 | 0.43  | 0.45  | 0.48 | 0.45  | 2.24E-06 | 0.077912605 |
| P08758 | ANXA5    | 28 | 82.5  | 83.6  | 84.5  | 117.5 | 116.4 | 115.5 | 0.70  | 0.72  | 0.73 | 0.72  | 2.27E-06 | 0.078550564 |
| Q7L014 | DDX46    | 27 | 118.9 | 117.6 | 119.9 | 81.1  | 82.4  | 80.1  | 1.47  | 1.43  | 1.50 | 1.46  | 2.35E-06 | 0.079822643 |
| O75044 | SRGAP2   | 3  | 151.3 | 148.7 | 155   | 48.7  | 51.3  | 45    | 3.11  | 2.90  | 3.44 | 3.15  | 2.34E-06 | 0.079822643 |
| Q96G46 | DUS3L    | 10 | 176.6 | 179.7 | 170.6 | 23.4  | 20.3  | 29.4  | 7.55  | 8.85  | 5.80 | 7.40  | 2.32E-06 | 0.079822643 |
| Q6P2Q9 | PRPF8    | 76 | 146.1 | 141   | 145.2 | 53.9  | 59    | 54.8  | 2.71  | 2.39  | 2.65 | 2.58  | 2.41E-06 | 0.081359907 |
| Q16658 | FSCN1    | 33 | 144.5 | 150.3 | 148.4 | 55.5  | 49.7  | 51.6  | 2.60  | 3.02  | 2.88 | 2.83  | 2.44E-06 | 0.082052817 |
| Q92823 | NRCAM    | 13 | 8.9   | 4.3   | 15.5  | 191.1 | 195.7 | 184.5 | 0.05  | 0.02  | 0.08 | 0.05  | 2.49E-06 | 0.083206117 |
| Q16531 | DDB1     | 44 | 148.9 | 143.4 | 147.9 | 51.1  | 56.6  | 52.1  | 2.91  | 2.53  | 2.84 | 2.76  | 2.56E-06 | 0.085084715 |
| P54727 | RAD23B   | 11 | 139.6 | 134.9 | 137   | 60.4  | 65.1  | 63    | 2.31  | 2.07  | 2.17 | 2.19  | 2.67E-06 | 0.088203851 |
| P52732 | KIF11    | 7  | 164.4 | 162   | 170.1 | 35.6  | 38    | 29.9  | 4.62  | 4.26  | 5.69 | 4.86  | 2.70E-06 | 0.088663615 |
| Q13523 | PRPF4B   | 8  | 162.1 | 170.5 | 167.6 | 37.9  | 29.5  | 32.4  | 4.28  | 5.78  | 5.17 | 5.08  | 2.77E-06 | 0.090011776 |
| P54578 | USP14    | 23 | 149.2 | 143.6 | 148.3 | 50.8  | 56.4  | 51.7  | 2.94  | 2.55  | 2.87 | 2.78  | 2.77E-06 | 0.090011776 |
| P11413 | G6PD     | 52 | 24.3  | 14.1  | 17.3  | 175.7 | 185.9 | 182.7 | 0.14  | 0.08  | 0.09 | 0.10  | 2.79E-06 | 0.090202707 |
| P52209 | PGD      | 30 | 34.8  | 29.8  | 38.2  | 165.2 | 170.2 | 161.8 | 0.21  | 0.18  | 0.24 | 0.21  | 2.83E-06 | 0.090324537 |
| P56945 | BCAR1    | 14 | 178   | 168.6 | 174.3 | 22    | 31.4  | 25.7  | 8.09  | 5.37  | 6.78 | 6.75  | 2.84E-06 | 0.090324537 |
| Q9Y450 | HBS1L    | 14 | 168.4 | 160.8 | 167.8 | 31.6  | 39.2  | 32.2  | 5.33  | 4.10  | 5.21 | 4.88  | 2.84E-06 | 0.090324537 |
| P50990 | CCT8     | 47 | 144   | 140.1 | 145.5 | 56    | 59.9  | 54.5  | 2.57  | 2.34  | 2.67 | 2.53  | 2.88E-06 | 0.090845137 |
| P23141 | CES1     | 29 | 6.4   | 15.3  | 16.9  | 193.6 | 184.7 | 183.1 | 0.03  | 0.08  | 0.09 | 0.07  | 2.95E-06 | 0.092617732 |
| Q8N3D4 | EHPIL1   | 20 | 143.1 | 139.4 | 144.8 | 56.9  | 60.6  | 55.2  | 2.51  | 2.30  | 2.62 | 2.48  | 2.97E-06 | 0.092934527 |
| Q9NTJ3 | SMC4     | 27 | 151.1 | 149.2 | 155.8 | 48.9  | 50.8  | 44.2  | 3.09  | 2.94  | 3.52 | 3.18  | 3.02E-06 | 0.093741845 |
| Q9NWS8 | RMND1    | 5  | 164.1 | 158.2 | 166.1 | 35.9  | 41.8  | 33.9  | 4.57  | 3.78  | 4.90 | 4.42  | 3.04E-06 | 0.093862183 |
| Q9UQ80 | PA2G4    | 29 | 139.4 | 139.3 | 144   | 60.6  | 60.7  | 56    | 2.30  | 2.29  | 2.57 | 2.39  | 3.08E-06 | 0.094794017 |
| Q08211 | DHX9     | 52 | 136.3 | 134   | 138.8 | 63.7  | 66    | 61.2  | 2.14  | 2.03  | 2.27 | 2.15  | 3.15E-06 | 0.095895896 |
| P07900 | HSP90AA1 | 47 | 155.6 | 149.3 | 155.2 | 44.4  | 50.7  | 44.8  | 3.50  | 2.94  | 3.46 | 3.30  | 3.17E-06 | 0.095895896 |
| O95347 | SMC2     | 36 | 159.3 | 154.3 | 161.9 | 40.7  | 45.7  | 38.1  | 3.91  | 3.38  | 4.25 | 3.85  | 3.15E-06 | 0.095895896 |
| Q9UBU9 | NXF1     | 7  | 135.6 | 131.4 | 132.4 | 64.4  | 68.6  | 67.6  | 2.11  | 1.92  | 1.96 | 1.99  | 3.19E-06 | 0.096072251 |
| P11021 | HSPA5    | 51 | 150.1 | 144.7 | 150.5 | 49.9  | 55.3  | 49.5  | 3.01  | 2.62  | 3.04 | 2.89  | 3.32E-06 | 0.09835574  |
| P48960 | CD97     | 6  | 169.3 | 161.6 | 169.4 | 30.7  | 38.4  | 30.6  | 5.51  | 4.21  | 5.54 | 5.09  | 3.35E-06 | 0.09835574  |
| Q9Y4L1 | HYOU1    | 50 | 142.8 | 139.3 | 144.9 | 57.2  | 60.7  | 55.1  | 2.50  | 2.29  | 2.63 | 2.47  | 3.31E-06 | 0.09835574  |

|        |         |     |       |       |       |       |       |       |       |       |       |       |          |             |
|--------|---------|-----|-------|-------|-------|-------|-------|-------|-------|-------|-------|-------|----------|-------------|
| Q7Z5L9 | IRF2BP2 | 6   | 69.7  | 68.5  | 72.4  | 130.3 | 131.5 | 127.6 | 0.53  | 0.52  | 0.57  | 0.54  | 3.35E-06 | 0.09835574  |
| P10253 | GAA     | 13  | 31.4  | 28.4  | 37.3  | 168.6 | 171.6 | 162.7 | 0.19  | 0.17  | 0.23  | 0.19  | 3.33E-06 | 0.09835574  |
| P08174 | CD55    | 5   | 14.4  | 24.7  | 16.2  | 185.6 | 175.3 | 183.8 | 0.08  | 0.14  | 0.09  | 0.10  | 3.43E-06 | 0.100301812 |
| Q14204 | DYNC1H1 | 167 | 143.4 | 138.6 | 143.6 | 56.6  | 61.4  | 56.4  | 2.53  | 2.26  | 2.55  | 2.45  | 3.47E-06 | 0.100376899 |
| Q9NRX5 | SERINC1 | 2   | 148.9 | 154.5 | 148.3 | 51.1  | 45.5  | 51.7  | 2.91  | 3.40  | 2.87  | 3.06  | 3.47E-06 | 0.100376899 |
| Q16540 | MRPL23  | 2   | 120.5 | 122.7 | 120   | 79.5  | 77.3  | 80    | 1.52  | 1.59  | 1.50  | 1.53  | 3.58E-06 | 0.102211011 |
| P46063 | RECQL   | 12  | 153.8 | 150.4 | 157.8 | 46.2  | 49.6  | 42.2  | 3.33  | 3.03  | 3.74  | 3.37  | 3.67E-06 | 0.102211011 |
| O75976 | CPD     | 29  | 64.1  | 63    | 67.6  | 135.9 | 137   | 132.4 | 0.47  | 0.46  | 0.51  | 0.48  | 3.64E-06 | 0.102211011 |
| Q9H223 | EHD4    | 11  | 159.4 | 155.6 | 151.8 | 40.6  | 44.4  | 48.2  | 3.93  | 3.50  | 3.15  | 3.53  | 3.62E-06 | 0.102211011 |
| Q9Y262 | EIF3L   | 12  | 133.2 | 129.5 | 133.4 | 66.8  | 70.5  | 66.6  | 1.99  | 1.84  | 2.00  | 1.94  | 3.66E-06 | 0.102211011 |
| P08648 | ITGA5   | 11  | 139   | 141.9 | 144.7 | 61    | 58.1  | 55.3  | 2.28  | 2.44  | 2.62  | 2.45  | 3.56E-06 | 0.102211011 |
| P61326 | MAGOH   | 8   | 167.5 | 161   | 159.4 | 32.5  | 39    | 40.6  | 5.15  | 4.13  | 3.93  | 4.40  | 3.65E-06 | 0.102211011 |
| Q9HCE1 | MOV10   | 12  | 186.3 | 175.5 | 183.3 | 13.7  | 24.5  | 16.7  | 13.60 | 7.16  | 10.98 | 10.58 | 3.59E-06 | 0.102211011 |
| O43390 | HNRNPR  | 23  | 148.2 | 143   | 149   | 51.8  | 57    | 51    | 2.86  | 2.51  | 2.92  | 2.76  | 3.91E-06 | 0.106986934 |
| Q13438 | OS9     | 6   | 154.7 | 147.8 | 153.1 | 45.3  | 52.2  | 46.9  | 3.42  | 2.83  | 3.26  | 3.17  | 3.90E-06 | 0.106986934 |
| Q15428 | SF3A2   | 9   | 144.4 | 139.3 | 144.5 | 55.6  | 60.7  | 55.5  | 2.60  | 2.29  | 2.60  | 2.50  | 3.89E-06 | 0.106986934 |
| Q8TAQ2 | SMARCC2 | 28  | 147   | 141.1 | 142.8 | 53    | 58.9  | 57.2  | 2.77  | 2.40  | 2.50  | 2.56  | 3.89E-06 | 0.106986934 |
| O14979 | HNRNPDI | 9   | 131.4 | 132.8 | 128.5 | 68.6  | 67.2  | 71.5  | 1.92  | 1.98  | 1.80  | 1.90  | 4.21E-06 | 0.113989736 |
| P61457 | PCBD1   | 5   | 50.6  | 45.9  | 52.9  | 149.4 | 154.1 | 147.1 | 0.34  | 0.30  | 0.36  | 0.33  | 4.23E-06 | 0.113989736 |
| Q99598 | TSNAX   | 16  | 87.1  | 88.2  | 86.4  | 112.9 | 111.8 | 113.6 | 0.77  | 0.79  | 0.76  | 0.77  | 4.23E-06 | 0.113989736 |
| Q8IWZ3 | ANKHD1  | 9   | 130.5 | 134   | 135   | 69.5  | 66    | 65    | 1.88  | 2.03  | 2.08  | 1.99  | 4.27E-06 | 0.114212604 |
| Q8IX12 | CCAR1   | 28  | 147.7 | 141.7 | 146.8 | 52.3  | 58.3  | 53.2  | 2.82  | 2.43  | 2.76  | 2.67  | 4.28E-06 | 0.114212604 |
| Q14157 | UBAP2L  | 21  | 138.4 | 138.1 | 143.2 | 61.6  | 61.9  | 56.8  | 2.25  | 2.23  | 2.52  | 2.33  | 4.39E-06 | 0.116605639 |
| Q86TU7 | SETD3   | 5   | 179.5 | 185.6 | 191.8 | 20.5  | 14.4  | 8.2   | 8.76  | 12.89 | 23.39 | 15.01 | 4.41E-06 | 0.11664406  |
| Q9Y2W1 | THRAP3  | 11  | 162.5 | 156.1 | 164.5 | 37.5  | 43.9  | 35.5  | 4.33  | 3.56  | 4.63  | 4.17  | 4.43E-06 | 0.11664406  |
| Q8N543 | OGFOD1  | 3   | 138.4 | 140.3 | 134.9 | 61.6  | 59.7  | 65.1  | 2.25  | 2.35  | 2.07  | 2.22  | 4.54E-06 | 0.118492463 |
| O95361 | TRIM16  | 8   | 18.5  | 11.1  | 22.9  | 181.5 | 188.9 | 177.1 | 0.10  | 0.06  | 0.13  | 0.10  | 4.52E-06 | 0.118492463 |
| Q6P1L8 | MRPL14  | 2   | 121.8 | 123.2 | 125.2 | 78.2  | 76.8  | 74.8  | 1.56  | 1.60  | 1.67  | 1.61  | 4.71E-06 | 0.119823951 |
| Q9Y5K6 | CD2AP   | 19  | 151   | 156.8 | 149.6 | 49    | 43.2  | 50.4  | 3.08  | 3.63  | 2.97  | 3.23  | 4.64E-06 | 0.119823951 |
| O43169 | CYB5B   | 8   | 53.7  | 59.6  | 54.4  | 146.3 | 140.4 | 145.6 | 0.37  | 0.42  | 0.37  | 0.39  | 4.73E-06 | 0.119823951 |
| Q14152 | EIF3A   | 59  | 133.8 | 130.5 | 135.2 | 66.2  | 69.5  | 64.8  | 2.02  | 1.88  | 2.09  | 2.00  | 4.64E-06 | 0.119823951 |
| Q16543 | CDC37   | 28  | 170   | 161.1 | 162.8 | 30    | 38.9  | 37.2  | 5.67  | 4.14  | 4.38  | 4.73  | 4.73E-06 | 0.119823951 |
| P42224 | STAT1   | 25  | 5.6   | 12.4  | 18.4  | 194.4 | 187.6 | 181.6 | 0.03  | 0.07  | 0.10  | 0.07  | 4.68E-06 | 0.119823951 |
| Q12874 | SF3A3   | 12  | 140.7 | 136.4 | 135.6 | 59.3  | 63.6  | 64.4  | 2.37  | 2.14  | 2.11  | 2.21  | 4.71E-06 | 0.119823951 |
| P35637 | FUS     | 9   | 151   | 144.2 | 149.2 | 49    | 55.8  | 50.8  | 3.08  | 2.58  | 2.94  | 2.87  | 4.76E-06 | 0.11994167  |
| Q92620 | DHX38   | 17  | 156.4 | 165.2 | 162.5 | 43.6  | 34.8  | 37.5  | 3.59  | 4.75  | 4.33  | 4.22  | 4.83E-06 | 0.121159693 |
| Q9UBC2 | EPS15L1 | 9   | 131.1 | 135.4 | 131.4 | 68.9  | 64.6  | 68.6  | 1.90  | 2.10  | 1.92  | 1.97  | 4.85E-06 | 0.121322356 |
| P14625 | HSP90B1 | 63  | 142.6 | 137.1 | 141.9 | 57.4  | 62.9  | 58.1  | 2.48  | 2.18  | 2.44  | 2.37  | 4.93E-06 | 0.122761944 |
| P48634 | PRRC2A  | 21  | 165.3 | 175.6 | 169.4 | 34.7  | 24.4  | 30.6  | 4.76  | 7.20  | 5.54  | 5.83  | 4.96E-06 | 0.122981337 |
| Q5PRF9 | SAMD4B  | 9   | 165.4 | 171.8 | 162.1 | 34.6  | 28.2  | 37.9  | 4.78  | 6.09  | 4.28  | 5.05  | 5.03E-06 | 0.123698178 |
| P17987 | TCP1    | 29  | 146.4 | 143.8 | 150.7 | 53.6  | 56.2  | 49.3  | 2.73  | 2.56  | 3.06  | 2.78  | 5.02E-06 | 0.123698178 |

|        |         |    |       |       |       |       |       |       |        |       |        |        |          |             |
|--------|---------|----|-------|-------|-------|-------|-------|-------|--------|-------|--------|--------|----------|-------------|
| Q9UNF1 | MAGED2  | 19 | 157.1 | 155   | 163.4 | 42.9  | 45    | 36.6  | 3.66   | 3.44  | 4.46   | 3.86   | 5.16E-06 | 0.12644768  |
| O76094 | SRP72   | 18 | 114.9 | 114.5 | 112.9 | 85.1  | 85.5  | 87.1  | 1.35   | 1.34  | 1.30   | 1.33   | 5.26E-06 | 0.128157186 |
| O60216 | RAD21   | 11 | 158.1 | 154.5 | 163.3 | 41.9  | 45.5  | 36.7  | 3.77   | 3.40  | 4.45   | 3.87   | 5.37E-06 | 0.129812515 |
| Q9UHN6 | TMEM2   | 11 | 26.6  | 19    | 14.7  | 173.4 | 181   | 185.3 | 0.15   | 0.10  | 0.08   | 0.11   | 5.36E-06 | 0.129812515 |
| P84095 | RHOG    | 7  | 73.2  | 73.8  | 69.9  | 126.8 | 126.2 | 130.1 | 0.58   | 0.58  | 0.54   | 0.57   | 5.47E-06 | 0.131738855 |
| P30048 | PRDX3   | 9  | 65.2  | 67.2  | 61.9  | 134.8 | 132.8 | 138.1 | 0.48   | 0.51  | 0.45   | 0.48   | 5.51E-06 | 0.13224641  |
| Q7Z4V5 | HDGFRP2 | 10 | 150.8 | 148   | 155.8 | 49.2  | 52    | 44.2  | 3.07   | 2.85  | 3.52   | 3.15   | 5.72E-06 | 0.136705347 |
| O43242 | PSMD3   | 15 | 126.5 | 123.6 | 127.4 | 73.5  | 76.4  | 72.6  | 1.72   | 1.62  | 1.75   | 1.70   | 5.78E-06 | 0.137523297 |
| P63241 | EIF5A   | 11 | 117.8 | 120.1 | 117.5 | 82.2  | 79.9  | 82.5  | 1.43   | 1.50  | 1.42   | 1.45   | 5.83E-06 | 0.137542783 |
| Q13126 | MTAP    | 13 | 199.7 | 186.6 | 198.8 | 0.3   | 13.4  | 1.2   | 665.67 | 13.93 | 165.67 | 281.75 | 5.82E-06 | 0.137542783 |
| P29317 | EPHA2   | 12 | 161.1 | 156.9 | 166.4 | 38.9  | 43.1  | 33.6  | 4.14   | 3.64  | 4.95   | 4.24   | 5.96E-06 | 0.138402783 |
| P55060 | CSE1L   | 36 | 135.8 | 137.3 | 141.5 | 64.2  | 62.7  | 58.5  | 2.12   | 2.19  | 2.42   | 2.24   | 5.93E-06 | 0.138402783 |
| Q01844 | EWSR1   | 7  | 128.1 | 125.7 | 124.1 | 71.9  | 74.3  | 75.9  | 1.78   | 1.69  | 1.64   | 1.70   | 5.98E-06 | 0.138402783 |
| P11169 | SLC2A3  | 5  | 168.7 | 158.9 | 163   | 31.3  | 41.1  | 37    | 5.39   | 3.87  | 4.41   | 4.55   | 5.96E-06 | 0.138402783 |
| Q13586 | STIM1   | 7  | 60.2  | 54.8  | 54    | 139.8 | 145.2 | 146   | 0.43   | 0.38  | 0.37   | 0.39   | 5.89E-06 | 0.138402783 |
| Q8TF05 | PPP4R1  | 8  | 161.5 | 154.5 | 163.3 | 38.5  | 45.5  | 36.7  | 4.19   | 3.40  | 4.45   | 4.01   | 6.06E-06 | 0.139658394 |
| Q15643 | TRIP11  | 31 | 154.1 | 149.6 | 158   | 45.9  | 50.4  | 42    | 3.36   | 2.97  | 3.76   | 3.36   | 6.12E-06 | 0.140560337 |
| Q12906 | ILF3    | 33 | 158.8 | 151.1 | 158.6 | 41.2  | 48.9  | 41.4  | 3.85   | 3.09  | 3.83   | 3.59   | 6.17E-06 | 0.140858266 |
| P11498 | PC      | 23 | 61.1  | 56.6  | 62.6  | 138.9 | 143.4 | 137.4 | 0.44   | 0.39  | 0.46   | 0.43   | 6.21E-06 | 0.140858266 |
| Q9UGP8 | SEC63   | 12 | 152.2 | 149.9 | 158   | 47.8  | 50.1  | 42    | 3.18   | 2.99  | 3.76   | 3.31   | 6.20E-06 | 0.140858266 |
| Q9C0J8 | WDR33   | 13 | 174.1 | 163.7 | 172.1 | 25.9  | 36.3  | 27.9  | 6.72   | 4.51  | 6.17   | 5.80   | 6.41E-06 | 0.144205715 |
| O15498 | YKT6    | 12 | 124.6 | 122   | 125.7 | 75.4  | 78    | 74.3  | 1.65   | 1.56  | 1.69   | 1.64   | 6.39E-06 | 0.144205715 |
| Q99613 | EIF3C   | 31 | 139.7 | 134   | 136   | 60.3  | 66    | 64    | 2.32   | 2.03  | 2.13   | 2.16   | 6.48E-06 | 0.144739866 |
| P26038 | MSN     | 52 | 138.6 | 133.5 | 138.5 | 61.4  | 66.5  | 61.5  | 2.26   | 2.01  | 2.25   | 2.17   | 6.48E-06 | 0.144739866 |
| Q92945 | KHSRP   | 32 | 137.5 | 132   | 135.4 | 62.5  | 68    | 64.6  | 2.20   | 1.94  | 2.10   | 2.08   | 6.57E-06 | 0.146223217 |
| P25325 | MPST    | 13 | 67.6  | 66.2  | 71.1  | 132.4 | 133.8 | 128.9 | 0.51   | 0.49  | 0.55   | 0.52   | 6.65E-06 | 0.146899885 |
| Q9BUJ2 | HNRNPUI | 29 | 138   | 132.4 | 135.2 | 62    | 67.6  | 64.8  | 2.23   | 1.96  | 2.09   | 2.09   | 6.63E-06 | 0.146899885 |
| Q96N67 | DOCK7   | 13 | 164.3 | 157.9 | 167.9 | 35.7  | 42.1  | 32.1  | 4.60   | 3.75  | 5.23   | 4.53   | 6.75E-06 | 0.148651817 |
| P83731 | RPL24   | 12 | 123.7 | 121.3 | 125   | 76.3  | 78.7  | 75    | 1.62   | 1.54  | 1.67   | 1.61   | 6.93E-06 | 0.150878151 |
| P27797 | CALR    | 26 | 137.9 | 133.2 | 138.6 | 62.1  | 66.8  | 61.4  | 2.22   | 1.99  | 2.26   | 2.16   | 6.88E-06 | 0.150878151 |
| P47813 | EIF1AX  | 7  | 134   | 130.3 | 135.5 | 66    | 69.7  | 64.5  | 2.03   | 1.87  | 2.10   | 2.00   | 6.93E-06 | 0.150878151 |
| P62750 | RPL23A  | 15 | 127.3 | 123.7 | 127.4 | 72.7  | 76.3  | 72.6  | 1.75   | 1.62  | 1.75   | 1.71   | 7.00E-06 | 0.151862397 |
| Q04917 | YWHAH   | 19 | 91.1  | 90.6  | 92    | 108.9 | 109.4 | 108   | 0.84   | 0.83  | 0.85   | 0.84   | 7.10E-06 | 0.153307986 |
| Q15942 | ZYX     | 12 | 145.5 | 140.7 | 147.8 | 54.5  | 59.3  | 52.2  | 2.67   | 2.37  | 2.83   | 2.62   | 7.16E-06 | 0.154077081 |
| Q92804 | TAF15   | 6  | 119   | 117.8 | 120.9 | 81    | 82.2  | 79.1  | 1.47   | 1.43  | 1.53   | 1.48   | 7.22E-06 | 0.154785432 |
| Q13310 | PABPC4  | 18 | 162.4 | 158   | 168.2 | 37.6  | 42    | 31.8  | 4.32   | 3.76  | 5.29   | 4.46   | 7.26E-06 | 0.155034627 |
| P08195 | SLC3A2  | 22 | 43.4  | 33.7  | 35.9  | 156.6 | 166.3 | 164.1 | 0.28   | 0.20  | 0.22   | 0.23   | 7.33E-06 | 0.156058426 |
| Q9UHQ4 | BCAP29  | 7  | 143.6 | 141.5 | 148.6 | 56.4  | 58.5  | 51.4  | 2.55   | 2.42  | 2.89   | 2.62   | 7.42E-06 | 0.15686438  |
| P49023 | PXN     | 13 | 167.6 | 169.5 | 178.6 | 32.4  | 30.5  | 21.4  | 5.17   | 5.56  | 8.35   | 6.36   | 7.40E-06 | 0.15686438  |
| Q9BTE3 | MCMBP   | 13 | 159.6 | 151.1 | 158.6 | 40.4  | 48.9  | 41.4  | 3.95   | 3.09  | 3.83   | 3.62   | 7.60E-06 | 0.160007651 |
| Q6L8Q7 | PDE12   | 10 | 141.6 | 136.6 | 142.9 | 58.4  | 63.4  | 57.1  | 2.42   | 2.15  | 2.50   | 2.36   | 7.63E-06 | 0.160017392 |

|        |         |    |       |       |       |       |       |       |      |       |      |       |          |             |
|--------|---------|----|-------|-------|-------|-------|-------|-------|------|-------|------|-------|----------|-------------|
| P02751 | FN1     | 17 | 34.5  | 23    | 30.5  | 165.5 | 177   | 169.5 | 0.21 | 0.13  | 0.18 | 0.17  | 7.71E-06 | 0.160547761 |
| P46087 | NOP2    | 15 | 162.9 | 154.4 | 155   | 37.1  | 45.6  | 45    | 4.39 | 3.39  | 3.44 | 3.74  | 7.70E-06 | 0.160547761 |
| Q96RN5 | MED15   | 2  | 152.7 | 145.8 | 145.8 | 47.3  | 54.2  | 54.2  | 3.23 | 2.69  | 2.69 | 2.87  | 7.78E-06 | 0.161583987 |
| P83881 | RPL36A  | 1  | 138.6 | 133.1 | 138.1 | 61.4  | 66.9  | 61.9  | 2.26 | 1.99  | 2.23 | 2.16  | 7.89E-06 | 0.161872855 |
| O43432 | EIF4G3  | 9  | 146.7 | 139.6 | 144.4 | 53.3  | 60.4  | 55.6  | 2.75 | 2.31  | 2.60 | 2.55  | 7.91E-06 | 0.161872855 |
| Q9BS40 | LXN     | 5  | 31.1  | 22.7  | 34    | 168.9 | 177.3 | 166   | 0.18 | 0.13  | 0.20 | 0.17  | 7.84E-06 | 0.161872855 |
| Q9NX40 | OCIAD1  | 14 | 151.2 | 144.4 | 151.7 | 48.8  | 55.6  | 48.3  | 3.10 | 2.60  | 3.14 | 2.95  | 7.87E-06 | 0.161872855 |
| P33993 | MCM7    | 30 | 147.4 | 140.1 | 144.2 | 52.6  | 59.9  | 55.8  | 2.80 | 2.34  | 2.58 | 2.58  | 7.98E-06 | 0.162540662 |
| Q14C86 | GAPVD1  | 21 | 157.7 | 164.3 | 154.7 | 42.3  | 35.7  | 45.3  | 3.73 | 4.60  | 3.42 | 3.92  | 7.99E-06 | 0.162540662 |
| Q96I24 | FUBP3   | 16 | 157.2 | 149.2 | 150.2 | 42.8  | 50.8  | 49.8  | 3.67 | 2.94  | 3.02 | 3.21  | 8.04E-06 | 0.162683989 |
| Q15046 | KARS    | 27 | 138.8 | 137.2 | 143.6 | 61.2  | 62.8  | 56.4  | 2.27 | 2.18  | 2.55 | 2.33  | 8.06E-06 | 0.162683989 |
| P04062 | GBA     | 9  | 63.1  | 56.7  | 57.8  | 136.9 | 143.3 | 142.2 | 0.46 | 0.40  | 0.41 | 0.42  | 8.18E-06 | 0.164109069 |
| Q969H8 | MYDGF   | 4  | 132.1 | 127.8 | 127.9 | 67.9  | 72.2  | 72.1  | 1.95 | 1.77  | 1.77 | 1.83  | 8.18E-06 | 0.164109069 |
| P23786 | CPT2    | 7  | 115   | 116   | 117.7 | 85    | 84    | 82.3  | 1.35 | 1.38  | 1.43 | 1.39  | 8.27E-06 | 0.164522096 |
| Q16555 | DPYSL2  | 25 | 55.1  | 48    | 54.7  | 144.9 | 152   | 145.3 | 0.38 | 0.32  | 0.38 | 0.36  | 8.29E-06 | 0.164522096 |
| Q96TA1 | FAM129B | 26 | 138.8 | 135.4 | 141.9 | 61.2  | 64.6  | 58.1  | 2.27 | 2.10  | 2.44 | 2.27  | 8.24E-06 | 0.164522096 |
| Q9BRA2 | TXNDC17 | 4  | 66.5  | 60.7  | 61.6  | 133.5 | 139.3 | 138.4 | 0.50 | 0.44  | 0.45 | 0.46  | 8.32E-06 | 0.164522096 |
| P47756 | CAPZB   | 19 | 121.9 | 118.5 | 120.6 | 78.1  | 81.5  | 79.4  | 1.56 | 1.45  | 1.52 | 1.51  | 8.38E-06 | 0.165239848 |
| O43707 | ACTN4   | 48 | 140.2 | 134.9 | 140.9 | 59.8  | 65.1  | 59.1  | 2.34 | 2.07  | 2.38 | 2.27  | 8.57E-06 | 0.167421638 |
| Q92598 | HSPH1   | 42 | 136.5 | 132.9 | 139   | 63.5  | 67.1  | 61    | 2.15 | 1.98  | 2.28 | 2.14  | 8.58E-06 | 0.167421638 |
| Q969E2 | SCAMP4  | 2  | 118   | 115.3 | 117.5 | 82    | 84.7  | 82.5  | 1.44 | 1.36  | 1.42 | 1.41  | 8.56E-06 | 0.167421638 |
| P11216 | PYGB    | 47 | 69.7  | 64.5  | 68.7  | 130.3 | 135.5 | 131.3 | 0.53 | 0.48  | 0.52 | 0.51  | 8.73E-06 | 0.169889314 |
| Q12792 | TWF1    | 10 | 159.1 | 170.1 | 166.5 | 40.9  | 29.9  | 33.5  | 3.89 | 5.69  | 4.97 | 4.85  | 9.03E-06 | 0.175133044 |
| Q9Y3B2 | EXOSC1  | 5  | 147.5 | 140.7 | 147.4 | 52.5  | 59.3  | 52.6  | 2.81 | 2.37  | 2.80 | 2.66  | 9.14E-06 | 0.176613113 |
| O95292 | VAPB    | 12 | 73    | 70.2  | 74.9  | 127   | 129.8 | 125.1 | 0.57 | 0.54  | 0.60 | 0.57  | 9.30E-06 | 0.179133364 |
| P53618 | COPB1   | 20 | 119.7 | 122.2 | 123.4 | 80.3  | 77.8  | 76.6  | 1.49 | 1.57  | 1.61 | 1.56  | 9.35E-06 | 0.179521807 |
| Q93052 | LPP     | 17 | 61.4  | 59.1  | 65.6  | 138.6 | 140.9 | 134.4 | 0.44 | 0.42  | 0.49 | 0.45  | 9.39E-06 | 0.179665226 |
| Q99832 | CCT7    | 35 | 135.2 | 139.2 | 141.9 | 64.8  | 60.8  | 58.1  | 2.09 | 2.29  | 2.44 | 2.27  | 9.45E-06 | 0.180260705 |
| Q05193 | DNM1    | 6  | 23.8  | 17.2  | 30.5  | 176.2 | 182.8 | 169.5 | 0.14 | 0.09  | 0.18 | 0.14  | 9.60E-06 | 0.182611928 |
| Q9H3P2 | NELFA   | 5  | 173.8 | 187.9 | 180.3 | 26.2  | 12.1  | 19.7  | 6.63 | 15.53 | 9.15 | 10.44 | 9.68E-06 | 0.183488304 |
| P62829 | RPL23   | 8  | 137.2 | 133.6 | 140.1 | 62.8  | 66.4  | 59.9  | 2.18 | 2.01  | 2.34 | 2.18  | 9.95E-06 | 0.187958627 |
| Q13283 | G3BP1   | 14 | 136.8 | 140   | 143.9 | 63.2  | 60    | 56.1  | 2.16 | 2.33  | 2.57 | 2.35  | 1.01E-05 | 0.189836111 |
| O00203 | AP3B1   | 9  | 129.5 | 126.1 | 124.9 | 70.5  | 73.9  | 75.1  | 1.84 | 1.71  | 1.66 | 1.74  | 1.03E-05 | 0.193291649 |
| P27816 | MAP4    | 64 | 134.1 | 134.4 | 139.8 | 65.9  | 65.6  | 60.2  | 2.03 | 2.05  | 2.32 | 2.14  | 1.03E-05 | 0.193291649 |
| Q9BSJ8 | ESYT1   | 41 | 140.6 | 134.4 | 140   | 59.4  | 65.6  | 60    | 2.37 | 2.05  | 2.33 | 2.25  | 1.05E-05 | 0.195138746 |
| Q96RT1 | ERBIN   | 14 | 154.5 | 147.4 | 156.4 | 45.5  | 52.6  | 43.6  | 3.40 | 2.80  | 3.59 | 3.26  | 1.08E-05 | 0.20062819  |
| P48643 | CCT5    | 38 | 153.9 | 145   | 149.2 | 46.1  | 55    | 50.8  | 3.34 | 2.64  | 2.94 | 2.97  | 1.09E-05 | 0.202561979 |
| P62191 | PSMC1   | 16 | 158.4 | 150.1 | 159.3 | 41.6  | 49.9  | 40.7  | 3.81 | 3.01  | 3.91 | 3.58  | 1.12E-05 | 0.205053952 |
| P55884 | EIF3B   | 34 | 143.8 | 141.6 | 149.5 | 56.2  | 58.4  | 50.5  | 2.56 | 2.42  | 2.96 | 2.65  | 1.12E-05 | 0.205053952 |
| Q00653 | NFKB2   | 16 | 148.7 | 141   | 142.9 | 51.3  | 59    | 57.1  | 2.90 | 2.39  | 2.50 | 2.60  | 1.12E-05 | 0.205053952 |
| Q13435 | SF3B2   | 36 | 139.2 | 132.9 | 137.9 | 60.8  | 67.1  | 62.1  | 2.29 | 1.98  | 2.22 | 2.16  | 1.12E-05 | 0.205053952 |

|        |          |    |       |       |       |       |       |       |       |      |       |       |          |             |
|--------|----------|----|-------|-------|-------|-------|-------|-------|-------|------|-------|-------|----------|-------------|
| Q9Y3F4 | STRAP    | 19 | 143.6 | 138.4 | 136.7 | 56.4  | 61.6  | 63.3  | 2.55  | 2.25 | 2.16  | 2.32  | 1.13E-05 | 0.205360248 |
| Q96DC9 | OTUB2    | 1  | 132.4 | 128.1 | 133.5 | 67.6  | 71.9  | 66.5  | 1.96  | 1.78 | 2.01  | 1.92  | 1.14E-05 | 0.206679575 |
| P18084 | ITGB5    | 17 | 45    | 49.5  | 54.2  | 155   | 150.5 | 145.8 | 0.29  | 0.33 | 0.37  | 0.33  | 1.14E-05 | 0.207329934 |
| Q9NS87 | KIF15    | 3  | 141.4 | 149.1 | 143   | 58.6  | 50.9  | 57    | 2.41  | 2.93 | 2.51  | 2.62  | 1.15E-05 | 0.207525861 |
| Q6ZUX7 | LHFPL2   | 1  | 39.5  | 40    | 48.8  | 160.5 | 160   | 151.2 | 0.25  | 0.25 | 0.32  | 0.27  | 1.15E-05 | 0.207691125 |
| P05198 | EIF2S1   | 26 | 131.7 | 137.1 | 131.8 | 68.3  | 62.9  | 68.2  | 1.93  | 2.18 | 1.93  | 2.01  | 1.19E-05 | 0.213252581 |
| Q53EP0 | FNDC3B   | 2  | 81.9  | 79.3  | 78.3  | 118.1 | 120.7 | 121.7 | 0.69  | 0.66 | 0.64  | 0.66  | 1.19E-05 | 0.213252581 |
| P15311 | EZR      | 44 | 145.6 | 139.8 | 147.7 | 54.4  | 60.2  | 52.3  | 2.68  | 2.32 | 2.82  | 2.61  | 1.19E-05 | 0.213344399 |
| P10620 | MGST1    | 5  | 16    | 26.9  | 12.4  | 184   | 173.1 | 187.6 | 0.09  | 0.16 | 0.07  | 0.10  | 1.21E-05 | 0.215787618 |
| Q14696 | MESDC2   | 9  | 45.3  | 49.3  | 39.1  | 154.7 | 150.7 | 160.9 | 0.29  | 0.33 | 0.24  | 0.29  | 1.22E-05 | 0.21609183  |
| Q96RK0 | CIC      | 10 | 150.1 | 141.6 | 146.7 | 49.9  | 58.4  | 53.3  | 3.01  | 2.42 | 2.75  | 2.73  | 1.22E-05 | 0.21609183  |
| Q9UHG3 | PCYOX1   | 17 | 46.8  | 47    | 55    | 153.2 | 153   | 145   | 0.31  | 0.31 | 0.38  | 0.33  | 1.22E-05 | 0.21612108  |
| P05787 | KRT8     | 24 | 25.2  | 35.2  | 36.8  | 174.8 | 164.8 | 163.2 | 0.14  | 0.21 | 0.23  | 0.19  | 1.23E-05 | 0.217196551 |
| P35908 | KRT2     | 26 | 191.5 | 176   | 186.2 | 8.5   | 24    | 13.8  | 22.53 | 7.33 | 13.49 | 14.45 | 1.24E-05 | 0.218055154 |
| P04040 | CAT      | 13 | 62    | 67.6  | 67.5  | 138   | 132.4 | 132.5 | 0.45  | 0.51 | 0.51  | 0.49  | 1.26E-05 | 0.219957344 |
| P35573 | AGL      | 39 | 137.6 | 131.4 | 133.2 | 62.4  | 68.6  | 66.8  | 2.21  | 1.92 | 1.99  | 2.04  | 1.27E-05 | 0.220341365 |
| Q96ST2 | IWS1     | 12 | 126.3 | 122.5 | 122.4 | 73.7  | 77.5  | 77.6  | 1.71  | 1.58 | 1.58  | 1.62  | 1.27E-05 | 0.220341365 |
| Q6VEQ5 | WASH2P   | 3  | 144   | 138.3 | 137   | 56    | 61.7  | 63    | 2.57  | 2.24 | 2.17  | 2.33  | 1.27E-05 | 0.220341365 |
| Q15003 | NCAPH    | 3  | 143.8 | 146.1 | 138.3 | 56.2  | 53.9  | 61.7  | 2.56  | 2.71 | 2.24  | 2.50  | 1.28E-05 | 0.220702136 |
| P05386 | RPLP1    | 2  | 120.5 | 121   | 124.3 | 79.5  | 79    | 75.7  | 1.52  | 1.53 | 1.64  | 1.56  | 1.30E-05 | 0.223344494 |
| O75400 | PRPF40A  | 13 | 154.8 | 148.6 | 158.7 | 45.2  | 51.4  | 41.3  | 3.42  | 2.89 | 3.84  | 3.39  | 1.30E-05 | 0.223880679 |
| Q9UN86 | G3BP2    | 8  | 130.1 | 133.9 | 128.2 | 69.9  | 66.1  | 71.8  | 1.86  | 2.03 | 1.79  | 1.89  | 1.31E-05 | 0.224831953 |
| O14976 | GAK      | 8  | 172.5 | 162.8 | 161   | 27.5  | 37.2  | 39    | 6.27  | 4.38 | 4.13  | 4.93  | 1.32E-05 | 0.225125531 |
| P63272 | SUPT4H1  | 1  | 153   | 155.6 | 163.5 | 47    | 44.4  | 36.5  | 3.26  | 3.50 | 4.48  | 3.75  | 1.36E-05 | 0.232019016 |
| Q07866 | KLC1     | 14 | 153.3 | 144.5 | 152.1 | 46.7  | 55.5  | 47.9  | 3.28  | 2.60 | 3.18  | 3.02  | 1.37E-05 | 0.233120668 |
| Q8WZA9 | IRGQ     | 8  | 149.5 | 155.3 | 160   | 50.5  | 44.7  | 40    | 2.96  | 3.47 | 4.00  | 3.48  | 1.39E-05 | 0.234768071 |
| Q99798 | ACO2     | 29 | 119.7 | 123.8 | 121.2 | 80.3  | 76.2  | 78.8  | 1.49  | 1.62 | 1.54  | 1.55  | 1.41E-05 | 0.236743791 |
| P14923 | JUP      | 21 | 32.1  | 29    | 41.2  | 167.9 | 171   | 158.8 | 0.19  | 0.17 | 0.26  | 0.21  | 1.41E-05 | 0.236743791 |
| O00469 | PLOD2    | 17 | 51.8  | 46.7  | 56    | 148.2 | 153.3 | 144   | 0.35  | 0.30 | 0.39  | 0.35  | 1.40E-05 | 0.236743791 |
| O76024 | WFS1     | 4  | 161.7 | 159.5 | 171.1 | 38.3  | 40.5  | 28.9  | 4.22  | 3.94 | 5.92  | 4.69  | 1.41E-05 | 0.236743791 |
| P35269 | GTF2F1   | 9  | 151.2 | 144.9 | 142.6 | 48.8  | 55.1  | 57.4  | 3.10  | 2.63 | 2.48  | 2.74  | 1.42E-05 | 0.236832832 |
| P53999 | SUB1     | 11 | 132.6 | 127.8 | 127.6 | 67.4  | 72.2  | 72.4  | 1.97  | 1.77 | 1.76  | 1.83  | 1.43E-05 | 0.238143837 |
| P49321 | NASP     | 36 | 149.1 | 143.3 | 152.6 | 50.9  | 56.7  | 47.4  | 2.93  | 2.53 | 3.22  | 2.89  | 1.47E-05 | 0.244186838 |
| Q14683 | SMC1A    | 31 | 156   | 148.8 | 159.2 | 44    | 51.2  | 40.8  | 3.55  | 2.91 | 3.90  | 3.45  | 1.49E-05 | 0.246064136 |
| P02545 | LMNA     | 50 | 139.1 | 133.2 | 139.9 | 60.9  | 66.8  | 60.1  | 2.28  | 1.99 | 2.33  | 2.20  | 1.51E-05 | 0.248722598 |
| P49368 | CCT3     | 39 | 147   | 139   | 145.7 | 53    | 61    | 54.3  | 2.77  | 2.28 | 2.68  | 2.58  | 1.51E-05 | 0.248722598 |
| O14617 | AP3D1    | 8  | 145.2 | 138.8 | 147   | 54.8  | 61.2  | 53    | 2.65  | 2.27 | 2.77  | 2.56  | 1.56E-05 | 0.255331985 |
| P13073 | COX4I1   | 10 | 124.5 | 120.9 | 120.6 | 75.5  | 79.1  | 79.4  | 1.65  | 1.53 | 1.52  | 1.57  | 1.56E-05 | 0.255331985 |
| O14974 | PPP1R12A | 30 | 169.6 | 157.1 | 163.3 | 30.4  | 42.9  | 36.7  | 5.58  | 3.66 | 4.45  | 4.56  | 1.56E-05 | 0.255331985 |
| P60842 | EIF4A1   | 18 | 126.6 | 124.5 | 129.8 | 73.4  | 75.5  | 70.2  | 1.72  | 1.65 | 1.85  | 1.74  | 1.58E-05 | 0.25643668  |
| P56192 | MARS     | 26 | 140.8 | 134.1 | 140.6 | 59.2  | 65.9  | 59.4  | 2.38  | 2.03 | 2.37  | 2.26  | 1.58E-05 | 0.25643668  |

|        |         |     |       |       |       |       |       |       |      |      |      |      |          |             |
|--------|---------|-----|-------|-------|-------|-------|-------|-------|------|------|------|------|----------|-------------|
| Q10472 | GALNT1  | 6   | 21.3  | 35.4  | 26.2  | 178.7 | 164.6 | 173.8 | 0.12 | 0.22 | 0.15 | 0.16 | 1.58E-05 | 0.25643668  |
| P55072 | VCP     | 80  | 127.3 | 124.1 | 129.4 | 72.7  | 75.9  | 70.6  | 1.75 | 1.64 | 1.83 | 1.74 | 1.59E-05 | 0.256622638 |
| Q9NW82 | WDR70   | 5   | 155.9 | 149.6 | 146   | 44.1  | 50.4  | 54    | 3.54 | 2.97 | 2.70 | 3.07 | 1.60E-05 | 0.257283943 |
| Q9UHQ9 | CYB5R1  | 10  | 67.2  | 72.7  | 71.7  | 132.8 | 127.3 | 128.3 | 0.51 | 0.57 | 0.56 | 0.55 | 1.61E-05 | 0.258622091 |
| P49736 | MCM2    | 29  | 146   | 138.2 | 139.8 | 54    | 61.8  | 60.2  | 2.70 | 2.24 | 2.32 | 2.42 | 1.63E-05 | 0.260496273 |
| O14735 | CDIPT   | 3   | 80.2  | 76.4  | 79.9  | 119.8 | 123.6 | 120.1 | 0.67 | 0.62 | 0.67 | 0.65 | 1.64E-05 | 0.261205858 |
| Q92616 | GCN1    | 108 | 127   | 122.8 | 127.5 | 73    | 77.2  | 72.5  | 1.74 | 1.59 | 1.76 | 1.70 | 1.66E-05 | 0.263902293 |
| P38159 | RBMX    | 19  | 154.2 | 161.1 | 166.3 | 45.8  | 38.9  | 33.7  | 3.37 | 4.14 | 4.93 | 4.15 | 1.67E-05 | 0.263902293 |
| P62316 | SNRPD2  | 9   | 141.7 | 147.2 | 138.8 | 58.3  | 52.8  | 61.2  | 2.43 | 2.79 | 2.27 | 2.50 | 1.66E-05 | 0.263902293 |
| Q14694 | USP10   | 9   | 156.2 | 150   | 161.2 | 43.8  | 50    | 38.8  | 3.57 | 3.00 | 4.15 | 3.57 | 1.68E-05 | 0.266097402 |
| P16070 | CD44    | 13  | 80.4  | 76.2  | 77    | 119.6 | 123.8 | 123   | 0.67 | 0.62 | 0.63 | 0.64 | 1.70E-05 | 0.266807139 |
| Q14203 | DCTN1   | 49  | 136.8 | 139.5 | 144.8 | 63.2  | 60.5  | 55.2  | 2.16 | 2.31 | 2.62 | 2.36 | 1.70E-05 | 0.266807139 |
| Q9H6S3 | EPS8L2  | 10  | 40.2  | 35.1  | 47    | 159.8 | 164.9 | 153   | 0.25 | 0.21 | 0.31 | 0.26 | 1.70E-05 | 0.266807139 |
| O60869 | EDF1    | 4   | 136.9 | 130.7 | 136.7 | 63.1  | 69.3  | 63.3  | 2.17 | 1.89 | 2.16 | 2.07 | 1.74E-05 | 0.271588422 |
| Q8N8S7 | ENAH    | 11  | 66.7  | 67.2  | 60.8  | 133.3 | 132.8 | 139.2 | 0.50 | 0.51 | 0.44 | 0.48 | 1.74E-05 | 0.271613332 |
| P61978 | HNRNPK  | 34  | 135.3 | 129.7 | 135.9 | 64.7  | 70.3  | 64.1  | 2.09 | 1.84 | 2.12 | 2.02 | 1.76E-05 | 0.273412345 |
| O95394 | PGM3    | 3   | 168.6 | 159.1 | 156.8 | 31.4  | 40.9  | 43.2  | 5.37 | 3.89 | 3.63 | 4.30 | 1.76E-05 | 0.273412345 |
| P13639 | EEF2    | 64  | 142.5 | 135.3 | 142.2 | 57.5  | 64.7  | 57.8  | 2.48 | 2.09 | 2.46 | 2.34 | 1.77E-05 | 0.273414106 |
| Q01469 | FABP5   | 15  | 163.1 | 155.9 | 168.6 | 36.9  | 44.1  | 31.4  | 4.42 | 3.54 | 5.37 | 4.44 | 1.77E-05 | 0.273414106 |
| Q12888 | TP53BP1 | 44  | 159   | 148.5 | 157.1 | 41    | 51.5  | 42.9  | 3.88 | 2.88 | 3.66 | 3.47 | 1.78E-05 | 0.27402883  |
| Q9UBW8 | COPS7A  | 10  | 146   | 137.6 | 143.7 | 54    | 62.4  | 56.3  | 2.70 | 2.21 | 2.55 | 2.49 | 1.80E-05 | 0.276080987 |
| O75369 | FLNB    | 145 | 67    | 61.1  | 67.5  | 133   | 138.9 | 132.5 | 0.50 | 0.44 | 0.51 | 0.48 | 1.80E-05 | 0.276080987 |
| O60841 | EIF5B   | 38  | 135.9 | 130.1 | 136.4 | 64.1  | 69.9  | 63.6  | 2.12 | 1.86 | 2.14 | 2.04 | 1.83E-05 | 0.278543698 |
| Q9UBB6 | NCDN    | 4   | 164.7 | 153   | 162.3 | 35.3  | 47    | 37.7  | 4.67 | 3.26 | 4.31 | 4.08 | 1.85E-05 | 0.281446306 |
| P07237 | P4HB    | 47  | 80.1  | 77.2  | 81.3  | 119.9 | 122.8 | 118.7 | 0.67 | 0.63 | 0.68 | 0.66 | 1.85E-05 | 0.281446306 |
| Q5UIP0 | RIF1    | 20  | 149.8 | 140.7 | 147.6 | 50.2  | 59.3  | 52.4  | 2.98 | 2.37 | 2.82 | 2.72 | 1.86E-05 | 0.282301166 |
| Q9NVJ2 | ARL8B   | 4   | 41.5  | 36.5  | 48.4  | 158.5 | 163.5 | 151.6 | 0.26 | 0.22 | 0.32 | 0.27 | 1.87E-05 | 0.282839714 |
| Q9Y3D3 | MRPS16  | 2   | 137.5 | 132.4 | 139.8 | 62.5  | 67.6  | 60.2  | 2.20 | 1.96 | 2.32 | 2.16 | 1.90E-05 | 0.285528458 |
| Q6P1N0 | CC2D1A  | 7   | 133.8 | 134.6 | 140.7 | 66.2  | 65.4  | 59.3  | 2.02 | 2.06 | 2.37 | 2.15 | 1.91E-05 | 0.285608145 |
| Q13409 | DYNC1I2 | 19  | 132.2 | 130.1 | 136.8 | 67.8  | 69.9  | 63.2  | 1.95 | 1.86 | 2.16 | 1.99 | 1.91E-05 | 0.285608145 |
| Q709C8 | VPS13C  | 26  | 48.7  | 50.1  | 57.9  | 151.3 | 149.9 | 142.1 | 0.32 | 0.33 | 0.41 | 0.35 | 1.91E-05 | 0.285608145 |
| Q9BW30 | TPPP3   | 4   | 12.6  | 28.7  | 16.5  | 187.4 | 171.3 | 183.5 | 0.07 | 0.17 | 0.09 | 0.11 | 1.93E-05 | 0.287682528 |
| P62081 | RPS7    | 18  | 121.7 | 117.6 | 120.1 | 78.3  | 82.4  | 79.9  | 1.55 | 1.43 | 1.50 | 1.49 | 1.95E-05 | 0.28952221  |
| P24928 | POLR2A  | 28  | 148.4 | 141.5 | 151   | 51.6  | 58.5  | 49    | 2.88 | 2.42 | 3.08 | 2.79 | 1.97E-05 | 0.28952221  |
| Q6UB35 | MTHFD1L | 10  | 155.4 | 145.6 | 154.5 | 44.6  | 54.4  | 45.5  | 3.48 | 2.68 | 3.40 | 3.19 | 1.96E-05 | 0.28952221  |
| Q96AY3 | FKBP10  | 10  | 146.8 | 147.2 | 139   | 53.2  | 52.8  | 61    | 2.76 | 2.79 | 2.28 | 2.61 | 1.95E-05 | 0.28952221  |
| Q9BZE9 | ASPSCR1 | 7   | 128.9 | 124   | 124.5 | 71.1  | 76    | 75.5  | 1.81 | 1.63 | 1.65 | 1.70 | 1.96E-05 | 0.28952221  |
| Q96JH7 | VCPIP1  | 28  | 164.9 | 176   | 179.7 | 35.1  | 24    | 20.3  | 4.70 | 7.33 | 8.85 | 6.96 | 1.98E-05 | 0.290752067 |
| Q7Z2Z2 | EFL1    | 10  | 74.2  | 68.5  | 72.7  | 125.8 | 131.5 | 127.3 | 0.59 | 0.52 | 0.57 | 0.56 | 1.98E-05 | 0.290752067 |
| Q5XKP0 | MIC13   | 2   | 121.6 | 122.4 | 126.2 | 78.4  | 77.6  | 73.8  | 1.55 | 1.58 | 1.71 | 1.61 | 2.00E-05 | 0.292815564 |
| O75822 | EIF3J   | 12  | 154.9 | 145.7 | 146.3 | 45.1  | 54.3  | 53.7  | 3.43 | 2.68 | 2.72 | 2.95 | 2.01E-05 | 0.293066963 |

|         |          |     |       |       |       |       |       |       |       |      |       |       |          |             |
|---------|----------|-----|-------|-------|-------|-------|-------|-------|-------|------|-------|-------|----------|-------------|
| P08574  | CYC1     | 10  | 120.6 | 122.1 | 117.9 | 79.4  | 77.9  | 82.1  | 1.52  | 1.57 | 1.44  | 1.51  | 2.03E-05 | 0.294365237 |
| Q9Y6C9  | MTCH2    | 10  | 92.8  | 92.8  | 91.4  | 107.2 | 107.2 | 108.6 | 0.87  | 0.87 | 0.84  | 0.86  | 2.03E-05 | 0.294365237 |
| P14618  | PKM      | 48  | 77.1  | 72.1  | 76    | 122.9 | 127.9 | 124   | 0.63  | 0.56 | 0.61  | 0.60  | 2.03E-05 | 0.294365237 |
| P63172  | DYNLT1   | 4   | 151.1 | 141.5 | 148.6 | 48.9  | 58.5  | 51.4  | 3.09  | 2.42 | 2.89  | 2.80  | 2.06E-05 | 0.297921783 |
| Q13347  | EIF3I    | 20  | 130.4 | 129.3 | 135.6 | 69.6  | 70.7  | 64.4  | 1.87  | 1.83 | 2.11  | 1.94  | 2.07E-05 | 0.298483585 |
| P29144  | TPP2     | 43  | 140.9 | 133.2 | 136   | 59.1  | 66.8  | 64    | 2.38  | 1.99 | 2.13  | 2.17  | 2.09E-05 | 0.300759505 |
| Q04637  | EIF4G1   | 48  | 136.3 | 130.5 | 137.4 | 63.7  | 69.5  | 62.6  | 2.14  | 1.88 | 2.19  | 2.07  | 2.14E-05 | 0.305346661 |
| A6NHR9  | SMCHD1   | 35  | 179.2 | 173.5 | 190.5 | 20.8  | 26.5  | 9.5   | 8.62  | 6.55 | 20.05 | 11.74 | 2.14E-05 | 0.305346661 |
| Q14566  | MCM6     | 26  | 139.1 | 132.2 | 138.9 | 60.9  | 67.8  | 61.1  | 2.28  | 1.95 | 2.27  | 2.17  | 2.15E-05 | 0.305741112 |
| Q8WUI4  | HDAC7    | 9   | 183.5 | 176.3 | 194.3 | 16.5  | 23.7  | 5.7   | 11.12 | 7.44 | 34.09 | 17.55 | 2.15E-05 | 0.305741112 |
| Q9Y316  | MEMO1    | 17  | 80    | 80.8  | 76.6  | 120   | 119.2 | 123.4 | 0.67  | 0.68 | 0.62  | 0.66  | 2.15E-05 | 0.305741112 |
| Q16630  | CPSF6    | 10  | 148.2 | 139.2 | 141.9 | 51.8  | 60.8  | 58.1  | 2.86  | 2.29 | 2.44  | 2.53  | 2.17E-05 | 0.307197633 |
| P12270  | TPR      | 102 | 133   | 127   | 132.4 | 67    | 73    | 67.6  | 1.99  | 1.74 | 1.96  | 1.89  | 2.18E-05 | 0.307984354 |
| Q8IWIJ2 | GCC2     | 21  | 126.1 | 121.3 | 125.5 | 73.9  | 78.7  | 74.5  | 1.71  | 1.54 | 1.68  | 1.64  | 2.21E-05 | 0.311097094 |
| Q9NZN4  | EHD2     | 14  | 67.1  | 63.5  | 70.6  | 132.9 | 136.5 | 129.4 | 0.50  | 0.47 | 0.55  | 0.51  | 2.22E-05 | 0.312305166 |
| O94874  | UFL1     | 6   | 141.6 | 142.9 | 150.6 | 58.4  | 57.1  | 49.4  | 2.42  | 2.50 | 3.05  | 2.66  | 2.24E-05 | 0.314127365 |
| Q8TEQ6  | GEMIN5   | 15  | 139.8 | 132   | 136.2 | 60.2  | 68    | 63.8  | 2.32  | 1.94 | 2.13  | 2.13  | 2.27E-05 | 0.318252192 |
| O75874  | IDH1     | 27  | 27.7  | 32.6  | 41.8  | 172.3 | 167.4 | 158.2 | 0.16  | 0.19 | 0.26  | 0.21  | 2.28E-05 | 0.31838116  |
| Q16881  | TXNRD1   | 28  | 50.5  | 38.4  | 44.4  | 149.5 | 161.6 | 155.6 | 0.34  | 0.24 | 0.29  | 0.29  | 2.31E-05 | 0.32187443  |
| P55786  | NPEPPS   | 33  | 144.5 | 136.9 | 145.2 | 55.5  | 63.1  | 54.8  | 2.60  | 2.17 | 2.65  | 2.47  | 2.33E-05 | 0.323493559 |
| Q9UII2  | ATPIF1   | 1   | 138.1 | 132.6 | 140.5 | 61.9  | 67.4  | 59.5  | 2.23  | 1.97 | 2.36  | 2.19  | 2.34E-05 | 0.324842951 |
| P16949  | STMN1    | 10  | 165.9 | 161   | 175.5 | 34.1  | 39    | 24.5  | 4.87  | 4.13 | 7.16  | 5.39  | 2.35E-05 | 0.324842951 |
| Q01780  | EXOSC10  | 9   | 161.3 | 149.6 | 153.1 | 38.7  | 50.4  | 46.9  | 4.17  | 2.97 | 3.26  | 3.47  | 2.39E-05 | 0.327024266 |
| P26599  | PTBP1    | 24  | 138.9 | 144.6 | 148.5 | 61.1  | 55.4  | 51.5  | 2.27  | 2.61 | 2.88  | 2.59  | 2.38E-05 | 0.327024266 |
| P49757  | NUMB     | 4   | 151.6 | 142   | 150.6 | 48.4  | 58    | 49.4  | 3.13  | 2.45 | 3.05  | 2.88  | 2.39E-05 | 0.327024266 |
| O95487  | SEC24B   | 8   | 141.4 | 151.6 | 146.4 | 58.6  | 48.4  | 53.6  | 2.41  | 3.13 | 2.73  | 2.76  | 2.39E-05 | 0.327024266 |
| P62314  | SNRPD1   | 5   | 140.4 | 136.1 | 145   | 59.6  | 63.9  | 55    | 2.36  | 2.13 | 2.64  | 2.37  | 2.40E-05 | 0.327024266 |
| Q15363  | TMED2    | 5   | 90.1  | 88    | 87.9  | 109.9 | 112   | 112.1 | 0.82  | 0.79 | 0.78  | 0.80  | 2.37E-05 | 0.327024266 |
| P52657  | GTF2A2   | 1   | 167.8 | 178.8 | 163.9 | 32.2  | 21.2  | 36.1  | 5.21  | 8.43 | 4.54  | 6.06  | 2.42E-05 | 0.328908354 |
| Q01433  | AMPD2    | 11  | 142.2 | 134   | 136.8 | 57.8  | 66    | 63.2  | 2.46  | 2.03 | 2.16  | 2.22  | 2.47E-05 | 0.334065278 |
| P53396  | ACLY     | 50  | 67.8  | 64.5  | 71.6  | 132.2 | 135.5 | 128.4 | 0.51  | 0.48 | 0.56  | 0.52  | 2.49E-05 | 0.334065278 |
| Q9NYF8  | BCLAF1   | 13  | 157.5 | 149.6 | 146.5 | 42.5  | 50.4  | 53.5  | 3.71  | 2.97 | 2.74  | 3.14  | 2.48E-05 | 0.334065278 |
| Q99459  | CDC5L    | 7   | 171   | 156.8 | 164.2 | 29    | 43.2  | 35.8  | 5.90  | 3.63 | 4.59  | 4.70  | 2.49E-05 | 0.334065278 |
| Q00839  | HNRNPU   | 47  | 139.8 | 135.3 | 144.1 | 60.2  | 64.7  | 55.9  | 2.32  | 2.09 | 2.58  | 2.33  | 2.47E-05 | 0.334065278 |
| Q8N1G4  | LRRC47   | 10  | 130.3 | 137.4 | 132.1 | 69.7  | 62.6  | 67.9  | 1.87  | 2.19 | 1.95  | 2.00  | 2.49E-05 | 0.334065278 |
| P40227  | CCT6A    | 25  | 147.2 | 138   | 145.1 | 52.8  | 62    | 54.9  | 2.79  | 2.23 | 2.64  | 2.55  | 2.50E-05 | 0.334065278 |
| P11142  | HSPA8    | 34  | 130.4 | 124.4 | 128.7 | 69.6  | 75.6  | 71.3  | 1.87  | 1.65 | 1.81  | 1.77  | 2.51E-05 | 0.334568823 |
| P85037  | FOXK1    | 9   | 130.5 | 136.6 | 137.8 | 69.5  | 63.4  | 62.2  | 1.88  | 2.15 | 2.22  | 2.08  | 2.58E-05 | 0.34398649  |
| P08238  | HSP90AB1 | 41  | 143.1 | 135.8 | 144.3 | 56.9  | 64.2  | 55.7  | 2.51  | 2.12 | 2.59  | 2.41  | 2.59E-05 | 0.344088952 |
| P07602  | PSAP     | 13  | 73.5  | 66.9  | 70.9  | 126.5 | 133.1 | 129.1 | 0.58  | 0.50 | 0.55  | 0.54  | 2.63E-05 | 0.348506133 |
| P08621  | SNRNP70  | 15  | 139.1 | 132.2 | 139.7 | 60.9  | 67.8  | 60.3  | 2.28  | 1.95 | 2.32  | 2.18  | 2.65E-05 | 0.350127158 |



|        |          |     |       |       |       |       |       |       |       |      |      |      |          |             |
|--------|----------|-----|-------|-------|-------|-------|-------|-------|-------|------|------|------|----------|-------------|
| O60271 | SPAG9    | 50  | 135.3 | 129.5 | 136.7 | 64.7  | 70.5  | 63.3  | 2.09  | 1.84 | 2.16 | 2.03 | 2.66E-05 | 0.350912778 |
| Q96SB4 | SRPK1    | 5   | 184.7 | 167.5 | 176.9 | 15.3  | 32.5  | 23.1  | 12.07 | 5.15 | 7.66 | 8.29 | 2.66E-05 | 0.350912778 |
| Q9UBU6 | FAM8A1   | 1   | 135.2 | 128.3 | 130.4 | 64.8  | 71.7  | 69.6  | 2.09  | 1.79 | 1.87 | 1.92 | 2.68E-05 | 0.352214217 |
| P13807 | GYS1     | 5   | 83.2  | 80.6  | 78.9  | 116.8 | 119.4 | 121.1 | 0.71  | 0.68 | 0.65 | 0.68 | 2.72E-05 | 0.355885049 |
| Q6ZSR9 | FLJ45252 | 6   | 177.9 | 167.8 | 162.4 | 22.1  | 32.2  | 37.6  | 8.05  | 5.21 | 4.32 | 5.86 | 2.72E-05 | 0.355885049 |
| O00429 | DNM1L    | 22  | 157.5 | 146.3 | 155.9 | 42.5  | 53.7  | 44.1  | 3.71  | 2.72 | 3.54 | 3.32 | 2.75E-05 | 0.359681878 |
| P54136 | RARS     | 36  | 135.6 | 129.3 | 136.3 | 64.4  | 70.7  | 63.7  | 2.11  | 1.83 | 2.14 | 2.02 | 2.80E-05 | 0.363525136 |
| P19784 | CSNK2A2  | 16  | 114   | 115.2 | 117.5 | 86    | 84.8  | 82.5  | 1.33  | 1.36 | 1.42 | 1.37 | 2.80E-05 | 0.363525136 |
| Q9P2J5 | LARS     | 51  | 149.7 | 139.6 | 146.6 | 50.3  | 60.4  | 53.4  | 2.98  | 2.31 | 2.75 | 2.68 | 2.80E-05 | 0.363525136 |
| Q10567 | AP1B1    | 13  | 140.3 | 138.5 | 147.6 | 59.7  | 61.5  | 52.4  | 2.35  | 2.25 | 2.82 | 2.47 | 2.81E-05 | 0.363845912 |
| Q9BWD1 | ACAT2    | 16  | 160.8 | 149.6 | 161.2 | 39.2  | 50.4  | 38.8  | 4.10  | 2.97 | 4.15 | 3.74 | 2.88E-05 | 0.372502297 |
| P49792 | RANBP2   | 41  | 125.1 | 127.1 | 131.4 | 74.9  | 72.9  | 68.6  | 1.67  | 1.74 | 1.92 | 1.78 | 2.92E-05 | 0.375227671 |
| Q14498 | RBM39    | 8   | 136.7 | 134.9 | 143.3 | 63.3  | 65.1  | 56.7  | 2.16  | 2.07 | 2.53 | 2.25 | 2.92E-05 | 0.375227671 |
| Q9NNW5 | WDR6     | 6   | 150.3 | 149.4 | 160.5 | 49.7  | 50.6  | 39.5  | 3.02  | 2.95 | 4.06 | 3.35 | 2.92E-05 | 0.375227671 |
| Q9H4A4 | RNPEP    | 23  | 57.2  | 49.1  | 58.8  | 142.8 | 150.9 | 141.2 | 0.40  | 0.33 | 0.42 | 0.38 | 2.94E-05 | 0.376038659 |
| Q13200 | PSMD2    | 34  | 144   | 137   | 146.5 | 56    | 63    | 53.5  | 2.57  | 2.17 | 2.74 | 2.49 | 2.96E-05 | 0.378070698 |
| P04818 | TYMS     | 10  | 159.3 | 146.9 | 154.1 | 40.7  | 53.1  | 45.9  | 3.91  | 2.77 | 3.36 | 3.35 | 3.03E-05 | 0.385927183 |
| O00410 | IPO5     | 38  | 137   | 129.8 | 136.5 | 63    | 70.2  | 63.5  | 2.17  | 1.85 | 2.15 | 2.06 | 3.05E-05 | 0.388032195 |
| P00167 | CYB5A    | 5   | 41.7  | 34.4  | 48.1  | 158.3 | 165.6 | 151.9 | 0.26  | 0.21 | 0.32 | 0.26 | 3.07E-05 | 0.388424829 |
| P78527 | PRKDC    | 167 | 134.8 | 131.3 | 139.5 | 65.2  | 68.7  | 60.5  | 2.07  | 1.91 | 2.31 | 2.09 | 3.06E-05 | 0.388424829 |
| P61619 | SEC61A1  | 5   | 141.4 | 139.8 | 149.3 | 58.6  | 60.2  | 50.7  | 2.41  | 2.32 | 2.94 | 2.56 | 3.07E-05 | 0.388424829 |
| Q6VMQ6 | ATF7IP   | 4   | 159.5 | 166.1 | 175.1 | 40.5  | 33.9  | 24.9  | 3.94  | 4.90 | 7.03 | 5.29 | 3.08E-05 | 0.388548535 |
| Q9NRG0 | CHRAC1   | 2   | 139.5 | 149.9 | 146.6 | 60.5  | 50.1  | 53.4  | 2.31  | 2.99 | 2.75 | 2.68 | 3.10E-05 | 0.389877022 |
| Q9UM54 | MYO6     | 27  | 159.2 | 174.7 | 165.5 | 40.8  | 25.3  | 34.5  | 3.90  | 6.91 | 4.80 | 5.20 | 3.11E-05 | 0.389877022 |
| Q7LBC6 | KDM3B    | 25  | 122.7 | 118.4 | 118.9 | 77.3  | 81.6  | 81.1  | 1.59  | 1.45 | 1.47 | 1.50 | 3.14E-05 | 0.392404218 |
| Q9Y6A5 | TACC3    | 16  | 182.2 | 165.3 | 171.2 | 17.8  | 34.7  | 28.8  | 10.24 | 4.76 | 5.94 | 6.98 | 3.15E-05 | 0.392404218 |
| O14787 | TNPO2    | 11  | 172.2 | 157   | 164.6 | 27.8  | 43    | 35.4  | 6.19  | 3.65 | 4.65 | 4.83 | 3.14E-05 | 0.392404218 |
| Q6PIU2 | NCEH1    | 13  | 147.5 | 138.2 | 146.9 | 52.5  | 61.8  | 53.1  | 2.81  | 2.24 | 2.77 | 2.60 | 3.16E-05 | 0.392861202 |
| Q92538 | GBF1     | 15  | 128.4 | 122.4 | 125.6 | 71.6  | 77.6  | 74.4  | 1.79  | 1.58 | 1.69 | 1.69 | 3.17E-05 | 0.393784468 |
| Q9UMX0 | UBQLN1   | 7   | 136.7 | 130.8 | 138.9 | 63.3  | 69.2  | 61.1  | 2.16  | 1.89 | 2.27 | 2.11 | 3.19E-05 | 0.395711078 |
| P45974 | USP5     | 31  | 134.2 | 128.1 | 135.2 | 65.8  | 71.9  | 64.8  | 2.04  | 1.78 | 2.09 | 1.97 | 3.21E-05 | 0.396944857 |
| Q9UKG1 | APPL1    | 8   | 146.7 | 139.7 | 137.3 | 53.3  | 60.3  | 62.7  | 2.75  | 2.32 | 2.19 | 2.42 | 3.23E-05 | 0.397887276 |
| Q96RE7 | NACC1    | 2   | 151.3 | 147.8 | 140.5 | 48.7  | 52.2  | 59.5  | 3.11  | 2.83 | 2.36 | 2.77 | 3.23E-05 | 0.397887276 |
| Q16706 | MAN2A1   | 10  | 116   | 120.2 | 119.2 | 84    | 79.8  | 80.8  | 1.38  | 1.51 | 1.48 | 1.45 | 3.27E-05 | 0.400992111 |
| P20962 | PTMS     | 4   | 132.2 | 138.1 | 140.8 | 67.8  | 61.9  | 59.2  | 1.95  | 2.23 | 2.38 | 2.19 | 3.26E-05 | 0.400992111 |
| Q92733 | PRCC     | 5   | 137.4 | 131.4 | 130   | 62.6  | 68.6  | 70    | 2.19  | 1.92 | 1.86 | 1.99 | 3.33E-05 | 0.407690051 |
| Q00325 | SLC25A3  | 15  | 120.1 | 116   | 119.5 | 79.9  | 84    | 80.5  | 1.50  | 1.38 | 1.48 | 1.46 | 3.34E-05 | 0.408394879 |
| Q96HQ2 | CDKN2AI  | 1   | 73.5  | 66.7  | 67.5  | 126.5 | 133.3 | 132.5 | 0.58  | 0.50 | 0.51 | 0.53 | 3.49E-05 | 0.425728798 |
| Q9UPN3 | MACF1    | 71  | 166.2 | 151.9 | 159.4 | 33.8  | 48.1  | 40.6  | 4.92  | 3.16 | 3.93 | 4.00 | 3.50E-05 | 0.42614389  |
| P07910 | HNRNPC   | 16  | 162   | 148.5 | 155.8 | 38    | 51.5  | 44.2  | 4.26  | 2.88 | 3.52 | 3.56 | 3.62E-05 | 0.439524296 |
| O75083 | WDR1     | 24  | 130.2 | 123.7 | 128.3 | 69.8  | 76.3  | 71.7  | 1.87  | 1.62 | 1.79 | 1.76 | 3.63E-05 | 0.439673961 |

|        |         |    |       |       |       |       |       |       |       |       |      |       |          |             |
|--------|---------|----|-------|-------|-------|-------|-------|-------|-------|-------|------|-------|----------|-------------|
| O95757 | HSPA4L  | 19 | 147.7 | 137.5 | 141.1 | 52.3  | 62.5  | 58.9  | 2.82  | 2.20  | 2.40 | 2.47  | 3.74E-05 | 0.44687208  |
| Q9NQT8 | KIF13B  | 18 | 61.9  | 54.3  | 63.5  | 138.1 | 145.7 | 136.5 | 0.45  | 0.37  | 0.47 | 0.43  | 3.70E-05 | 0.44687208  |
| Q8NC51 | SERBP1  | 13 | 147.7 | 137.4 | 144.9 | 52.3  | 62.6  | 55.1  | 2.82  | 2.19  | 2.63 | 2.55  | 3.74E-05 | 0.44687208  |
| P51149 | RAB7A   | 23 | 136.2 | 128.3 | 133.5 | 63.8  | 71.7  | 66.5  | 2.13  | 1.79  | 2.01 | 1.98  | 3.74E-05 | 0.44687208  |
| P10599 | TXN     | 7  | 59.7  | 51.8  | 61.6  | 140.3 | 148.2 | 138.4 | 0.43  | 0.35  | 0.45 | 0.41  | 3.73E-05 | 0.44687208  |
| Q9BQ70 | TCF25   | 2  | 147.9 | 153.3 | 161.1 | 52.1  | 46.7  | 38.9  | 2.84  | 3.28  | 4.14 | 3.42  | 3.71E-05 | 0.44687208  |
| P22102 | GART    | 41 | 143.8 | 136.6 | 146.7 | 56.2  | 63.4  | 53.3  | 2.56  | 2.15  | 2.75 | 2.49  | 3.72E-05 | 0.44687208  |
| P30876 | POLR2B  | 32 | 131.6 | 136.8 | 140.5 | 68.4  | 63.2  | 59.5  | 1.92  | 2.16  | 2.36 | 2.15  | 3.77E-05 | 0.449552982 |
| Q68CP9 | ARID2   | 6  | 184.5 | 194.7 | 173.9 | 15.5  | 5.3   | 26.1  | 11.90 | 36.74 | 6.66 | 18.43 | 3.79E-05 | 0.450241594 |
| O60218 | AKR1B10 | 22 | 22.4  | 35.4  | 17.5  | 177.6 | 164.6 | 182.5 | 0.13  | 0.22  | 0.10 | 0.15  | 3.81E-05 | 0.45118544  |
| P04632 | CAPNS1  | 13 | 88.1  | 87.4  | 85    | 111.9 | 112.6 | 115   | 0.79  | 0.78  | 0.74 | 0.77  | 3.81E-05 | 0.45118544  |
| Q9Y639 | NPTN    | 6  | 58.4  | 50.8  | 61.1  | 141.6 | 149.2 | 138.9 | 0.41  | 0.34  | 0.44 | 0.40  | 3.82E-05 | 0.45118544  |
| P12814 | ACTN1   | 42 | 143   | 133.9 | 141.5 | 57    | 66.1  | 58.5  | 2.51  | 2.03  | 2.42 | 2.32  | 3.83E-05 | 0.451543818 |
| Q9UHD9 | UBQLN2  | 6  | 147.6 | 145.2 | 156.9 | 52.4  | 54.8  | 43.1  | 2.82  | 2.65  | 3.64 | 3.04  | 3.85E-05 | 0.453884748 |
| Q08380 | LGALS3B | 6  | 27.8  | 7.2   | 15.8  | 172.2 | 192.8 | 184.2 | 0.16  | 0.04  | 0.09 | 0.09  | 3.94E-05 | 0.460669481 |
| Q5JRA6 | MIA3    | 20 | 173.5 | 157.3 | 164.7 | 26.5  | 42.7  | 35.3  | 6.55  | 3.68  | 4.67 | 4.97  | 3.93E-05 | 0.460669481 |
| O60664 | PLIN3   | 26 | 173.1 | 156.9 | 165.4 | 26.9  | 43.1  | 34.6  | 6.43  | 3.64  | 4.78 | 4.95  | 3.93E-05 | 0.460669481 |
| Q16513 | PKN2    | 17 | 148.8 | 138.9 | 148.6 | 51.2  | 61.1  | 51.4  | 2.91  | 2.27  | 2.89 | 2.69  | 3.94E-05 | 0.460669481 |
| P61964 | WDR5    | 10 | 114.7 | 118.6 | 115.6 | 85.3  | 81.4  | 84.4  | 1.34  | 1.46  | 1.37 | 1.39  | 4.03E-05 | 0.470402093 |
| P33176 | KIF5B   | 49 | 124.2 | 118.8 | 122.3 | 75.8  | 81.2  | 77.7  | 1.64  | 1.46  | 1.57 | 1.56  | 4.11E-05 | 0.477924927 |
| Q07812 | BAX     | 9  | 58.6  | 48.8  | 58.5  | 141.4 | 151.2 | 141.5 | 0.41  | 0.32  | 0.41 | 0.38  | 4.12E-05 | 0.478369029 |
| Q08379 | GOLGA2  | 17 | 143.6 | 140.6 | 133.9 | 56.4  | 59.4  | 66.1  | 2.55  | 2.37  | 2.03 | 2.31  | 4.15E-05 | 0.480677959 |
| Q86VP6 | CAND1   | 36 | 125.8 | 120.2 | 124.8 | 74.2  | 79.8  | 75.2  | 1.70  | 1.51  | 1.66 | 1.62  | 4.20E-05 | 0.485783716 |
| Q9BPX5 | ARPC5L  | 5  | 162.4 | 170.6 | 154.7 | 37.6  | 29.4  | 45.3  | 4.32  | 5.80  | 3.42 | 4.51  | 4.27E-05 | 0.489803717 |
| Q13011 | ECH1    | 19 | 76.9  | 77.7  | 81.9  | 123.1 | 122.3 | 118.1 | 0.62  | 0.64  | 0.69 | 0.65  | 4.24E-05 | 0.489803717 |
| Q05397 | PTK2    | 4  | 155.5 | 157.9 | 170   | 44.5  | 42.1  | 30    | 3.49  | 3.75  | 5.67 | 4.30  | 4.28E-05 | 0.489803717 |
| P22307 | SCP2    | 14 | 67.6  | 74.4  | 68    | 132.4 | 125.6 | 132   | 0.51  | 0.59  | 0.52 | 0.54  | 4.28E-05 | 0.489803717 |
| Q9Y3P9 | RABGAP1 | 12 | 156.9 | 145.4 | 157.3 | 43.1  | 54.6  | 42.7  | 3.64  | 2.66  | 3.68 | 3.33  | 4.26E-05 | 0.489803717 |
| Q9Y4E8 | USP15   | 12 | 129.8 | 123.2 | 125.7 | 70.2  | 76.8  | 74.3  | 1.85  | 1.60  | 1.69 | 1.71  | 4.26E-05 | 0.489803717 |
| Q15102 | PAFAH1B | 12 | 126.4 | 121.6 | 127.7 | 73.6  | 78.4  | 72.3  | 1.72  | 1.55  | 1.77 | 1.68  | 4.30E-05 | 0.490980998 |
| Q8NE71 | ABCF1   | 20 | 169.7 | 154.5 | 167.1 | 30.3  | 45.5  | 32.9  | 5.60  | 3.40  | 5.08 | 4.69  | 4.32E-05 | 0.492494779 |
| O75947 | ATP5H   | 10 | 118.4 | 115.1 | 119.4 | 81.6  | 84.9  | 80.6  | 1.45  | 1.36  | 1.48 | 1.43  | 4.34E-05 | 0.493334447 |
| O15056 | SYNJ2   | 13 | 142.1 | 147.7 | 154.4 | 57.9  | 52.3  | 45.6  | 2.45  | 2.82  | 3.39 | 2.89  | 4.41E-05 | 0.500197827 |
| P18077 | RPL35A  | 8  | 132.6 | 127.5 | 135.6 | 67.4  | 72.5  | 64.4  | 1.97  | 1.76  | 2.11 | 1.94  | 4.44E-05 | 0.503198419 |
| Q8IZL8 | PELP1   | 10 | 149.6 | 139.4 | 149.8 | 50.4  | 60.6  | 50.2  | 2.97  | 2.30  | 2.98 | 2.75  | 4.47E-05 | 0.503572847 |
| P62306 | SNRPF   | 1  | 135.7 | 127.7 | 133.7 | 64.3  | 72.3  | 66.3  | 2.11  | 1.77  | 2.02 | 1.96  | 4.48E-05 | 0.503572847 |
| Q5BJF2 | TMEM97  | 3  | 32.7  | 12.8  | 20.5  | 167.3 | 187.2 | 179.5 | 0.20  | 0.07  | 0.11 | 0.13  | 4.48E-05 | 0.503572847 |
| Q92890 | UFD1L   | 8  | 124   | 120.8 | 118.6 | 76    | 79.2  | 81.4  | 1.63  | 1.53  | 1.46 | 1.54  | 4.46E-05 | 0.503572847 |
| P53801 | PTTG1IP | 2  | 131.6 | 140.9 | 137.8 | 68.4  | 59.1  | 62.2  | 1.92  | 2.38  | 2.22 | 2.17  | 4.50E-05 | 0.50489798  |
| Q9NZI8 | IGF2BP1 | 22 | 138.7 | 130.7 | 138.8 | 61.3  | 69.3  | 61.2  | 2.26  | 1.89  | 2.27 | 2.14  | 4.51E-05 | 0.505126758 |
| O15397 | IPO8    | 4  | 166.8 | 169.4 | 154.1 | 33.2  | 30.6  | 45.9  | 5.02  | 5.54  | 3.36 | 4.64  | 4.54E-05 | 0.507081558 |

|        |         |    |       |       |       |       |       |       |      |      |      |      |          |             |
|--------|---------|----|-------|-------|-------|-------|-------|-------|------|------|------|------|----------|-------------|
| P23381 | WARS    | 25 | 148.1 | 137.4 | 141   | 51.9  | 62.6  | 59    | 2.85 | 2.19 | 2.39 | 2.48 | 4.55E-05 | 0.507081558 |
| P68036 | UBE2L3  | 9  | 140.9 | 132.3 | 140.7 | 59.1  | 67.7  | 59.3  | 2.38 | 1.95 | 2.37 | 2.24 | 4.57E-05 | 0.508675905 |
| Q16181 | 7-Sep   | 17 | 127.7 | 124.3 | 131.5 | 72.3  | 75.7  | 68.5  | 1.77 | 1.64 | 1.92 | 1.78 | 4.59E-05 | 0.50963886  |
| P52294 | KPNA1   | 5  | 139.1 | 146.9 | 150.7 | 60.9  | 53.1  | 49.3  | 2.28 | 2.77 | 3.06 | 2.70 | 4.64E-05 | 0.511479469 |
| P29966 | MARCKS  | 9  | 129.9 | 125.4 | 133   | 70.1  | 74.6  | 67    | 1.85 | 1.68 | 1.99 | 1.84 | 4.65E-05 | 0.511479469 |
| Q16186 | ADRM1   | 4  | 132.7 | 131.6 | 139.9 | 67.3  | 68.4  | 60.1  | 1.97 | 1.92 | 2.33 | 2.07 | 4.64E-05 | 0.511479469 |
| Q9H6T3 | RPAP3   | 13 | 146.1 | 144.5 | 156.2 | 53.9  | 55.5  | 43.8  | 2.71 | 2.60 | 3.57 | 2.96 | 4.62E-05 | 0.511479469 |
| Q9BQ52 | ELAC2   | 22 | 117   | 114.4 | 118.7 | 83    | 85.6  | 81.3  | 1.41 | 1.34 | 1.46 | 1.40 | 4.63E-05 | 0.511479469 |
| Q9NZ08 | ERAP1   | 10 | 141.5 | 153   | 151.9 | 58.5  | 47    | 48.1  | 2.42 | 3.26 | 3.16 | 2.94 | 4.68E-05 | 0.513721859 |
| Q14008 | CKAP5   | 47 | 143.8 | 134.8 | 144.3 | 56.2  | 65.2  | 55.7  | 2.56 | 2.07 | 2.59 | 2.41 | 4.74E-05 | 0.51912124  |
| Q04206 | RELA    | 7  | 130.5 | 124.3 | 131   | 69.5  | 75.7  | 69    | 1.88 | 1.64 | 1.90 | 1.81 | 4.74E-05 | 0.51912124  |
| A0AVT1 | UBA6    | 23 | 140.6 | 133   | 142.6 | 59.4  | 67    | 57.4  | 2.37 | 1.99 | 2.48 | 2.28 | 4.78E-05 | 0.522243906 |
| Q01201 | RELB    | 4  | 159.1 | 149.7 | 146   | 40.9  | 50.3  | 54    | 3.89 | 2.98 | 2.70 | 3.19 | 4.80E-05 | 0.523148901 |
| Q9UI26 | IPO11   | 5  | 154.8 | 148.8 | 163.3 | 45.2  | 51.2  | 36.7  | 3.42 | 2.91 | 4.45 | 3.59 | 4.81E-05 | 0.523437815 |
| P22314 | UBA1    | 51 | 126.3 | 127.9 | 133.6 | 73.7  | 72.1  | 66.4  | 1.71 | 1.77 | 2.01 | 1.83 | 4.83E-05 | 0.524791091 |
| Q5JPE7 | NOMO2   | 2  | 120.5 | 117   | 122.1 | 79.5  | 83    | 77.9  | 1.52 | 1.41 | 1.57 | 1.50 | 4.86E-05 | 0.525757158 |
| Q8TDY2 | RB1CC1  | 11 | 155.8 | 172.6 | 166.9 | 44.2  | 27.4  | 33.1  | 3.52 | 6.30 | 5.04 | 4.96 | 4.85E-05 | 0.525757158 |
| Q86Y56 | DNAAF5  | 14 | 159   | 145.3 | 151.8 | 41    | 54.7  | 48.2  | 3.88 | 2.66 | 3.15 | 3.23 | 4.92E-05 | 0.527223557 |
| P16144 | ITGB4   | 22 | 48.5  | 51    | 60.2  | 151.5 | 149   | 139.8 | 0.32 | 0.34 | 0.43 | 0.36 | 4.93E-05 | 0.527223557 |
| O60610 | DIAPH1  | 18 | 144.7 | 139.5 | 134.3 | 55.3  | 60.5  | 65.7  | 2.62 | 2.31 | 2.04 | 2.32 | 4.91E-05 | 0.527223557 |
| O75116 | ROCK2   | 29 | 82.2  | 76.8  | 79.4  | 117.8 | 123.2 | 120.6 | 0.70 | 0.62 | 0.66 | 0.66 | 4.89E-05 | 0.527223557 |
| Q9H2G2 | SLK     | 31 | 131.6 | 125.3 | 132.5 | 68.4  | 74.7  | 67.5  | 1.92 | 1.68 | 1.96 | 1.85 | 4.91E-05 | 0.527223557 |
| Q9Y6W5 | WASF2   | 7  | 127.4 | 135.7 | 132.6 | 72.6  | 64.3  | 67.4  | 1.75 | 2.11 | 1.97 | 1.94 | 4.89E-05 | 0.527223557 |
| P26639 | TARS    | 39 | 129.5 | 122.8 | 128.1 | 70.5  | 77.2  | 71.9  | 1.84 | 1.59 | 1.78 | 1.74 | 4.94E-05 | 0.528192039 |
| P46779 | RPL28   | 11 | 129.4 | 123   | 129   | 70.6  | 77    | 71    | 1.83 | 1.60 | 1.82 | 1.75 | 4.98E-05 | 0.529240595 |
| P06733 | ENO1    | 41 | 118.8 | 123.3 | 124.3 | 81.2  | 76.7  | 75.7  | 1.46 | 1.61 | 1.64 | 1.57 | 5.02E-05 | 0.529240595 |
| P33991 | MCM4    | 36 | 136.8 | 135.3 | 144.9 | 63.2  | 64.7  | 55.1  | 2.16 | 2.09 | 2.63 | 2.30 | 5.03E-05 | 0.529240595 |
| Q9BXW9 | FANCD2  | 2  | 148.2 | 160.6 | 161.8 | 51.8  | 39.4  | 38.2  | 2.86 | 4.08 | 4.24 | 3.72 | 5.02E-05 | 0.529240595 |
| P11940 | PABPC1  | 12 | 137.4 | 130.3 | 139.2 | 62.6  | 69.7  | 60.8  | 2.19 | 1.87 | 2.29 | 2.12 | 4.97E-05 | 0.529240595 |
| Q9P258 | RCC2    | 22 | 143.9 | 134   | 142.2 | 56.1  | 66    | 57.8  | 2.57 | 2.03 | 2.46 | 2.35 | 5.00E-05 | 0.529240595 |
| Q8IWW6 | ARHGAP1 | 4  | 56.7  | 45.2  | 44.8  | 143.3 | 154.8 | 155.2 | 0.40 | 0.29 | 0.29 | 0.33 | 5.00E-05 | 0.529240595 |
| O15294 | OGT     | 17 | 144.9 | 135.6 | 145.5 | 55.1  | 64.4  | 54.5  | 2.63 | 2.11 | 2.67 | 2.47 | 4.99E-05 | 0.529240595 |
| P18621 | RPL17   | 13 | 132.8 | 125.1 | 129.5 | 67.2  | 74.9  | 70.5  | 1.98 | 1.67 | 1.84 | 1.83 | 5.05E-05 | 0.531172904 |
| P40937 | RFC5    | 15 | 133.7 | 131.3 | 140.3 | 66.3  | 68.7  | 59.7  | 2.02 | 1.91 | 2.35 | 2.09 | 5.08E-05 | 0.533037128 |
| P62263 | RPS14   | 11 | 128.5 | 123.3 | 122.4 | 71.5  | 76.7  | 77.6  | 1.80 | 1.61 | 1.58 | 1.66 | 5.13E-05 | 0.537824751 |
| P53621 | COPA    | 46 | 121.5 | 117.7 | 123.1 | 78.5  | 82.3  | 76.9  | 1.55 | 1.43 | 1.60 | 1.53 | 5.20E-05 | 0.542759945 |
| Q9NQW7 | XPNPEP1 | 23 | 139.8 | 130.4 | 135.8 | 60.2  | 69.6  | 64.2  | 2.32 | 1.87 | 2.12 | 2.10 | 5.19E-05 | 0.542759945 |
| Q9UKF6 | CPSF3   | 9  | 143.2 | 145.5 | 155.3 | 56.8  | 54.5  | 44.7  | 2.52 | 2.67 | 3.47 | 2.89 | 5.25E-05 | 0.546715069 |
| Q09161 | NCBP1   | 18 | 152.1 | 140.1 | 144.2 | 47.9  | 59.9  | 55.8  | 3.18 | 2.34 | 2.58 | 2.70 | 5.29E-05 | 0.550215411 |
| Q641Q2 | WASHC2A | 12 | 132.4 | 129   | 137.8 | 67.6  | 71    | 62.2  | 1.96 | 1.82 | 2.22 | 2.00 | 5.30E-05 | 0.550215411 |
| O43395 | PRPF3   | 14 | 140.7 | 152.8 | 144.5 | 59.3  | 47.2  | 55.5  | 2.37 | 3.24 | 2.60 | 2.74 | 5.35E-05 | 0.554355617 |

|        |         |     |       |       |       |       |       |       |       |      |       |      |          |             |
|--------|---------|-----|-------|-------|-------|-------|-------|-------|-------|------|-------|------|----------|-------------|
| P41250 | GARS    | 35  | 142.9 | 134.3 | 144.5 | 57.1  | 65.7  | 55.5  | 2.50  | 2.04 | 2.60  | 2.38 | 5.46E-05 | 0.565009721 |
| P10619 | CTSA    | 7   | 136.4 | 143.9 | 134   | 63.6  | 56.1  | 66    | 2.14  | 2.57 | 2.03  | 2.25 | 5.51E-05 | 0.568291469 |
| Q09666 | AHNAK   | 325 | 134.1 | 126.6 | 133.9 | 65.9  | 73.4  | 66.1  | 2.03  | 1.72 | 2.03  | 1.93 | 5.51E-05 | 0.568291469 |
| Q9GZP9 | DERL2   | 1   | 59.2  | 64.5  | 68.9  | 140.8 | 135.5 | 131.1 | 0.42  | 0.48 | 0.53  | 0.47 | 5.53E-05 | 0.569339873 |
| P30050 | RPL12   | 6   | 127.5 | 130.8 | 123.4 | 72.5  | 69.2  | 76.6  | 1.76  | 1.89 | 1.61  | 1.75 | 5.61E-05 | 0.57598273  |
| Q86UU0 | BCL9L   | 5   | 126.3 | 120.1 | 124.8 | 73.7  | 79.9  | 75.2  | 1.71  | 1.50 | 1.66  | 1.63 | 5.63E-05 | 0.576761381 |
| P41252 | IARS    | 52  | 121.3 | 118   | 123.7 | 78.7  | 82    | 76.3  | 1.54  | 1.44 | 1.62  | 1.53 | 5.63E-05 | 0.576761381 |
| Q5SW79 | CEP170  | 9   | 158.1 | 154.4 | 170.3 | 41.9  | 45.6  | 29.7  | 3.77  | 3.39 | 5.73  | 4.30 | 5.68E-05 | 0.578939515 |
| Q3ZCQ8 | TIMM50  | 10  | 136.6 | 134.7 | 128   | 63.4  | 65.3  | 72    | 2.15  | 2.06 | 1.78  | 2.00 | 5.67E-05 | 0.578939515 |
| Q9Y263 | PLAA    | 13  | 138.3 | 132.4 | 129.3 | 61.7  | 67.6  | 70.7  | 2.24  | 1.96 | 1.83  | 2.01 | 5.78E-05 | 0.588342457 |
| O43447 | PPIH    | 6   | 147.2 | 157.5 | 162.1 | 52.8  | 42.5  | 37.9  | 2.79  | 3.71 | 4.28  | 3.59 | 5.79E-05 | 0.588369332 |
| P50570 | DNM2    | 6   | 120.6 | 124.4 | 127.2 | 79.4  | 75.6  | 72.8  | 1.52  | 1.65 | 1.75  | 1.64 | 5.86E-05 | 0.594513214 |
| Q12905 | ILF2    | 17  | 135.5 | 146.9 | 142.5 | 64.5  | 53.1  | 57.5  | 2.10  | 2.77 | 2.48  | 2.45 | 5.93E-05 | 0.600523498 |
| Q9NRY5 | FAM114A | 5   | 139.4 | 138.3 | 148.9 | 60.6  | 61.7  | 51.1  | 2.30  | 2.24 | 2.91  | 2.49 | 5.94E-05 | 0.600523498 |
| P04844 | RPN2    | 12  | 124.3 | 122.1 | 128.9 | 75.7  | 77.9  | 71.1  | 1.64  | 1.57 | 1.81  | 1.67 | 5.96E-05 | 0.601704152 |
| P43246 | MSH2    | 8   | 117.1 | 114   | 118.5 | 82.9  | 86    | 81.5  | 1.41  | 1.33 | 1.45  | 1.40 | 6.14E-05 | 0.617806972 |
| Q96KG9 | SCYL1   | 1   | 124.1 | 130.2 | 131.6 | 75.9  | 69.8  | 68.4  | 1.64  | 1.87 | 1.92  | 1.81 | 6.14E-05 | 0.617806972 |
| O96005 | CLPTM1  | 11  | 133.7 | 125.8 | 132.6 | 66.3  | 74.2  | 67.4  | 2.02  | 1.70 | 1.97  | 1.89 | 6.16E-05 | 0.618392733 |
| Q96PK6 | RBM14   | 7   | 159.3 | 156.6 | 173   | 40.7  | 43.4  | 27    | 3.91  | 3.61 | 6.41  | 4.64 | 6.20E-05 | 0.622073824 |
| P62851 | RPS25   | 10  | 116.2 | 118   | 121.3 | 83.8  | 82    | 78.7  | 1.39  | 1.44 | 1.54  | 1.46 | 6.23E-05 | 0.622770351 |
| Q8NFI5 | GPRC5A  | 5   | 25    | 21.7  | 40.3  | 175   | 178.3 | 159.7 | 0.14  | 0.12 | 0.25  | 0.17 | 6.23E-05 | 0.622770351 |
| P36915 | GNL1    | 12  | 182.1 | 163.7 | 182.3 | 17.9  | 36.3  | 17.7  | 10.17 | 4.51 | 10.30 | 8.33 | 6.35E-05 | 0.632137898 |
| Q9BUQ8 | DDX23   | 9   | 153.3 | 140.3 | 149.7 | 46.7  | 59.7  | 50.3  | 3.28  | 2.35 | 2.98  | 2.87 | 6.36E-05 | 0.632137898 |
| O14776 | TCERG1  | 28  | 133.2 | 128.4 | 137.7 | 66.8  | 71.6  | 62.3  | 1.99  | 1.79 | 2.21  | 2.00 | 6.36E-05 | 0.632137898 |
| O95202 | LETM1   | 24  | 141.2 | 132.7 | 143   | 58.8  | 67.3  | 57    | 2.40  | 1.97 | 2.51  | 2.29 | 6.48E-05 | 0.642556187 |
| Q8WXF1 | PSPC1   | 6   | 155.3 | 141.7 | 151.2 | 44.7  | 58.3  | 48.8  | 3.47  | 2.43 | 3.10  | 3.00 | 6.48E-05 | 0.642556187 |
| Q9HC38 | GLOD4   | 18  | 87.7  | 84.3  | 87.5  | 112.3 | 115.7 | 112.5 | 0.78  | 0.73 | 0.78  | 0.76 | 6.50E-05 | 0.64330724  |
| P31749 | AKT1    | 5   | 160.4 | 150.4 | 167.1 | 39.6  | 49.6  | 32.9  | 4.05  | 3.03 | 5.08  | 4.05 | 6.58E-05 | 0.649420686 |
| Q15029 | EFTUD2  | 37  | 140.5 | 130.5 | 137.6 | 59.5  | 69.5  | 62.4  | 2.36  | 1.88 | 2.21  | 2.15 | 6.65E-05 | 0.653433764 |
| P33992 | MCM5    | 16  | 140.8 | 134   | 145.3 | 59.2  | 66    | 54.7  | 2.38  | 2.03 | 2.66  | 2.35 | 6.65E-05 | 0.653433764 |
| Q6IN85 | PPP4R3A | 7   | 136.1 | 142.8 | 132.4 | 63.9  | 57.2  | 67.6  | 2.13  | 2.50 | 1.96  | 2.19 | 6.64E-05 | 0.653433764 |
| Q9H9A6 | LRRC40  | 3   | 165.2 | 150.2 | 164.8 | 34.8  | 49.8  | 35.2  | 4.75  | 3.02 | 4.68  | 4.15 | 6.68E-05 | 0.655428456 |
| Q9UKD2 | MRTO4   | 9   | 128.9 | 122.2 | 128.6 | 71.1  | 77.8  | 71.4  | 1.81  | 1.57 | 1.80  | 1.73 | 6.71E-05 | 0.657313695 |
| P49454 | CENPF   | 7   | 169.9 | 152.4 | 162.1 | 30.1  | 47.6  | 37.9  | 5.64  | 3.20 | 4.28  | 4.37 | 6.74E-05 | 0.659425084 |
| O00625 | PIR     | 11  | 69.5  | 74.9  | 66.5  | 130.5 | 125.1 | 133.5 | 0.53  | 0.60 | 0.50  | 0.54 | 6.88E-05 | 0.671057848 |
| P35270 | SPR     | 14  | 54.4  | 65.8  | 58    | 145.6 | 134.2 | 142   | 0.37  | 0.49 | 0.41  | 0.42 | 6.92E-05 | 0.673831203 |
| O15027 | SEC16A  | 14  | 149.2 | 142   | 156.1 | 50.8  | 58    | 43.9  | 2.94  | 2.45 | 3.56  | 2.98 | 6.93E-05 | 0.673835002 |
| Q96EP5 | DAZAP1  | 8   | 135.5 | 147.1 | 144.5 | 64.5  | 52.9  | 55.5  | 2.10  | 2.78 | 2.60  | 2.50 | 6.94E-05 | 0.674248037 |
| P39023 | RPL3    | 24  | 131.7 | 127.3 | 136.5 | 68.3  | 72.7  | 63.5  | 1.93  | 1.75 | 2.15  | 1.94 | 7.11E-05 | 0.689406828 |
| Q14978 | NOLC1   | 6   | 131.1 | 123.6 | 130.2 | 68.9  | 76.4  | 69.8  | 1.90  | 1.62 | 1.87  | 1.80 | 7.14E-05 | 0.691207508 |
| P62910 | RPL32   | 8   | 130.3 | 124.1 | 123.5 | 69.7  | 75.9  | 76.5  | 1.87  | 1.64 | 1.61  | 1.71 | 7.20E-05 | 0.695366453 |

|        |         |    |       |       |       |       |       |       |       |       |      |      |          |             |
|--------|---------|----|-------|-------|-------|-------|-------|-------|-------|-------|------|------|----------|-------------|
| P16435 | POR     | 26 | 84    | 80.1  | 84.7  | 116   | 119.9 | 115.3 | 0.72  | 0.67  | 0.73 | 0.71 | 7.24E-05 | 0.69773058  |
| Q5GLZ8 | HERC4   | 8  | 142.8 | 138   | 150.6 | 57.2  | 62    | 49.4  | 2.50  | 2.23  | 3.05 | 2.59 | 7.24E-05 | 0.69773058  |
| P51858 | HDGF    | 10 | 76    | 78.2  | 82.1  | 124   | 121.8 | 117.9 | 0.61  | 0.64  | 0.70 | 0.65 | 7.30E-05 | 0.700396943 |
| P67809 | YBX1    | 11 | 163.2 | 147.2 | 154.7 | 36.8  | 52.8  | 45.3  | 4.43  | 2.79  | 3.42 | 3.55 | 7.29E-05 | 0.700396943 |
| O96008 | TOMM40  | 9  | 136.2 | 133   | 127   | 63.8  | 67    | 73    | 2.13  | 1.99  | 1.74 | 1.95 | 7.33E-05 | 0.701997462 |
| O14936 | CASK    | 5  | 62.6  | 50.4  | 58.7  | 137.4 | 149.6 | 141.3 | 0.46  | 0.34  | 0.42 | 0.40 | 7.34E-05 | 0.701997462 |
| P62841 | RPS15   | 4  | 128.9 | 123.5 | 131.5 | 71.1  | 76.5  | 68.5  | 1.81  | 1.61  | 1.92 | 1.78 | 7.38E-05 | 0.705136363 |
| P09497 | CLTB    | 6  | 124.1 | 118.3 | 123.6 | 75.9  | 81.7  | 76.4  | 1.64  | 1.45  | 1.62 | 1.57 | 7.42E-05 | 0.707316385 |
| O43252 | PAPSS1  | 8  | 134.8 | 125.9 | 131.5 | 65.2  | 74.1  | 68.5  | 2.07  | 1.70  | 1.92 | 1.90 | 7.48E-05 | 0.710000397 |
| P08962 | CD63    | 4  | 79.7  | 84.2  | 84    | 120.3 | 115.8 | 116   | 0.66  | 0.73  | 0.72 | 0.70 | 7.48E-05 | 0.710000397 |
| Q9NS69 | TOMM22  | 5  | 145.1 | 136.6 | 149.1 | 54.9  | 63.4  | 50.9  | 2.64  | 2.15  | 2.93 | 2.58 | 7.48E-05 | 0.710000397 |
| O60762 | DPM1    | 6  | 130.6 | 123.6 | 131   | 69.4  | 76.4  | 69    | 1.88  | 1.62  | 1.90 | 1.80 | 7.51E-05 | 0.710154747 |
| P68371 | TUBB4B  | 1  | 128.1 | 120.9 | 124.8 | 71.9  | 79.1  | 75.2  | 1.78  | 1.53  | 1.66 | 1.66 | 7.50E-05 | 0.710154747 |
| Q03252 | LMNB2   | 22 | 153.8 | 140   | 148.3 | 46.2  | 60    | 51.7  | 3.33  | 2.33  | 2.87 | 2.84 | 7.53E-05 | 0.711471018 |
| P52630 | STAT2   | 4  | 126.3 | 121.8 | 119.8 | 73.7  | 78.2  | 80.2  | 1.71  | 1.56  | 1.49 | 1.59 | 7.62E-05 | 0.718461958 |
| O00151 | PDLIM1  | 18 | 38.4  | 23.3  | 41.3  | 161.6 | 176.7 | 158.7 | 0.24  | 0.13  | 0.26 | 0.21 | 7.64E-05 | 0.718941489 |
| P46060 | RANGAP1 | 16 | 143.4 | 138.8 | 151.8 | 56.6  | 61.2  | 48.2  | 2.53  | 2.27  | 3.15 | 2.65 | 7.72E-05 | 0.725618817 |
| P17931 | LGALS3  | 10 | 59.1  | 60.6  | 48.7  | 140.9 | 139.4 | 151.3 | 0.42  | 0.43  | 0.32 | 0.39 | 7.75E-05 | 0.72762611  |
| P68104 | EEF1A1  | 20 | 141.1 | 131.2 | 140.6 | 58.9  | 68.8  | 59.4  | 2.40  | 1.91  | 2.37 | 2.22 | 7.85E-05 | 0.735268066 |
| Q9UNN5 | FAF1    | 7  | 142.8 | 133.8 | 145.3 | 57.2  | 66.2  | 54.7  | 2.50  | 2.02  | 2.66 | 2.39 | 7.98E-05 | 0.747091864 |
| Q9NPB8 | GPCPD1  | 4  | 36.5  | 32.8  | 16.5  | 163.5 | 167.2 | 183.5 | 0.22  | 0.20  | 0.09 | 0.17 | 8.02E-05 | 0.748670935 |
| P60059 | SEC61G  | 2  | 132.5 | 127   | 136.5 | 67.5  | 73    | 63.5  | 1.96  | 1.74  | 2.15 | 1.95 | 8.03E-05 | 0.748670935 |
| P50991 | CCT4    | 35 | 130   | 133.6 | 140.2 | 70    | 66.4  | 59.8  | 1.86  | 2.01  | 2.34 | 2.07 | 8.12E-05 | 0.755361113 |
| Q15819 | UBE2V2  | 4  | 139.3 | 131.9 | 143.1 | 60.7  | 68.1  | 56.9  | 2.29  | 1.94  | 2.51 | 2.25 | 8.12E-05 | 0.755361113 |
| Q9H1C4 | UNC93B1 | 3  | 37.4  | 29.6  | 16    | 162.6 | 170.4 | 184   | 0.23  | 0.17  | 0.09 | 0.16 | 8.17E-05 | 0.758511118 |
| P80294 | MT1H    | 1  | 183.9 | 169.8 | 162.6 | 16.1  | 30.2  | 37.4  | 11.42 | 5.62  | 4.35 | 7.13 | 8.29E-05 | 0.768292909 |
| O14879 | IFIT3   | 11 | 130.5 | 138.1 | 141.2 | 69.5  | 61.9  | 58.8  | 1.88  | 2.23  | 2.40 | 2.17 | 8.32E-05 | 0.770100439 |
| Q9NUQ3 | TXLNG   | 7  | 153   | 171.5 | 160.6 | 47    | 28.5  | 39.4  | 3.26  | 6.02  | 4.08 | 4.45 | 8.39E-05 | 0.774544047 |
| P62979 | RPS27A  | 10 | 137.4 | 148.8 | 149.6 | 62.6  | 51.2  | 50.4  | 2.19  | 2.91  | 2.97 | 2.69 | 8.40E-05 | 0.774544047 |
| Q9BY44 | EIF2A   | 11 | 137.7 | 128.1 | 131.3 | 62.3  | 71.9  | 68.7  | 2.21  | 1.78  | 1.91 | 1.97 | 8.45E-05 | 0.778625204 |
| P49790 | NUP153  | 18 | 156.1 | 175.2 | 172.1 | 43.9  | 24.8  | 27.9  | 3.56  | 7.06  | 6.17 | 5.60 | 8.49E-05 | 0.780731884 |
| P49915 | GMPS    | 31 | 141.5 | 134.3 | 146.6 | 58.5  | 65.7  | 53.4  | 2.42  | 2.04  | 2.75 | 2.40 | 8.55E-05 | 0.785239977 |
| Q14839 | CHD4    | 42 | 148.9 | 142.4 | 157.4 | 51.1  | 57.6  | 42.6  | 2.91  | 2.47  | 3.69 | 3.03 | 8.62E-05 | 0.790026396 |
| Q9BT73 | PSMG3   | 5  | 173.4 | 184.9 | 162.5 | 26.6  | 15.1  | 37.5  | 6.52  | 12.25 | 4.33 | 7.70 | 8.72E-05 | 0.797652935 |
| O75368 | SH3BGRL | 5  | 68.9  | 58.2  | 65.4  | 131.1 | 141.8 | 134.6 | 0.53  | 0.41  | 0.49 | 0.47 | 8.73E-05 | 0.797652935 |
| Q8IY81 | FTSJ3   | 9  | 142.7 | 131.5 | 139.6 | 57.3  | 68.5  | 60.4  | 2.49  | 1.92  | 2.31 | 2.24 | 8.78E-05 | 0.800627257 |
| P00374 | DHFR    | 10 | 120.5 | 115.1 | 118.9 | 79.5  | 84.9  | 81.1  | 1.52  | 1.36  | 1.47 | 1.45 | 8.83E-05 | 0.804111934 |
| Q96N66 | MBOAT7  | 6  | 56.8  | 48.8  | 62.2  | 143.2 | 151.2 | 137.8 | 0.40  | 0.32  | 0.45 | 0.39 | 8.90E-05 | 0.809395371 |
| P62195 | PSMC5   | 19 | 134.6 | 125.9 | 128.1 | 65.4  | 74.1  | 71.9  | 2.06  | 1.70  | 1.78 | 1.85 | 8.94E-05 | 0.811849183 |
| Q00534 | CDK6    | 9  | 163.2 | 156.1 | 175.8 | 36.8  | 43.9  | 24.2  | 4.43  | 3.56  | 7.26 | 5.09 | 9.00E-05 | 0.815729788 |
| O94966 | USP19   | 11 | 135.5 | 135.4 | 145.8 | 64.5  | 64.6  | 54.2  | 2.10  | 2.10  | 2.69 | 2.30 | 9.04E-05 | 0.81874365  |

|        |          |    |       |       |       |       |       |       |      |      |       |      |            |             |
|--------|----------|----|-------|-------|-------|-------|-------|-------|------|------|-------|------|------------|-------------|
| P61353 | RPL27    | 8  | 131.1 | 123.1 | 125.6 | 68.9  | 76.9  | 74.4  | 1.90 | 1.60 | 1.69  | 1.73 | 9.10E-05   | 0.821293198 |
| Q7L2E3 | DHX30    | 7  | 137.9 | 127.8 | 132.8 | 62.1  | 72.2  | 67.2  | 2.22 | 1.77 | 1.98  | 1.99 | 9.09E-05   | 0.821293198 |
| Q9NRF9 | POLE3    | 4  | 144.1 | 138.7 | 152.5 | 55.9  | 61.3  | 47.5  | 2.58 | 2.26 | 3.21  | 2.68 | 9.18E-05   | 0.827077294 |
| Q9UHX1 | PUF60    | 12 | 134.6 | 131.8 | 142.6 | 65.4  | 68.2  | 57.4  | 2.06 | 1.93 | 2.48  | 2.16 | 9.19E-05   | 0.827201908 |
| P21926 | CD9      | 5  | 122.2 | 120.7 | 127.6 | 77.8  | 79.3  | 72.4  | 1.57 | 1.52 | 1.76  | 1.62 | 9.23E-05   | 0.82823153  |
| P10515 | DLAT     | 14 | 129   | 126   | 135.1 | 71    | 74    | 64.9  | 1.82 | 1.70 | 2.08  | 1.87 | 9.23E-05   | 0.82823153  |
| O75886 | STAM2    | 5  | 141.4 | 130.6 | 139.4 | 58.6  | 69.4  | 60.6  | 2.41 | 1.88 | 2.30  | 2.20 | 9.30E-05   | 0.833426629 |
| P52907 | CAPZA1   | 14 | 124.1 | 125.3 | 131.9 | 75.9  | 74.7  | 68.1  | 1.64 | 1.68 | 1.94  | 1.75 | 9.36E-05   | 0.837463968 |
| P49411 | TUFM     | 25 | 126.1 | 119.1 | 122.4 | 73.9  | 80.9  | 77.6  | 1.71 | 1.47 | 1.58  | 1.59 | 9.47E-05   | 0.845352256 |
| P43897 | TSFM     | 18 | 120.9 | 125.5 | 118.9 | 79.1  | 74.5  | 81.1  | 1.53 | 1.68 | 1.47  | 1.56 | 9.48E-05   | 0.845568248 |
| Q9ULH1 | ASAP1    | 5  | 129.6 | 137.7 | 140.3 | 70.4  | 62.3  | 59.7  | 1.84 | 2.21 | 2.35  | 2.13 | 9.51E-05   | 0.846067351 |
| P20810 | CAST     | 37 | 86.1  | 83.3  | 87.7  | 113.9 | 116.7 | 112.3 | 0.76 | 0.71 | 0.78  | 0.75 | 9.55E-05   | 0.846067351 |
| P30043 | BLVRB    | 10 | 81.6  | 75    | 76.4  | 118.4 | 125   | 123.6 | 0.69 | 0.60 | 0.62  | 0.64 | 9.54E-05   | 0.846067351 |
| Q86TB9 | PATL1    | 6  | 148.7 | 155.5 | 140.5 | 51.3  | 44.5  | 59.5  | 2.90 | 3.49 | 2.36  | 2.92 | 9.54E-05   | 0.846067351 |
| Q86TI2 | DPP9     | 17 | 158.8 | 145.1 | 145.6 | 41.2  | 54.9  | 54.4  | 3.85 | 2.64 | 2.68  | 3.06 | 9.59E-05   | 0.848346588 |
| P09651 | HNRNPA1  | 8  | 127.5 | 120.3 | 126.3 | 72.5  | 79.7  | 73.7  | 1.76 | 1.51 | 1.71  | 1.66 | 9.65E-05   | 0.851489367 |
| Q13247 | SRSF6    | 7  | 159.4 | 143.3 | 152.6 | 40.6  | 56.7  | 47.4  | 3.93 | 2.53 | 3.22  | 3.22 | 9.64E-05   | 0.851489367 |
| P43490 | NAMPT    | 30 | 25.5  | 39.2  | 44.8  | 174.5 | 160.8 | 155.2 | 0.15 | 0.24 | 0.29  | 0.23 | 9.70E-05   | 0.854381133 |
| O43657 | TSPAN6   | 4  | 62.5  | 68.5  | 72.5  | 137.5 | 131.5 | 127.5 | 0.45 | 0.52 | 0.57  | 0.51 | 9.72E-05   | 0.855410758 |
| Q14651 | PLS1     | 9  | 75.9  | 71.9  | 79.5  | 124.1 | 128.1 | 120.5 | 0.61 | 0.56 | 0.66  | 0.61 | 9.83E-05   | 0.862569596 |
| Q96QE2 | SLC2A13  | 1  | 163.4 | 150.7 | 147.4 | 36.6  | 49.3  | 52.6  | 4.46 | 3.06 | 2.80  | 3.44 | 9.84E-05   | 0.862569596 |
| Q9NR30 | DDX21    | 16 | 141.1 | 135.7 | 148.8 | 58.9  | 64.3  | 51.2  | 2.40 | 2.11 | 2.91  | 2.47 | 9.92E-05   | 0.868407173 |
| Q13464 | ROCK1    | 21 | 134.3 | 126.8 | 136.6 | 65.7  | 73.2  | 63.4  | 2.04 | 1.73 | 2.15  | 1.98 | 9.94E-05   | 0.8695515   |
| P35268 | RPL22    | 7  | 139.9 | 149.9 | 154.8 | 60.1  | 50.1  | 45.2  | 2.33 | 2.99 | 3.42  | 2.91 | 9.99E-05   | 0.872421311 |
| P05091 | ALDH2    | 27 | 32.8  | 10.4  | 10.3  | 167.2 | 189.6 | 189.7 | 0.20 | 0.05 | 0.05  | 0.10 | 0.00010041 | 0.875374114 |
| Q9ULC4 | MCTS1    | 10 | 126.9 | 119.8 | 122.1 | 73.1  | 80.2  | 77.9  | 1.74 | 1.49 | 1.57  | 1.60 | 0.00010095 | 0.878787844 |
| P61981 | YWHAG    | 17 | 86.5  | 90.1  | 87.2  | 113.5 | 109.9 | 112.8 | 0.76 | 0.82 | 0.77  | 0.79 | 0.00010151 | 0.882341882 |
| P61254 | RPL26    | 3  | 128.2 | 123   | 131.7 | 71.8  | 77    | 68.3  | 1.79 | 1.60 | 1.93  | 1.77 | 0.0001021  | 0.886075704 |
| Q9UJS0 | SLC25A13 | 14 | 131.3 | 133.3 | 141.9 | 68.7  | 66.7  | 58.1  | 1.91 | 2.00 | 2.44  | 2.12 | 0.0001027  | 0.886075704 |
| Q16822 | PCK2     | 12 | 73.6  | 73    | 80    | 126.4 | 127   | 120   | 0.58 | 0.57 | 0.67  | 0.61 | 0.00010251 | 0.886075704 |
| Q8TCT8 | SPPL2A   | 2  | 69.5  | 58.2  | 61    | 130.5 | 141.8 | 139   | 0.53 | 0.41 | 0.44  | 0.46 | 0.00010262 | 0.886075704 |
| O75663 | TIPRL    | 17 | 118.6 | 114.7 | 120.2 | 81.4  | 85.3  | 79.8  | 1.46 | 1.34 | 1.51  | 1.44 | 0.00010266 | 0.886075704 |
| Q9BW60 | ELOVL1   | 3  | 157.3 | 141.6 | 152.1 | 42.7  | 58.4  | 47.9  | 3.68 | 2.42 | 3.18  | 3.09 | 0.00010332 | 0.887587695 |
| P42166 | TMPO     | 5  | 125.5 | 119.7 | 126.9 | 74.5  | 80.3  | 73.1  | 1.68 | 1.49 | 1.74  | 1.64 | 0.00010319 | 0.887587695 |
| Q6PJT7 | ZC3H14   | 5  | 171.9 | 156   | 176.7 | 28.1  | 44    | 23.3  | 6.12 | 3.55 | 7.58  | 5.75 | 0.00010325 | 0.887587695 |
| O43175 | PHGDH    | 13 | 80.9  | 73.7  | 76    | 119.1 | 126.3 | 124   | 0.68 | 0.58 | 0.61  | 0.63 | 0.00010351 | 0.887853547 |
| Q9H1B7 | IRF2BPL  | 14 | 159.6 | 173   | 182.3 | 40.4  | 27    | 17.7  | 3.95 | 6.41 | 10.30 | 6.89 | 0.00010438 | 0.894043933 |
| Q15075 | EEA1     | 58 | 138.1 | 132.9 | 145.2 | 61.9  | 67.1  | 54.8  | 2.23 | 1.98 | 2.65  | 2.29 | 0.00010465 | 0.895026479 |
| Q9H4M9 | EHD1     | 19 | 146.6 | 134.2 | 138.2 | 53.4  | 65.8  | 61.8  | 2.75 | 2.04 | 2.24  | 2.34 | 0.00010501 | 0.896840356 |
| Q93008 | USP9X    | 37 | 117.7 | 115.7 | 112.8 | 82.3  | 84.3  | 87.2  | 1.43 | 1.37 | 1.29  | 1.37 | 0.00010614 | 0.90518739  |
| P07711 | CTSL     | 4  | 42.4  | 20.5  | 27.4  | 157.6 | 179.5 | 172.6 | 0.27 | 0.11 | 0.16  | 0.18 | 0.00010667 | 0.908368536 |

|        |          |    |       |       |       |       |       |       |       |      |       |      |            |             |
|--------|----------|----|-------|-------|-------|-------|-------|-------|-------|------|-------|------|------------|-------------|
| P00533 | EGFR     | 30 | 72.6  | 62.8  | 69.9  | 127.4 | 137.2 | 130.1 | 0.57  | 0.46 | 0.54  | 0.52 | 0.00010713 | 0.910929084 |
| Q9H2U1 | DHX36    | 11 | 127.8 | 121   | 121.6 | 72.2  | 79    | 78.4  | 1.77  | 1.53 | 1.55  | 1.62 | 0.00010732 | 0.911229044 |
| P61966 | AP1S1    | 4  | 145.6 | 143.5 | 158.1 | 54.4  | 56.5  | 41.9  | 2.68  | 2.54 | 3.77  | 3.00 | 0.00010848 | 0.918877564 |
| P34932 | HSPA4    | 58 | 125.7 | 121.7 | 130   | 74.3  | 78.3  | 70    | 1.69  | 1.55 | 1.86  | 1.70 | 0.00010853 | 0.918877564 |
| Q9H9B1 | EHMT1    | 3  | 170   | 163.8 | 186.7 | 30    | 36.2  | 13.3  | 5.67  | 4.52 | 14.04 | 8.08 | 0.00010923 | 0.923431761 |
| Q03001 | DST      | 22 | 167.9 | 151.9 | 151.9 | 32.1  | 48.1  | 48.1  | 5.23  | 3.16 | 3.16  | 3.85 | 0.00010991 | 0.927851881 |
| Q9Y676 | MRPS18B  | 6  | 121.2 | 129.3 | 124.8 | 78.8  | 70.7  | 75.2  | 1.54  | 1.83 | 1.66  | 1.68 | 0.00011067 | 0.932959213 |
| O00571 | DDX3X    | 28 | 137.2 | 126.8 | 132.7 | 62.8  | 73.2  | 67.3  | 2.18  | 1.73 | 1.97  | 1.96 | 0.00011101 | 0.934441334 |
| Q9NRN7 | AASDHPP  | 8  | 136.6 | 136.4 | 147.8 | 63.4  | 63.6  | 52.2  | 2.15  | 2.14 | 2.83  | 2.38 | 0.00011163 | 0.938348438 |
| P05204 | HMG2     | 4  | 154.5 | 139.7 | 151.9 | 45.5  | 60.3  | 48.1  | 3.40  | 2.32 | 3.16  | 2.96 | 0.00011222 | 0.941948878 |
| Q9HAB8 | PPCS     | 9  | 77.7  | 73    | 69    | 122.3 | 127   | 131   | 0.64  | 0.57 | 0.53  | 0.58 | 0.00011341 | 0.950566829 |
| P22681 | CBL      | 9  | 171.2 | 151.6 | 166.9 | 28.8  | 48.4  | 33.1  | 5.94  | 3.13 | 5.04  | 4.71 | 0.00011402 | 0.954364526 |
| Q8IY67 | RAVER1   | 6  | 148.8 | 143.6 | 159.8 | 51.2  | 56.4  | 40.2  | 2.91  | 2.55 | 3.98  | 3.14 | 0.00011435 | 0.954400719 |
| Q9UJA5 | TRMT6    | 9  | 133   | 125.7 | 124.7 | 67    | 74.3  | 75.3  | 1.99  | 1.69 | 1.66  | 1.78 | 0.00011422 | 0.954400719 |
| P11766 | ADH5     | 14 | 139.2 | 136.6 | 149.5 | 60.8  | 63.4  | 50.5  | 2.29  | 2.15 | 2.96  | 2.47 | 0.00011521 | 0.960183551 |
| O15371 | EIF3D    | 19 | 131.8 | 122.9 | 127   | 68.2  | 77.1  | 73    | 1.93  | 1.59 | 1.74  | 1.76 | 0.00011584 | 0.964125468 |
| P62304 | SNRPE    | 3  | 133.8 | 125.2 | 134.2 | 66.2  | 74.8  | 65.8  | 2.02  | 1.67 | 2.04  | 1.91 | 0.00011611 | 0.965010895 |
| Q9H3H3 | C11orf68 | 4  | 151.9 | 138.8 | 152.8 | 48.1  | 61.2  | 47.2  | 3.16  | 2.27 | 3.24  | 2.89 | 0.00011654 | 0.96716749  |
| O14964 | HGS      | 13 | 138.1 | 148.1 | 135.5 | 61.9  | 51.9  | 64.5  | 2.23  | 2.85 | 2.10  | 2.40 | 0.000117   | 0.969653032 |
| O75150 | RNF40    | 20 | 129   | 120.8 | 125.1 | 71    | 79.2  | 74.9  | 1.82  | 1.53 | 1.67  | 1.67 | 0.00011785 | 0.974989543 |
| Q6P2E9 | EDC4     | 16 | 139.8 | 129.9 | 140.9 | 60.2  | 70.1  | 59.1  | 2.32  | 1.85 | 2.38  | 2.19 | 0.00011798 | 0.974989543 |
| P35580 | MYH10    | 12 | 185   | 161   | 177   | 15    | 39    | 23    | 12.33 | 4.13 | 7.70  | 8.05 | 0.00011817 | 0.975175413 |
| P62937 | PPIA     | 12 | 130.1 | 122.3 | 130.2 | 69.9  | 77.7  | 69.8  | 1.86  | 1.57 | 1.87  | 1.77 | 0.00011879 | 0.978293105 |
| Q13144 | EIF2B5   | 6  | 143.8 | 133.3 | 145.9 | 56.2  | 66.7  | 54.1  | 2.56  | 2.00 | 2.70  | 2.42 | 0.00011888 | 0.978293105 |
| P42677 | RPS27    | 3  | 126.2 | 136.3 | 130.1 | 73.8  | 63.7  | 69.9  | 1.71  | 2.14 | 1.86  | 1.90 | 0.00011993 | 0.985538826 |
| P23246 | SFPQ     | 18 | 138.6 | 128   | 131.5 | 61.4  | 72    | 68.5  | 2.26  | 1.78 | 1.92  | 1.98 | 0.00012036 | 0.987716549 |
| P07942 | LAMB1    | 22 | 78.4  | 84.5  | 81.7  | 121.6 | 115.5 | 118.3 | 0.64  | 0.73 | 0.69  | 0.69 | 0.00012088 | 0.989615531 |
| P40925 | MDH1     | 20 | 71.2  | 79.3  | 75.8  | 128.8 | 120.7 | 124.2 | 0.55  | 0.66 | 0.61  | 0.61 | 0.00012093 | 0.989615531 |
| P21589 | NT5E     | 14 | 155.4 | 141.5 | 156.9 | 44.6  | 58.5  | 43.1  | 3.48  | 2.42 | 3.64  | 3.18 | 0.0001217  | 0.994562216 |
| Q9C0C9 | UBE2O    | 15 | 91.6  | 86.8  | 91.6  | 108.4 | 113.2 | 108.4 | 0.85  | 0.77 | 0.85  | 0.82 | 0.00090446 | 1           |
| Q9BV57 | ADI1     | 6  | 96.5  | 68.1  | 98.9  | 103.5 | 131.9 | 101.1 | 0.93  | 0.52 | 0.98  | 0.81 | 0.15691233 | 1           |
| Q04446 | GBE1     | 24 | 78.9  | 69.6  | 73.3  | 121.1 | 130.4 | 126.7 | 0.65  | 0.53 | 0.58  | 0.59 | 0.00016746 | 1           |
| P61604 | HSPE1    | 11 | 89.4  | 87.4  | 92.2  | 110.6 | 112.6 | 107.8 | 0.81  | 0.78 | 0.86  | 0.81 | 0.00046549 | 1           |
| Q9NRX4 | PHPT1    | 1  | 109.5 | 102.2 | 112.9 | 90.5  | 97.8  | 87.1  | 1.21  | 1.04 | 1.30  | 1.18 | 0.02131804 | 1           |
| P31946 | YWHAB    | 15 | 107.4 | 91    | 105.7 | 92.6  | 109   | 94.3  | 1.16  | 0.83 | 1.12  | 1.04 | 0.72929966 | 1           |
| P62258 | YWHAE    | 25 | 90.4  | 95    | 92    | 109.6 | 105   | 108   | 0.82  | 0.90 | 0.85  | 0.86 | 0.00138746 | 1           |
| P31947 | SFN      | 17 | 3.2   | 93.2  | 5     | 196.8 | 106.8 | 195   | 0.02  | 0.87 | 0.03  | 0.30 | 0.03445641 | 1           |
| P27348 | YWHAQ    | 22 | 72.7  | 88.4  | 72.5  | 127.3 | 111.6 | 127.5 | 0.57  | 0.79 | 0.57  | 0.64 | 0.00402086 | 1           |
| P63104 | YWHAZ    | 25 | 120.4 | 98.8  | 119.2 | 79.6  | 101.2 | 80.8  | 1.51  | 0.98 | 1.48  | 1.32 | 0.06114454 | 1           |
| P15428 | HPGD     | 10 | 20.7  | 116.7 | 24.2  | 179.3 | 83.3  | 175.8 | 0.12  | 1.40 | 0.14  | 0.55 | 0.10655134 | 1           |
| Q9C0C2 | TNKS1BP  | 52 | 77.5  | 71.7  | 81.2  | 122.5 | 128.3 | 118.8 | 0.63  | 0.56 | 0.68  | 0.63 | 0.00028868 | 1           |

|        |        |    |       |       |       |       |       |       |      |      |      |      |            |   |
|--------|--------|----|-------|-------|-------|-------|-------|-------|------|------|------|------|------------|---|
| Q01970 | PLCB3  | 15 | 113.2 | 121.2 | 127   | 86.8  | 78.8  | 73    | 1.30 | 1.54 | 1.74 | 1.53 | 0.00193643 | 1 |
| Q4KWH8 | PLCH1  | 1  | 160.5 | 142   | 144.7 | 39.5  | 58    | 55.3  | 4.06 | 2.45 | 2.62 | 3.04 | 0.00027401 | 1 |
| P19174 | PLCG1  | 18 | 135.3 | 121.7 | 138.9 | 64.7  | 78.3  | 61.1  | 2.09 | 1.55 | 2.27 | 1.97 | 0.00099059 | 1 |
| Q16698 | DECR1  | 15 | 117.2 | 95.3  | 119   | 82.8  | 104.7 | 81    | 1.42 | 0.91 | 1.47 | 1.26 | 0.12305644 | 1 |
| P17980 | PSMC3  | 23 | 144.1 | 125   | 122.7 | 55.9  | 75    | 77.3  | 2.58 | 1.67 | 1.59 | 1.94 | 0.00309606 | 1 |
| P43686 | PSMC4  | 23 | 165.4 | 131.6 | 141.2 | 34.6  | 68.4  | 58.8  | 4.78 | 1.92 | 2.40 | 3.04 | 0.00292577 | 1 |
| Q99460 | PSMD1  | 32 | 134.8 | 124.4 | 135.5 | 65.2  | 75.6  | 64.5  | 2.07 | 1.65 | 2.10 | 1.94 | 0.00024021 | 1 |
| O00487 | PSMD14 | 15 | 111   | 103.8 | 106.6 | 89    | 96.2  | 93.4  | 1.25 | 1.08 | 1.14 | 1.16 | 0.00855935 | 1 |
| P55036 | PSMD4  | 14 | 89.3  | 109.8 | 114.8 | 110.7 | 90.2  | 85.2  | 0.81 | 1.22 | 1.35 | 1.12 | 0.44822315 | 1 |
| P51665 | PSMD7  | 10 | 106.9 | 106.8 | 112.3 | 93.1  | 93.2  | 87.7  | 1.15 | 1.15 | 1.28 | 1.19 | 0.00251718 | 1 |
| P48556 | PSMD8  | 11 | 109.2 | 106.3 | 114.2 | 90.8  | 93.7  | 85.8  | 1.20 | 1.13 | 1.33 | 1.22 | 0.00372489 | 1 |
| O00233 | PSMD9  | 6  | 115.9 | 102.2 | 119.4 | 84.1  | 97.8  | 80.6  | 1.38 | 1.04 | 1.48 | 1.30 | 0.0280867  | 1 |
| Q13442 | PDAP1  | 10 | 142.7 | 114.2 | 131.9 | 57.3  | 85.8  | 68.1  | 2.49 | 1.33 | 1.94 | 1.92 | 0.00728682 | 1 |
| P82664 | MRPS10 | 2  | 126.2 | 102.9 | 119.2 | 73.8  | 97.1  | 80.8  | 1.71 | 1.06 | 1.48 | 1.42 | 0.02997056 | 1 |
| O60783 | MRPS14 | 2  | 121.9 | 121.1 | 107.6 | 78.1  | 78.9  | 92.4  | 1.56 | 1.53 | 1.16 | 1.42 | 0.00678301 | 1 |
| Q9Y399 | MRPS2  | 7  | 108.8 | 110.6 | 118.2 | 91.2  | 89.4  | 81.8  | 1.19 | 1.24 | 1.44 | 1.29 | 0.00353917 | 1 |
| P82921 | MRPS21 | 1  | 128.9 | 116.4 | 128.2 | 71.1  | 83.6  | 71.8  | 1.81 | 1.39 | 1.79 | 1.66 | 0.00102981 | 1 |
| P82663 | MRPS25 | 5  | 127.5 | 123.3 | 143.3 | 72.5  | 76.7  | 56.7  | 1.76 | 1.61 | 2.53 | 1.96 | 0.00188634 | 1 |
| Q9Y2Q9 | MRPS28 | 4  | 111.6 | 141.4 | 161.4 | 88.4  | 58.6  | 38.6  | 1.26 | 2.41 | 4.18 | 2.62 | 0.02034441 | 1 |
| P51398 | DAP3   | 4  | 115.3 | 128.5 | 142.2 | 84.7  | 71.5  | 57.8  | 1.36 | 1.80 | 2.46 | 1.87 | 0.00642562 | 1 |
| Q92665 | MRPS31 | 5  | 117.8 | 86.7  | 75.4  | 82.2  | 113.3 | 124.6 | 1.43 | 0.77 | 0.61 | 0.93 | 0.49634173 | 1 |
| P82930 | MRPS34 | 10 | 112.8 | 104.6 | 106.3 | 87.2  | 95.4  | 93.7  | 1.29 | 1.10 | 1.13 | 1.17 | 0.01106361 | 1 |
| P82673 | MRPS35 | 7  | 134.5 | 101.5 | 65.5  | 65.5  | 98.5  | 134.5 | 2.05 | 1.03 | 0.49 | 1.19 | 0.97339048 | 1 |
| P82909 | MRPS36 | 4  | 112.2 | 71.4  | 129.8 | 87.8  | 128.6 | 70.2  | 1.28 | 0.56 | 1.85 | 1.23 | 0.73344581 | 1 |
| Q9Y2R9 | MRPS7  | 13 | 109.5 | 111.9 | 76.4  | 90.5  | 88.1  | 123.6 | 1.21 | 1.27 | 0.62 | 1.03 | 0.9322096  | 1 |
| O43598 | DNPH1  | 7  | 123.7 | 99.2  | 118.7 | 76.3  | 100.8 | 81.3  | 1.62 | 0.98 | 1.46 | 1.36 | 0.05856492 | 1 |
| Q5HYK3 | COQ5   | 5  | 125.6 | 86.1  | 73.6  | 74.4  | 113.9 | 126.4 | 1.69 | 0.76 | 0.58 | 1.01 | 0.68120649 | 1 |
| Q02218 | OGDH   | 32 | 133.8 | 126.8 | 137.6 | 66.2  | 73.2  | 62.4  | 2.02 | 1.73 | 2.21 | 1.99 | 0.0001268  | 1 |
| P21953 | BCKDHB | 5  | 124   | 97.9  | 128.3 | 76    | 102.1 | 71.7  | 1.63 | 0.96 | 1.79 | 1.46 | 0.06737679 | 1 |
| O95861 | BPNT1  | 8  | 143.4 | 87.7  | 113.9 | 56.6  | 112.3 | 86.1  | 2.53 | 0.78 | 1.32 | 1.55 | 0.25775585 | 1 |
| Q9BYD6 | MRPL1  | 14 | 109.9 | 99.2  | 116.4 | 90.1  | 100.8 | 83.6  | 1.22 | 0.98 | 1.39 | 1.20 | 0.07457439 | 1 |
| Q7Z7H8 | MRPL10 | 6  | 80.5  | 113.2 | 79.2  | 119.5 | 86.8  | 120.8 | 0.67 | 1.30 | 0.66 | 0.88 | 0.31476316 | 1 |
| Q9Y3B7 | MRPL11 | 7  | 108.2 | 110.6 | 135.7 | 91.8  | 89.4  | 64.3  | 1.18 | 1.24 | 2.11 | 1.51 | 0.04317932 | 1 |
| P52815 | MRPL12 | 5  | 92.8  | 80.1  | 78.9  | 107.2 | 119.9 | 121.1 | 0.87 | 0.67 | 0.65 | 0.73 | 0.00693599 | 1 |
| Q9BYD1 | MRPL13 | 8  | 109.5 | 100.8 | 120.5 | 90.5  | 99.2  | 79.5  | 1.21 | 1.02 | 1.52 | 1.25 | 0.06348527 | 1 |
| Q9P015 | MRPL15 | 10 | 95.4  | 111.1 | 82.8  | 104.6 | 88.9  | 117.2 | 0.91 | 1.25 | 0.71 | 0.96 | 0.57110658 | 1 |
| Q9NX20 | MRPL16 | 7  | 75.8  | 107.8 | 113.6 | 124.2 | 92.2  | 86.4  | 0.61 | 1.17 | 1.31 | 1.03 | 0.91599252 | 1 |
| P49406 | MRPL19 | 11 | 94.2  | 95.1  | 79.4  | 105.8 | 104.9 | 120.6 | 0.89 | 0.91 | 0.66 | 0.82 | 0.04416967 | 1 |
| Q7Z2W9 | MRPL21 | 4  | 110.7 | 118.3 | 77.4  | 89.3  | 81.7  | 122.6 | 1.24 | 1.45 | 0.63 | 1.11 | 0.82197547 | 1 |
| Q9NWU5 | MRPL22 | 7  | 106.8 | 90.3  | 93    | 93.2  | 109.7 | 107   | 1.15 | 0.82 | 0.87 | 0.95 | 0.41274207 | 1 |
| Q96A35 | MRPL24 | 10 | 88.7  | 93.3  | 87.3  | 111.3 | 106.7 | 112.7 | 0.80 | 0.87 | 0.77 | 0.82 | 0.00133307 | 1 |



|        |          |    |       |       |       |       |       |       |      |      |      |      |            |   |
|--------|----------|----|-------|-------|-------|-------|-------|-------|------|------|------|------|------------|---|
| Q9P0M9 | MRPL27   | 3  | 118.6 | 109.2 | 117.2 | 81.4  | 90.8  | 82.8  | 1.46 | 1.20 | 1.42 | 1.36 | 0.00192657 | 1 |
| Q13084 | MRPL28   | 10 | 103.2 | 100.2 | 103.4 | 96.8  | 99.8  | 96.6  | 1.07 | 1.00 | 1.07 | 1.05 | 0.03631555 | 1 |
| P09001 | MRPL3    | 8  | 73.2  | 95.6  | 94.1  | 126.8 | 104.4 | 105.9 | 0.58 | 0.92 | 0.89 | 0.79 | 0.07283531 | 1 |
| Q9BYC8 | MRPL32   | 2  | 110   | 109.7 | 120.2 | 90    | 90.3  | 79.8  | 1.22 | 1.21 | 1.51 | 1.31 | 0.00550584 | 1 |
| Q9NYK5 | MRPL39   | 13 | 110.3 | 96    | 97.6  | 89.7  | 104   | 102.4 | 1.23 | 0.92 | 0.95 | 1.04 | 0.70524185 | 1 |
| Q9BYD3 | MRPL4    | 9  | 98.7  | 82.8  | 108.1 | 101.3 | 117.2 | 91.9  | 0.97 | 0.71 | 1.18 | 0.95 | 0.54300531 | 1 |
| Q9NQ50 | MRPL40   | 4  | 111.6 | 92.4  | 104.8 | 88.4  | 107.6 | 95.2  | 1.26 | 0.86 | 1.10 | 1.07 | 0.50143369 | 1 |
| Q8IXM3 | MRPL41   | 5  | 116.8 | 95.5  | 164.4 | 83.2  | 104.5 | 35.6  | 1.40 | 0.91 | 4.62 | 2.31 | 0.15051344 | 1 |
| Q8N983 | MRPL43   | 4  | 109.9 | 101.2 | 125.5 | 90.1  | 98.8  | 74.5  | 1.22 | 1.02 | 1.68 | 1.31 | 0.07220133 | 1 |
| Q9H9J2 | MRPL44   | 14 | 88.8  | 101   | 93.4  | 111.2 | 99    | 106.6 | 0.80 | 1.02 | 0.88 | 0.90 | 0.08997132 | 1 |
| Q9BRJ2 | MRPL45   | 8  | 79.3  | 100.5 | 89    | 120.7 | 99.5  | 111   | 0.66 | 1.01 | 0.80 | 0.82 | 0.07432483 | 1 |
| Q9H2W6 | MRPL46   | 8  | 61.8  | 83    | 55.4  | 138.2 | 117   | 144.6 | 0.45 | 0.71 | 0.38 | 0.51 | 0.00486295 | 1 |
| Q9HD33 | MRPL47   | 6  | 122.4 | 133   | 100   | 77.6  | 67    | 100   | 1.58 | 1.99 | 1.00 | 1.52 | 0.05495205 | 1 |
| Q96GC5 | MRPL48   | 5  | 103.5 | 110.9 | 112.7 | 96.5  | 89.1  | 87.3  | 1.07 | 1.24 | 1.29 | 1.20 | 0.01051192 | 1 |
| Q4U2R6 | MRPL51   | 1  | 88.6  | 92.5  | 120   | 111.4 | 107.5 | 80    | 0.80 | 0.86 | 1.50 | 1.05 | 0.96066338 | 1 |
| Q96EL3 | MRPL53   | 1  | 81.7  | 55.6  | 68.3  | 118.3 | 144.4 | 131.7 | 0.69 | 0.39 | 0.52 | 0.53 | 0.00411459 | 1 |
| Q9BYD2 | MRPL9    | 8  | 110.9 | 118.1 | 135.3 | 89.1  | 81.9  | 64.7  | 1.24 | 1.44 | 2.09 | 1.59 | 0.0138321  | 1 |
| Q9NVS2 | MRPS18A  | 5  | 111.7 | 105.5 | 114.2 | 88.3  | 94.5  | 85.8  | 1.27 | 1.12 | 1.33 | 1.24 | 0.00461146 | 1 |
| Q15125 | EBP      | 1  | 84.6  | 101.8 | 105.9 | 115.4 | 98.2  | 94.1  | 0.73 | 1.04 | 1.13 | 0.97 | 0.60765603 | 1 |
| Q99714 | HSD17B1C | 16 | 99.2  | 85.2  | 95    | 100.8 | 114.8 | 105   | 0.98 | 0.74 | 0.90 | 0.88 | 0.07927324 | 1 |
| Q9BUT1 | BDH2     | 3  | 99.9  | 75.7  | 97.5  | 100.1 | 124.3 | 102.5 | 1.00 | 0.61 | 0.95 | 0.85 | 0.17484124 | 1 |
| P31937 | HIBADH   | 13 | 35.9  | 53.5  | 48.6  | 164.1 | 146.5 | 151.4 | 0.22 | 0.37 | 0.32 | 0.30 | 0.00012935 | 1 |
| P42765 | ACAA2    | 13 | 74.7  | 92.2  | 93.4  | 125.3 | 107.8 | 106.6 | 0.60 | 0.86 | 0.88 | 0.78 | 0.03633393 | 1 |
| P09110 | ACAA1    | 5  | 40.7  | 97.4  | 78.1  | 159.3 | 102.6 | 121.9 | 0.26 | 0.95 | 0.64 | 0.62 | 0.07652753 | 1 |
| Q06136 | KDSR     | 3  | 136.8 | 88.2  | 139.3 | 63.2  | 111.8 | 60.7  | 2.16 | 0.79 | 2.29 | 1.75 | 0.14247386 | 1 |
| P62280 | RPS11    | 13 | 121   | 86.6  | 119.5 | 79    | 113.4 | 80.5  | 1.53 | 0.76 | 1.48 | 1.26 | 0.31862423 | 1 |
| P25398 | RPS12    | 7  | 125.8 | 104.4 | 125.8 | 74.2  | 95.6  | 74.2  | 1.70 | 1.09 | 1.70 | 1.49 | 0.02082184 | 1 |
| P62277 | RPS13    | 12 | 123.4 | 113.4 | 120   | 76.6  | 86.6  | 80    | 1.61 | 1.31 | 1.50 | 1.47 | 0.00080158 | 1 |
| P62244 | RPS15A   | 7  | 122.2 | 115   | 119.5 | 77.8  | 85    | 80.5  | 1.57 | 1.35 | 1.48 | 1.47 | 0.00021951 | 1 |
| P62249 | RPS16    | 15 | 122.7 | 130.1 | 119.4 | 77.3  | 69.9  | 80.6  | 1.59 | 1.86 | 1.48 | 1.64 | 0.00042315 | 1 |
| P08708 | RPS17    | 11 | 119.3 | 110.2 | 114.2 | 80.7  | 89.8  | 85.8  | 1.48 | 1.23 | 1.33 | 1.35 | 0.0014414  | 1 |
| P62269 | RPS18    | 13 | 118.6 | 109.5 | 124.6 | 81.4  | 90.5  | 75.4  | 1.46 | 1.21 | 1.65 | 1.44 | 0.0048041  | 1 |
| P39019 | RPS19    | 15 | 122.3 | 116.6 | 116.4 | 77.7  | 83.4  | 83.6  | 1.57 | 1.40 | 1.39 | 1.45 | 0.00017535 | 1 |
| P15880 | RPS2     | 15 | 89.9  | 110.1 | 97.1  | 110.1 | 89.9  | 102.9 | 0.82 | 1.22 | 0.94 | 0.99 | 0.82844393 | 1 |
| P60866 | RPS20    | 5  | 124   | 114.7 | 124.5 | 76    | 85.3  | 75.5  | 1.63 | 1.34 | 1.65 | 1.54 | 0.00072879 | 1 |
| P63220 | RPS21    | 5  | 122.8 | 106.4 | 112   | 77.2  | 93.6  | 88    | 1.59 | 1.14 | 1.27 | 1.33 | 0.01566423 | 1 |
| P62266 | RPS23    | 7  | 123.8 | 114.6 | 122.4 | 76.2  | 85.4  | 77.6  | 1.62 | 1.34 | 1.58 | 1.51 | 0.00055888 | 1 |
| P62847 | RPS24    | 5  | 120.7 | 118.4 | 112.3 | 79.3  | 81.6  | 87.7  | 1.52 | 1.45 | 1.28 | 1.42 | 0.00064038 | 1 |
| P62854 | RPS26    | 5  | 124.4 | 110.5 | 125.6 | 75.6  | 89.5  | 74.4  | 1.65 | 1.23 | 1.69 | 1.52 | 0.00416594 | 1 |
| Q71UM5 | RPS27L   | 2  | 71.7  | 61.5  | 93.3  | 128.3 | 138.5 | 106.7 | 0.56 | 0.44 | 0.87 | 0.63 | 0.02090788 | 1 |
| P62857 | RPS28    | 5  | 121.2 | 112.2 | 111.3 | 78.8  | 87.8  | 88.7  | 1.54 | 1.28 | 1.25 | 1.36 | 0.00263021 | 1 |

|        |         |    |       |       |       |       |       |       |      |      |      |      |            |   |
|--------|---------|----|-------|-------|-------|-------|-------|-------|------|------|------|------|------------|---|
| P62273 | RPS29   | 3  | 118.3 | 108   | 128.6 | 81.7  | 92    | 71.4  | 1.45 | 1.17 | 1.80 | 1.47 | 0.01213797 | 1 |
| P23396 | RPS3    | 24 | 102.7 | 114.4 | 100.1 | 97.3  | 85.6  | 99.9  | 1.06 | 1.34 | 1.00 | 1.13 | 0.13900679 | 1 |
| P62861 | FAU     | 3  | 124.7 | 99.5  | 135.4 | 75.3  | 100.5 | 64.6  | 1.66 | 0.99 | 2.10 | 1.58 | 0.05756792 | 1 |
| P61247 | RPS3A   | 30 | 87.6  | 108.9 | 84.7  | 112.4 | 91.1  | 115.3 | 0.78 | 1.20 | 0.73 | 0.90 | 0.30998431 | 1 |
| P62701 | RPS4X   | 15 | 97.3  | 116.1 | 100.1 | 102.7 | 83.9  | 99.9  | 0.95 | 1.38 | 1.00 | 1.11 | 0.33825905 | 1 |
| P46782 | RPS5    | 14 | 118.8 | 118   | 109.6 | 81.2  | 82    | 90.4  | 1.46 | 1.44 | 1.21 | 1.37 | 0.00174848 | 1 |
| P62753 | RPS6    | 19 | 76.2  | 116   | 89.2  | 123.8 | 84    | 110.8 | 0.62 | 1.38 | 0.81 | 0.93 | 0.49587188 | 1 |
| P62241 | RPS8    | 17 | 95.9  | 110.4 | 88.9  | 104.1 | 89.6  | 111.1 | 0.92 | 1.23 | 0.80 | 0.98 | 0.73885277 | 1 |
| P08865 | RPSA    | 16 | 115.9 | 118.7 | 124   | 84.1  | 81.3  | 76    | 1.38 | 1.46 | 1.63 | 1.49 | 0.00031233 | 1 |
| Q9H0D6 | XRN2    | 25 | 105.3 | 91.8  | 99.4  | 94.7  | 108.2 | 100.6 | 1.11 | 0.85 | 0.99 | 0.98 | 0.69454759 | 1 |
| Q13131 | PRKAA1  | 7  | 132.8 | 128.9 | 114.4 | 67.2  | 71.1  | 85.6  | 1.98 | 1.81 | 1.34 | 1.71 | 0.00304566 | 1 |
| P54619 | PRKAG1  | 11 | 128.6 | 93.1  | 121.3 | 71.4  | 106.9 | 78.7  | 1.80 | 0.87 | 1.54 | 1.40 | 0.13440094 | 1 |
| P49914 | MTHFS   | 6  | 71.2  | 115.4 | 47.4  | 128.8 | 84.6  | 152.6 | 0.55 | 1.36 | 0.31 | 0.74 | 0.19338371 | 1 |
| O14841 | OPLAH   | 13 | 100.3 | 41.8  | 25.8  | 99.7  | 158.2 | 174.2 | 1.01 | 0.26 | 0.15 | 0.47 | 0.05136288 | 1 |
| P56378 | MP68    | 2  | 94.9  | 108.3 | 147.7 | 105.1 | 91.7  | 52.3  | 0.90 | 1.18 | 2.82 | 1.64 | 0.20453403 | 1 |
| P10809 | HSPD1   | 58 | 98.8  | 93.5  | 100.5 | 101.2 | 106.5 | 99.5  | 0.98 | 0.88 | 1.01 | 0.95 | 0.18264829 | 1 |
| P05388 | RPLP0   | 16 | 100.5 | 126.9 | 102.2 | 99.5  | 73.1  | 97.8  | 1.01 | 1.74 | 1.04 | 1.26 | 0.17724864 | 1 |
| P05387 | RPLP2   | 8  | 118.3 | 111.7 | 122.4 | 81.7  | 88.3  | 77.6  | 1.45 | 1.27 | 1.58 | 1.43 | 0.00137196 | 1 |
| P27635 | RPL10   | 14 | 111.8 | 106.3 | 96.4  | 88.2  | 93.7  | 103.6 | 1.27 | 1.13 | 0.93 | 1.11 | 0.20385077 | 1 |
| P62906 | RPL10A  | 13 | 86.7  | 129.5 | 94.8  | 113.3 | 70.5  | 105.2 | 0.77 | 1.84 | 0.90 | 1.17 | 0.71297822 | 1 |
| P62913 | RPL11   | 5  | 130.4 | 119.3 | 127.4 | 69.6  | 80.7  | 72.6  | 1.87 | 1.48 | 1.75 | 1.70 | 0.00039323 | 1 |
| P26373 | RPL13   | 18 | 115   | 122.8 | 85.8  | 85    | 77.2  | 114.2 | 1.35 | 1.59 | 0.75 | 1.23 | 0.37910205 | 1 |
| P50914 | RPL14   | 7  | 114.3 | 96.5  | 88.8  | 85.7  | 103.5 | 111.2 | 1.33 | 0.93 | 0.80 | 1.02 | 0.98127418 | 1 |
| P61313 | RPL15   | 10 | 123.9 | 143.5 | 109.4 | 76.1  | 56.5  | 90.6  | 1.63 | 2.54 | 1.21 | 1.79 | 0.02150078 | 1 |
| Q07020 | RPL18   | 10 | 123.1 | 112.3 | 126   | 76.9  | 87.7  | 74    | 1.60 | 1.28 | 1.70 | 1.53 | 0.00225914 | 1 |
| Q02543 | RPL18A  | 10 | 126.1 | 108.1 | 127   | 73.9  | 91.9  | 73    | 1.71 | 1.18 | 1.74 | 1.54 | 0.00939958 | 1 |
| P84098 | RPL19   | 10 | 103.1 | 117.6 | 86.8  | 96.9  | 82.4  | 113.2 | 1.06 | 1.43 | 0.77 | 1.09 | 0.7113538  | 1 |
| P46778 | RPL21   | 10 | 129.4 | 121.4 | 129.9 | 70.6  | 78.6  | 70.1  | 1.83 | 1.54 | 1.85 | 1.74 | 0.00015914 | 1 |
| Q9UNX3 | RPL26L1 | 2  | 147.2 | 158.7 | 115.1 | 52.8  | 41.3  | 84.9  | 2.79 | 3.84 | 1.36 | 2.66 | 0.0119477  | 1 |
| P46776 | RPL27A  | 6  | 127.3 | 116.5 | 138.9 | 72.7  | 83.5  | 61.1  | 1.75 | 1.40 | 2.27 | 1.81 | 0.00381759 | 1 |
| P47914 | RPL29   | 3  | 130.2 | 140.5 | 127.4 | 69.8  | 59.5  | 72.6  | 1.87 | 2.36 | 1.75 | 1.99 | 0.00031442 | 1 |
| P62888 | RPL30   | 9  | 129.1 | 120.6 | 127.2 | 70.9  | 79.4  | 72.8  | 1.82 | 1.52 | 1.75 | 1.70 | 0.00014791 | 1 |
| P62899 | RPL31   | 7  | 130   | 129.3 | 117.6 | 70    | 70.7  | 82.4  | 1.86 | 1.83 | 1.43 | 1.70 | 0.0008389  | 1 |
| P49207 | RPL34   | 7  | 130.3 | 121.1 | 131.4 | 69.7  | 78.9  | 68.6  | 1.87 | 1.53 | 1.92 | 1.77 | 0.0002807  | 1 |
| P42766 | RPL35   | 5  | 130.3 | 116.3 | 132.3 | 69.7  | 83.7  | 67.7  | 1.87 | 1.39 | 1.95 | 1.74 | 0.00178817 | 1 |
| Q9Y3U8 | RPL36   | 5  | 129.2 | 116.9 | 126.1 | 70.8  | 83.1  | 73.9  | 1.82 | 1.41 | 1.71 | 1.65 | 0.00077051 | 1 |
| Q969Q0 | RPL36AL | 2  | 122.2 | 121.5 | 115.7 | 77.8  | 78.5  | 84.3  | 1.57 | 1.55 | 1.37 | 1.50 | 0.00016957 | 1 |
| P61513 | RPL37A  | 6  | 127.5 | 122.6 | 115.5 | 72.5  | 77.4  | 84.5  | 1.76 | 1.58 | 1.37 | 1.57 | 0.00088946 | 1 |
| P63173 | RPL38   | 5  | 135.7 | 139.8 | 116.4 | 64.3  | 60.2  | 83.6  | 2.11 | 2.32 | 1.39 | 1.94 | 0.00387086 | 1 |
| P36578 | RPL4    | 24 | 178.1 | 127.6 | 156.3 | 21.9  | 72.4  | 43.7  | 8.13 | 1.76 | 3.58 | 4.49 | 0.00641742 | 1 |
| P46777 | RPL5    | 27 | 107.1 | 125.2 | 109.7 | 92.9  | 74.8  | 90.3  | 1.15 | 1.67 | 1.21 | 1.35 | 0.02480168 | 1 |

|        |        |    |       |       |       |       |       |       |      |       |      |       |            |   |
|--------|--------|----|-------|-------|-------|-------|-------|-------|------|-------|------|-------|------------|---|
| Q02878 | RPL6   | 20 | 99.5  | 130   | 97.7  | 100.5 | 70    | 102.3 | 0.99 | 1.86  | 0.96 | 1.27  | 0.28827053 | 1 |
| P18124 | RPL7   | 20 | 94.6  | 128.6 | 96.5  | 105.4 | 71.4  | 103.5 | 0.90 | 1.80  | 0.93 | 1.21  | 0.447224   | 1 |
| P62424 | RPL7A  | 18 | 91.4  | 123.4 | 86.6  | 108.6 | 76.6  | 113.4 | 0.84 | 1.61  | 0.76 | 1.07  | 0.95717448 | 1 |
| P62917 | RPL8   | 16 | 92.6  | 119.6 | 84.2  | 107.4 | 80.4  | 115.8 | 0.86 | 1.49  | 0.73 | 1.03  | 0.88143595 | 1 |
| P32969 | RPL9   | 6  | 127.9 | 99.9  | 131.3 | 72.1  | 100.1 | 68.7  | 1.77 | 1.00  | 1.91 | 1.56  | 0.04879099 | 1 |
| Q9Y221 | NIP7   | 3  | 179.3 | 190.8 | 130.7 | 20.7  | 9.2   | 69.3  | 8.66 | 20.74 | 1.89 | 10.43 | 0.00679438 | 1 |
| O95336 | PGLS   | 13 | 124.4 | 111.9 | 119   | 75.6  | 88.1  | 81    | 1.65 | 1.27  | 1.47 | 1.46  | 0.00196988 | 1 |
| Q9UBM7 | DHCR7  | 5  | 98.3  | 77.3  | 92.3  | 101.7 | 122.7 | 107.7 | 0.97 | 0.63  | 0.86 | 0.82  | 0.07252171 | 1 |
| Q7L2J0 | MEPCE  | 7  | 143.4 | 124.7 | 143.7 | 56.6  | 75.3  | 56.3  | 2.53 | 1.66  | 2.55 | 2.25  | 0.00110575 | 1 |
| Q8IZP0 | ABII   | 6  | 102.6 | 112.2 | 85.8  | 97.4  | 87.8  | 114.2 | 1.05 | 1.28  | 0.75 | 1.03  | 0.97251136 | 1 |
| Q86V21 | AACS   | 3  | 85    | 109.3 | 95.2  | 115   | 90.7  | 104.8 | 0.74 | 1.21  | 0.91 | 0.95  | 0.52103842 | 1 |
| A1L0T0 | ILVBL  | 5  | 128.2 | 133   | 147.4 | 71.8  | 67    | 52.6  | 1.79 | 1.99  | 2.80 | 2.19  | 0.00089069 | 1 |
| P24752 | ACAT1  | 19 | 133.4 | 110   | 113.7 | 66.6  | 90    | 86.3  | 2.00 | 1.22  | 1.32 | 1.51  | 0.02071867 | 1 |
| Q13085 | ACACA  | 40 | 96.8  | 92.5  | 99.3  | 103.2 | 107.5 | 100.7 | 0.94 | 0.86  | 0.99 | 0.93  | 0.05374576 | 1 |
| Q9NR19 | ACSS2  | 4  | 130.7 | 108.4 | 102.8 | 69.3  | 91.6  | 97.2  | 1.89 | 1.18  | 1.06 | 1.38  | 0.0813231  | 1 |
| P39687 | ANP32A | 10 | 114.8 | 100.5 | 109.1 | 85.2  | 99.5  | 90.9  | 1.35 | 1.01  | 1.20 | 1.19  | 0.05046209 | 1 |
| Q92688 | ANP32B | 7  | 117.3 | 95.1  | 118.2 | 82.7  | 104.9 | 81.8  | 1.42 | 0.91  | 1.44 | 1.26  | 0.12882562 | 1 |
| Q9BTT0 | ANP32E | 8  | 95.1  | 91.2  | 116.7 | 104.9 | 108.8 | 83.3  | 0.91 | 0.84  | 1.40 | 1.05  | 0.86713135 | 1 |
| P68032 | ACTC1  | 4  | 97    | 102.4 | 102.6 | 103   | 97.6  | 97.4  | 0.94 | 1.05  | 1.05 | 1.01  | 0.63434101 | 1 |
| P60709 | ACTB   | 10 | 100.1 | 100.6 | 102.8 | 99.9  | 99.4  | 97.2  | 1.00 | 1.01  | 1.06 | 1.02  | 0.11752165 | 1 |
| P61160 | ACTR2  | 11 | 114.4 | 108   | 115.5 | 85.6  | 92    | 84.5  | 1.34 | 1.17  | 1.37 | 1.29  | 0.00157618 | 1 |
| O15143 | ARPC1B | 16 | 106.5 | 82.6  | 105.9 | 93.5  | 117.4 | 94.1  | 1.14 | 0.70  | 1.13 | 0.99  | 0.77944146 | 1 |
| O15144 | ARPC2  | 23 | 103.8 | 103   | 105.1 | 96.2  | 97    | 94.9  | 1.08 | 1.06  | 1.11 | 1.08  | 0.00078609 | 1 |
| O15145 | ARPC3  | 7  | 118   | 95.5  | 110.5 | 82    | 104.5 | 89.5  | 1.44 | 0.91  | 1.23 | 1.20  | 0.16235099 | 1 |
| P59998 | ARPC4  | 6  | 113   | 131.7 | 104.1 | 87    | 68.3  | 95.9  | 1.30 | 1.93  | 1.09 | 1.44  | 0.04741723 | 1 |
| O15511 | ARPC5  | 2  | 88.1  | 82.5  | 96.9  | 111.9 | 117.5 | 103.1 | 0.79 | 0.70  | 0.94 | 0.81  | 0.02166397 | 1 |
| O95433 | AHSA1  | 13 | 28.5  | 125.5 | 132.7 | 171.5 | 74.5  | 67.3  | 0.17 | 1.68  | 1.97 | 1.27  | 0.86104832 | 1 |
| Q12979 | ABR    | 6  | 113.7 | 95.6  | 168.9 | 86.3  | 104.4 | 31.1  | 1.32 | 0.92  | 5.43 | 2.55  | 0.16979783 | 1 |
| P13798 | APEH   | 9  | 118.2 | 110   | 114.5 | 81.8  | 90    | 85.5  | 1.44 | 1.22  | 1.34 | 1.34  | 0.00105529 | 1 |
| O00767 | SCD    | 4  | 110.2 | 113   | 95.8  | 89.8  | 87    | 104.2 | 1.23 | 1.30  | 0.92 | 1.15  | 0.16806642 | 1 |
| Q96CM8 | ACSF2  | 6  | 107.3 | 95.8  | 111.7 | 92.7  | 104.2 | 88.3  | 1.16 | 0.92  | 1.27 | 1.11  | 0.2150259  | 1 |
| P07108 | DBI    | 6  | 112.3 | 104.1 | 129.4 | 87.7  | 95.9  | 70.6  | 1.28 | 1.09  | 1.83 | 1.40  | 0.04424987 | 1 |
| Q9NPJ3 | ACOT13 | 3  | 84.7  | 113.8 | 136   | 115.3 | 86.2  | 64    | 0.73 | 1.32  | 2.13 | 1.39  | 0.33505853 | 1 |
| P07311 | ACYP1  | 3  | 140.9 | 138.8 | 95.8  | 59.1  | 61.2  | 104.2 | 2.38 | 2.27  | 0.92 | 1.86  | 0.07261809 | 1 |
| O75608 | LYPLA1 | 5  | 128.9 | 108.1 | 142.2 | 71.1  | 91.9  | 57.8  | 1.81 | 1.18  | 2.46 | 1.82  | 0.01973135 | 1 |
| Q6P587 | FAHD1  | 6  | 88.5  | 76.9  | 100.4 | 111.5 | 123.1 | 99.6  | 0.79 | 0.62  | 1.01 | 0.81  | 0.07628237 | 1 |
| P46108 | CRK    | 11 | 93    | 69.6  | 93.3  | 107   | 130.4 | 106.7 | 0.87 | 0.53  | 0.87 | 0.76  | 0.05709429 | 1 |
| Q9NVZ3 | NECAP2 | 7  | 165.8 | 119.9 | 147.9 | 34.2  | 80.1  | 52.1  | 4.85 | 1.50  | 2.84 | 3.06  | 0.0092041  | 1 |
| P07741 | APRT   | 9  | 117.3 | 100.7 | 121   | 82.7  | 99.3  | 79    | 1.42 | 1.01  | 1.53 | 1.32  | 0.04216583 | 1 |
| Q96HN2 | AHCYL2 | 2  | 127.5 | 106.2 | 122   | 72.5  | 93.8  | 78    | 1.76 | 1.13  | 1.56 | 1.48  | 0.0146958  | 1 |
| P23526 | AHCY   | 22 | 144.5 | 112   | 122.9 | 55.5  | 88    | 77.1  | 2.60 | 1.27  | 1.59 | 1.82  | 0.01725712 | 1 |

|        |         |    |       |       |       |       |       |       |       |       |      |       |            |   |
|--------|---------|----|-------|-------|-------|-------|-------|-------|-------|-------|------|-------|------------|---|
| P54819 | AK2     | 15 | 124.7 | 99    | 126.1 | 75.3  | 101   | 73.9  | 1.66  | 0.98  | 1.71 | 1.45  | 0.05610243 | 1 |
| P27144 | AK4     | 9  | 101.6 | 123   | 146.2 | 98.4  | 77    | 53.8  | 1.03  | 1.60  | 2.72 | 1.78  | 0.06058284 | 1 |
| Q01518 | CAP1    | 31 | 115.9 | 143.6 | 143.7 | 84.1  | 56.4  | 56.3  | 1.38  | 2.55  | 2.55 | 2.16  | 0.00625739 | 1 |
| P12235 | SLC25A4 | 2  | 63.7  | 87.8  | 90.7  | 136.3 | 112.2 | 109.3 | 0.47  | 0.78  | 0.83 | 0.69  | 0.03340933 | 1 |
| P05141 | SLC25A5 | 8  | 88.3  | 101.5 | 88.8  | 111.7 | 98.5  | 111.2 | 0.79  | 1.03  | 0.80 | 0.87  | 0.07975307 | 1 |
| P12236 | SLC25A6 | 3  | 98.8  | 114.3 | 90.8  | 101.2 | 85.7  | 109.2 | 0.98  | 1.33  | 0.83 | 1.05  | 0.80301346 | 1 |
| P84077 | ARF1    | 8  | 99.7  | 91    | 90.4  | 100.3 | 109   | 109.6 | 0.99  | 0.83  | 0.82 | 0.88  | 0.04135242 | 1 |
| P18085 | ARF4    | 6  | 127.2 | 197   | 120.7 | 72.8  | 3     | 79.3  | 1.75  | 65.67 | 1.52 | 22.98 | 0.04896588 | 1 |
| P84085 | ARF5    | 5  | 108.4 | 90.7  | 24.8  | 91.6  | 109.3 | 175.2 | 1.18  | 0.83  | 0.14 | 0.72  | 0.23123858 | 1 |
| P62330 | ARF6    | 4  | 73.8  | 67.1  | 79.9  | 126.2 | 132.9 | 120.1 | 0.58  | 0.50  | 0.67 | 0.58  | 0.00054067 | 1 |
| Q8N6H7 | ARFGAP2 | 7  | 145.3 | 129.6 | 139.2 | 54.7  | 70.4  | 60.8  | 2.66  | 1.84  | 2.29 | 2.26  | 0.00029808 | 1 |
| P40616 | ARL1    | 2  | 128.6 | 84.6  | 119.9 | 71.4  | 115.4 | 80.1  | 1.80  | 0.73  | 1.50 | 1.34  | 0.31062843 | 1 |
| P36404 | ARL2    | 4  | 98.3  | 100.5 | 63.9  | 101.7 | 99.5  | 136.1 | 0.97  | 1.01  | 0.47 | 0.82  | 0.21202404 | 1 |
| Q15041 | ARL6IP1 | 4  | 114.9 | 116   | 122.8 | 85.1  | 84    | 77.2  | 1.35  | 1.38  | 1.59 | 1.44  | 0.00051136 | 1 |
| Q9UKK9 | NUDT5   | 12 | 124.1 | 98.7  | 120.8 | 75.9  | 101.3 | 79.2  | 1.64  | 0.97  | 1.53 | 1.38  | 0.06148278 | 1 |
| Q9Y4W6 | AFG3L2  | 7  | 157.7 | 112.6 | 149   | 42.3  | 87.4  | 51    | 3.73  | 1.29  | 2.92 | 2.65  | 0.01520722 | 1 |
| O43488 | AKR7A2  | 10 | 110.7 | 91.4  | 108.9 | 89.3  | 108.6 | 91.1  | 1.24  | 0.84  | 1.20 | 1.09  | 0.44696804 | 1 |
| O00170 | AIP     | 15 | 111.4 | 99.3  | 108   | 88.6  | 100.7 | 92    | 1.26  | 0.99  | 1.17 | 1.14  | 0.07069665 | 1 |
| Q92667 | AKAP1   | 5  | 91.6  | 71    | 94    | 108.4 | 129   | 106   | 0.85  | 0.55  | 0.89 | 0.76  | 0.0486753  | 1 |
| Q12802 | AKAP13  | 19 | 95.8  | 85    | 89.4  | 104.2 | 115   | 110.6 | 0.92  | 0.74  | 0.81 | 0.82  | 0.01098718 | 1 |
| Q99996 | AKAP9   | 5  | 144   | 160.7 | 175.8 | 56    | 39.3  | 24.2  | 2.57  | 4.09  | 7.26 | 4.64  | 0.00075466 | 1 |
| P49588 | AARS    | 56 | 104.1 | 98.4  | 106.3 | 95.9  | 101.6 | 93.7  | 1.09  | 0.97  | 1.13 | 1.06  | 0.15280744 | 1 |
| P14550 | AKR1A1  | 10 | 77.7  | 57.9  | 116.6 | 122.3 | 142.1 | 83.4  | 0.64  | 0.41  | 1.40 | 0.81  | 0.2613153  | 1 |
| Q8IZ83 | ALDH16A | 6  | 57.8  | 56.5  | 83.8  | 142.2 | 143.5 | 116.2 | 0.41  | 0.39  | 0.72 | 0.51  | 0.00568227 | 1 |
| Q04828 | AKR1C1  | 2  | 20.4  | 51    | 21.6  | 179.6 | 149   | 178.4 | 0.11  | 0.34  | 0.12 | 0.19  | 0.00061929 | 1 |
| P52895 | AKR1C2  | 7  | 22.4  | 65.3  | 17.8  | 177.6 | 134.7 | 182.2 | 0.13  | 0.48  | 0.10 | 0.24  | 0.00373885 | 1 |
| P42330 | AKR1C3  | 19 | 26.6  | 47    | 24.6  | 173.4 | 153   | 175.4 | 0.15  | 0.31  | 0.14 | 0.20  | 0.00018515 | 1 |
| Q96C23 | GALM    | 11 | 39.1  | 61.3  | 51.5  | 160.9 | 138.7 | 148.5 | 0.24  | 0.44  | 0.35 | 0.34  | 0.00040668 | 1 |
| P15121 | AKR1B1  | 23 | 19.4  | 60.6  | 24.7  | 180.6 | 139.4 | 175.3 | 0.11  | 0.43  | 0.14 | 0.23  | 0.00206283 | 1 |
| O00116 | AGPS    | 21 | 67.7  | 61.9  | 75.2  | 132.3 | 138.1 | 124.8 | 0.51  | 0.45  | 0.60 | 0.52  | 0.00030958 | 1 |
| Q6NUM9 | RETSAT  | 3  | 88.1  | 60.8  | 84.7  | 111.9 | 139.2 | 115.3 | 0.79  | 0.44  | 0.73 | 0.65  | 0.02188537 | 1 |
| Q9H6U8 | ALG9    | 1  | 131.9 | 108.7 | 146.8 | 68.1  | 91.3  | 53.2  | 1.94  | 1.19  | 2.76 | 1.96  | 0.02053277 | 1 |
| P35611 | ADD1    | 14 | 112.6 | 102.6 | 114.1 | 87.4  | 97.4  | 85.9  | 1.29  | 1.05  | 1.33 | 1.22  | 0.01867053 | 1 |
| P49419 | ALDH7A1 | 21 | 124.2 | 89.4  | 94.3  | 75.8  | 110.6 | 105.7 | 1.64  | 0.81  | 0.89 | 1.11  | 0.74926891 | 1 |
| O43768 | ENSA    | 5  | 114.6 | 90.7  | 111.7 | 85.4  | 109.3 | 88.3  | 1.34  | 0.83  | 1.27 | 1.15  | 0.34719172 | 1 |
| P54920 | NAPA    | 20 | 68.4  | 72.7  | 56.7  | 131.6 | 127.3 | 143.3 | 0.52  | 0.57  | 0.40 | 0.50  | 0.00054542 | 1 |
| Q12904 | AIMP1   | 18 | 92    | 130.4 | 89.3  | 108   | 69.6  | 110.7 | 0.85  | 1.87  | 0.81 | 1.18  | 0.69907015 | 1 |
| Q13155 | AIMP2   | 10 | 105   | 136.8 | 105.9 | 95    | 63.2  | 94.1  | 1.11  | 2.16  | 1.13 | 1.47  | 0.09786019 | 1 |
| Q06481 | APLP2   | 6  | 164.9 | 133.6 | 156.5 | 35.1  | 66.4  | 43.5  | 4.70  | 2.01  | 3.60 | 3.44  | 0.00144899 | 1 |
| O75179 | ANKRD17 | 6  | 123.3 | 113.3 | 132.6 | 76.7  | 86.7  | 67.4  | 1.61  | 1.31  | 1.97 | 1.63  | 0.00424914 | 1 |
| Q01484 | ANK2    | 5  | 184.7 | 147.5 | 134.1 | 15.3  | 52.5  | 65.9  | 12.07 | 2.81  | 2.03 | 5.64  | 0.00660926 | 1 |

|        |         |    |       |       |       |       |       |       |       |       |      |       |            |   |
|--------|---------|----|-------|-------|-------|-------|-------|-------|-------|-------|------|-------|------------|---|
| P04083 | ANXA1   | 30 | 79.7  | 92.9  | 82.2  | 120.3 | 107.1 | 117.8 | 0.66  | 0.87  | 0.70 | 0.74  | 0.00623976 | 1 |
| P50995 | ANXA11  | 21 | 92.5  | 81.9  | 85    | 107.5 | 118.1 | 115   | 0.86  | 0.69  | 0.74 | 0.76  | 0.00369292 | 1 |
| P27216 | ANXA13  | 13 | 13.6  | 4     | 33.2  | 186.4 | 196   | 166.8 | 0.07  | 0.02  | 0.20 | 0.10  | 0.00016578 | 1 |
| P07355 | ANXA2   | 41 | 49.3  | 88.7  | 50.4  | 150.7 | 111.3 | 149.6 | 0.33  | 0.80  | 0.34 | 0.49  | 0.01533317 | 1 |
| P12429 | ANXA3   | 24 | 21    | 90.7  | 21.4  | 179   | 109.3 | 178.6 | 0.12  | 0.83  | 0.12 | 0.36  | 0.02737541 | 1 |
| P20073 | ANXA7   | 19 | 76.8  | 80.9  | 85.1  | 123.2 | 119.1 | 114.9 | 0.62  | 0.68  | 0.74 | 0.68  | 0.00035519 | 1 |
| Q4KMQ2 | ANO6    | 8  | 70.5  | 59.9  | 68.4  | 129.5 | 140.1 | 131.6 | 0.54  | 0.43  | 0.52 | 0.50  | 0.0001239  | 1 |
| O95994 | AGR2    | 10 | 8.4   | 4.4   | 73.9  | 191.6 | 195.6 | 126.1 | 0.04  | 0.02  | 0.59 | 0.22  | 0.01113417 | 1 |
| Q03518 | TAP1    | 3  | 131.9 | 89.8  | 138.9 | 68.1  | 110.2 | 61.1  | 1.94  | 0.81  | 2.27 | 1.68  | 0.13592378 | 1 |
| O43747 | AP1G1   | 8  | 96.5  | 126.8 | 99.8  | 103.5 | 73.2  | 100.2 | 0.93  | 1.73  | 1.00 | 1.22  | 0.31991475 | 1 |
| P56377 | AP1S2   | 1  | 162.9 | 171   | 133.7 | 37.1  | 29    | 66.3  | 4.39  | 5.90  | 2.02 | 4.10  | 0.00222177 | 1 |
| O95782 | AP2A1   | 6  | 115.5 | 109.5 | 106.8 | 84.5  | 90.5  | 93.2  | 1.37  | 1.21  | 1.15 | 1.24  | 0.00431091 | 1 |
| O94973 | AP2A2   | 8  | 95.9  | 97.8  | 101.3 | 104.1 | 102.2 | 98.7  | 0.92  | 0.96  | 1.03 | 0.97  | 0.2103777  | 1 |
| P63010 | AP2B1   | 18 | 114.8 | 112.2 | 119.4 | 85.2  | 87.8  | 80.6  | 1.35  | 1.28  | 1.48 | 1.37  | 0.00048437 | 1 |
| Q2M2I8 | AAK1    | 7  | 160.5 | 190.5 | 179.2 | 39.5  | 9.5   | 20.8  | 4.06  | 20.05 | 8.62 | 10.91 | 0.00024274 | 1 |
| Q9BQE5 | APOL2   | 6  | 102.6 | 82.5  | 111.9 | 97.4  | 117.5 | 88.1  | 1.05  | 0.70  | 1.27 | 1.01  | 0.87841744 | 1 |
| O95831 | AIFM1   | 20 | 99.9  | 91.7  | 100.3 | 100.1 | 108.3 | 99.7  | 1.00  | 0.85  | 1.01 | 0.95  | 0.24469633 | 1 |
| Q13625 | TP53BP2 | 7  | 172.4 | 126   | 100.3 | 27.6  | 74    | 99.7  | 6.25  | 1.70  | 1.01 | 2.99  | 0.09210034 | 1 |
| P53367 | ARFIP1  | 8  | 149.1 | 97.6  | 87.1  | 50.9  | 102.4 | 112.9 | 2.93  | 0.95  | 0.77 | 1.55  | 0.45235189 | 1 |
| P52594 | ARFG1   | 6  | 88.6  | 77.9  | 82.3  | 111.4 | 122.1 | 117.7 | 0.80  | 0.64  | 0.70 | 0.71  | 0.00147669 | 1 |
| Q9NVT9 | ARMC1   | 3  | 119.8 | 75.9  | 164   | 80.2  | 124.1 | 36    | 1.49  | 0.61  | 4.56 | 2.22  | 0.3305445  | 1 |
| Q8N2F6 | ARMC10  | 8  | 83.8  | 73.7  | 65.6  | 116.2 | 126.3 | 134.4 | 0.72  | 0.58  | 0.49 | 0.60  | 0.00233111 | 1 |
| P18440 | NAT1    | 4  | 28.1  | 82.9  | 97.7  | 171.9 | 117.1 | 102.3 | 0.16  | 0.71  | 0.96 | 0.61  | 0.11181374 | 1 |
| P08243 | ASNS    | 17 | 163.3 | 139.7 | 156.6 | 36.7  | 60.3  | 43.4  | 4.45  | 2.32  | 3.61 | 3.46  | 0.00042992 | 1 |
| O43776 | NARS    | 26 | 122.6 | 115   | 124.3 | 77.4  | 85    | 75.7  | 1.58  | 1.35  | 1.64 | 1.53  | 0.00051932 | 1 |
| P17174 | GOT1    | 16 | 188   | 134.9 | 122.2 | 12    | 65.1  | 77.8  | 15.67 | 2.07  | 1.57 | 6.44  | 0.02742646 | 1 |
| P00505 | GOT2    | 21 | 84.7  | 84.1  | 89.2  | 115.3 | 115.9 | 110.8 | 0.73  | 0.73  | 0.81 | 0.76  | 0.00025078 | 1 |
| P14868 | DARS    | 30 | 182.9 | 149.9 | 157   | 17.1  | 50.1  | 43    | 10.70 | 2.99  | 3.65 | 5.78  | 0.00087254 | 1 |
| Q6PI48 | DARS2   | 16 | 116.9 | 107.9 | 121.4 | 83.1  | 92.1  | 78.6  | 1.41  | 1.17  | 1.54 | 1.37  | 0.00537112 | 1 |
| Q99700 | ATXN2   | 9  | 147.6 | 118.8 | 155.8 | 52.4  | 81.2  | 44.2  | 2.82  | 1.46  | 3.52 | 2.60  | 0.006817   | 1 |
| Q8WWM7 | ATXN2L  | 20 | 149.6 | 134.4 | 143.3 | 50.4  | 65.6  | 56.7  | 2.97  | 2.05  | 2.53 | 2.51  | 0.00016875 | 1 |
| P24539 | ATP5F1  | 15 | 112.5 | 116.8 | 105   | 87.5  | 83.2  | 95    | 1.29  | 1.40  | 1.11 | 1.26  | 0.0093804  | 1 |
| P00846 | MT-ATP6 | 1  | 113.4 | 104.2 | 113.8 | 86.6  | 95.8  | 86.2  | 1.31  | 1.09  | 1.32 | 1.24  | 0.00916568 | 1 |
| P25705 | ATP5A1  | 35 | 116.6 | 109.9 | 114.7 | 83.4  | 90.1  | 85.3  | 1.40  | 1.22  | 1.34 | 1.32  | 0.00062178 | 1 |
| P06576 | ATP5B   | 28 | 125   | 112.4 | 119.8 | 75    | 87.6  | 80.2  | 1.67  | 1.28  | 1.49 | 1.48  | 0.0018008  | 1 |
| P56385 | ATP5I   | 4  | 97.4  | 80    | 89.3  | 102.6 | 120   | 110.7 | 0.95  | 0.67  | 0.81 | 0.81  | 0.03543282 | 1 |
| P56134 | ATP5J2  | 2  | 114.3 | 103.8 | 113.5 | 85.7  | 96.2  | 86.5  | 1.33  | 1.08  | 1.31 | 1.24  | 0.01156198 | 1 |
| O75964 | ATP5L   | 5  | 109.3 | 102.4 | 101.4 | 90.7  | 97.6  | 98.6  | 1.21  | 1.05  | 1.03 | 1.09  | 0.06773269 | 1 |
| P36542 | ATP5C1  | 9  | 93.1  | 139.2 | 92.9  | 106.9 | 60.8  | 107.1 | 0.87  | 2.29  | 0.87 | 1.34  | 0.48351878 | 1 |
| Q8NBU5 | ATAD1   | 5  | 114.4 | 111.1 | 117.8 | 85.6  | 88.9  | 82.2  | 1.34  | 1.25  | 1.43 | 1.34  | 0.00045611 | 1 |
| Q9NVI7 | ATAD3A  | 8  | 158.8 | 115.6 | 172.4 | 41.2  | 84.4  | 27.6  | 3.85  | 1.37  | 6.25 | 3.82  | 0.01558446 | 1 |

|        |          |    |       |       |       |       |       |       |      |      |      |      |            |   |
|--------|----------|----|-------|-------|-------|-------|-------|-------|------|------|------|------|------------|---|
| Q96S55 | WRNIP1   | 5  | 140.2 | 143.5 | 117.6 | 59.8  | 56.5  | 82.4  | 2.34 | 2.54 | 1.43 | 2.10 | 0.00421429 | 1 |
| P61221 | ABCE1    | 14 | 126.9 | 116.4 | 129.6 | 73.1  | 83.6  | 70.4  | 1.74 | 1.39 | 1.84 | 1.66 | 0.00103395 | 1 |
| Q9UG63 | ABCF2    | 3  | 112.5 | 127.4 | 127.6 | 87.5  | 72.6  | 72.4  | 1.29 | 1.75 | 1.76 | 1.60 | 0.00312636 | 1 |
| P17858 | PFKL     | 3  | 110.1 | 105.4 | 98.4  | 89.9  | 94.6  | 101.6 | 1.22 | 1.11 | 0.97 | 1.10 | 0.1261522  | 1 |
| P08237 | PFKM     | 9  | 119.7 | 106.2 | 112.9 | 80.3  | 93.8  | 87.1  | 1.49 | 1.13 | 1.30 | 1.31 | 0.00935479 | 1 |
| Q01813 | PFKP     | 34 | 92.3  | 85.5  | 91.4  | 107.7 | 114.5 | 108.6 | 0.86 | 0.75 | 0.84 | 0.82 | 0.00243197 | 1 |
| Q16740 | CLPP     | 8  | 137.3 | 80.2  | 97.5  | 62.7  | 119.8 | 102.5 | 2.19 | 0.67 | 0.95 | 1.27 | 0.69721346 | 1 |
| Q92499 | DDX1     | 31 | 98.4  | 98.7  | 105.7 | 101.6 | 101.3 | 94.3  | 0.97 | 0.97 | 1.12 | 1.02 | 0.60943092 | 1 |
| Q9GZR7 | DDX24    | 5  | 147.4 | 109   | 101   | 52.6  | 91    | 99    | 2.80 | 1.20 | 1.02 | 1.67 | 0.13183167 | 1 |
| Q86XP3 | DDX42    | 15 | 109.2 | 78.8  | 98.7  | 90.8  | 121.2 | 101.3 | 1.20 | 0.65 | 0.97 | 0.94 | 0.52064018 | 1 |
| Q7Z478 | DHX29    | 9  | 116   | 96.4  | 103.1 | 84    | 103.6 | 96.9  | 1.38 | 0.93 | 1.06 | 1.13 | 0.27281178 | 1 |
| Q14562 | DHX8     | 2  | 94.2  | 153.3 | 133.5 | 105.8 | 46.7  | 66.5  | 0.89 | 3.28 | 2.01 | 2.06 | 0.09279989 | 1 |
| Q8IYB8 | SUPV3L1  | 6  | 118.3 | 122.3 | 151.1 | 81.7  | 77.7  | 48.9  | 1.45 | 1.57 | 3.09 | 2.04 | 0.01387213 | 1 |
| Q96BJ3 | AIDA     | 7  | 27.3  | 78.8  | 87.7  | 172.7 | 121.2 | 112.3 | 0.16 | 0.65 | 0.78 | 0.53 | 0.05643521 | 1 |
| Q9NR09 | BIRC6    | 8  | 116.5 | 104.5 | 121.6 | 83.5  | 95.5  | 78.4  | 1.40 | 1.09 | 1.55 | 1.35 | 0.01664888 | 1 |
| O95817 | BAG3     | 10 | 136.5 | 127.5 | 125.4 | 63.5  | 72.5  | 74.6  | 2.15 | 1.76 | 1.68 | 1.86 | 0.00024476 | 1 |
| P50895 | BCAM     | 5  | 101.8 | 39.4  | 107.5 | 98.2  | 160.6 | 92.5  | 1.04 | 0.25 | 1.16 | 0.81 | 0.32973049 | 1 |
| P35613 | BSG      | 7  | 99.1  | 101.1 | 111.2 | 100.9 | 98.9  | 88.8  | 0.98 | 1.02 | 1.25 | 1.09 | 0.22459265 | 1 |
| P51572 | BCAP31   | 23 | 107.1 | 89.8  | 106.3 | 92.9  | 110.2 | 93.7  | 1.15 | 0.81 | 1.13 | 1.03 | 0.802271   | 1 |
| Q07817 | BCL2L1   | 2  | 139.3 | 85.6  | 122.4 | 60.7  | 114.4 | 77.6  | 2.29 | 0.75 | 1.58 | 1.54 | 0.23229774 | 1 |
| O15155 | BET1     | 2  | 79.8  | 102   | 109.3 | 120.2 | 98    | 90.7  | 0.66 | 1.04 | 1.21 | 0.97 | 0.66089092 | 1 |
| Q8WYA6 | CTNBL1   | 6  | 146.2 | 127.6 | 142.4 | 53.8  | 72.4  | 57.6  | 2.72 | 1.76 | 2.47 | 2.32 | 0.00064385 | 1 |
| P16278 | GLB1     | 6  | 62.6  | 62.1  | 87.8  | 137.4 | 137.9 | 112.2 | 0.46 | 0.45 | 0.78 | 0.56 | 0.00827018 | 1 |
| P06865 | HEXA     | 7  | 44.1  | 79.7  | 80.3  | 155.9 | 120.3 | 119.7 | 0.28 | 0.66 | 0.67 | 0.54 | 0.01947939 | 1 |
| P07686 | HEXB     | 14 | 131.4 | 121   | 114.4 | 68.6  | 79    | 85.6  | 1.92 | 1.53 | 1.34 | 1.59 | 0.00312565 | 1 |
| P55957 | BID      | 4  | 72.4  | 62.6  | 76.1  | 127.6 | 137.4 | 123.9 | 0.57 | 0.46 | 0.61 | 0.55 | 0.00048178 | 1 |
| Q13057 | COASY    | 9  | 83.3  | 81.9  | 89.6  | 116.7 | 118.1 | 110.4 | 0.71 | 0.69 | 0.81 | 0.74 | 0.00084462 | 1 |
| P07814 | EPRS     | 64 | 116.4 | 111.3 | 121.5 | 83.6  | 88.7  | 78.5  | 1.39 | 1.25 | 1.55 | 1.40 | 0.00140434 | 1 |
| P13995 | MTHFD2   | 10 | 129.9 | 118.9 | 129   | 70.1  | 81.1  | 71    | 1.85 | 1.47 | 1.82 | 1.71 | 0.00048262 | 1 |
| P31939 | ATIC     | 38 | 91.8  | 89.5  | 98.5  | 108.2 | 110.5 | 101.5 | 0.85 | 0.81 | 0.97 | 0.88 | 0.02428868 | 1 |
| Q9Y223 | GNE      | 8  | 120.5 | 93    | 134.4 | 79.5  | 107   | 65.6  | 1.52 | 0.87 | 2.05 | 1.48 | 0.13698777 | 1 |
| P53004 | BLVRA    | 10 | 81.4  | 78.3  | 91.9  | 118.6 | 121.7 | 108.1 | 0.69 | 0.64 | 0.85 | 0.73 | 0.00517568 | 1 |
| P78537 | BLOC1S1  | 2  | 113.7 | 97.5  | 72.4  | 86.3  | 102.5 | 127.6 | 1.32 | 0.95 | 0.57 | 0.95 | 0.55494204 | 1 |
| Q8NFC6 | BOD1L1   | 31 | 121   | 112.1 | 122.9 | 79    | 87.9  | 77.1  | 1.53 | 1.28 | 1.59 | 1.47 | 0.00136868 | 1 |
| P07738 | BPGM     | 5  | 159.5 | 74.6  | 79.8  | 40.5  | 125.4 | 120.2 | 3.94 | 0.59 | 0.66 | 1.73 | 0.8232166  | 1 |
| Q9H3K6 | BOLA2    | 5  | 134.1 | 100.8 | 142.3 | 65.9  | 99.2  | 57.7  | 2.03 | 1.02 | 2.47 | 1.84 | 0.04556324 | 1 |
| Q9UHR4 | BAIAP2L1 | 9  | 106.3 | 143.6 | 131.7 | 93.7  | 56.4  | 68.3  | 1.13 | 2.55 | 1.93 | 1.87 | 0.02496581 | 1 |
| Q6PJK6 | BRAT1    | 9  | 135.6 | 124.6 | 146.3 | 64.4  | 75.4  | 53.7  | 2.11 | 1.65 | 2.72 | 2.16 | 0.00131499 | 1 |
| Q9Y6D6 | ARFGEF1  | 22 | 143.7 | 134.5 | 156.4 | 56.3  | 65.5  | 43.6  | 2.55 | 2.05 | 3.59 | 2.73 | 0.00056329 | 1 |
| Q9Y6D5 | ARFGEF2  | 5  | 115.5 | 129.1 | 119.6 | 84.5  | 70.9  | 80.4  | 1.37 | 1.82 | 1.49 | 1.56 | 0.00167918 | 1 |
| Q5TH69 | ARFGEF3  | 5  | 117.3 | 118   | 155.1 | 82.7  | 82    | 44.9  | 1.42 | 1.44 | 3.45 | 2.10 | 0.02694547 | 1 |

|        |         |    |       |       |       |       |       |       |      |      |       |       |            |   |
|--------|---------|----|-------|-------|-------|-------|-------|-------|------|------|-------|-------|------------|---|
| P25440 | BRD2    | 7  | 152   | 138   | 154   | 48    | 62    | 46    | 3.17 | 2.23 | 3.35  | 2.91  | 0.00017489 | 1 |
| O60885 | BRD4    | 13 | 140.5 | 144.2 | 102.3 | 59.5  | 55.8  | 97.7  | 2.36 | 2.58 | 1.05  | 2.00  | 0.03757446 | 1 |
| P11586 | MTHFD1  | 45 | 118.8 | 111.3 | 117.9 | 81.2  | 88.7  | 82.1  | 1.46 | 1.25 | 1.44  | 1.38  | 0.00066599 | 1 |
| O75844 | ZMPSTE2 | 5  | 125.9 | 101.9 | 108.9 | 74.1  | 98.1  | 91.1  | 1.70 | 1.04 | 1.20  | 1.31  | 0.07214782 | 1 |
| P27708 | CAD     | 62 | 102.3 | 104.2 | 112.6 | 97.7  | 95.8  | 87.4  | 1.05 | 1.09 | 1.29  | 1.14  | 0.04662132 | 1 |
| Q8IWX8 | CHERP   | 11 | 165.1 | 144.5 | 193.5 | 34.9  | 55.5  | 6.5   | 4.73 | 2.60 | 29.77 | 12.37 | 0.00252509 | 1 |
| Q9UM00 | TMCO1   | 5  | 96.4  | 69.7  | 96.8  | 103.6 | 130.3 | 103.2 | 0.93 | 0.53 | 0.94  | 0.80  | 0.12291536 | 1 |
| P49069 | CAMLG   | 4  | 72    | 176.2 | 149.4 | 128   | 23.8  | 50.6  | 0.56 | 7.40 | 2.95  | 3.64  | 0.21480193 | 1 |
| Q8NE86 | MCU     | 9  | 44.7  | 93.8  | 56.1  | 155.3 | 106.2 | 143.9 | 0.29 | 0.88 | 0.39  | 0.52  | 0.02859645 | 1 |
| Q9Y376 | CAB39   | 13 | 110.5 | 115.7 | 113   | 89.5  | 84.3  | 87    | 1.23 | 1.37 | 1.30  | 1.30  | 0.0002504  | 1 |
| P98194 | ATP2C1  | 3  | 67.2  | 92.1  | 66    | 132.8 | 107.9 | 134   | 0.51 | 0.85 | 0.49  | 0.62  | 0.01438379 | 1 |
| Q9HB71 | CACYBP  | 20 | 119.4 | 102.6 | 116.6 | 80.6  | 97.4  | 83.4  | 1.48 | 1.05 | 1.40  | 1.31  | 0.02486068 | 1 |
| Q96JQ2 | CLMN    | 3  | 87.4  | 97.1  | 63.3  | 112.6 | 102.9 | 136.7 | 0.78 | 0.94 | 0.46  | 0.73  | 0.07052391 | 1 |
| P62158 | CALM1   | 5  | 110.4 | 88.1  | 76.6  | 89.6  | 111.9 | 123.4 | 1.23 | 0.79 | 0.62  | 0.88  | 0.3023034  | 1 |
| Q5T5Y3 | CAMSAP1 | 5  | 159.9 | 149.3 | 193.1 | 40.1  | 50.7  | 6.9   | 3.99 | 2.94 | 27.99 | 11.64 | 0.00194314 | 1 |
| P27824 | CANX    | 33 | 106.2 | 103.2 | 106.1 | 93.8  | 96.8  | 93.9  | 1.13 | 1.07 | 1.13  | 1.11  | 0.00175412 | 1 |
| P07384 | CAPN1   | 35 | 78.7  | 72.5  | 82.5  | 121.3 | 127.5 | 117.5 | 0.65 | 0.57 | 0.70  | 0.64  | 0.00042846 | 1 |
| P17655 | CAPN2   | 29 | 105.2 | 101   | 105.5 | 94.8  | 99    | 94.5  | 1.11 | 1.02 | 1.12  | 1.08  | 0.01915337 | 1 |
| Q99439 | CNN2    | 13 | 124.2 | 114.4 | 124.8 | 75.8  | 85.6  | 75.2  | 1.64 | 1.34 | 1.66  | 1.54  | 0.00089402 | 1 |
| Q15417 | CNN3    | 7  | 144.3 | 132.9 | 127.5 | 55.7  | 67.1  | 72.5  | 2.59 | 1.98 | 1.76  | 2.11  | 0.00056916 | 1 |
| O43852 | CALU    | 7  | 179.2 | 108.2 | 108.4 | 20.8  | 91.8  | 91.6  | 8.62 | 1.18 | 1.18  | 3.66  | 0.12861571 | 1 |
| P56211 | ARPP19  | 2  | 92.3  | 84.8  | 107.2 | 107.7 | 115.2 | 92.8  | 0.86 | 0.74 | 1.16  | 0.92  | 0.32379623 | 1 |
| P30622 | CLIP1   | 39 | 115.8 | 114.5 | 122.3 | 84.2  | 85.5  | 77.7  | 1.38 | 1.34 | 1.57  | 1.43  | 0.0005055  | 1 |
| Q9UDT6 | CLIP2   | 5  | 116.1 | 56.3  | 71    | 83.9  | 143.7 | 129   | 1.38 | 0.39 | 0.55  | 0.78  | 0.21220809 | 1 |
| Q14444 | CAPRIN1 | 12 | 141.7 | 130.8 | 151.8 | 58.3  | 69.2  | 48.2  | 2.43 | 1.89 | 3.15  | 2.49  | 0.00064157 | 1 |
| Q8N1G2 | CMTR1   | 5  | 175.6 | 76.3  | 92.2  | 24.4  | 123.7 | 107.8 | 7.20 | 0.62 | 0.86  | 2.89  | 0.53662637 | 1 |
| O43570 | CA12    | 9  | 66.1  | 4     | 3.1   | 133.9 | 196   | 196.9 | 0.49 | 0.02 | 0.02  | 0.18  | 0.00685086 | 1 |
| P00918 | CA2     | 9  | 141.7 | 113.3 | 183.1 | 58.3  | 86.7  | 16.9  | 2.43 | 1.31 | 10.83 | 4.86  | 0.03251536 | 1 |
| P16152 | CBR1    | 17 | 71    | 95.3  | 65.2  | 129   | 104.7 | 134.8 | 0.55 | 0.91 | 0.48  | 0.65  | 0.02484407 | 1 |
| O75828 | CBR3    | 10 | 96.4  | 100.6 | 106.5 | 103.6 | 99.4  | 93.5  | 0.93 | 1.01 | 1.14  | 1.03  | 0.60334897 | 1 |
| Q96DG6 | CMBL    | 3  | 76.4  | 98.9  | 94.3  | 123.6 | 101.1 | 105.7 | 0.62 | 0.98 | 0.89  | 0.83  | 0.10505584 | 1 |
| P43155 | CRAT    | 7  | 108.1 | 95.9  | 99    | 91.9  | 104.1 | 101   | 1.18 | 0.92 | 0.98  | 1.03  | 0.71895283 | 1 |
| P50416 | CPT1A   | 11 | 92    | 78.3  | 88.2  | 108   | 121.7 | 111.8 | 0.85 | 0.64 | 0.79  | 0.76  | 0.0087059  | 1 |
| P48729 | CSNK1A1 | 13 | 109   | 128.2 | 125.1 | 91    | 71.8  | 74.9  | 1.20 | 1.79 | 1.67  | 1.55  | 0.00784447 | 1 |
| P67870 | CSNK2B  | 7  | 110.9 | 128.5 | 110.7 | 89.1  | 71.5  | 89.3  | 1.24 | 1.80 | 1.24  | 1.43  | 0.01609322 | 1 |
| P42574 | CASP3   | 8  | 133.6 | 103   | 114.5 | 66.4  | 97    | 85.5  | 2.01 | 1.06 | 1.34  | 1.47  | 0.05412903 | 1 |
| P55212 | CASP6   | 4  | 126.2 | 99.2  | 107.2 | 73.8  | 100.8 | 92.8  | 1.71 | 0.98 | 1.16  | 1.28  | 0.12737293 | 1 |
| P55210 | CASP7   | 4  | 63.7  | 90.8  | 133.9 | 136.3 | 109.2 | 66.1  | 0.47 | 0.83 | 2.03  | 1.11  | 0.80228704 | 1 |
| P21964 | COMT    | 15 | 110.6 | 87.3  | 115.8 | 89.4  | 112.7 | 84.2  | 1.24 | 0.77 | 1.38  | 1.13  | 0.50201311 | 1 |
| P35221 | CTNNA1  | 29 | 78    | 69.8  | 76.1  | 122   | 130.2 | 123.9 | 0.64 | 0.54 | 0.61  | 0.60  | 0.00013239 | 1 |
| P35222 | CTNNB1  | 13 | 94.7  | 112.8 | 93.9  | 105.3 | 87.2  | 106.1 | 0.90 | 1.29 | 0.89  | 1.03  | 0.91998061 | 1 |

|        |         |    |       |       |       |       |       |       |      |      |      |      |            |   |
|--------|---------|----|-------|-------|-------|-------|-------|-------|------|------|------|------|------------|---|
| O60716 | CTNND1  | 21 | 75.3  | 74.6  | 83.7  | 124.7 | 125.4 | 116.3 | 0.60 | 0.59 | 0.72 | 0.64 | 0.00043129 | 1 |
| P07858 | CTSB    | 11 | 60.8  | 66.6  | 77.4  | 139.2 | 133.4 | 122.6 | 0.44 | 0.50 | 0.63 | 0.52 | 0.00076685 | 1 |
| P07339 | CTSD    | 17 | 88.1  | 65.2  | 91.1  | 111.9 | 134.8 | 108.9 | 0.79 | 0.48 | 0.84 | 0.70 | 0.03276196 | 1 |
| P20645 | M6PR    | 5  | 125.8 | 91.2  | 88.6  | 74.2  | 108.8 | 111.4 | 1.70 | 0.84 | 0.80 | 1.11 | 0.83651994 | 1 |
| P11717 | IGF2R   | 48 | 112.1 | 103.3 | 112.1 | 87.9  | 96.7  | 87.9  | 1.28 | 1.07 | 1.28 | 1.21 | 0.0115161  | 1 |
| Q03135 | CAV1    | 8  | 137.3 | 165.2 | 138.8 | 62.7  | 34.8  | 61.2  | 2.19 | 4.75 | 2.27 | 3.07 | 0.00182319 | 1 |
| A5YKK6 | CNOT1   | 21 | 106.3 | 100.2 | 109.3 | 93.7  | 99.8  | 90.7  | 1.13 | 1.00 | 1.21 | 1.11 | 0.04971627 | 1 |
| Q9UIV1 | CNOT7   | 3  | 105.8 | 134.8 | 58.2  | 94.2  | 65.2  | 141.8 | 1.12 | 2.07 | 0.41 | 1.20 | 0.98100175 | 1 |
| P48509 | CD151   | 6  | 113.8 | 93.5  | 101.7 | 86.2  | 106.5 | 98.3  | 1.32 | 0.88 | 1.03 | 1.08 | 0.51158714 | 1 |
| P60033 | CD81    | 3  | 83.6  | 87.7  | 78.9  | 116.4 | 112.3 | 121.1 | 0.72 | 0.78 | 0.65 | 0.72 | 0.00076447 | 1 |
| Q15642 | TRIP10  | 11 | 139.7 | 125.1 | 145.1 | 60.3  | 74.9  | 54.9  | 2.32 | 1.67 | 2.64 | 2.21 | 0.00097274 | 1 |
| Q9NZ45 | CISD1   | 3  | 139.9 | 84.5  | 102.3 | 60.1  | 115.5 | 97.7  | 2.33 | 0.73 | 1.05 | 1.37 | 0.48383803 | 1 |
| Q8N5K1 | CISD2   | 6  | 111.1 | 99.8  | 107   | 88.9  | 100.2 | 93    | 1.25 | 1.00 | 1.15 | 1.13 | 0.06297555 | 1 |
| Q96JB5 | CDK5RAP | 5  | 91.8  | 140.9 | 131   | 108.2 | 59.1  | 69    | 0.85 | 2.38 | 1.90 | 1.71 | 0.11571677 | 1 |
| Q9NXV6 | CDKN2AI | 3  | 122.9 | 130.3 | 121.2 | 77.1  | 69.7  | 78.8  | 1.59 | 1.87 | 1.54 | 1.67 | 0.00023158 | 1 |
| Q8N163 | CCAR2   | 32 | 117.9 | 113.8 | 123   | 82.1  | 86.2  | 77    | 1.44 | 1.32 | 1.60 | 1.45 | 0.00063476 | 1 |
| Q92600 | RQCD1   | 5  | 102.3 | 68.5  | 100.9 | 97.7  | 131.5 | 99.1  | 1.05 | 0.52 | 1.02 | 0.86 | 0.29347141 | 1 |
| P60953 | CDC42   | 8  | 112.8 | 105.3 | 108.9 | 87.2  | 94.7  | 91.1  | 1.29 | 1.11 | 1.20 | 1.20 | 0.00418767 | 1 |
| P62633 | CNBP    | 7  | 143   | 114.9 | 120.7 | 57    | 85.1  | 79.3  | 2.51 | 1.35 | 1.52 | 1.79 | 0.01238963 | 1 |
| O43264 | ZW10    | 5  | 145.4 | 155.1 | 164.5 | 54.6  | 44.9  | 35.5  | 2.66 | 3.45 | 4.63 | 3.58 | 0.00014658 | 1 |
| Q96G23 | CERS2   | 4  | 121.1 | 105.8 | 120.5 | 78.9  | 94.2  | 79.5  | 1.53 | 1.12 | 1.52 | 1.39 | 0.01110681 | 1 |
| Q9NWW5 | CLN6    | 2  | 89.2  | 103.7 | 105.3 | 110.8 | 96.3  | 94.7  | 0.81 | 1.08 | 1.11 | 1.00 | 0.87643084 | 1 |
| Q9HD42 | CHMP1A  | 3  | 116.2 | 108.3 | 132.3 | 83.8  | 91.7  | 67.7  | 1.39 | 1.18 | 1.95 | 1.51 | 0.01924095 | 1 |
| Q9UQN3 | CHMP2B  | 8  | 88.3  | 31.9  | 61.3  | 111.7 | 168.1 | 138.7 | 0.79 | 0.19 | 0.44 | 0.47 | 0.02653593 | 1 |
| Q9Y3E7 | CHMP3   | 5  | 68.5  | 76.6  | 50.1  | 131.5 | 123.4 | 149.9 | 0.52 | 0.62 | 0.33 | 0.49 | 0.003242   | 1 |
| Q9H444 | CHMP4B  | 5  | 94.6  | 76    | 112.1 | 105.4 | 124   | 87.9  | 0.90 | 0.61 | 1.28 | 0.93 | 0.47767856 | 1 |
| Q9NZZ3 | CHMP5   | 5  | 122.9 | 94.4  | 120.6 | 77.1  | 105.6 | 79.4  | 1.59 | 0.89 | 1.52 | 1.34 | 0.12231597 | 1 |
| Q96FZ7 | CHMP6   | 7  | 93.1  | 66.5  | 54.9  | 106.9 | 133.5 | 145.1 | 0.87 | 0.50 | 0.38 | 0.58 | 0.02349023 | 1 |
| O00299 | CLIC1   | 16 | 131.1 | 112.2 | 130.3 | 68.9  | 87.8  | 69.7  | 1.90 | 1.28 | 1.87 | 1.68 | 0.00492068 | 1 |
| Q9Y696 | CLIC4   | 16 | 139.2 | 100.9 | 142.8 | 60.8  | 99.1  | 57.2  | 2.29 | 1.02 | 2.50 | 1.93 | 0.04346661 | 1 |
| P49585 | PCYT1A  | 5  | 142.2 | 124.3 | 131.8 | 57.8  | 75.7  | 68.2  | 2.46 | 1.64 | 1.93 | 2.01 | 0.00086998 | 1 |
| Q9Y3Y2 | CHTOP   | 3  | 119.7 | 92.8  | 106.6 | 80.3  | 107.2 | 93.4  | 1.49 | 0.87 | 1.14 | 1.17 | 0.31080375 | 1 |
| Q13185 | CBX3    | 8  | 105.3 | 92.2  | 112.7 | 94.7  | 107.8 | 87.3  | 1.11 | 0.86 | 1.29 | 1.09 | 0.46736781 | 1 |
| Q96JM3 | CHAMP1  | 2  | 135.8 | 151.2 | 162.6 | 64.2  | 48.8  | 37.4  | 2.12 | 3.10 | 4.35 | 3.19 | 0.00081497 | 1 |
| O75390 | CS      | 15 | 109.3 | 115.6 | 110.5 | 90.7  | 84.4  | 89.5  | 1.21 | 1.37 | 1.23 | 1.27 | 0.00098665 | 1 |
| Q00610 | CLTC    | 53 | 135.1 | 124.5 | 130.5 | 64.9  | 75.5  | 69.5  | 2.08 | 1.65 | 1.88 | 1.87 | 0.00015798 | 1 |
| Q14677 | CLINT1  | 6  | 69    | 134.8 | 82    | 131   | 65.2  | 118   | 0.53 | 2.07 | 0.69 | 1.10 | 0.75606317 | 1 |
| P09496 | CLTA    | 10 | 95.1  | 75.2  | 89    | 104.9 | 124.8 | 111   | 0.91 | 0.60 | 0.80 | 0.77 | 0.0310956  | 1 |
| O43809 | NUDT21  | 13 | 98.1  | 99.6  | 84.6  | 101.9 | 100.4 | 115.4 | 0.96 | 0.99 | 0.73 | 0.90 | 0.15513424 | 1 |
| Q12996 | CSTF3   | 8  | 150.8 | 26.4  | 128.8 | 49.2  | 173.6 | 71.2  | 3.07 | 0.15 | 1.81 | 1.68 | 0.9447188  | 1 |
| Q96KA5 | CLPTM1L | 2  | 94.6  | 71.3  | 92.5  | 105.4 | 128.7 | 107.5 | 0.90 | 0.55 | 0.86 | 0.77 | 0.05786335 | 1 |



|        |         |    |       |       |       |       |       |       |      |      |      |      |            |   |
|--------|---------|----|-------|-------|-------|-------|-------|-------|------|------|------|------|------------|---|
| Q7Z460 | CLASP1  | 11 | 139   | 130.1 | 160.1 | 61    | 69.9  | 39.9  | 2.28 | 1.86 | 4.01 | 2.72 | 0.00238169 | 1 |
| O75122 | CLASP2  | 6  | 147.3 | 124.6 | 136.7 | 52.7  | 75.4  | 63.3  | 2.80 | 1.65 | 2.16 | 2.20 | 0.00145274 | 1 |
| O75153 | CLUH    | 31 | 109.3 | 92.7  | 106.8 | 90.7  | 107.3 | 93.2  | 1.21 | 0.86 | 1.15 | 1.07 | 0.46707568 | 1 |
| Q14019 | COTL1   | 14 | 130.9 | 125.4 | 137.3 | 69.1  | 74.6  | 62.7  | 1.89 | 1.68 | 2.19 | 1.92 | 0.0002126  | 1 |
| P35606 | COPB2   | 34 | 117.1 | 109.9 | 119.3 | 82.9  | 90.1  | 80.7  | 1.41 | 1.22 | 1.48 | 1.37 | 0.00153897 | 1 |
| P48444 | ARCN1   | 21 | 119.8 | 128   | 124.6 | 80.2  | 72    | 75.4  | 1.49 | 1.78 | 1.65 | 1.64 | 0.00013708 | 1 |
| O14579 | COPE    | 13 | 102.8 | 115   | 105.9 | 97.2  | 85    | 94.1  | 1.06 | 1.35 | 1.13 | 1.18 | 0.03796668 | 1 |
| Q9Y678 | COPG1   | 23 | 130.3 | 120   | 123.1 | 69.7  | 80    | 76.9  | 1.87 | 1.50 | 1.60 | 1.66 | 0.00034459 | 1 |
| Q9UBF2 | COPG2   | 5  | 143.1 | 113.5 | 133.2 | 56.9  | 86.5  | 66.8  | 2.51 | 1.31 | 1.99 | 1.94 | 0.00824319 | 1 |
| P61923 | COPZ1   | 6  | 124.1 | 108.3 | 121.4 | 75.9  | 91.7  | 78.6  | 1.64 | 1.18 | 1.54 | 1.45 | 0.00652615 | 1 |
| P23528 | CFL1    | 14 | 109   | 106.6 | 113.4 | 91    | 93.4  | 86.6  | 1.20 | 1.14 | 1.31 | 1.22 | 0.00235667 | 1 |
| Q9Y281 | CFL2    | 5  | 94.1  | 90.6  | 100.9 | 105.9 | 109.4 | 99.1  | 0.89 | 0.83 | 1.02 | 0.91 | 0.0881383  | 1 |
| Q8N3U4 | STAG2   | 6  | 142.4 | 141.5 | 158.7 | 57.6  | 58.5  | 41.3  | 2.47 | 2.42 | 3.84 | 2.91 | 0.00027403 | 1 |
| Q96CT7 | CCDC124 | 4  | 111.8 | 105.1 | 166.9 | 88.2  | 94.9  | 33.1  | 1.27 | 1.11 | 5.04 | 2.47 | 0.11380253 | 1 |
| Q4VC31 | CCDC58  | 4  | 129   | 129.6 | 110.7 | 71    | 70.4  | 89.3  | 1.82 | 1.84 | 1.24 | 1.63 | 0.00622468 | 1 |
| Q16204 | CCDC6   | 8  | 120.4 | 63.5  | 115.6 | 79.6  | 136.5 | 84.4  | 1.51 | 0.47 | 1.37 | 1.12 | 0.99029769 | 1 |
| O75534 | CSDE1   | 23 | 133.9 | 125.6 | 139.9 | 66.1  | 74.4  | 60.1  | 2.03 | 1.69 | 2.33 | 2.01 | 0.00034925 | 1 |
| Q02388 | COL7A1  | 8  | 5.6   | 4.6   | 50.4  | 194.4 | 195.4 | 149.6 | 0.03 | 0.02 | 0.34 | 0.13 | 0.00171456 | 1 |
| Q9Y5P4 | COL4A3B | 6  | 123.9 | 121.9 | 135.5 | 76.1  | 78.1  | 64.5  | 1.63 | 1.56 | 2.10 | 1.76 | 0.00082956 | 1 |
| Q07021 | C1QBP   | 6  | 73.9  | 85.6  | 78.1  | 126.1 | 114.4 | 121.9 | 0.59 | 0.75 | 0.64 | 0.66 | 0.00100635 | 1 |
| Q9NPL8 | TIMMDC1 | 5  | 65.2  | 76.6  | 65.3  | 134.8 | 123.4 | 134.7 | 0.48 | 0.62 | 0.48 | 0.53 | 0.00031824 | 1 |
| Q9BPX3 | NCAPG   | 5  | 156.7 | 111.8 | 174.9 | 43.3  | 88.2  | 25.1  | 3.62 | 1.27 | 6.97 | 3.95 | 0.02265524 | 1 |
| Q9NZB2 | FAM120A | 24 | 107.5 | 105   | 105.4 | 92.5  | 95    | 94.6  | 1.16 | 1.11 | 1.11 | 1.13 | 0.00040459 | 1 |
| Q13098 | GPS1    | 7  | 145.1 | 118.6 | 122.6 | 54.9  | 81.4  | 77.4  | 2.64 | 1.46 | 1.58 | 1.89 | 0.00785915 | 1 |
| Q92905 | COPS5   | 18 | 110.5 | 105.9 | 123.5 | 89.5  | 94.1  | 76.5  | 1.23 | 1.13 | 1.61 | 1.32 | 0.02339563 | 1 |
| Q7L5N1 | COPS6   | 14 | 119.5 | 105.5 | 118.5 | 80.5  | 94.5  | 81.5  | 1.48 | 1.12 | 1.45 | 1.35 | 0.01043692 | 1 |
| Q99627 | COPS8   | 3  | 127.4 | 110.8 | 145.7 | 72.6  | 89.2  | 54.3  | 1.75 | 1.24 | 2.68 | 1.89 | 0.01718699 | 1 |
| Q99829 | CPNE1   | 11 | 130.2 | 121.9 | 134.3 | 69.8  | 78.1  | 65.7  | 1.87 | 1.56 | 2.04 | 1.82 | 0.00036608 | 1 |
| O75131 | CPNE3   | 24 | 181.1 | 150.2 | 164.1 | 18.9  | 49.8  | 35.9  | 9.58 | 3.02 | 4.57 | 5.72 | 0.00049945 | 1 |
| Q9NTM9 | CUTC    | 6  | 116.3 | 97.9  | 77.7  | 83.7  | 102.1 | 122.3 | 1.39 | 0.96 | 0.64 | 0.99 | 0.74917999 | 1 |
| Q9BR76 | CORO1B  | 13 | 124.6 | 113.7 | 130.2 | 75.4  | 86.3  | 69.8  | 1.65 | 1.32 | 1.87 | 1.61 | 0.00263179 | 1 |
| Q9ULV4 | CORO1C  | 14 | 125.6 | 118   | 120.7 | 74.4  | 82    | 79.3  | 1.69 | 1.44 | 1.52 | 1.55 | 0.00016793 | 1 |
| P57737 | CORO7   | 6  | 129   | 117   | 130   | 71    | 83    | 70    | 1.82 | 1.41 | 1.86 | 1.69 | 0.00101456 | 1 |
| Q9P1F3 | ABRACL  | 1  | 133.3 | 123   | 159.8 | 66.7  | 77    | 40.2  | 2.00 | 1.60 | 3.98 | 2.52 | 0.00752675 | 1 |
| Q92793 | CREBBP  | 4  | 107   | 112.7 | 96.1  | 93    | 87.3  | 103.9 | 1.15 | 1.29 | 0.92 | 1.12 | 0.20088141 | 1 |
| P46109 | CRKL    | 9  | 148.6 | 89.7  | 138.5 | 51.4  | 110.3 | 61.5  | 2.89 | 0.81 | 2.25 | 1.99 | 0.11733838 | 1 |
| P17812 | CTPS1   | 14 | 121.2 | 114.3 | 122.6 | 78.8  | 85.7  | 77.4  | 1.54 | 1.33 | 1.58 | 1.49 | 0.000436   | 1 |
| Q13616 | CUL1    | 6  | 141.9 | 117.5 | 114.1 | 58.1  | 82.5  | 85.9  | 2.44 | 1.42 | 1.33 | 1.73 | 0.01671329 | 1 |
| Q13617 | CUL2    | 7  | 136.5 | 139.2 | 128.1 | 63.5  | 60.8  | 71.9  | 2.15 | 2.29 | 1.78 | 2.07 | 0.00012662 | 1 |
| Q13618 | CUL3    | 19 | 117.6 | 129.1 | 121.5 | 82.4  | 70.9  | 78.5  | 1.43 | 1.82 | 1.55 | 1.60 | 0.00067929 | 1 |
| Q13620 | CUL4B   | 11 | 122   | 125.9 | 131.9 | 78    | 74.1  | 68.1  | 1.56 | 1.70 | 1.94 | 1.73 | 0.00019811 | 1 |

|        |         |    |       |       |       |       |       |       |      |      |      |      |            |   |
|--------|---------|----|-------|-------|-------|-------|-------|-------|------|------|------|------|------------|---|
| P06493 | CDK1    | 19 | 130.2 | 151.9 | 134.3 | 69.8  | 48.1  | 65.7  | 1.87 | 3.16 | 2.04 | 2.36 | 0.00118084 | 1 |
| P21127 | CDK11B  | 4  | 140.9 | 159.8 | 149.3 | 59.1  | 40.2  | 50.7  | 2.38 | 3.98 | 2.94 | 3.10 | 0.00020613 | 1 |
| P11802 | CDK4    | 5  | 147.3 | 128.6 | 108.7 | 52.7  | 71.4  | 91.3  | 2.80 | 1.80 | 1.19 | 1.93 | 0.02319936 | 1 |
| Q00535 | CDK5    | 10 | 93.6  | 133.2 | 81.9  | 106.4 | 66.8  | 118.1 | 0.88 | 1.99 | 0.69 | 1.19 | 0.80466449 | 1 |
| P51946 | CCNH    | 5  | 126.9 | 122.8 | 150.1 | 73.1  | 77.2  | 49.9  | 1.74 | 1.59 | 3.01 | 2.11 | 0.00520685 | 1 |
| O75909 | CCNK    | 4  | 140.5 | 128.4 | 132.7 | 59.5  | 71.6  | 67.3  | 2.36 | 1.79 | 1.97 | 2.04 | 0.00017299 | 1 |
| P04080 | CSTB    | 6  | 106.1 | 101.8 | 96    | 93.9  | 98.2  | 104   | 1.13 | 1.04 | 0.92 | 1.03 | 0.56392342 | 1 |
| P21291 | CSRP1   | 11 | 67.6  | 33.4  | 73.3  | 132.4 | 166.6 | 126.7 | 0.51 | 0.20 | 0.58 | 0.43 | 0.00893146 | 1 |
| Q9UHD1 | CHORDC1 | 16 | 128.5 | 116.7 | 125.3 | 71.5  | 83.3  | 74.7  | 1.80 | 1.40 | 1.68 | 1.63 | 0.00070427 | 1 |
| P49589 | CARS    | 18 | 103   | 97.8  | 104.4 | 97    | 102.2 | 95.6  | 1.06 | 0.96 | 1.09 | 1.04 | 0.28916325 | 1 |
| P00156 | MT-CYB  | 2  | 128.7 | 116.3 | 125.9 | 71.3  | 83.7  | 74.1  | 1.81 | 1.39 | 1.70 | 1.63 | 0.00088026 | 1 |
| P22695 | UQCRC2  | 13 | 143.7 | 96.2  | 100   | 56.3  | 103.8 | 100   | 2.55 | 0.93 | 1.00 | 1.49 | 0.28467324 | 1 |
| O14949 | UQCRQ   | 4  | 92.6  | 35    | 104   | 107.4 | 165   | 96    | 0.86 | 0.21 | 1.08 | 0.72 | 0.20558122 | 1 |
| P47985 | UQCRFS1 | 4  | 115.5 | 107.3 | 103.8 | 84.5  | 92.7  | 96.2  | 1.37 | 1.16 | 1.08 | 1.20 | 0.02242433 | 1 |
| P99999 | CYCS    | 10 | 154.9 | 135.2 | 150.7 | 45.1  | 64.8  | 49.3  | 3.43 | 2.09 | 3.06 | 2.86 | 0.00037743 | 1 |
| Q9Y2R0 | COA3    | 3  | 78.4  | 75.8  | 119.5 | 121.6 | 124.2 | 80.5  | 0.64 | 0.61 | 1.48 | 0.91 | 0.43049531 | 1 |
| Q5RI15 | COX20   | 1  | 117.4 | 114.6 | 149.2 | 82.6  | 85.4  | 50.8  | 1.42 | 1.34 | 2.94 | 1.90 | 0.02606231 | 1 |
| P00403 | MT-CO2  | 5  | 119.6 | 113.3 | 118.2 | 80.4  | 86.7  | 81.8  | 1.49 | 1.31 | 1.44 | 1.41 | 0.00022749 | 1 |
| P14406 | COX7A2  | 1  | 108   | 58.2  | 106.3 | 92    | 141.8 | 93.7  | 1.17 | 0.41 | 1.13 | 0.91 | 0.47156588 | 1 |
| P15954 | COX7C   | 1  | 115.6 | 104.5 | 109.2 | 84.4  | 95.5  | 90.8  | 1.37 | 1.09 | 1.20 | 1.22 | 0.01270824 | 1 |
| O00483 | NDUFA4  | 3  | 90.9  | 86.2  | 63    | 109.1 | 113.8 | 137   | 0.83 | 0.76 | 0.46 | 0.68 | 0.03066688 | 1 |
| P53701 | HCCS    | 11 | 137.7 | 113.6 | 141.8 | 62.3  | 86.4  | 58.2  | 2.21 | 1.31 | 2.44 | 1.99 | 0.00754824 | 1 |
| P21399 | ACO1    | 22 | 87.7  | 80.2  | 91.7  | 112.3 | 119.8 | 108.3 | 0.78 | 0.67 | 0.85 | 0.77 | 0.00483323 | 1 |
| Q7L576 | CYFIP1  | 10 | 134.4 | 128.3 | 141.8 | 65.6  | 71.7  | 58.2  | 2.05 | 1.79 | 2.44 | 2.09 | 0.00022688 | 1 |
| Q07065 | CKAP4   | 19 | 79.2  | 69.9  | 80.1  | 120.8 | 130.1 | 119.9 | 0.66 | 0.54 | 0.67 | 0.62 | 0.0005133  | 1 |
| Q9H0P0 | NT5C3A  | 7  | 83.4  | 91    | 79    | 116.6 | 109   | 121   | 0.72 | 0.83 | 0.65 | 0.73 | 0.00330684 | 1 |
| O00154 | ACOT7   | 13 | 164.4 | 140.8 | 163.1 | 35.6  | 59.2  | 36.9  | 4.62 | 2.38 | 4.42 | 3.81 | 0.0004903  | 1 |
| P53384 | NUBP1   | 4  | 87.6  | 91.9  | 101.7 | 112.4 | 108.1 | 98.3  | 0.78 | 0.85 | 1.03 | 0.89 | 0.10087259 | 1 |
| Q9Y5Y2 | NUBP2   | 5  | 69.8  | 88.1  | 85.4  | 130.2 | 111.9 | 114.6 | 0.54 | 0.79 | 0.75 | 0.69 | 0.00940321 | 1 |
| P47712 | PLA2G4A | 17 | 5.2   | 5.6   | 117.8 | 194.8 | 194.4 | 82.2  | 0.03 | 0.03 | 1.43 | 0.50 | 0.09726561 | 1 |
| Q96GG9 | DCUN1D1 | 9  | 99.8  | 89.9  | 90.7  | 100.2 | 110.1 | 109.3 | 1.00 | 0.82 | 0.83 | 0.88 | 0.04367739 | 1 |
| Q9BTE7 | DCUN1D5 | 4  | 150.5 | 53.9  | 143.3 | 49.5  | 146.1 | 56.7  | 3.04 | 0.37 | 2.53 | 1.98 | 0.50929195 | 1 |
| Q9H773 | DCTPP1  | 4  | 79.8  | 93.1  | 102.2 | 120.2 | 106.9 | 97.8  | 0.66 | 0.87 | 1.04 | 0.86 | 0.1454404  | 1 |
| P30046 | DDT     | 5  | 132   | 130.2 | 145.9 | 68    | 69.8  | 54.1  | 1.94 | 1.87 | 2.70 | 2.17 | 0.00050637 | 1 |
| Q96HY6 | DDRKG1  | 6  | 138.1 | 127   | 129.8 | 61.9  | 73    | 70.2  | 2.23 | 1.74 | 1.85 | 1.94 | 0.00017818 | 1 |
| Q9BTC0 | DIDO1   | 9  | 119.1 | 100.2 | 101.5 | 80.9  | 99.8  | 98.5  | 1.47 | 1.00 | 1.03 | 1.17 | 0.18295232 | 1 |
| Q96BY6 | DOCK10  | 2  | 74.6  | 115.3 | 82.1  | 125.4 | 84.7  | 117.9 | 0.59 | 1.36 | 0.70 | 0.88 | 0.35073723 | 1 |
| Q9BTZ2 | DHRS4   | 4  | 20.7  | 63    | 21.2  | 179.3 | 137   | 178.8 | 0.12 | 0.46 | 0.12 | 0.23 | 0.00279118 | 1 |
| Q6IAN0 | DHRS7B  | 5  | 96.9  | 123.4 | 117.7 | 103.1 | 76.6  | 82.3  | 0.94 | 1.61 | 1.43 | 1.33 | 0.09017291 | 1 |
| P30038 | ALDH4A1 | 11 | 112.7 | 109.4 | 83.5  | 87.3  | 90.6  | 116.5 | 1.29 | 1.21 | 0.72 | 1.07 | 0.78912954 | 1 |
| P54886 | ALDH18A | 20 | 112.5 | 104.4 | 107.4 | 87.5  | 95.6  | 92.6  | 1.29 | 1.09 | 1.16 | 1.18 | 0.00836966 | 1 |

|        |         |    |       |       |       |       |       |       |      |      |      |      |            |   |
|--------|---------|----|-------|-------|-------|-------|-------|-------|------|------|------|------|------------|---|
| P13716 | ALAD    | 8  | 114.3 | 90.5  | 134.1 | 85.7  | 109.5 | 65.9  | 1.33 | 0.83 | 2.03 | 1.40 | 0.21938311 | 1 |
| O43583 | DENR    | 7  | 125.1 | 92.8  | 121.4 | 74.9  | 107.2 | 78.6  | 1.67 | 0.87 | 1.54 | 1.36 | 0.14367314 | 1 |
| P27707 | DCK     | 3  | 98.2  | 175.7 | 116.4 | 101.8 | 24.3  | 83.6  | 0.96 | 7.23 | 1.39 | 3.20 | 0.14298805 | 1 |
| P32321 | DCTD    | 5  | 121.1 | 110.3 | 130.4 | 78.9  | 89.7  | 69.6  | 1.53 | 1.23 | 1.87 | 1.55 | 0.00740523 | 1 |
| Q16854 | DGUOK   | 3  | 64.5  | 105.3 | 109.8 | 135.5 | 94.7  | 90.2  | 0.48 | 1.11 | 1.22 | 0.94 | 0.5410352  | 1 |
| Q9BU89 | DOHH    | 2  | 157.4 | 115.9 | 130.6 | 42.6  | 84.1  | 69.4  | 3.69 | 1.38 | 1.88 | 2.32 | 0.01571195 | 1 |
| Q9Y3Z3 | SAMHD1  | 8  | 83.1  | 155.8 | 155.3 | 116.9 | 44.2  | 44.7  | 0.71 | 3.52 | 3.47 | 2.57 | 0.13980298 | 1 |
| Q9Y315 | DERA    | 9  | 63.4  | 92.9  | 46.4  | 136.6 | 107.1 | 153.6 | 0.46 | 0.87 | 0.30 | 0.54 | 0.02787373 | 1 |
| Q14126 | DSG2    | 9  | 57.1  | 73.7  | 54.8  | 142.9 | 126.3 | 145.2 | 0.40 | 0.58 | 0.38 | 0.45 | 0.0008233  | 1 |
| P15924 | DSP     | 4  | 85.1  | 62.4  | 76.5  | 114.9 | 137.6 | 123.5 | 0.74 | 0.45 | 0.62 | 0.60 | 0.00563731 | 1 |
| P60981 | DSTN    | 8  | 64.1  | 61.5  | 44.7  | 135.9 | 138.5 | 155.3 | 0.47 | 0.44 | 0.29 | 0.40 | 0.0005499  | 1 |
| Q9NR28 | DIABLO  | 9  | 113.7 | 104.5 | 108   | 86.3  | 95.5  | 92    | 1.32 | 1.09 | 1.17 | 1.20 | 0.00997979 | 1 |
| P09622 | DLD     | 20 | 142.5 | 86.3  | 85.9  | 57.5  | 113.7 | 114.1 | 2.48 | 0.76 | 0.75 | 1.33 | 0.73111178 | 1 |
| P09417 | QDPR    | 11 | 62.6  | 77.1  | 55.6  | 137.4 | 122.9 | 144.4 | 0.46 | 0.63 | 0.39 | 0.49 | 0.00146055 | 1 |
| Q9NY33 | DPP3    | 19 | 102.2 | 96.1  | 101.6 | 97.8  | 103.9 | 98.4  | 1.04 | 0.92 | 1.03 | 1.00 | 0.98178794 | 1 |
| Q9NZJ9 | NUDT4   | 2  | 109   | 88.6  | 92.7  | 91    | 111.4 | 107.3 | 1.20 | 0.80 | 0.86 | 0.95 | 0.50367759 | 1 |
| Q9P265 | DIP2B   | 9  | 133.7 | 144   | 122.2 | 66.3  | 56    | 77.8  | 2.02 | 2.57 | 1.57 | 2.05 | 0.00170842 | 1 |
| O14672 | ADAM10  | 8  | 71.1  | 10    | 51.9  | 128.9 | 190   | 148.1 | 0.55 | 0.05 | 0.35 | 0.32 | 0.01202374 | 1 |
| Q13443 | ADAM9   | 5  | 53.5  | 112.4 | 94.9  | 146.5 | 87.6  | 105.1 | 0.37 | 1.28 | 0.90 | 0.85 | 0.3496501  | 1 |
| Q12959 | DLG1    | 5  | 21.1  | 98.9  | 103.5 | 178.9 | 101.1 | 96.5  | 0.12 | 0.98 | 1.07 | 0.72 | 0.24864863 | 1 |
| Q2NKX8 | ERCC6L  | 12 | 178.7 | 158.3 | 157   | 21.3  | 41.7  | 43    | 8.39 | 3.80 | 3.65 | 5.28 | 0.00020113 | 1 |
| P18858 | LIG1    | 9  | 122.1 | 113.1 | 90.2  | 77.9  | 86.9  | 109.8 | 1.57 | 1.30 | 0.82 | 1.23 | 0.27585682 | 1 |
| P52701 | MSH6    | 21 | 117.1 | 116.1 | 128   | 82.9  | 83.9  | 72    | 1.41 | 1.38 | 1.78 | 1.52 | 0.0016323  | 1 |
| P09884 | POLA1   | 9  | 161.3 | 148.7 | 169.5 | 38.7  | 51.3  | 30.5  | 4.17 | 2.90 | 5.56 | 4.21 | 0.0001515  | 1 |
| P28340 | POLD1   | 5  | 108.6 | 96.7  | 109.9 | 91.4  | 103.3 | 90.1  | 1.19 | 0.94 | 1.22 | 1.11 | 0.16320709 | 1 |
| Q92878 | RAD50   | 22 | 145.9 | 128.5 | 131.2 | 54.1  | 71.5  | 68.8  | 2.70 | 1.80 | 1.91 | 2.13 | 0.00077299 | 1 |
| P25205 | MCM3    | 26 | 145.9 | 131.5 | 138.3 | 54.1  | 68.5  | 61.7  | 2.70 | 1.92 | 2.24 | 2.29 | 0.00019524 | 1 |
| P27695 | APEX1   | 23 | 73.1  | 78.2  | 67.1  | 126.9 | 121.8 | 132.9 | 0.58 | 0.64 | 0.50 | 0.57 | 0.00027719 | 1 |
| P19387 | POLR2C  | 6  | 118.8 | 114.2 | 108.8 | 81.2  | 85.8  | 91.2  | 1.46 | 1.33 | 1.19 | 1.33 | 0.00241835 | 1 |
| O00411 | POLRMT  | 1  | 103.3 | 90.3  | 77.8  | 96.7  | 109.7 | 122.2 | 1.07 | 0.82 | 0.64 | 0.84 | 0.14099883 | 1 |
| P19388 | POLR2E  | 9  | 126.2 | 110.1 | 142.2 | 73.8  | 89.9  | 57.8  | 1.71 | 1.22 | 2.46 | 1.80 | 0.01621825 | 1 |
| P52434 | POLR2H  | 5  | 152.1 | 151.1 | 118.2 | 47.9  | 48.9  | 81.8  | 3.18 | 3.09 | 1.44 | 2.57 | 0.00679807 | 1 |
| P25685 | DNAJB1  | 11 | 123.9 | 81.8  | 125.9 | 76.1  | 118.2 | 74.1  | 1.63 | 0.69 | 1.70 | 1.34 | 0.35870762 | 1 |
| Q8IXB1 | DNAJC10 | 10 | 134.1 | 142.7 | 129.3 | 65.9  | 57.3  | 70.7  | 2.03 | 2.49 | 1.83 | 2.12 | 0.00021736 | 1 |
| O75165 | DNAJC13 | 7  | 103.4 | 144.6 | 125.4 | 96.6  | 55.4  | 74.6  | 1.07 | 2.61 | 1.68 | 1.79 | 0.04380835 | 1 |
| Q99543 | DNAJC2  | 8  | 132.4 | 109.7 | 122.7 | 67.6  | 90.3  | 77.3  | 1.96 | 1.21 | 1.59 | 1.59 | 0.00969583 | 1 |
| O75937 | DNAJC8  | 10 | 147.4 | 100.9 | 146.7 | 52.6  | 99.1  | 53.3  | 2.80 | 1.02 | 2.75 | 2.19 | 0.0436382  | 1 |
| Q8WXX5 | DNAJC9  | 9  | 111.1 | 178.4 | 109.5 | 88.9  | 21.6  | 90.5  | 1.25 | 8.26 | 1.21 | 3.57 | 0.10901013 | 1 |
| Q5SXM8 | DNLZ    | 2  | 117.2 | 105.1 | 117.8 | 82.8  | 94.9  | 82.2  | 1.42 | 1.11 | 1.43 | 1.32 | 0.01026566 | 1 |
| P04843 | RPN1    | 30 | 127.8 | 120.4 | 129   | 72.2  | 79.6  | 71    | 1.77 | 1.51 | 1.82 | 1.70 | 0.00017253 | 1 |
| P61803 | DAD1    | 3  | 109.4 | 104   | 109.4 | 90.6  | 96    | 90.6  | 1.21 | 1.08 | 1.21 | 1.17 | 0.00395177 | 1 |

|        |          |    |       |       |       |       |       |       |       |      |      |      |            |   |
|--------|----------|----|-------|-------|-------|-------|-------|-------|-------|------|------|------|------------|---|
| P46977 | STT3A    | 12 | 129.1 | 120.8 | 135.5 | 70.9  | 79.2  | 64.5  | 1.82  | 1.53 | 2.10 | 1.82 | 0.00069631 | 1 |
| Q8TCJ2 | STT3B    | 9  | 87.3  | 96.5  | 102.5 | 112.7 | 103.5 | 97.5  | 0.77  | 0.93 | 1.05 | 0.92 | 0.21778892 | 1 |
| Q9Y673 | ALG5     | 11 | 68.5  | 96.9  | 82.2  | 131.5 | 103.1 | 117.8 | 0.52  | 0.94 | 0.70 | 0.72 | 0.03945841 | 1 |
| P49959 | MRE11    | 13 | 179.1 | 131.2 | 135.8 | 20.9  | 68.8  | 64.2  | 8.57  | 1.91 | 2.12 | 4.20 | 0.01070831 | 1 |
| P55265 | ADAR     | 9  | 123.6 | 136.1 | 134.1 | 76.4  | 63.9  | 65.9  | 1.62  | 2.13 | 2.03 | 1.93 | 0.00033699 | 1 |
| O14972 | DSCR3    | 4  | 129.3 | 89.2  | 88.2  | 70.7  | 110.8 | 111.8 | 1.83  | 0.81 | 0.79 | 1.14 | 0.82696159 | 1 |
| Q9UJU6 | DBNL     | 17 | 45.8  | 124   | 98.7  | 154.2 | 76    | 101.3 | 0.30  | 1.63 | 0.97 | 0.97 | 0.55432389 | 1 |
| Q8TEA8 | DTD1     | 7  | 113.4 | 95.3  | 103.3 | 86.6  | 104.7 | 96.7  | 1.31  | 0.91 | 1.07 | 1.10 | 0.34082335 | 1 |
| P51452 | DUSP3    | 6  | 57.1  | 34    | 57.8  | 142.9 | 166   | 142.2 | 0.40  | 0.20 | 0.41 | 0.34 | 0.00080552 | 1 |
| Q9UJW0 | DCTN4    | 6  | 132   | 147.5 | 113.6 | 68    | 52.5  | 86.4  | 1.94  | 2.81 | 1.31 | 2.02 | 0.01099619 | 1 |
| Q9BTE1 | DCTN5    | 3  | 132.1 | 145.9 | 113.1 | 67.9  | 54.1  | 86.9  | 1.95  | 2.70 | 1.30 | 1.98 | 0.01068555 | 1 |
| O00399 | DCTN6    | 2  | 120.1 | 93.1  | 128.2 | 79.9  | 106.9 | 71.8  | 1.50  | 0.87 | 1.79 | 1.39 | 0.13971758 | 1 |
| Q6XZF7 | DNMBP    | 20 | 181.9 | 133.8 | 180.7 | 18.1  | 66.2  | 19.3  | 10.05 | 2.02 | 9.36 | 7.14 | 0.00426986 | 1 |
| O60313 | OPA1     | 10 | 156   | 146.4 | 139.6 | 44    | 53.6  | 60.4  | 3.55  | 2.73 | 2.31 | 2.86 | 0.00014803 | 1 |
| P63167 | DYNLL1   | 3  | 126.2 | 117.9 | 138.6 | 73.8  | 82.1  | 61.4  | 1.71  | 1.44 | 2.26 | 1.80 | 0.00292016 | 1 |
| Q96FJ2 | DYNLL2   | 2  | 89.8  | 94.9  | 105.2 | 110.2 | 105.1 | 94.8  | 0.81  | 0.90 | 1.11 | 0.94 | 0.35247832 | 1 |
| Q9NP97 | DYNLRB1  | 2  | 120   | 109.8 | 116.8 | 80    | 90.2  | 83.2  | 1.50  | 1.22 | 1.40 | 1.37 | 0.00187845 | 1 |
| P51808 | DYNLT3   | 1  | 97.4  | 83.9  | 81    | 102.6 | 116.1 | 119   | 0.95  | 0.72 | 0.68 | 0.78 | 0.02451645 | 1 |
| Q8IZA0 | KIAA0319 | 3  | 84.4  | 88.9  | 106.2 | 115.6 | 111.1 | 93.8  | 0.73  | 0.80 | 1.13 | 0.89 | 0.21953841 | 1 |
| Q14258 | TRIM25   | 18 | 130.3 | 123   | 140.3 | 69.7  | 77    | 59.7  | 1.87  | 1.60 | 2.35 | 1.94 | 0.00092007 | 1 |
| Q9UKV5 | AMFR     | 2  | 53.4  | 92.4  | 65.7  | 146.6 | 107.6 | 134.3 | 0.36  | 0.86 | 0.49 | 0.57 | 0.02227399 | 1 |
| Q9Y4X5 | ARIH1    | 3  | 113.3 | 122   | 66.9  | 86.7  | 78    | 133.1 | 1.31  | 1.56 | 0.50 | 1.12 | 0.95455394 | 1 |
| Q5VTR2 | RNF20    | 11 | 120.6 | 114.3 | 116.5 | 79.4  | 85.7  | 83.5  | 1.52  | 1.33 | 1.40 | 1.42 | 0.00019456 | 1 |
| Q9UNE7 | STUB1    | 11 | 109.6 | 101.7 | 100.7 | 90.4  | 98.3  | 99.3  | 1.21  | 1.03 | 1.01 | 1.09 | 0.11484443 | 1 |
| Q9ULT8 | HECTD1   | 10 | 109.1 | 89.7  | 104.1 | 90.9  | 110.3 | 95.9  | 1.20  | 0.81 | 1.09 | 1.03 | 0.82568947 | 1 |
| Q7Z6Z7 | HUWE1    | 47 | 126.1 | 115   | 117.9 | 73.9  | 85    | 82.1  | 1.71  | 1.35 | 1.44 | 1.50 | 0.00111547 | 1 |
| P46934 | NEDD4    | 6  | 123.1 | 97    | 101.3 | 76.9  | 103   | 98.7  | 1.60  | 0.94 | 1.03 | 1.19 | 0.27988851 | 1 |
| Q63HN8 | RNF213   | 30 | 95.8  | 85.1  | 93.1  | 104.2 | 114.9 | 106.9 | 0.92  | 0.74 | 0.87 | 0.84 | 0.01885768 | 1 |
| Q9UPN9 | TRIM33   | 4  | 129.1 | 123.6 | 138.5 | 70.9  | 76.4  | 61.5  | 1.82  | 1.62 | 2.25 | 1.90 | 0.00058819 | 1 |
| Q14669 | TRIP12   | 7  | 115.1 | 115.8 | 130.3 | 84.9  | 84.2  | 69.7  | 1.36  | 1.38 | 1.87 | 1.53 | 0.00433056 | 1 |
| Q5T4S7 | UBR4     | 22 | 155.5 | 112.1 | 150   | 44.5  | 87.9  | 50    | 3.49  | 1.28 | 3.00 | 2.59 | 0.01530451 | 1 |
| O95071 | UBR5     | 19 | 153.5 | 138.3 | 152.4 | 46.5  | 61.7  | 47.6  | 3.30  | 2.24 | 3.20 | 2.91 | 0.00015574 | 1 |
| Q96JP5 | ZFP91    | 1  | 96.1  | 94.5  | 101.7 | 103.9 | 105.5 | 98.3  | 0.92  | 0.90 | 1.03 | 0.95 | 0.17165694 | 1 |
| O00423 | EML1     | 1  | 111   | 64.7  | 104.7 | 89    | 135.3 | 95.3  | 1.25  | 0.48 | 1.10 | 0.94 | 0.55857813 | 1 |
| O95834 | EML2     | 6  | 105.7 | 129.4 | 63.4  | 94.3  | 70.6  | 136.6 | 1.12  | 1.83 | 0.46 | 1.14 | 0.97253386 | 1 |
| Q9HC35 | EML4     | 19 | 103.5 | 83.3  | 95.6  | 96.5  | 116.7 | 104.4 | 1.07  | 0.71 | 0.92 | 0.90 | 0.23088845 | 1 |
| Q96C19 | EFHD2    | 10 | 116   | 124   | 109.6 | 84    | 76    | 90.4  | 1.38  | 1.63 | 1.21 | 1.41 | 0.0049497  | 1 |
| Q14657 | LAGE3    | 3  | 157.5 | 121.5 | 156.2 | 42.5  | 78.5  | 43.8  | 3.71  | 1.55 | 3.57 | 2.94 | 0.00566923 | 1 |
| Q15717 | ELAVL1   | 13 | 124.2 | 105.3 | 121.9 | 75.8  | 94.7  | 78.1  | 1.64  | 1.11 | 1.56 | 1.44 | 0.01522671 | 1 |
| P13804 | ETFA     | 19 | 59.8  | 73    | 59.7  | 140.2 | 127   | 140.3 | 0.43  | 0.57 | 0.43 | 0.48 | 0.00032937 | 1 |
| P38117 | ETFB     | 21 | 59.5  | 76.1  | 65.9  | 140.5 | 123.9 | 134.1 | 0.42  | 0.61 | 0.49 | 0.51 | 0.00065645 | 1 |

|        |          |    |       |       |       |       |       |       |       |      |      |       |            |   |
|--------|----------|----|-------|-------|-------|-------|-------|-------|-------|------|------|-------|------------|---|
| Q05639 | EEF1A2   | 12 | 85.5  | 102.1 | 100.1 | 114.5 | 97.9  | 99.9  | 0.75  | 1.04 | 1.00 | 0.93  | 0.32990448 | 1 |
| P24534 | EEF1B2   | 6  | 105.6 | 104.6 | 101.8 | 94.4  | 95.4  | 98.2  | 1.12  | 1.10 | 1.04 | 1.08  | 0.00762891 | 1 |
| P29692 | EEF1D    | 16 | 110   | 96.5  | 103.5 | 90    | 103.5 | 96.5  | 1.22  | 0.93 | 1.07 | 1.08  | 0.29311771 | 1 |
| P26641 | EEF1G    | 24 | 135.1 | 118.9 | 126.1 | 64.9  | 81.1  | 73.9  | 2.08  | 1.47 | 1.71 | 1.75  | 0.0012882  | 1 |
| Q96RP9 | GFM1     | 15 | 94.9  | 89.1  | 91.7  | 105.1 | 110.9 | 108.3 | 0.90  | 0.80 | 0.85 | 0.85  | 0.002404   | 1 |
| Q9NYP7 | ELOVL5   | 1  | 134.3 | 139.4 | 154.1 | 65.7  | 60.6  | 45.9  | 2.04  | 2.30 | 3.36 | 2.57  | 0.0005305  | 1 |
| Q15370 | ELOB     | 10 | 125.4 | 119.5 | 132.3 | 74.6  | 80.5  | 67.7  | 1.68  | 1.48 | 1.95 | 1.71  | 0.00059844 | 1 |
| Q15369 | ELOC     | 3  | 130.1 | 118.6 | 127   | 69.9  | 81.4  | 73    | 1.86  | 1.46 | 1.74 | 1.69  | 0.00048492 | 1 |
| P50402 | EMD      | 13 | 92.9  | 63.8  | 107.6 | 107.1 | 136.2 | 92.4  | 0.87  | 0.47 | 1.16 | 0.83  | 0.26108375 | 1 |
| Q99961 | SH3GL1   | 10 | 87.8  | 161.8 | 149.6 | 112.2 | 38.2  | 50.4  | 0.78  | 4.24 | 2.97 | 2.66  | 0.11074725 | 1 |
| Q7Z2K6 | ERMP1    | 7  | 65.9  | 54    | 53.3  | 134.1 | 146   | 146.7 | 0.49  | 0.37 | 0.36 | 0.41  | 0.00012731 | 1 |
| P30040 | ERP29    | 15 | 103.8 | 82.5  | 94.5  | 96.2  | 117.5 | 105.5 | 1.08  | 0.70 | 0.90 | 0.89  | 0.2159997  | 1 |
| Q969X5 | ERGIC1   | 10 | 56.8  | 116.6 | 58.3  | 143.2 | 83.4  | 141.7 | 0.40  | 1.40 | 0.41 | 0.74  | 0.17731559 | 1 |
| Q9UPY3 | DICER1   | 12 | 168.9 | 166.5 | 147.7 | 31.1  | 33.5  | 52.3  | 5.43  | 4.97 | 2.82 | 4.41  | 0.00020967 | 1 |
| Q53H82 | LACTB2   | 19 | 94.3  | 79.9  | 89.6  | 105.7 | 120.1 | 110.4 | 0.89  | 0.67 | 0.81 | 0.79  | 0.01579778 | 1 |
| Q9UNN8 | PROCR    | 5  | 46.4  | 82.4  | 61    | 153.6 | 117.6 | 139   | 0.30  | 0.70 | 0.44 | 0.48  | 0.00765524 | 1 |
| Q96JJ3 | ELMO2    | 3  | 126.7 | 107.6 | 119.7 | 73.3  | 92.4  | 80.3  | 1.73  | 1.16 | 1.49 | 1.46  | 0.01031584 | 1 |
| P84090 | ERH      | 3  | 141.3 | 169.6 | 148.9 | 58.7  | 30.4  | 51.1  | 2.41  | 5.58 | 2.91 | 3.63  | 0.0008777  | 1 |
| Q9UHY7 | ENOPH1   | 5  | 95.8  | 74    | 109.9 | 104.2 | 126   | 90.1  | 0.92  | 0.59 | 1.22 | 0.91  | 0.41131163 | 1 |
| P42126 | ECI1     | 9  | 132   | 81.1  | 112.2 | 68    | 118.9 | 87.8  | 1.94  | 0.68 | 1.28 | 1.30  | 0.46589476 | 1 |
| O75521 | ECI2     | 7  | 129   | 112.9 | 121.2 | 71    | 87.1  | 78.8  | 1.82  | 1.30 | 1.54 | 1.55  | 0.00306256 | 1 |
| P30084 | ECHS1    | 16 | 87.5  | 79.4  | 89.1  | 112.5 | 120.6 | 110.9 | 0.78  | 0.66 | 0.80 | 0.75  | 0.00230297 | 1 |
| Q12929 | EPS8     | 14 | 73    | 70.4  | 92    | 127   | 129.6 | 108   | 0.57  | 0.54 | 0.85 | 0.66  | 0.01104939 | 1 |
| P42566 | EPS15    | 10 | 124.8 | 118.6 | 143.8 | 75.2  | 81.4  | 56.2  | 1.66  | 1.46 | 2.56 | 1.89  | 0.00560836 | 1 |
| Q9Y6I3 | EPN1     | 10 | 59.5  | 45.8  | 61.8  | 140.5 | 154.2 | 138.2 | 0.42  | 0.30 | 0.45 | 0.39  | 0.00023238 | 1 |
| O95208 | EPN2     | 5  | 130.1 | 121.8 | 143.9 | 69.9  | 78.2  | 56.1  | 1.86  | 1.56 | 2.57 | 1.99  | 0.00218416 | 1 |
| Q99808 | SLC29A1  | 4  | 192.8 | 138.3 | 156.4 | 7.2   | 61.7  | 43.6  | 26.78 | 2.24 | 3.59 | 10.87 | 0.00527459 | 1 |
| Q8N766 | EMC1     | 11 | 122.3 | 114.2 | 113   | 77.7  | 85.8  | 87    | 1.57  | 1.33 | 1.30 | 1.40  | 0.00133047 | 1 |
| Q15006 | EMC2     | 8  | 90.3  | 114.8 | 99.8  | 109.7 | 85.2  | 100.2 | 0.82  | 1.35 | 1.00 | 1.06  | 0.76224963 | 1 |
| Q9P0I2 | EMC3     | 6  | 100.7 | 112.7 | 88    | 99.3  | 87.3  | 112   | 1.01  | 1.29 | 0.79 | 1.03  | 0.93071412 | 1 |
| Q96HE7 | ERO1A    | 20 | 83.4  | 78.3  | 87.3  | 116.6 | 121.7 | 112.7 | 0.72  | 0.64 | 0.77 | 0.71  | 0.00076695 | 1 |
| P27105 | STOM     | 17 | 89.2  | 38.2  | 91.1  | 110.8 | 161.8 | 108.9 | 0.81  | 0.24 | 0.84 | 0.63  | 0.0908616  | 1 |
| P30042 | C21orf33 | 10 | 131.5 | 76    | 127.9 | 68.5  | 124   | 72.1  | 1.92  | 0.61 | 1.77 | 1.44  | 0.40468941 | 1 |
| Q9H0W9 | C11orf54 | 4  | 96    | 60    | 76.4  | 104   | 140   | 123.6 | 0.92  | 0.43 | 0.62 | 0.66  | 0.03757156 | 1 |
| Q8WZ82 | OVCA2    | 5  | 68.5  | 93.5  | 84.7  | 131.5 | 106.5 | 115.3 | 0.52  | 0.88 | 0.73 | 0.71  | 0.02649218 | 1 |
| Q8NBQ5 | HSD17B11 | 15 | 74    | 81.8  | 45.2  | 126   | 118.2 | 154.8 | 0.59  | 0.69 | 0.29 | 0.52  | 0.01377282 | 1 |
| Q9NTX5 | ECHDC1   | 10 | 114.7 | 132.5 | 112.4 | 85.3  | 67.5  | 87.6  | 1.34  | 1.96 | 1.28 | 1.53  | 0.01147969 | 1 |
| P15170 | GSPT1    | 8  | 95    | 90.2  | 97.6  | 105   | 109.8 | 102.4 | 0.90  | 0.82 | 0.95 | 0.89  | 0.02010536 | 1 |
| O00303 | EIF3F    | 11 | 127.9 | 120.5 | 119   | 72.1  | 79.5  | 81    | 1.77  | 1.52 | 1.47 | 1.59  | 0.00032098 | 1 |
| O15372 | EIF3H    | 14 | 133.3 | 123.5 | 129.3 | 66.7  | 76.5  | 70.7  | 2.00  | 1.61 | 1.83 | 1.81  | 0.00014019 | 1 |
| Q7L2H7 | EIF3M    | 13 | 108.5 | 120.3 | 127.6 | 91.5  | 79.7  | 72.4  | 1.19  | 1.51 | 1.76 | 1.49  | 0.00878819 | 1 |

|        |         |     |       |       |       |       |       |       |       |       |       |      |            |   |
|--------|---------|-----|-------|-------|-------|-------|-------|-------|-------|-------|-------|------|------------|---|
| P78344 | EIF4G2  | 32  | 130   | 121.5 | 134.8 | 70    | 78.5  | 65.2  | 1.86  | 1.55  | 2.07  | 1.82 | 0.00047174 | 1 |
| P23588 | EIF4B   | 18  | 129.4 | 116.5 | 120.8 | 70.6  | 83.5  | 79.2  | 1.83  | 1.40  | 1.53  | 1.58 | 0.00115524 | 1 |
| P06730 | EIF4E   | 6   | 116.6 | 89.9  | 102.4 | 83.4  | 110.1 | 97.6  | 1.40  | 0.82  | 1.05  | 1.09 | 0.61536682 | 1 |
| O60573 | EIF4E2  | 8   | 100   | 113.5 | 81.1  | 100   | 86.5  | 118.9 | 1.00  | 1.31  | 0.68  | 1.00 | 0.79986247 | 1 |
| Q15056 | EIF4H   | 11  | 147.5 | 105.5 | 152.4 | 52.5  | 94.5  | 47.6  | 2.81  | 1.12  | 3.20  | 2.38 | 0.02888385 | 1 |
| P56537 | EIF6    | 9   | 136.4 | 119.9 | 138.3 | 63.6  | 80.1  | 61.7  | 2.14  | 1.50  | 2.24  | 1.96 | 0.00158222 | 1 |
| Q5RKY6 | EXOSC6  | 9   | 136.7 | 113.3 | 157   | 63.3  | 86.7  | 43    | 2.16  | 1.31  | 3.65  | 2.37 | 0.0161966  | 1 |
| Q13868 | EXOSC2  | 10  | 132   | 92.3  | 141.3 | 68    | 107.7 | 58.7  | 1.94  | 0.86  | 2.41  | 1.74 | 0.10867896 | 1 |
| Q9NQT5 | EXOSC3  | 7   | 132.1 | 116.6 | 137.9 | 67.9  | 83.4  | 62.1  | 1.95  | 1.40  | 2.22  | 1.85 | 0.00302392 | 1 |
| Q9NPD3 | EXOSC4  | 5   | 143.8 | 102.8 | 119.8 | 56.2  | 97.2  | 80.2  | 2.56  | 1.06  | 1.49  | 1.70 | 0.05807072 | 1 |
| Q15024 | EXOSC7  | 10  | 132.6 | 101.7 | 141.4 | 67.4  | 98.3  | 58.6  | 1.97  | 1.03  | 2.41  | 1.80 | 0.04137144 | 1 |
| Q96B26 | EXOSC8  | 8   | 137.1 | 112   | 137.9 | 62.9  | 88    | 62.1  | 2.18  | 1.27  | 2.22  | 1.89 | 0.0085033  | 1 |
| Q9NQT4 | EXOSC5  | 6   | 123.1 | 104.5 | 167.4 | 76.9  | 95.5  | 32.6  | 1.60  | 1.09  | 5.13  | 2.61 | 0.07431771 | 1 |
| Q9Y2L1 | DIS3    | 6   | 100.2 | 122.9 | 139.6 | 99.8  | 77.1  | 60.4  | 1.00  | 1.59  | 2.31  | 1.64 | 0.06076643 | 1 |
| O14980 | XPO1    | 28  | 115.6 | 111.1 | 118.7 | 84.4  | 88.9  | 81.3  | 1.37  | 1.25  | 1.46  | 1.36 | 0.0006322  | 1 |
| Q9UIA9 | XPO7    | 10  | 89.2  | 95.3  | 81.4  | 110.8 | 104.7 | 118.6 | 0.81  | 0.91  | 0.69  | 0.80 | 0.01618157 | 1 |
| O43592 | XPOT    | 14  | 146.4 | 121.5 | 129.2 | 53.6  | 78.5  | 70.8  | 2.73  | 1.55  | 1.82  | 2.03 | 0.00340332 | 1 |
| Q9Y5B9 | SUPT16H | 5   | 76    | 85    | 78    | 124   | 115   | 122   | 0.61  | 0.74  | 0.64  | 0.66 | 0.00045845 | 1 |
| Q08945 | SSRP1   | 4   | 78    | 73.6  | 108.7 | 122   | 126.4 | 91.3  | 0.64  | 0.58  | 1.19  | 0.80 | 0.16528588 | 1 |
| P47755 | CAPZA2  | 11  | 93    | 107.3 | 100.3 | 107   | 92.7  | 99.7  | 0.87  | 1.16  | 1.01  | 1.01 | 0.94866606 | 1 |
| Q5VZK9 | CARMIL1 | 5   | 87.2  | 100.2 | 111.3 | 112.8 | 99.8  | 88.7  | 0.77  | 1.00  | 1.25  | 1.01 | 0.9341095  | 1 |
| Q96AE4 | FUBP1   | 23  | 117.6 | 112   | 118.1 | 82.4  | 88    | 81.9  | 1.43  | 1.27  | 1.44  | 1.38 | 0.00032644 | 1 |
| P14324 | FDPS    | 11  | 112.4 | 137.6 | 100.9 | 87.6  | 62.4  | 99.1  | 1.28  | 2.21  | 1.02  | 1.50 | 0.09121948 | 1 |
| P49327 | FASN    | 121 | 131.2 | 122.8 | 131.6 | 68.8  | 77.2  | 68.4  | 1.91  | 1.59  | 1.92  | 1.81 | 0.00014829 | 1 |
| Q0JRZ9 | FCHO2   | 3   | 93.8  | 112.6 | 134.2 | 106.2 | 87.4  | 65.8  | 0.88  | 1.29  | 2.04  | 1.40 | 0.17639739 | 1 |
| Q96EF6 | FBXO17  | 5   | 132.2 | 182   | 168.9 | 67.8  | 18    | 31.1  | 1.95  | 10.11 | 5.43  | 5.83 | 0.00441908 | 1 |
| Q9NRD1 | FBXO6   | 6   | 154.1 | 122.3 | 166   | 45.9  | 77.7  | 34    | 3.36  | 1.57  | 4.88  | 3.27 | 0.00676151 | 1 |
| Q96ME1 | FBXL18  | 5   | 156   | 150.3 | 173.4 | 44    | 49.7  | 26.6  | 3.55  | 3.02  | 6.52  | 4.36 | 0.00025972 | 1 |
| Q96AC1 | FERMT2  | 7   | 129   | 79.9  | 107.4 | 71    | 120.1 | 92.6  | 1.82  | 0.67  | 1.16  | 1.21 | 0.61734508 | 1 |
| Q9Y613 | FHOD1   | 6   | 129.1 | 147.1 | 150.7 | 70.9  | 52.9  | 49.3  | 1.82  | 2.78  | 3.06  | 2.55 | 0.00086079 | 1 |
| Q9Y2H6 | FNDC3A  | 2   | 83.5  | 49.3  | 68.5  | 116.5 | 150.7 | 131.5 | 0.72  | 0.33  | 0.52  | 0.52 | 0.00930179 | 1 |
| P21333 | FLNA    | 141 | 103.3 | 96    | 102.9 | 96.7  | 104   | 97.1  | 1.07  | 0.92  | 1.06  | 1.02 | 0.6842097  | 1 |
| Q5T1M5 | FKBP15  | 18  | 122.3 | 117.4 | 139.1 | 77.7  | 82.6  | 60.9  | 1.57  | 1.42  | 2.28  | 1.76 | 0.00482348 | 1 |
| Q8N3X1 | FNBP4   | 2   | 119   | 78.7  | 78.8  | 81    | 121.3 | 121.2 | 1.47  | 0.65  | 0.65  | 0.92 | 0.45538064 | 1 |
| Q13642 | FHL1    | 12  | 186.9 | 147.4 | 182.2 | 13.1  | 52.6  | 17.8  | 14.27 | 2.80  | 10.24 | 9.10 | 0.00120923 | 1 |
| Q14192 | FHL2    | 10  | 99    | 113.2 | 93.2  | 101   | 86.8  | 106.8 | 0.98  | 1.30  | 0.87  | 1.05 | 0.69036006 | 1 |
| P51114 | FXR1    | 8   | 147.8 | 138.4 | 134.3 | 52.2  | 61.6  | 65.7  | 2.83  | 2.25  | 2.04  | 2.37 | 0.00014221 | 1 |
| P51116 | FXR2    | 5   | 127.8 | 137.3 | 123   | 72.2  | 62.7  | 77    | 1.77  | 2.19  | 1.60  | 1.85 | 0.00058791 | 1 |
| O60353 | FZD6    | 1   | 121.5 | 62.7  | 84.4  | 78.5  | 137.3 | 115.6 | 1.55  | 0.46  | 0.73  | 0.91 | 0.43718221 | 1 |
| Q9H479 | FN3K    | 4   | 64.6  | 131.5 | 47.5  | 135.4 | 68.5  | 152.5 | 0.48  | 1.92  | 0.31  | 0.90 | 0.35816239 | 1 |
| Q9NQ88 | TIGAR   | 11  | 96.6  | 99.6  | 100.8 | 103.4 | 100.4 | 99.2  | 0.93  | 0.99  | 1.02  | 0.98 | 0.32079244 | 1 |

|        |         |    |       |       |       |       |       |       |      |      |      |      |            |   |
|--------|---------|----|-------|-------|-------|-------|-------|-------|------|------|------|------|------------|---|
| P04075 | ALDOA   | 28 | 89.3  | 81.3  | 90.4  | 110.7 | 118.7 | 109.6 | 0.81 | 0.68 | 0.82 | 0.77 | 0.00304132 | 1 |
| P09972 | ALDOC   | 4  | 98.2  | 84.8  | 92.3  | 101.8 | 115.2 | 107.7 | 0.96 | 0.74 | 0.86 | 0.85 | 0.03982627 | 1 |
| P07954 | FH      | 13 | 154.8 | 119.1 | 134.2 | 45.2  | 80.9  | 65.8  | 3.42 | 1.47 | 2.04 | 2.31 | 0.0078995  | 1 |
| Q96GK7 | FAHD2A  | 10 | 79.9  | 74.4  | 64.9  | 120.1 | 125.6 | 135.1 | 0.67 | 0.59 | 0.48 | 0.58 | 0.00096364 | 1 |
| Q9BQS8 | FYCO1   | 6  | 116.7 | 115.7 | 107.1 | 83.3  | 84.3  | 92.9  | 1.40 | 1.37 | 1.15 | 1.31 | 0.00362987 | 1 |
| P09382 | LGALS1  | 9  | 154.3 | 136.2 | 154   | 45.7  | 63.8  | 46    | 3.38 | 2.13 | 3.35 | 2.95 | 0.00033966 | 1 |
| O95166 | GABARAI | 1  | 88.6  | 75.8  | 92.6  | 111.4 | 124.2 | 107.4 | 0.80 | 0.61 | 0.86 | 0.76 | 0.01612022 | 1 |
| Q92820 | GGH     | 10 | 74.4  | 65.9  | 96    | 125.6 | 134.1 | 104   | 0.59 | 0.49 | 0.92 | 0.67 | 0.02852429 | 1 |
| O75223 | GGCT    | 10 | 119   | 120.2 | 107.7 | 81    | 79.8  | 92.3  | 1.47 | 1.51 | 1.17 | 1.38 | 0.00514829 | 1 |
| P19440 | GGT1    | 9  | 9.2   | 39    | 18    | 190.8 | 161   | 182   | 0.05 | 0.24 | 0.10 | 0.13 | 0.00023797 | 1 |
| Q12789 | GTF3C1  | 8  | 113   | 94.6  | 84.1  | 87    | 105.4 | 115.9 | 1.30 | 0.90 | 0.73 | 0.97 | 0.66726367 | 1 |
| P13984 | GTF2F2  | 6  | 133.3 | 119.4 | 150.4 | 66.7  | 80.6  | 49.6  | 2.00 | 1.48 | 3.03 | 2.17 | 0.0056118  | 1 |
| O60763 | USO1    | 11 | 129.9 | 105.8 | 111.5 | 70.1  | 94.2  | 88.5  | 1.85 | 1.12 | 1.26 | 1.41 | 0.03766782 | 1 |
| Q9NQX3 | GPHN    | 4  | 106.2 | 117.2 | 117.5 | 93.8  | 82.8  | 82.5  | 1.13 | 1.42 | 1.42 | 1.32 | 0.0065784  | 1 |
| P53611 | RABGGTF | 3  | 148.1 | 116.8 | 174.1 | 51.9  | 83.2  | 25.9  | 2.85 | 1.40 | 6.72 | 3.66 | 0.01673747 | 1 |
| Q3V6T2 | CCDC88A | 8  | 157.5 | 177.1 | 180.5 | 42.5  | 22.9  | 19.5  | 3.71 | 7.73 | 9.26 | 6.90 | 0.00014493 | 1 |
| P60983 | GMFB    | 6  | 104.4 | 88.7  | 86.4  | 95.6  | 111.3 | 113.6 | 1.09 | 0.80 | 0.76 | 0.88 | 0.16269594 | 1 |
| P04150 | NR3C1   | 2  | 74.1  | 93.8  | 89.8  | 125.9 | 106.2 | 110.2 | 0.59 | 0.88 | 0.81 | 0.76 | 0.02946634 | 1 |
| P46926 | GNPDA1  | 11 | 125.7 | 89.7  | 124.9 | 74.3  | 110.3 | 75.1  | 1.69 | 0.81 | 1.66 | 1.39 | 0.18471453 | 1 |
| Q8TDQ7 | GNPDA2  | 6  | 163.4 | 128.1 | 169.1 | 36.6  | 71.9  | 30.9  | 4.46 | 1.78 | 5.47 | 3.91 | 0.00411817 | 1 |
| Q6PCE3 | PGM2L1  | 3  | 81.5  | 48.4  | 30.9  | 118.5 | 151.6 | 169.1 | 0.69 | 0.32 | 0.18 | 0.40 | 0.01148568 | 1 |
| P06744 | GPI     | 34 | 92.8  | 72.7  | 81.1  | 107.2 | 127.3 | 118.9 | 0.87 | 0.57 | 0.68 | 0.71 | 0.01245684 | 1 |
| P00367 | GLUD1   | 31 | 93.4  | 106.5 | 111.6 | 106.6 | 93.5  | 88.4  | 0.88 | 1.14 | 1.26 | 1.09 | 0.37384415 | 1 |
| O94925 | GLS     | 19 | 1.9   | 42.7  | 36.5  | 198.1 | 157.3 | 163.5 | 0.01 | 0.27 | 0.22 | 0.17 | 0.00124546 | 1 |
| Q06210 | GFPT1   | 19 | 81.4  | 78.2  | 84.6  | 118.6 | 121.8 | 115.4 | 0.69 | 0.64 | 0.73 | 0.69 | 0.00014133 | 1 |
| Q2TAL8 | QRICH1  | 4  | 136.5 | 128.7 | 143.9 | 63.5  | 71.3  | 56.1  | 2.15 | 1.81 | 2.57 | 2.17 | 0.00030318 | 1 |
| P47897 | QARS    | 25 | 115.5 | 105   | 128.1 | 84.5  | 95    | 71.9  | 1.37 | 1.11 | 1.78 | 1.42 | 0.02651314 | 1 |
| P35754 | GLRX    | 3  | 3.8   | 19    | 39.4  | 196.2 | 181   | 160.6 | 0.02 | 0.10 | 0.25 | 0.12 | 0.00040664 | 1 |
| P21266 | GSTM3   | 4  | 147.4 | 44    | 134.2 | 52.6  | 156   | 65.8  | 2.80 | 0.28 | 2.04 | 1.71 | 0.72915738 | 1 |
| P78417 | GSTO1   | 19 | 101.6 | 103.4 | 102.7 | 98.4  | 96.6  | 97.3  | 1.03 | 1.07 | 1.06 | 1.05 | 0.00227771 | 1 |
| P09211 | GSTP1   | 13 | 89.2  | 66.6  | 32.5  | 110.8 | 133.4 | 167.5 | 0.81 | 0.50 | 0.19 | 0.50 | 0.03305198 | 1 |
| P04406 | GAPDH   | 35 | 108   | 94.6  | 108.7 | 92    | 105.4 | 91.3  | 1.17 | 0.90 | 1.19 | 1.09 | 0.31017056 | 1 |
| Q8N335 | GPD1L   | 7  | 65.3  | 88.8  | 64.3  | 134.7 | 111.2 | 135.7 | 0.48 | 0.80 | 0.47 | 0.59 | 0.00861542 | 1 |
| P43304 | GPD2    | 38 | 104.8 | 94.4  | 106.1 | 95.2  | 105.6 | 93.9  | 1.10 | 0.89 | 1.13 | 1.04 | 0.53678681 | 1 |
| A6NDG6 | PGP     | 12 | 64.9  | 94.7  | 57.5  | 135.1 | 105.3 | 142.5 | 0.48 | 0.90 | 0.40 | 0.59 | 0.02635832 | 1 |
| P23434 | GCSH    | 1  | 98.9  | 72.2  | 86    | 101.1 | 127.8 | 114   | 0.98 | 0.56 | 0.75 | 0.77 | 0.05859613 | 1 |
| P23378 | GLDC    | 13 | 141.1 | 156.6 | 156.8 | 58.9  | 43.4  | 43.2  | 2.40 | 3.61 | 3.63 | 3.21 | 0.00015079 | 1 |
| P06737 | PYGL    | 22 | 103.1 | 105.2 | 95    | 96.9  | 94.8  | 105   | 1.06 | 1.11 | 0.90 | 1.03 | 0.64316339 | 1 |
| P46976 | GYG1    | 8  | 147   | 162.6 | 166.9 | 53    | 37.4  | 33.1  | 2.77 | 4.35 | 5.04 | 4.05 | 0.00016151 | 1 |
| P30419 | NMT1    | 15 | 106.2 | 101.9 | 115.7 | 93.8  | 98.1  | 84.3  | 1.13 | 1.04 | 1.37 | 1.18 | 0.05127156 | 1 |
| Q9UBQ7 | GRHPR   | 16 | 89.9  | 79.9  | 84.8  | 110.1 | 120.1 | 115.2 | 0.82 | 0.67 | 0.74 | 0.74 | 0.00176676 | 1 |

|        |         |    |       |       |       |       |       |       |      |      |      |      |            |   |
|--------|---------|----|-------|-------|-------|-------|-------|-------|------|------|------|------|------------|---|
| Q92896 | GLG1    | 34 | 95.7  | 86.2  | 97.8  | 104.3 | 113.8 | 102.2 | 0.92 | 0.76 | 0.96 | 0.88 | 0.0551348  | 1 |
| O00461 | GOLIM4  | 6  | 113   | 113.2 | 123.9 | 87    | 86.8  | 76.1  | 1.30 | 1.30 | 1.63 | 1.41 | 0.00279381 | 1 |
| Q9H4A6 | GOLPH3  | 5  | 108.7 | 99    | 113.9 | 91.3  | 101   | 86.1  | 1.19 | 0.98 | 1.32 | 1.16 | 0.08006729 | 1 |
| Q9H3P7 | ACBD3   | 12 | 82.3  | 77.4  | 69.2  | 117.7 | 122.6 | 130.8 | 0.70 | 0.63 | 0.53 | 0.62 | 0.00093169 | 1 |
| O95249 | GOSR1   | 8  | 102.8 | 69.3  | 52.5  | 97.2  | 130.7 | 147.5 | 1.06 | 0.53 | 0.36 | 0.65 | 0.07402668 | 1 |
| Q7L5D6 | GET4    | 8  | 145.5 | 130.6 | 161.9 | 54.5  | 69.4  | 38.1  | 2.67 | 1.88 | 4.25 | 2.93 | 0.00197521 | 1 |
| Q92805 | GOLGA1  | 8  | 95.3  | 100.9 | 119.9 | 104.7 | 99.1  | 80.1  | 0.91 | 1.02 | 1.50 | 1.14 | 0.36560279 | 1 |
| Q08378 | GOLGA3  | 15 | 108.5 | 102.5 | 96.9  | 91.5  | 97.5  | 103.1 | 1.19 | 1.05 | 0.94 | 1.06 | 0.32850128 | 1 |
| Q13439 | GOLGA4  | 25 | 90.3  | 83    | 85    | 109.7 | 117   | 115   | 0.82 | 0.71 | 0.74 | 0.76 | 0.00083458 | 1 |
| Q8TBA6 | GOLGA5  | 14 | 128.8 | 141.2 | 116.2 | 71.2  | 58.8  | 83.8  | 1.81 | 2.40 | 1.39 | 1.87 | 0.00489487 | 1 |
| Q14789 | GOLGB1  | 67 | 96.6  | 96.5  | 101.6 | 103.4 | 103.5 | 98.4  | 0.93 | 0.93 | 1.03 | 0.97 | 0.21196863 | 1 |
| Q96S52 | PIGS    | 3  | 92.9  | 86.5  | 88    | 107.1 | 113.5 | 112   | 0.87 | 0.76 | 0.79 | 0.81 | 0.00135428 | 1 |
| Q96CP6 | GRAMD1  | 5  | 9.2   | 124.2 | 22.1  | 190.8 | 75.8  | 177.9 | 0.05 | 1.64 | 0.12 | 0.60 | 0.13441284 | 1 |
| P28676 | GCA     | 7  | 179.3 | 105.2 | 144.1 | 20.7  | 94.8  | 55.9  | 8.66 | 1.11 | 2.58 | 4.12 | 0.04720743 | 1 |
| P62993 | GRB2    | 16 | 110   | 89.7  | 105.1 | 90    | 110.3 | 94.9  | 1.22 | 0.81 | 1.11 | 1.05 | 0.73015304 | 1 |
| Q9H3K2 | GHITM   | 3  | 110.8 | 101.8 | 112.6 | 89.2  | 98.2  | 87.4  | 1.24 | 1.04 | 1.29 | 1.19 | 0.02367071 | 1 |
| Q9UIJ7 | AK3     | 16 | 68.3  | 109.2 | 71.5  | 131.7 | 90.8  | 128.5 | 0.52 | 1.20 | 0.56 | 0.76 | 0.141114   | 1 |
| P01116 | KRAS    | 2  | 101.9 | 124.9 | 70.8  | 98.1  | 75.1  | 129.2 | 1.04 | 1.66 | 0.55 | 1.08 | 0.94592804 | 1 |
| P01111 | NRAS    | 5  | 117.1 | 150.4 | 104   | 82.9  | 49.6  | 96    | 1.41 | 3.03 | 1.08 | 1.84 | 0.07117382 | 1 |
| P62826 | RAN     | 16 | 117.6 | 110.5 | 120.4 | 82.4  | 89.5  | 79.6  | 1.43 | 1.23 | 1.51 | 1.39 | 0.00148643 | 1 |
| Q15382 | RHEB    | 11 | 127.4 | 126.4 | 80.2  | 72.6  | 73.6  | 119.8 | 1.75 | 1.72 | 0.67 | 1.38 | 0.36144562 | 1 |
| Q9NR31 | SAR1A   | 5  | 137.2 | 103   | 130.4 | 62.8  | 97    | 69.6  | 2.18 | 1.06 | 1.87 | 1.71 | 0.03340737 | 1 |
| Q9Y6B6 | SAR1B   | 6  | 123   | 144.2 | 130.3 | 77    | 55.8  | 69.7  | 1.60 | 2.58 | 1.87 | 2.02 | 0.00178624 | 1 |
| Q14353 | GAMT    | 6  | 70.2  | 114.3 | 68.9  | 129.8 | 85.7  | 131.1 | 0.54 | 1.33 | 0.53 | 0.80 | 0.214944   | 1 |
| P04899 | GNAI2   | 4  | 150.2 | 175.7 | 115.4 | 49.8  | 24.3  | 84.6  | 3.02 | 7.23 | 1.36 | 3.87 | 0.01891599 | 1 |
| Q9UBI6 | GNG12   | 6  | 108.4 | 98.9  | 107.7 | 91.6  | 101.1 | 92.3  | 1.18 | 0.98 | 1.17 | 1.11 | 0.0817345  | 1 |
| P62873 | GNB1    | 8  | 95.3  | 123.1 | 98.4  | 104.7 | 76.9  | 101.6 | 0.91 | 1.60 | 0.97 | 1.16 | 0.41881641 | 1 |
| P62879 | GNB2    | 7  | 89.5  | 120.5 | 109.5 | 110.5 | 79.5  | 90.5  | 0.81 | 1.52 | 1.21 | 1.18 | 0.36832526 | 1 |
| P08754 | GNAI3   | 3  | 105.4 | 129.3 | 131.5 | 94.6  | 70.7  | 68.5  | 1.11 | 1.83 | 1.92 | 1.62 | 0.02022616 | 1 |
| Q5JWF2 | GNAS    | 5  | 102.5 | 101.4 | 76.9  | 97.5  | 98.6  | 123.1 | 1.05 | 1.03 | 0.62 | 0.90 | 0.33966296 | 1 |
| Q9HAV0 | GNB4    | 6  | 136.7 | 171.1 | 111.7 | 63.3  | 28.9  | 88.3  | 2.16 | 5.92 | 1.27 | 3.11 | 0.0307427  | 1 |
| Q9NPE3 | NOP10   | 1  | 129.1 | 119.3 | 85.7  | 70.9  | 80.7  | 114.3 | 1.82 | 1.48 | 0.75 | 1.35 | 0.28838027 | 1 |
| Q9BSH5 | HDHD3   | 6  | 67.6  | 66.5  | 93.5  | 132.4 | 133.5 | 106.5 | 0.51 | 0.50 | 0.88 | 0.63 | 0.01801593 | 1 |
| Q9P2D3 | HEATR5B | 5  | 101.4 | 96.3  | 104.8 | 98.6  | 103.7 | 95.2  | 1.03 | 0.93 | 1.10 | 1.02 | 0.6581738  | 1 |
| P0DMV9 | HSPA1B  | 29 | 84.8  | 80.5  | 88    | 115.2 | 119.5 | 112   | 0.74 | 0.67 | 0.79 | 0.73 | 0.0005342  | 1 |
| Q00613 | HSF1    | 2  | 110.4 | 102   | 116   | 89.6  | 98    | 84    | 1.23 | 1.04 | 1.38 | 1.22 | 0.03019347 | 1 |
| Q12931 | TRAP1   | 23 | 107.3 | 101   | 118.2 | 92.7  | 99    | 81.8  | 1.16 | 1.02 | 1.44 | 1.21 | 0.06773904 | 1 |
| P54652 | HSPA2   | 18 | 53.9  | 33.9  | 60.2  | 146.1 | 166.1 | 139.8 | 0.37 | 0.20 | 0.43 | 0.33 | 0.0008303  | 1 |
| Q9H910 | HN1L    | 9  | 115.9 | 106.9 | 114.4 | 84.1  | 93.1  | 85.6  | 1.38 | 1.15 | 1.34 | 1.29 | 0.00324601 | 1 |
| P09601 | HMOX1   | 18 | 53.6  | 89.1  | 47.2  | 146.4 | 110.9 | 152.8 | 0.37 | 0.80 | 0.31 | 0.49 | 0.01636362 | 1 |
| P30519 | HMOX2   | 13 | 142.3 | 120   | 119.8 | 57.7  | 80    | 80.2  | 2.47 | 1.50 | 1.49 | 1.82 | 0.00659184 | 1 |



|        |          |    |       |       |       |       |       |       |      |       |       |      |            |   |
|--------|----------|----|-------|-------|-------|-------|-------|-------|------|-------|-------|------|------------|---|
| Q5SSJ5 | HP1BP3   | 4  | 74.4  | 118.6 | 105.4 | 125.6 | 81.4  | 94.6  | 0.59 | 1.46  | 1.11  | 1.05 | 0.95684701 | 1 |
| Q99729 | HNRNPAE  | 10 | 134.3 | 136.5 | 124.1 | 65.7  | 63.5  | 75.9  | 2.04 | 2.15  | 1.64  | 1.94 | 0.000304   | 1 |
| Q13151 | HNRNPAC  | 15 | 90.4  | 104.7 | 93.7  | 109.6 | 95.3  | 106.3 | 0.82 | 1.10  | 0.88  | 0.93 | 0.28902168 | 1 |
| P51991 | HNRNPA3  | 22 | 115.7 | 145.4 | 114.4 | 84.3  | 54.6  | 85.6  | 1.37 | 2.66  | 1.34  | 1.79 | 0.02454644 | 1 |
| Q14103 | HNRNPD   | 18 | 110.8 | 144.1 | 137.5 | 89.2  | 55.9  | 62.5  | 1.24 | 2.58  | 2.20  | 2.01 | 0.0128598  | 1 |
| P52597 | HNRNPF   | 12 | 138.1 | 123.2 | 132.5 | 61.9  | 76.8  | 67.5  | 2.23 | 1.60  | 1.96  | 1.93 | 0.00052525 | 1 |
| P31943 | HNRNPH1  | 13 | 120.9 | 144.1 | 154.8 | 79.1  | 55.9  | 45.2  | 1.53 | 2.58  | 3.42  | 2.51 | 0.00485135 | 1 |
| P31942 | HNRNPH3  | 16 | 123.7 | 107.6 | 129.4 | 76.3  | 92.4  | 70.6  | 1.62 | 1.16  | 1.83  | 1.54 | 0.01184092 | 1 |
| Q8WVV9 | HNRNPLL  | 10 | 104.5 | 126.6 | 132.6 | 95.5  | 73.4  | 67.4  | 1.09 | 1.72  | 1.97  | 1.60 | 0.0245709  | 1 |
| Q1KMD3 | HNRNPUI  | 24 | 133.2 | 120.5 | 132.7 | 66.8  | 79.5  | 67.3  | 1.99 | 1.52  | 1.97  | 1.83 | 0.00060569 | 1 |
| P22626 | HNRNPA2  | 26 | 102.9 | 100.2 | 102.6 | 97.1  | 99.8  | 97.4  | 1.06 | 1.00  | 1.05  | 1.04 | 0.03468367 | 1 |
| P19367 | HK1      | 18 | 67.9  | 62.7  | 74.9  | 132.1 | 137.3 | 125.1 | 0.51 | 0.46  | 0.60  | 0.52 | 0.00022814 | 1 |
| P52789 | HK2      | 7  | 134.3 | 184.6 | 184.2 | 65.7  | 15.4  | 15.8  | 2.04 | 11.99 | 11.66 | 8.56 | 0.00458473 | 1 |
| P09429 | HMGB1    | 16 | 123.4 | 131.5 | 121.2 | 76.6  | 68.5  | 78.8  | 1.61 | 1.92  | 1.54  | 1.69 | 0.00033146 | 1 |
| P49773 | HINT1    | 6  | 109   | 98.1  | 101.3 | 91    | 101.9 | 98.7  | 1.20 | 0.96  | 1.03  | 1.06 | 0.28806224 | 1 |
| Q9BX68 | HINT2    | 3  | 106.4 | 87.1  | 111.7 | 93.6  | 112.9 | 88.3  | 1.14 | 0.77  | 1.27  | 1.06 | 0.75940652 | 1 |
| P12081 | HARS     | 21 | 143.6 | 131.3 | 149.4 | 56.4  | 68.7  | 50.6  | 2.55 | 1.91  | 2.95  | 2.47 | 0.00039081 | 1 |
| Q92769 | HDAC2    | 4  | 123.1 | 127.5 | 146.3 | 76.9  | 72.5  | 53.7  | 1.60 | 1.76  | 2.72  | 2.03 | 0.00302449 | 1 |
| Q9UBN7 | HDAC6    | 6  | 104.9 | 105.8 | 109.1 | 95.1  | 94.2  | 90.9  | 1.10 | 1.12  | 1.20  | 1.14 | 0.00186197 | 1 |
| O00422 | SAP18    | 5  | 163.1 | 153.6 | 132.2 | 36.9  | 46.4  | 67.8  | 4.42 | 3.31  | 1.95  | 3.23 | 0.00154468 | 1 |
| P10412 | HIST1H1E | 7  | 56    | 109.7 | 55.8  | 144   | 90.3  | 144.2 | 0.39 | 1.21  | 0.39  | 0.66 | 0.1080255  | 1 |
| Q92522 | H1FX     | 6  | 86.6  | 111.3 | 68    | 113.4 | 88.7  | 132   | 0.76 | 1.25  | 0.52  | 0.84 | 0.26916774 | 1 |
| POC0S8 | HIST1H2A | 2  | 115.2 | 118.5 | 123.5 | 84.8  | 81.5  | 76.5  | 1.36 | 1.45  | 1.61  | 1.48 | 0.0003649  | 1 |
| Q93077 | HIST1H2A | 1  | 140.8 | 150.8 | 104.4 | 59.2  | 49.2  | 95.6  | 2.38 | 3.07  | 1.09  | 2.18 | 0.0325933  | 1 |
| POC0S5 | H2AFZ    | 1  | 139.1 | 120.2 | 130.8 | 60.9  | 79.8  | 69.2  | 2.28 | 1.51  | 1.89  | 1.89 | 0.00148215 | 1 |
| O60814 | HIST1H2B | 2  | 127   | 71.3  | 123.6 | 73    | 128.7 | 76.4  | 1.74 | 0.55  | 1.62  | 1.30 | 0.59750705 | 1 |
| P68431 | HIST1H3A | 1  | 131.2 | 117.4 | 111.9 | 68.8  | 82.6  | 88.1  | 1.91 | 1.42  | 1.27  | 1.53 | 0.00766172 | 1 |
| P62805 | HIST1H4A | 10 | 124   | 116.6 | 113.5 | 76    | 83.4  | 86.5  | 1.63 | 1.40  | 1.31  | 1.45 | 0.00121181 | 1 |
| Q86X55 | CARM1    | 7  | 143.6 | 132.8 | 152.8 | 56.4  | 67.2  | 47.2  | 2.55 | 1.98  | 3.24  | 2.59 | 0.00045867 | 1 |
| Q16576 | RBBP7    | 6  | 116.8 | 134.4 | 106.3 | 83.2  | 65.6  | 93.7  | 1.40 | 2.05  | 1.13  | 1.53 | 0.02975071 | 1 |
| O43719 | HTATSF1  | 10 | 76.5  | 71.9  | 85.1  | 123.5 | 128.1 | 114.9 | 0.62 | 0.56  | 0.74  | 0.64 | 0.00126055 | 1 |
| P18462 | HLA-A    | 2  | 143.2 | 125.3 | 113.9 | 56.8  | 74.7  | 86.1  | 2.52 | 1.68  | 1.32  | 1.84 | 0.0103763  | 1 |
| P42858 | HTT      | 7  | 127.4 | 177.4 | 161.4 | 72.6  | 22.6  | 38.6  | 1.75 | 7.85  | 4.18  | 4.60 | 0.00602791 | 1 |
| Q16836 | HADH     | 12 | 95.2  | 80.6  | 107.2 | 104.8 | 119.4 | 92.8  | 0.91 | 0.68  | 1.16  | 0.91 | 0.35625219 | 1 |
| Q16775 | HAGH     | 9  | 52.7  | 76.4  | 66.4  | 147.3 | 123.6 | 133.6 | 0.36 | 0.62  | 0.50  | 0.49 | 0.00200202 | 1 |
| P35914 | HMGCL    | 8  | 78.3  | 67.9  | 137.9 | 121.7 | 132.1 | 62.1  | 0.64 | 0.51  | 2.22  | 1.13 | 0.74837682 | 1 |
| P00492 | HPRT1    | 13 | 120.5 | 95    | 118.8 | 79.5  | 105   | 81.2  | 1.52 | 0.90  | 1.46  | 1.29 | 0.12094992 | 1 |
| Q9Y5U9 | IER3IP1  | 1  | 106.3 | 81.6  | 51    | 93.7  | 118.4 | 149   | 1.13 | 0.69  | 0.34  | 0.72 | 0.14609344 | 1 |
| Q14974 | KPNB1    | 32 | 133.7 | 124.5 | 133   | 66.3  | 75.5  | 67    | 2.02 | 1.65  | 1.99  | 1.88 | 0.00013013 | 1 |
| Q8TEX9 | IPO4     | 17 | 114   | 107.6 | 101.7 | 86    | 92.4  | 98.3  | 1.33 | 1.16  | 1.03  | 1.17 | 0.03648416 | 1 |
| O95373 | IPO7     | 26 | 103.2 | 99.9  | 106.5 | 96.8  | 100.1 | 93.5  | 1.07 | 1.00  | 1.14  | 1.07 | 0.07638197 | 1 |

|        |          |    |       |       |       |       |       |       |       |       |      |      |            |   |
|--------|----------|----|-------|-------|-------|-------|-------|-------|-------|-------|------|------|------------|---|
| Q96P70 | IPO9     | 8  | 96.6  | 100.4 | 100.6 | 103.4 | 99.6  | 99.4  | 0.93  | 1.01  | 1.01 | 0.98 | 0.4336727  | 1 |
| Q9H2U2 | PPA2     | 16 | 92.9  | 70.3  | 91.8  | 107.1 | 129.7 | 108.2 | 0.87  | 0.54  | 0.85 | 0.75 | 0.04485673 | 1 |
| Q15181 | PPA1     | 17 | 106.2 | 98.1  | 103.1 | 93.8  | 101.9 | 96.9  | 1.13  | 0.96  | 1.06 | 1.05 | 0.2133841  | 1 |
| Q9BY32 | ITPA     | 7  | 115.2 | 77.6  | 106.2 | 84.8  | 122.4 | 93.8  | 1.36  | 0.63  | 1.13 | 1.04 | 0.9688202  | 1 |
| P12268 | IMPDH2   | 25 | 69.8  | 143.1 | 149   | 130.2 | 56.9  | 51    | 0.54  | 2.51  | 2.92 | 1.99 | 0.31588036 | 1 |
| Q14573 | ITPR3    | 4  | 132.8 | 115.1 | 79.4  | 67.2  | 84.9  | 120.6 | 1.98  | 1.36  | 0.66 | 1.33 | 0.45853548 | 1 |
| O43314 | PPIP5K2  | 3  | 139.4 | 150.1 | 164   | 60.6  | 49.9  | 36    | 2.30  | 3.01  | 4.56 | 3.29 | 0.00052829 | 1 |
| P29218 | IMPA1    | 12 | 149.2 | 109.2 | 152.6 | 50.8  | 90.8  | 47.4  | 2.94  | 1.20  | 3.22 | 2.45 | 0.01985898 | 1 |
| P14735 | IDE      | 18 | 79.3  | 88.6  | 60.5  | 120.7 | 111.4 | 139.5 | 0.66  | 0.80  | 0.43 | 0.63 | 0.01505059 | 1 |
| Q9Y6M1 | IGF2BP2  | 11 | 191.3 | 137.9 | 97.7  | 8.7   | 62.1  | 102.3 | 21.99 | 2.22  | 0.96 | 8.39 | 0.09196761 | 1 |
| P17301 | ITGA2    | 23 | 67.6  | 56.2  | 72.7  | 132.4 | 143.8 | 127.3 | 0.51  | 0.39  | 0.57 | 0.49 | 0.00056132 | 1 |
| P26006 | ITGA3    | 24 | 108   | 102.8 | 110   | 92    | 97.2  | 90    | 1.17  | 1.06  | 1.22 | 1.15 | 0.01026469 | 1 |
| P23229 | ITGA6    | 19 | 153.7 | 122.7 | 155.3 | 46.3  | 77.3  | 44.7  | 3.32  | 1.59  | 3.47 | 2.79 | 0.00425544 | 1 |
| P05556 | ITGB1    | 28 | 91.7  | 86.9  | 91.6  | 108.3 | 113.1 | 108.4 | 0.85  | 0.77  | 0.85 | 0.82 | 0.000892   | 1 |
| P05362 | ICAM1    | 6  | 138.6 | 121.7 | 128.3 | 61.4  | 78.3  | 71.7  | 2.26  | 1.55  | 1.79 | 1.87 | 0.00105363 | 1 |
| P15260 | IFNGR1   | 2  | 59.3  | 26.9  | 65.3  | 140.7 | 173.1 | 134.7 | 0.42  | 0.16  | 0.48 | 0.35 | 0.0042075  | 1 |
| Q8IU81 | IRF2BP1  | 4  | 79.5  | 71    | 101.6 | 120.5 | 129   | 98.4  | 0.66  | 0.55  | 1.03 | 0.75 | 0.06850385 | 1 |
| P80217 | IFI35    | 9  | 81.4  | 63.2  | 83.2  | 118.6 | 136.8 | 116.8 | 0.69  | 0.46  | 0.71 | 0.62 | 0.00597266 | 1 |
| P13164 | IFITM1   | 3  | 74    | 41.3  | 77.7  | 126   | 158.7 | 122.3 | 0.59  | 0.26  | 0.64 | 0.49 | 0.01205223 | 1 |
| O75569 | PRKRA    | 8  | 67.1  | 94    | 57.6  | 132.9 | 106   | 142.4 | 0.50  | 0.89  | 0.40 | 0.60 | 0.02454128 | 1 |
| Q9NZM3 | ITSN2    | 7  | 105.1 | 117.5 | 144.4 | 94.9  | 82.5  | 55.6  | 1.11  | 1.42  | 2.60 | 1.71 | 0.05282895 | 1 |
| Q27J81 | INF2     | 18 | 95.6  | 91.2  | 104.9 | 104.4 | 108.8 | 95.1  | 0.92  | 0.84  | 1.10 | 0.95 | 0.38746589 | 1 |
| Q2TAA2 | IAH1     | 8  | 23.4  | 71.4  | 51.3  | 176.6 | 128.6 | 148.7 | 0.13  | 0.56  | 0.34 | 0.34 | 0.00645881 | 1 |
| Q9NSE4 | IARS2    | 19 | 95.8  | 94    | 101.8 | 104.2 | 106   | 98.2  | 0.92  | 0.89  | 1.04 | 0.95 | 0.16838752 | 1 |
| Q13907 | IDI1     | 13 | 76.7  | 103.7 | 82.9  | 123.3 | 96.3  | 117.1 | 0.62  | 1.08  | 0.71 | 0.80 | 0.10147856 | 1 |
| Q9Y624 | F11R     | 3  | 39.4  | 50.3  | 73.9  | 160.6 | 149.7 | 126.1 | 0.25  | 0.34  | 0.59 | 0.39 | 0.00321577 | 1 |
| Q9BWU0 | SLC4A1A1 | 7  | 108.6 | 109.2 | 97.3  | 91.4  | 90.8  | 102.7 | 1.19  | 1.20  | 0.95 | 1.11 | 0.13974881 | 1 |
| Q14533 | KRT81    | 8  | 60.5  | 82.6  | 43.8  | 139.5 | 117.4 | 156.2 | 0.43  | 0.70  | 0.28 | 0.47 | 0.00900532 | 1 |
| Q9HA64 | FN3KRP   | 14 | 37.2  | 64.1  | 67.9  | 162.8 | 135.9 | 132.1 | 0.23  | 0.47  | 0.51 | 0.40 | 0.00309417 | 1 |
| Q96EK5 | KIF1BP   | 4  | 143.5 | 162.4 | 129.1 | 56.5  | 37.6  | 70.9  | 2.54  | 4.32  | 1.82 | 2.89 | 0.00273038 | 1 |
| Q86UP2 | KTN1     | 40 | 90.3  | 79.6  | 89.3  | 109.7 | 120.4 | 110.7 | 0.82  | 0.66  | 0.81 | 0.76 | 0.00487577 | 1 |
| Q9H0B6 | KLC2     | 8  | 72.8  | 50.2  | 57.1  | 127.2 | 149.8 | 142.9 | 0.57  | 0.34  | 0.40 | 0.44 | 0.0010733  | 1 |
| Q9NSK0 | KLC4     | 5  | 138.9 | 157.8 | 162.5 | 61.1  | 42.2  | 37.5  | 2.27  | 3.74  | 4.33 | 3.45 | 0.0004817  | 1 |
| O00139 | KIF2A    | 7  | 131.9 | 141.1 | 153.9 | 68.1  | 58.9  | 46.1  | 1.94  | 2.40  | 3.34 | 2.56 | 0.00072036 | 1 |
| O15066 | KIF3B    | 3  | 151.5 | 100   | 146.4 | 48.5  | 100   | 53.6  | 3.12  | 1.00  | 2.73 | 2.29 | 0.04797498 | 1 |
| O14777 | NDC80    | 8  | 170.6 | 187.3 | 114.4 | 29.4  | 12.7  | 85.6  | 5.80  | 14.75 | 1.34 | 7.30 | 0.02113775 | 1 |
| O43291 | SPINT2   | 7  | 49.1  | 113.6 | 79.5  | 150.9 | 86.4  | 120.5 | 0.33  | 1.31  | 0.66 | 0.77 | 0.21740993 | 1 |
| Q04760 | GLO1     | 11 | 154.5 | 144.5 | 164.3 | 45.5  | 55.5  | 35.7  | 3.40  | 2.60  | 4.60 | 3.53 | 0.00017586 | 1 |
| P42167 | TMPO     | 2  | 112.2 | 107.4 | 104.1 | 87.8  | 92.6  | 95.9  | 1.28  | 1.16  | 1.09 | 1.17 | 0.0089647  | 1 |
| Q14739 | LBR      | 4  | 114.4 | 93.7  | 116.6 | 85.6  | 106.3 | 83.4  | 1.34  | 0.88  | 1.40 | 1.21 | 0.18566578 | 1 |
| P20700 | LMNB1    | 23 | 132.5 | 150.6 | 124.8 | 67.5  | 49.4  | 75.2  | 1.96  | 3.05  | 1.66 | 2.22 | 0.00265254 | 1 |

|        |          |    |       |       |       |       |       |       |       |      |      |      |            |   |
|--------|----------|----|-------|-------|-------|-------|-------|-------|-------|------|------|------|------------|---|
| O15230 | LAMA5    | 23 | 53.8  | 57.3  | 72.1  | 146.2 | 142.7 | 127.9 | 0.37  | 0.40 | 0.56 | 0.44 | 0.00060355 | 1 |
| P11047 | LAMC1    | 16 | 125.8 | 113.9 | 115.9 | 74.2  | 86.1  | 84.1  | 1.70  | 1.32 | 1.38 | 1.47 | 0.00205194 | 1 |
| P48449 | LSS      | 10 | 95.4  | 99.3  | 78.2  | 104.6 | 100.7 | 121.8 | 0.91  | 0.99 | 0.64 | 0.85 | 0.12004624 | 1 |
| Q6PKG0 | LARP1    | 33 | 177.6 | 177.3 | 156.2 | 22.4  | 22.7  | 43.8  | 7.93  | 7.81 | 3.57 | 6.44 | 0.000149   | 1 |
| Q71RC2 | LARP4    | 5  | 123.2 | 137.1 | 143.9 | 76.8  | 62.9  | 56.1  | 1.60  | 2.18 | 2.57 | 2.12 | 0.0012846  | 1 |
| Q92615 | LARP4B   | 3  | 129.7 | 136.7 | 118.1 | 70.3  | 63.3  | 81.9  | 1.84  | 2.16 | 1.44 | 1.82 | 0.00183025 | 1 |
| Q4G0J3 | LARP7    | 6  | 139.3 | 159.9 | 149.1 | 60.7  | 40.1  | 50.9  | 2.29  | 3.99 | 2.93 | 3.07 | 0.0003     | 1 |
| Q01650 | SLC7A5   | 5  | 43.7  | 72.5  | 47.8  | 156.3 | 127.5 | 152.2 | 0.28  | 0.57 | 0.31 | 0.39 | 0.00204859 | 1 |
| Q9UK59 | DBR1     | 4  | 136.7 | 158.6 | 131.8 | 63.3  | 41.4  | 68.2  | 2.16  | 3.83 | 1.93 | 2.64 | 0.00189949 | 1 |
| Q15334 | LLGL1    | 7  | 142.2 | 149.1 | 110.1 | 57.8  | 50.9  | 89.9  | 2.46  | 2.93 | 1.22 | 2.20 | 0.01642873 | 1 |
| Q86V48 | LUZP1    | 5  | 187.3 | 128.9 | 179.6 | 12.7  | 71.1  | 20.4  | 14.75 | 1.81 | 8.80 | 8.45 | 0.00728912 | 1 |
| P42704 | LRPPRC   | 78 | 107   | 100.1 | 107.5 | 93    | 99.9  | 92.5  | 1.15  | 1.00 | 1.16 | 1.10 | 0.04490081 | 1 |
| Q9UFC0 | LRWD1    | 4  | 123   | 147.5 | 175.9 | 77    | 52.5  | 24.1  | 1.60  | 2.81 | 7.30 | 3.90 | 0.01069749 | 1 |
| Q32MZ4 | LRRFIP1  | 21 | 100   | 76.3  | 95.7  | 100   | 123.7 | 104.3 | 1.00  | 0.62 | 0.92 | 0.84 | 0.14443673 | 1 |
| Q96AG4 | LRRCS59  | 19 | 70.8  | 100.5 | 68.6  | 129.2 | 99.5  | 131.4 | 0.55  | 1.01 | 0.52 | 0.69 | 0.05114861 | 1 |
| Q9UIQ6 | LNPEP    | 17 | 114.7 | 100.5 | 110.3 | 85.3  | 99.5  | 89.7  | 1.34  | 1.01 | 1.23 | 1.19 | 0.04573228 | 1 |
| Q08722 | CD47     | 2  | 101.4 | 95.5  | 98.6  | 98.6  | 104.5 | 101.4 | 1.03  | 0.91 | 0.97 | 0.97 | 0.28109961 | 1 |
| P09960 | LTA4H    | 20 | 104.6 | 95.1  | 98.7  | 95.4  | 104.9 | 101.3 | 1.10  | 0.91 | 0.97 | 0.99 | 0.79881054 | 1 |
| P48059 | LIMS1    | 5  | 79.8  | 98.7  | 73.7  | 120.2 | 101.3 | 126.3 | 0.66  | 0.97 | 0.58 | 0.74 | 0.04017104 | 1 |
| Q14847 | LASP1    | 21 | 57.2  | 31.7  | 55.9  | 142.8 | 168.3 | 144.1 | 0.40  | 0.19 | 0.39 | 0.33 | 0.00091056 | 1 |
| Q9H6V9 | LDAH     | 5  | 134.8 | 128.4 | 54.7  | 65.2  | 71.6  | 145.3 | 2.07  | 1.79 | 0.38 | 1.41 | 0.75912755 | 1 |
| Q9P260 | KIAA1468 | 5  | 111.7 | 96.6  | 91.6  | 88.3  | 103.4 | 108.4 | 1.27  | 0.93 | 0.85 | 1.01 | 0.99414811 | 1 |
| P00338 | LDHA     | 29 | 67.4  | 128   | 67.4  | 132.6 | 72    | 132.6 | 0.51  | 1.78 | 0.51 | 0.93 | 0.43430421 | 1 |
| P07195 | LDHB     | 21 | 101.8 | 128.5 | 101.9 | 98.2  | 71.5  | 98.1  | 1.04  | 1.80 | 1.04 | 1.29 | 0.1626841  | 1 |
| P36776 | LONP1    | 14 | 73.3  | 94.2  | 108   | 126.7 | 105.8 | 92    | 0.58  | 0.89 | 1.17 | 0.88 | 0.31605684 | 1 |
| Q6P1M0 | SLC27A4  | 6  | 93.9  | 100.1 | 119.6 | 106.1 | 99.9  | 80.4  | 0.89  | 1.00 | 1.49 | 1.12 | 0.45421993 | 1 |
| P33121 | ACSL1    | 9  | 96.4  | 85.4  | 50.9  | 103.6 | 114.6 | 149.1 | 0.93  | 0.75 | 0.34 | 0.67 | 0.08161205 | 1 |
| O95573 | ACSL3    | 26 | 103   | 96.3  | 106.4 | 97    | 103.7 | 93.6  | 1.06  | 0.93 | 1.14 | 1.04 | 0.41635528 | 1 |
| O60488 | ACSL4    | 21 | 103.2 | 95.7  | 102.2 | 96.8  | 104.3 | 97.8  | 1.07  | 0.92 | 1.04 | 1.01 | 0.83624112 | 1 |
| P24666 | ACP1     | 7  | 71    | 61.4  | 46.2  | 129   | 138.6 | 153.8 | 0.55  | 0.44 | 0.30 | 0.43 | 0.00137105 | 1 |
| P01130 | LDLR     | 7  | 116.1 | 131.1 | 164.5 | 83.9  | 68.9  | 35.5  | 1.38  | 1.90 | 4.63 | 2.64 | 0.02118387 | 1 |
| P05455 | SSB      | 28 | 114.7 | 104.3 | 118.7 | 85.3  | 95.7  | 81.3  | 1.34  | 1.09 | 1.46 | 1.30 | 0.0143636  | 1 |
| Q7Z4W1 | DCXR     | 7  | 47.8  | 84.6  | 42.1  | 152.2 | 115.4 | 157.9 | 0.31  | 0.73 | 0.27 | 0.44 | 0.01131671 | 1 |
| Q5VWZ2 | LYPLAL1  | 6  | 54.6  | 71.7  | 85.2  | 145.4 | 128.3 | 114.8 | 0.38  | 0.56 | 0.74 | 0.56 | 0.00922591 | 1 |
| Q14108 | SCARB2   | 10 | 67.3  | 62.8  | 74.3  | 132.7 | 137.2 | 125.7 | 0.51  | 0.46 | 0.59 | 0.52 | 0.00017578 | 1 |
| P11279 | LAMP1    | 6  | 91.6  | 81.7  | 88.4  | 108.4 | 118.3 | 111.6 | 0.85  | 0.69 | 0.79 | 0.78 | 0.00346249 | 1 |
| P13473 | LAMP2    | 1  | 80.6  | 65.3  | 79.8  | 119.4 | 134.7 | 120.2 | 0.68  | 0.48 | 0.66 | 0.61 | 0.00214069 | 1 |
| Q96C86 | DCPS     | 9  | 143.8 | 82    | 125.5 | 56.2  | 118   | 74.5  | 2.56  | 0.69 | 1.68 | 1.65 | 0.25746784 | 1 |
| P14174 | MIF      | 2  | 100.8 | 97.9  | 88.5  | 99.2  | 102.1 | 111.5 | 1.02  | 0.96 | 0.79 | 0.92 | 0.1794022  | 1 |
| Q14728 | MFSD10   | 1  | 128.7 | 120.1 | 130.6 | 71.3  | 79.9  | 69.4  | 1.81  | 1.50 | 1.88 | 1.73 | 0.00031694 | 1 |
| P04156 | PRNP     | 2  | 85.6  | 35.5  | 124.7 | 114.4 | 164.5 | 75.3  | 0.75  | 0.22 | 1.66 | 0.87 | 0.37832876 | 1 |

|        |          |    |       |       |       |       |       |       |       |      |      |       |            |   |
|--------|----------|----|-------|-------|-------|-------|-------|-------|-------|------|------|-------|------------|---|
| Q14764 | MVP      | 45 | 87.9  | 78.4  | 86.7  | 112.1 | 121.6 | 113.3 | 0.78  | 0.64 | 0.77 | 0.73  | 0.00176261 | 1 |
| P40926 | MDH2     | 22 | 118   | 94.5  | 120.5 | 82    | 105.5 | 79.5  | 1.44  | 0.90 | 1.52 | 1.28  | 0.13352102 | 1 |
| Q14165 | MLEC     | 14 | 80.8  | 64    | 69.6  | 119.2 | 136   | 130.4 | 0.68  | 0.47 | 0.53 | 0.56  | 0.00122172 | 1 |
| Q9UM22 | EPDR1    | 3  | 35.6  | 70.8  | 41.8  | 164.4 | 129.2 | 158.2 | 0.22  | 0.55 | 0.26 | 0.34  | 0.00273662 | 1 |
| Q9HD20 | ATP13A1  | 11 | 105.9 | 140.5 | 148.7 | 94.1  | 59.5  | 51.3  | 1.13  | 2.36 | 2.90 | 2.13  | 0.02682531 | 1 |
| O75352 | MPDU1    | 1  | 88.5  | 82.3  | 100.5 | 111.5 | 117.7 | 99.5  | 0.79  | 0.70 | 1.01 | 0.83  | 0.0644865  | 1 |
| Q13724 | MOGS     | 6  | 109.3 | 120.3 | 104.1 | 90.7  | 79.7  | 95.9  | 1.21  | 1.51 | 1.09 | 1.27  | 0.02919532 | 1 |
| P49006 | MARCKSI  | 3  | 64.8  | 90.2  | 91.4  | 135.2 | 109.8 | 108.6 | 0.48  | 0.82 | 0.84 | 0.71  | 0.04354157 | 1 |
| Q9NZD8 | SPG21    | 6  | 101.9 | 137.9 | 115.3 | 98.1  | 62.1  | 84.7  | 1.04  | 2.22 | 1.36 | 1.54  | 0.06875331 | 1 |
| Q14676 | MDC1     | 17 | 197.2 | 179.6 | 170.2 | 2.8   | 20.4  | 29.8  | 70.43 | 8.80 | 5.71 | 28.31 | 0.00012415 | 1 |
| Q15648 | MED1     | 4  | 152.2 | 160.7 | 41    | 47.8  | 39.3  | 159   | 3.18  | 4.09 | 0.26 | 2.51  | 0.54595071 | 1 |
| Q96PC5 | MIA2     | 6  | 56.7  | 64.3  | 71.6  | 143.3 | 135.7 | 128.4 | 0.40  | 0.47 | 0.56 | 0.48  | 0.00029816 | 1 |
| Q8N4V1 | MMGT1    | 2  | 122.7 | 105.1 | 94.7  | 77.3  | 94.9  | 105.3 | 1.59  | 1.11 | 0.90 | 1.20  | 0.2640738  | 1 |
| O00264 | PGRMC1   | 13 | 84.9  | 88.4  | 91.8  | 115.1 | 111.6 | 108.2 | 0.74  | 0.79 | 0.85 | 0.79  | 0.0011724  | 1 |
| O15173 | PGRMC2   | 8  | 76.3  | 127.1 | 91    | 123.7 | 72.9  | 109   | 0.62  | 1.74 | 0.83 | 1.07  | 0.86964261 | 1 |
| P55145 | MANF     | 7  | 114.6 | 110   | 117.5 | 85.4  | 90    | 82.5  | 1.34  | 1.22 | 1.42 | 1.33  | 0.0008125  | 1 |
| Q13505 | MTX1     | 8  | 111.5 | 112.7 | 149.3 | 88.5  | 87.3  | 50.7  | 1.26  | 1.29 | 2.94 | 1.83  | 0.04915513 | 1 |
| O75431 | MTX2     | 5  | 76.5  | 42.1  | 73.7  | 123.5 | 157.9 | 126.3 | 0.62  | 0.27 | 0.58 | 0.49  | 0.01000773 | 1 |
| Q9NZL9 | MAT2B    | 12 | 84.2  | 42.2  | 93.8  | 115.8 | 157.8 | 106.2 | 0.73  | 0.27 | 0.88 | 0.63  | 0.07646681 | 1 |
| P50579 | METAP2   | 12 | 112.9 | 125.9 | 132.3 | 87.1  | 74.1  | 67.7  | 1.30  | 1.70 | 1.95 | 1.65  | 0.00419962 | 1 |
| Q96RQ3 | MCCC1    | 4  | 159.5 | 99.5  | 132   | 40.5  | 100.5 | 68    | 3.94  | 0.99 | 1.94 | 2.29  | 0.06866286 | 1 |
| Q15800 | MSMO1    | 2  | 99.7  | 87.2  | 83.6  | 100.3 | 112.8 | 116.4 | 0.99  | 0.77 | 0.72 | 0.83  | 0.04637356 | 1 |
| Q96GX9 | APIP     | 9  | 112.2 | 68.8  | 114.7 | 87.8  | 131.2 | 85.3  | 1.28  | 0.52 | 1.34 | 1.05  | 0.89836488 | 1 |
| P22670 | RFX1     | 5  | 146.9 | 162.3 | 166.7 | 53.1  | 37.7  | 33.3  | 2.77  | 4.31 | 5.01 | 4.03  | 0.00015917 | 1 |
| Q8N3F8 | MICALL1  | 11 | 158.7 | 146.6 | 169.9 | 41.3  | 53.4  | 30.1  | 3.84  | 2.75 | 5.64 | 4.08  | 0.00025291 | 1 |
| Q9NX63 | CHCHD3   | 14 | 72    | 57.4  | 84.6  | 128   | 142.6 | 115.4 | 0.56  | 0.40 | 0.73 | 0.57  | 0.00670499 | 1 |
| Q9BUR5 | APOO     | 4  | 124.5 | 109.9 | 124   | 75.5  | 90.1  | 76    | 1.65  | 1.22 | 1.63 | 1.50  | 0.00452743 | 1 |
| Q16891 | IMMT     | 14 | 96.3  | 92.1  | 98.3  | 103.7 | 107.9 | 101.7 | 0.93  | 0.85 | 0.97 | 0.92  | 0.02649292 | 1 |
| O14880 | MGST3    | 5  | 55.6  | 49.8  | 75    | 144.4 | 150.2 | 125   | 0.39  | 0.33 | 0.60 | 0.44  | 0.00177934 | 1 |
| Q15691 | MAPRE1   | 18 | 142.4 | 90.7  | 141.5 | 57.6  | 109.3 | 58.5  | 2.47  | 0.83 | 2.42 | 1.91  | 0.10866125 | 1 |
| Q15555 | MAPRE2   | 4  | 75.7  | 89.5  | 91.7  | 124.3 | 110.5 | 108.3 | 0.61  | 0.81 | 0.85 | 0.76  | 0.0153773  | 1 |
| A6NCE7 | MAP1LC3  | 2  | 135.4 | 118.9 | 114.9 | 64.6  | 81.1  | 85.1  | 2.10  | 1.47 | 1.35 | 1.64  | 0.00651814 | 1 |
| Q8N183 | NDUFAF2  | 7  | 126.3 | 115.6 | 97.3  | 73.7  | 84.4  | 102.7 | 1.71  | 1.37 | 0.95 | 1.34  | 0.09447858 | 1 |
| Q8TCT9 | HM13     | 7  | 128.4 | 122.9 | 133.4 | 71.6  | 77.1  | 66.6  | 1.79  | 1.59 | 2.00 | 1.80  | 0.00019212 | 1 |
| Q02978 | SLC25A11 | 14 | 60.5  | 95    | 65    | 139.5 | 105   | 135   | 0.43  | 0.90 | 0.48 | 0.61  | 0.0257937  | 1 |
| Q7Z434 | MAVS     | 12 | 60.2  | 63.5  | 72.9  | 139.8 | 136.5 | 127.1 | 0.43  | 0.47 | 0.57 | 0.49  | 0.00021393 | 1 |
| O43772 | SLC25A20 | 3  | 117.5 | 73.4  | 104.6 | 82.5  | 126.6 | 95.4  | 1.42  | 0.58 | 1.10 | 1.03  | 0.87912567 | 1 |
| Q9UBX3 | SLC25A10 | 9  | 65.5  | 115   | 53    | 134.5 | 85    | 147   | 0.49  | 1.35 | 0.36 | 0.73  | 0.17306752 | 1 |
| Q9Y3D6 | FIS1     | 2  | 122.1 | 109.9 | 122.5 | 77.9  | 90.1  | 77.5  | 1.57  | 1.22 | 1.58 | 1.46  | 0.00341476 | 1 |
| Q9GZY8 | MFF      | 7  | 104.9 | 32.8  | 90.1  | 95.1  | 167.2 | 109.9 | 1.10  | 0.20 | 0.82 | 0.71  | 0.19652277 | 1 |
| Q9BQP7 | MGME1    | 7  | 71.3  | 105.6 | 93.4  | 128.7 | 94.4  | 106.6 | 0.55  | 1.12 | 0.88 | 0.85  | 0.23555579 | 1 |

|        |          |     |       |       |       |       |       |       |       |      |      |      |            |   |
|--------|----------|-----|-------|-------|-------|-------|-------|-------|-------|------|------|------|------------|---|
| Q9H936 | SLC25A22 | 9   | 78.5  | 108.3 | 64.4  | 121.5 | 91.7  | 135.6 | 0.65  | 1.18 | 0.47 | 0.77 | 0.15007505 | 1 |
| Q9Y5L4 | TIMM13   | 4   | 141.1 | 129.5 | 104.9 | 58.9  | 70.5  | 95.1  | 2.40  | 1.84 | 1.10 | 1.78 | 0.02897299 | 1 |
| Q9Y3D7 | PAM16    | 3   | 124.8 | 112.3 | 79    | 75.2  | 87.7  | 121   | 1.66  | 1.28 | 0.65 | 1.20 | 0.60829623 | 1 |
| Q99595 | TIMM17A  | 2   | 110.3 | 98    | 65.4  | 89.7  | 102   | 134.6 | 1.23  | 0.96 | 0.49 | 0.89 | 0.40708402 | 1 |
| O60830 | TIMM17B  | 4   | 95    | 84.7  | 155   | 105   | 115.3 | 45    | 0.90  | 0.73 | 3.44 | 1.69 | 0.49697479 | 1 |
| Q15785 | TOMM34   | 14  | 154.6 | 128.4 | 154.8 | 45.4  | 71.6  | 45.2  | 3.41  | 1.79 | 3.42 | 2.87 | 0.00177002 | 1 |
| O94826 | TOMM70   | 24  | 114.8 | 102.2 | 113.7 | 85.2  | 97.8  | 86.3  | 1.35  | 1.04 | 1.32 | 1.24 | 0.02292479 | 1 |
| Q9Y619 | SLC25A15 | 3   | 41    | 79.5  | 58.3  | 159   | 120.5 | 141.7 | 0.26  | 0.66 | 0.41 | 0.44 | 0.00682914 | 1 |
| Q8IXI1 | RHOT2    | 3   | 161.1 | 93.7  | 75.4  | 38.9  | 106.3 | 124.6 | 4.14  | 0.88 | 0.61 | 1.88 | 0.61387666 | 1 |
| Q7L0Y3 | TRMT10C  | 7   | 125.7 | 153.8 | 127.8 | 74.3  | 46.2  | 72.2  | 1.69  | 3.33 | 1.77 | 2.26 | 0.00500131 | 1 |
| Q9Y2U5 | MAP3K2   | 5   | 99.5  | 68.2  | 106.9 | 100.5 | 131.8 | 93.1  | 0.99  | 0.52 | 1.15 | 0.89 | 0.36982835 | 1 |
| O95819 | MAP4K4   | 4   | 125   | 152.2 | 164.4 | 75    | 47.8  | 35.6  | 1.67  | 3.18 | 4.62 | 3.16 | 0.00458745 | 1 |
| O43684 | BUB3     | 10  | 74.7  | 113.8 | 125.6 | 125.3 | 86.2  | 74.4  | 0.60  | 1.32 | 1.69 | 1.20 | 0.68793038 | 1 |
| Q9Y6D9 | MAD1L1   | 8   | 139.3 | 144.5 | 128.2 | 60.7  | 55.5  | 71.8  | 2.29  | 2.60 | 1.79 | 2.23 | 0.00039048 | 1 |
| Q6NZ67 | MZT2B    | 3   | 125.2 | 124.9 | 82.1  | 74.8  | 75.1  | 117.9 | 1.67  | 1.66 | 0.70 | 1.34 | 0.34881513 | 1 |
| Q9BYG3 | NIFK     | 4   | 100.1 | 80    | 110.2 | 99.9  | 120   | 89.8  | 1.00  | 0.67 | 1.23 | 0.97 | 0.63359349 | 1 |
| Q96T76 | MMS19    | 10  | 141.7 | 124.9 | 136.6 | 58.3  | 75.1  | 63.4  | 2.43  | 1.66 | 2.15 | 2.08 | 0.00061185 | 1 |
| P53985 | SLC16A1  | 5   | 134.1 | 133.7 | 121.2 | 65.9  | 66.3  | 78.8  | 2.03  | 2.02 | 1.54 | 1.86 | 0.00058271 | 1 |
| O15427 | SLC16A3  | 5   | 125.1 | 105.2 | 124.6 | 74.9  | 94.8  | 75.4  | 1.67  | 1.11 | 1.65 | 1.48 | 0.01681515 | 1 |
| Q99685 | MGLL     | 11  | 66.7  | 96.5  | 48    | 133.3 | 103.5 | 152   | 0.50  | 0.93 | 0.32 | 0.58 | 0.04138455 | 1 |
| Q9H3R2 | MUC13    | 2   | 111.2 | 13    | 30    | 88.8  | 187   | 170   | 1.25  | 0.07 | 0.18 | 0.50 | 0.08588514 | 1 |
| P33527 | ABCC1    | 37  | 17.1  | 52.2  | 15.4  | 182.9 | 147.8 | 184.6 | 0.09  | 0.35 | 0.08 | 0.18 | 0.00106852 | 1 |
| Q9UI30 | TRMT112  | 3   | 123.7 | 112.2 | 114.4 | 76.3  | 87.8  | 85.6  | 1.62  | 1.28 | 1.34 | 1.41 | 0.00254228 | 1 |
| P22234 | PAICS    | 21  | 97.3  | 113.5 | 107.4 | 102.7 | 86.5  | 92.6  | 0.95  | 1.31 | 1.16 | 1.14 | 0.14350345 | 1 |
| O75970 | MPDZ     | 7   | 118.3 | 107.6 | 90.7  | 81.7  | 92.4  | 109.3 | 1.45  | 1.16 | 0.83 | 1.15 | 0.38520682 | 1 |
| Q96EY5 | MVB12A   | 5   | 153.2 | 56.4  | 164.1 | 46.8  | 143.6 | 35.9  | 3.27  | 0.39 | 4.57 | 2.75 | 0.36749917 | 1 |
| Q9BQG0 | MYBBP1A  | 13  | 99.6  | 96.4  | 102.5 | 100.4 | 103.6 | 97.5  | 0.99  | 0.93 | 1.05 | 0.99 | 0.70864978 | 1 |
| Q9NUJ1 | ABHD10   | 9   | 109.7 | 82.4  | 109.5 | 90.3  | 117.6 | 90.5  | 1.21  | 0.70 | 1.21 | 1.04 | 0.93769928 | 1 |
| Q9P2K5 | MYEF2    | 8   | 183.7 | 150.3 | 176.6 | 16.3  | 49.7  | 23.4  | 11.27 | 3.02 | 7.55 | 7.28 | 0.00061434 | 1 |
| Q96S97 | MYADM    | 1   | 78.8  | 54.1  | 72.1  | 121.2 | 145.9 | 127.9 | 0.65  | 0.37 | 0.56 | 0.53 | 0.00371519 | 1 |
| Q9NZM1 | MYOF     | 133 | 105.9 | 98.7  | 105.6 | 94.1  | 101.3 | 94.4  | 1.13  | 0.97 | 1.12 | 1.07 | 0.11035157 | 1 |
| P60660 | MYL6     | 7   | 102.8 | 101.1 | 100.2 | 97.2  | 98.9  | 99.8  | 1.06  | 1.02 | 1.00 | 1.03 | 0.06429379 | 1 |
| O14950 | MYL12B   | 6   | 111.1 | 113.4 | 126.3 | 88.9  | 86.6  | 73.7  | 1.25  | 1.31 | 1.71 | 1.42 | 0.00716701 | 1 |
| P58546 | MTPN     | 3   | 102.1 | 105.8 | 131.6 | 97.9  | 94.2  | 68.4  | 1.04  | 1.12 | 1.92 | 1.36 | 0.11520907 | 1 |
| P20933 | AGA      | 3   | 90.6  | 77.5  | 67.8  | 109.4 | 122.5 | 132.2 | 0.83  | 0.63 | 0.51 | 0.66 | 0.01022914 | 1 |
| O94760 | DDAH1    | 7   | 103.4 | 138.9 | 120.5 | 96.6  | 61.1  | 79.5  | 1.07  | 2.27 | 1.52 | 1.62 | 0.04464614 | 1 |
| O95865 | DDAH2    | 4   | 149.1 | 132.3 | 161.8 | 50.9  | 67.7  | 38.2  | 2.93  | 1.95 | 4.24 | 3.04 | 0.00138771 | 1 |
| Q9UJ70 | NAGK     | 15  | 90.3  | 89.1  | 85.8  | 109.7 | 110.9 | 114.2 | 0.82  | 0.80 | 0.75 | 0.79 | 0.00025965 | 1 |
| Q86SF2 | GALNT7   | 4   | 32.7  | 64    | 34.8  | 167.3 | 136   | 165.2 | 0.20  | 0.47 | 0.21 | 0.29 | 0.0014135  | 1 |
| P15586 | GNS      | 10  | 132.8 | 118.7 | 141.7 | 67.2  | 81.3  | 58.3  | 1.98  | 1.46 | 2.43 | 1.96 | 0.00279069 | 1 |
| O95671 | ASMTL    | 8   | 105   | 150.5 | 142.5 | 95    | 49.5  | 57.5  | 1.11  | 3.04 | 2.48 | 2.21 | 0.03010226 | 1 |

|        |         |    |       |       |       |       |       |       |      |      |      |      |            |   |
|--------|---------|----|-------|-------|-------|-------|-------|-------|------|------|------|------|------------|---|
| Q13423 | NNT     | 6  | 87.6  | 82.4  | 84.8  | 112.4 | 117.6 | 115.2 | 0.78 | 0.70 | 0.74 | 0.74 | 0.00014359 | 1 |
| P15559 | NQO1    | 21 | 31.8  | 64.6  | 28.1  | 168.2 | 135.4 | 171.9 | 0.19 | 0.48 | 0.16 | 0.28 | 0.00204324 | 1 |
| P23368 | ME2     | 17 | 130.3 | 127.1 | 117.5 | 69.7  | 72.9  | 82.5  | 1.87 | 1.74 | 1.42 | 1.68 | 0.00078173 | 1 |
| Q9NXA8 | SIRT5   | 4  | 133.4 | 106.9 | 110.8 | 66.6  | 93.1  | 89.2  | 2.00 | 1.15 | 1.24 | 1.46 | 0.04340936 | 1 |
| Q9BU61 | NDUFAF3 | 2  | 151.4 | 163.6 | 137.7 | 48.6  | 36.4  | 62.3  | 3.12 | 4.49 | 2.21 | 3.27 | 0.00065221 | 1 |
| Q9P032 | NDUFAF4 | 4  | 163.1 | 137.1 | 136.5 | 36.9  | 62.9  | 63.5  | 4.42 | 2.18 | 2.15 | 2.92 | 0.00182553 | 1 |
| Q9UI09 | NDUFA12 | 3  | 9.7   | 77.4  | 99.4  | 190.3 | 122.6 | 100.6 | 0.05 | 0.63 | 0.99 | 0.56 | 0.11848991 | 1 |
| Q16718 | NDUFA5  | 3  | 121.9 | 112.4 | 129.8 | 78.1  | 87.6  | 70.2  | 1.56 | 1.28 | 1.85 | 1.56 | 0.00386518 | 1 |
| Q16795 | NDUFA9  | 18 | 98.8  | 80.6  | 107.7 | 101.2 | 119.4 | 92.3  | 0.98 | 0.68 | 1.17 | 0.94 | 0.48824363 | 1 |
| O43676 | NDUFB3  | 3  | 98.4  | 96.3  | 104.5 | 101.6 | 103.7 | 95.5  | 0.97 | 0.93 | 1.09 | 1.00 | 0.88554698 | 1 |
| O95169 | NDUFB8  | 4  | 103.7 | 88    | 117.7 | 96.3  | 112   | 82.3  | 1.08 | 0.79 | 1.43 | 1.10 | 0.6327105  | 1 |
| O75489 | NDUFS3  | 14 | 116.4 | 98.8  | 113.2 | 83.6  | 101.2 | 86.8  | 1.39 | 0.98 | 1.30 | 1.22 | 0.06869547 | 1 |
| P00387 | CYB5R3  | 17 | 115.5 | 91.5  | 118.5 | 84.5  | 108.5 | 81.5  | 1.37 | 0.84 | 1.45 | 1.22 | 0.2321905  | 1 |
| P28331 | NDUFS1  | 17 | 108.5 | 89    | 103.8 | 91.5  | 111   | 96.2  | 1.19 | 0.80 | 1.08 | 1.02 | 0.92194992 | 1 |
| P41227 | NAA10   | 12 | 114.9 | 105.2 | 116.2 | 85.1  | 94.8  | 83.8  | 1.35 | 1.11 | 1.39 | 1.28 | 0.00786773 | 1 |
| Q9BXJ9 | NAA15   | 15 | 133.1 | 138.3 | 149.1 | 66.9  | 61.7  | 50.9  | 1.99 | 2.24 | 2.93 | 2.39 | 0.00027155 | 1 |
| Q14CX7 | NAA25   | 2  | 166.8 | 117.4 | 123   | 33.2  | 82.6  | 77    | 5.02 | 1.42 | 1.60 | 2.68 | 0.03179956 | 1 |
| Q9GZZ1 | NAA50   | 12 | 125.1 | 114.6 | 120.8 | 74.9  | 85.4  | 79.2  | 1.67 | 1.34 | 1.53 | 1.51 | 0.00072614 | 1 |
| O43847 | NRDC    | 24 | 129.6 | 120   | 136.8 | 70.4  | 80    | 63.2  | 1.84 | 1.50 | 2.16 | 1.84 | 0.00111441 | 1 |
| E9PAV3 | NACA    | 5  | 117.2 | 117.3 | 110.6 | 82.8  | 82.7  | 89.4  | 1.42 | 1.42 | 1.24 | 1.36 | 0.00066066 | 1 |
| Q9Y2A7 | NCKAP1  | 9  | 171.3 | 128.6 | 125.5 | 28.7  | 71.4  | 74.5  | 5.97 | 1.80 | 1.68 | 3.15 | 0.01612497 | 1 |
| Q92692 | NECTIN2 | 8  | 132.8 | 134.7 | 150.7 | 67.2  | 65.3  | 49.3  | 1.98 | 2.06 | 3.06 | 2.37 | 0.00060392 | 1 |
| Q15843 | NEDD8   | 4  | 103.7 | 99.3  | 111.3 | 96.3  | 100.7 | 88.7  | 1.08 | 0.99 | 1.25 | 1.11 | 0.12678575 | 1 |
| Q13564 | NAE1    | 7  | 143.3 | 118.7 | 114.8 | 56.7  | 81.3  | 85.2  | 2.53 | 1.46 | 1.35 | 1.78 | 0.0153724  | 1 |
| P61081 | UBE2M   | 9  | 89.8  | 58.2  | 84.1  | 110.2 | 141.8 | 115.9 | 0.81 | 0.41 | 0.73 | 0.65 | 0.03016355 | 1 |
| O00401 | WASL    | 3  | 117.9 | 103.2 | 169.8 | 82.1  | 96.8  | 30.2  | 1.44 | 1.07 | 5.62 | 2.71 | 0.10120039 | 1 |
| Q9BYT8 | NLN     | 6  | 92.4  | 80.3  | 85.1  | 107.6 | 119.7 | 114.9 | 0.86 | 0.67 | 0.74 | 0.76 | 0.00481797 | 1 |
| Q8IY17 | PNPLA6  | 4  | 147.9 | 125.3 | 115.3 | 52.1  | 74.7  | 84.7  | 2.84 | 1.68 | 1.36 | 1.96 | 0.01238175 | 1 |
| Q14697 | GANAB   | 48 | 123.9 | 115.7 | 124.7 | 76.1  | 84.3  | 75.3  | 1.63 | 1.37 | 1.66 | 1.55 | 0.00045839 | 1 |
| Q8NBF2 | NHLRC2  | 8  | 104.7 | 93.5  | 102.4 | 95.3  | 106.5 | 97.6  | 1.10 | 0.88 | 1.05 | 1.01 | 0.93797383 | 1 |
| O60934 | NBN     | 3  | 139.3 | 137.2 | 151.9 | 60.7  | 62.8  | 48.1  | 2.29 | 2.18 | 3.16 | 2.55 | 0.00019106 | 1 |
| Q92542 | NCSTN   | 7  | 89.3  | 99.2  | 77.7  | 110.7 | 100.8 | 122.3 | 0.81 | 0.98 | 0.64 | 0.81 | 0.06233735 | 1 |
| P40261 | NNMT    | 13 | 21.7  | 44.4  | 26.4  | 178.3 | 155.6 | 173.6 | 0.12 | 0.29 | 0.15 | 0.19 | 0.00014521 | 1 |
| O15118 | NPC1    | 11 | 108.9 | 104.4 | 107.6 | 91.1  | 95.6  | 92.4  | 1.20 | 1.09 | 1.16 | 1.15 | 0.00180755 | 1 |
| Q9Y314 | NOSIP   | 7  | 98.8  | 82.8  | 121   | 101.2 | 117.2 | 79    | 0.98 | 0.71 | 1.53 | 1.07 | 0.91721506 | 1 |
| Q86X76 | NIT1    | 8  | 109.8 | 73.9  | 78.7  | 90.2  | 126.1 | 121.3 | 1.22 | 0.59 | 0.65 | 0.82 | 0.19032819 | 1 |
| Q15233 | NONO    | 21 | 173.8 | 147.6 | 159.6 | 26.2  | 52.4  | 40.4  | 6.63 | 2.82 | 3.95 | 4.47 | 0.00035341 | 1 |
| Q96MG7 | NSMCE3  | 5  | 122.2 | 83.7  | 117.7 | 77.8  | 116.3 | 82.3  | 1.57 | 0.72 | 1.43 | 1.24 | 0.41176141 | 1 |
| Q9UNZ2 | NSFL1C  | 16 | 101.6 | 99.3  | 102.3 | 98.4  | 100.7 | 97.7  | 1.03 | 0.99 | 1.05 | 1.02 | 0.17129864 | 1 |
| Q9BV86 | NTMT1   | 6  | 117.2 | 121.8 | 125.2 | 82.8  | 78.2  | 74.8  | 1.42 | 1.56 | 1.67 | 1.55 | 0.00019867 | 1 |
| P23497 | SP100   | 2  | 102.8 | 97.3  | 78.1  | 97.2  | 102.7 | 121.9 | 1.06 | 0.95 | 0.64 | 0.88 | 0.24180567 | 1 |

|        |         |    |       |       |       |       |       |       |      |      |      |      |            |   |
|--------|---------|----|-------|-------|-------|-------|-------|-------|------|------|------|------|------------|---|
| Q53F19 | NCBP3   | 1  | 125.7 | 116   | 123.5 | 74.3  | 84    | 76.5  | 1.69 | 1.38 | 1.61 | 1.56 | 0.0004707  | 1 |
| O60524 | NEMF    | 4  | 114   | 88.7  | 123.4 | 86    | 111.3 | 76.6  | 1.33 | 0.80 | 1.61 | 1.24 | 0.30075416 | 1 |
| Q7Z417 | NUFIP2  | 3  | 125.1 | 125.6 | 107.9 | 74.9  | 74.4  | 92.1  | 1.67 | 1.69 | 1.17 | 1.51 | 0.00898608 | 1 |
| Q9Y266 | NUDC    | 25 | 144.4 | 160   | 161.8 | 55.6  | 40    | 38.2  | 2.60 | 4.00 | 4.24 | 3.61 | 0.00014354 | 1 |
| Q14980 | NUMA1   | 72 | 122   | 115.7 | 123.2 | 78    | 84.3  | 76.8  | 1.56 | 1.37 | 1.60 | 1.51 | 0.00024759 | 1 |
| O75694 | NUP155  | 16 | 178.9 | 154.8 | 162.7 | 21.1  | 45.2  | 37.3  | 8.48 | 3.42 | 4.36 | 5.42 | 0.00019888 | 1 |
| Q92621 | NUP205  | 8  | 127   | 134.5 | 167.7 | 73    | 65.5  | 32.3  | 1.74 | 2.05 | 5.19 | 3.00 | 0.00821797 | 1 |
| P35658 | NUP214  | 17 | 139.8 | 109.4 | 138.3 | 60.2  | 90.6  | 61.7  | 2.32 | 1.21 | 2.24 | 1.92 | 0.01403709 | 1 |
| Q99567 | NUP88   | 6  | 114.5 | 135.4 | 151.9 | 85.5  | 64.6  | 48.1  | 1.34 | 2.10 | 3.16 | 2.20 | 0.01138081 | 1 |
| Q8N1F7 | NUP93   | 10 | 125.9 | 144.4 | 86.9  | 74.1  | 55.6  | 113.1 | 1.70 | 2.60 | 0.77 | 1.69 | 0.18679419 | 1 |
| Q8TEM1 | NUP210  | 9  | 102.7 | 100.7 | 115.6 | 97.3  | 99.3  | 84.4  | 1.06 | 1.01 | 1.37 | 1.15 | 0.12752637 | 1 |
| Q8TAT6 | NPLOC4  | 23 | 114.1 | 108.9 | 117.5 | 85.9  | 91.1  | 82.5  | 1.33 | 1.20 | 1.42 | 1.32 | 0.00158078 | 1 |
| P61970 | NUTF2   | 2  | 98.5  | 89    | 92.4  | 101.5 | 111   | 107.6 | 0.97 | 0.80 | 0.86 | 0.88 | 0.02704047 | 1 |
| Q02818 | NUCB1   | 12 | 84    | 66.7  | 84.1  | 116   | 133.3 | 115.9 | 0.72 | 0.50 | 0.73 | 0.65 | 0.00602811 | 1 |
| Q9BZE4 | GTPBP4  | 5  | 126.9 | 129.8 | 121.3 | 73.1  | 70.2  | 78.7  | 1.74 | 1.85 | 1.54 | 1.71 | 0.00012332 | 1 |
| Q9Y2X3 | NOP58   | 5  | 142.2 | 127.2 | 141.4 | 57.8  | 72.8  | 58.6  | 2.46 | 1.75 | 2.41 | 2.21 | 0.00042906 | 1 |
| P19338 | NCL     | 43 | 112.4 | 107.7 | 113.4 | 87.6  | 92.3  | 86.6  | 1.28 | 1.17 | 1.31 | 1.25 | 0.00084853 | 1 |
| P06748 | NPM1    | 16 | 114.7 | 125.9 | 116.9 | 85.3  | 74.1  | 83.1  | 1.34 | 1.70 | 1.41 | 1.48 | 0.00138096 | 1 |
| Q8NFB4 | NUP37   | 6  | 151.1 | 153.5 | 92.6  | 48.9  | 46.5  | 107.4 | 3.09 | 3.30 | 0.86 | 2.42 | 0.08283469 | 1 |
| Q8NFB5 | NUP35   | 10 | 124.1 | 51    | 119.2 | 75.9  | 149   | 80.8  | 1.64 | 0.34 | 1.48 | 1.15 | 0.91481057 | 1 |
| Q96EE3 | SEH1L   | 9  | 131   | 162.5 | 130.7 | 69    | 37.5  | 69.3  | 1.90 | 4.33 | 1.89 | 2.71 | 0.00515871 | 1 |
| Q13232 | NME3    | 6  | 77.5  | 63.2  | 80.1  | 122.5 | 136.8 | 119.9 | 0.63 | 0.46 | 0.67 | 0.59 | 0.00207173 | 1 |
| P15531 | NME1    | 5  | 100.9 | 99.6  | 90.7  | 99.1  | 100.4 | 109.3 | 1.02 | 0.99 | 0.83 | 0.95 | 0.26526388 | 1 |
| P22392 | NME2    | 9  | 107   | 101   | 115.1 | 93    | 99    | 84.9  | 1.15 | 1.02 | 1.36 | 1.18 | 0.05606849 | 1 |
| P55209 | NAPIL1  | 15 | 108.8 | 145.6 | 138.2 | 91.2  | 54.4  | 61.8  | 1.19 | 2.68 | 2.24 | 2.04 | 0.0177771  | 1 |
| Q96RS6 | NUDCD1  | 9  | 154.8 | 142.9 | 169   | 45.2  | 57.1  | 31    | 3.42 | 2.50 | 5.45 | 3.79 | 0.00047979 | 1 |
| Q8WVJ2 | NUDCD2  | 7  | 146.5 | 148.4 | 133.5 | 53.5  | 51.6  | 66.5  | 2.74 | 2.88 | 2.01 | 2.54 | 0.00020654 | 1 |
| Q9Y530 | OARD1   | 5  | 138.2 | 121   | 133.6 | 61.8  | 79    | 66.4  | 2.24 | 1.53 | 2.01 | 1.93 | 0.00104628 | 1 |
| Q9Y3B8 | REXO2   | 10 | 128.3 | 67.5  | 121.7 | 71.7  | 132.5 | 78.3  | 1.79 | 0.51 | 1.55 | 1.28 | 0.69048646 | 1 |
| Q9NRP0 | OSTC    | 1  | 132   | 123.1 | 132.9 | 68    | 76.9  | 67.1  | 1.94 | 1.60 | 1.98 | 1.84 | 0.0001867  | 1 |
| Q9NQR4 | NIT2    | 21 | 78.2  | 86    | 74.1  | 121.8 | 114   | 125.9 | 0.64 | 0.75 | 0.59 | 0.66 | 0.001133   | 1 |
| Q9NZT2 | OGFR    | 8  | 125.1 | 95.8  | 101.4 | 74.9  | 104.2 | 98.6  | 1.67 | 0.92 | 1.03 | 1.21 | 0.30672942 | 1 |
| Q96CV9 | OPTN    | 5  | 115   | 98.8  | 121.9 | 85    | 101.2 | 78.1  | 1.35 | 0.98 | 1.56 | 1.30 | 0.06982761 | 1 |
| Q53FV1 | ORMDL2  | 1  | 92.7  | 81.3  | 92.2  | 107.3 | 118.7 | 107.8 | 0.86 | 0.68 | 0.86 | 0.80 | 0.01280893 | 1 |
| Q01804 | OTUD4   | 3  | 128.4 | 161.8 | 143.8 | 71.6  | 38.2  | 56.2  | 1.79 | 4.24 | 2.56 | 2.86 | 0.00281705 | 1 |
| Q8N6M0 | OTUD6B  | 8  | 156.2 | 130.8 | 159.7 | 43.8  | 69.2  | 40.3  | 3.57 | 1.89 | 3.96 | 3.14 | 0.00161289 | 1 |
| Q9BUP3 | HTATIP2 | 11 | 22    | 78.7  | 9.4   | 178   | 121.3 | 190.6 | 0.12 | 0.65 | 0.05 | 0.27 | 0.01369245 | 1 |
| P36551 | CPOX    | 16 | 102.1 | 92.2  | 80.4  | 97.9  | 107.8 | 119.6 | 1.04 | 0.86 | 0.67 | 0.86 | 0.13001725 | 1 |
| P22059 | OSBP    | 16 | 115   | 113.1 | 121.4 | 85    | 86.9  | 78.6  | 1.35 | 1.30 | 1.54 | 1.40 | 0.00074559 | 1 |
| Q9BXB4 | OSBPL11 | 6  | 133.7 | 124.4 | 158.8 | 66.3  | 75.6  | 41.2  | 2.02 | 1.65 | 3.85 | 2.51 | 0.00583093 | 1 |
| Q9BZF1 | OSBPL8  | 12 | 164.5 | 146.5 | 168.2 | 35.5  | 53.5  | 31.8  | 4.63 | 2.74 | 5.29 | 4.22 | 0.0002281  | 1 |

|        |         |    |       |       |       |       |       |       |      |      |       |      |            |   |
|--------|---------|----|-------|-------|-------|-------|-------|-------|------|------|-------|------|------------|---|
| Q96SU4 | OSBPL9  | 6  | 136.1 | 121.4 | 116.4 | 63.9  | 78.6  | 83.6  | 2.13 | 1.54 | 1.39  | 1.69 | 0.00414855 | 1 |
| Q96ST3 | SIN3A   | 8  | 130.3 | 144.5 | 153.3 | 69.7  | 55.5  | 46.7  | 1.87 | 2.60 | 3.28  | 2.59 | 0.00083929 | 1 |
| Q8WX93 | PALLD   | 16 | 40.4  | 65.8  | 31.5  | 159.6 | 134.2 | 168.5 | 0.25 | 0.49 | 0.19  | 0.31 | 0.0017384  | 1 |
| P50897 | PPT1    | 7  | 161.6 | 126.2 | 139.3 | 38.4  | 73.8  | 60.7  | 4.21 | 1.71 | 2.29  | 2.74 | 0.00439968 | 1 |
| Q9BRP8 | PYM1    | 5  | 102.1 | 43.4  | 39.3  | 97.9  | 156.6 | 160.7 | 1.04 | 0.28 | 0.24  | 0.52 | 0.05538962 | 1 |
| O75475 | PSIP1   | 6  | 168.3 | 152.3 | 142.6 | 31.7  | 47.7  | 57.4  | 5.31 | 3.19 | 2.48  | 3.66 | 0.00050736 | 1 |
| Q96HC4 | PDLIM5  | 16 | 92.8  | 87.5  | 97.6  | 107.2 | 112.5 | 102.4 | 0.87 | 0.78 | 0.95  | 0.87 | 0.02333971 | 1 |
| Q5EBL8 | PDZD11  | 2  | 111.5 | 149.1 | 156.7 | 88.5  | 50.9  | 43.3  | 1.26 | 2.93 | 3.62  | 2.60 | 0.01671623 | 1 |
| Q9UBV8 | PEF1    | 7  | 124.9 | 90.3  | 124.8 | 75.1  | 109.7 | 75.2  | 1.66 | 0.82 | 1.66  | 1.38 | 0.17691155 | 1 |
| Q96EY7 | PTCD3   | 11 | 126.9 | 98.8  | 119.7 | 73.1  | 101.2 | 80.3  | 1.74 | 0.98 | 1.49  | 1.40 | 0.06400375 | 1 |
| P23284 | PIIB    | 19 | 113.8 | 102.7 | 114.8 | 86.2  | 97.3  | 85.2  | 1.32 | 1.06 | 1.35  | 1.24 | 0.019016   | 1 |
| P30405 | PPIF    | 5  | 97.5  | 98.8  | 98.4  | 102.5 | 101.2 | 101.6 | 0.95 | 0.98 | 0.97  | 0.97 | 0.0028912  | 1 |
| P62942 | FKBP1A  | 2  | 97.6  | 80.6  | 88.7  | 102.4 | 119.4 | 111.3 | 0.95 | 0.68 | 0.80  | 0.81 | 0.03358783 | 1 |
| P26885 | FKBP2   | 5  | 91.1  | 102.3 | 104.4 | 108.9 | 97.7  | 95.6  | 0.84 | 1.05 | 1.09  | 0.99 | 0.81401643 | 1 |
| Q00688 | FKBP3   | 16 | 65.5  | 81.9  | 69.5  | 134.5 | 118.1 | 130.5 | 0.49 | 0.69 | 0.53  | 0.57 | 0.00136572 | 1 |
| Q02790 | FKBP4   | 30 | 127.9 | 103.3 | 108.9 | 72.1  | 96.7  | 91.1  | 1.77 | 1.07 | 1.20  | 1.35 | 0.06402868 | 1 |
| Q13526 | PIN1    | 6  | 127.4 | 116.8 | 99    | 72.6  | 83.2  | 101   | 1.75 | 1.40 | 0.98  | 1.38 | 0.06985643 | 1 |
| Q9Y237 | PIN4    | 6  | 154.7 | 149.4 | 134.8 | 45.3  | 50.6  | 65.2  | 3.42 | 2.95 | 2.07  | 2.81 | 0.00038754 | 1 |
| Q9Y3C6 | PPIL1   | 5  | 133.8 | 138.7 | 151.5 | 66.2  | 61.3  | 48.5  | 2.02 | 2.26 | 3.12  | 2.47 | 0.0003776  | 1 |
| Q9H2H8 | PPIL3   | 3  | 114.9 | 148.1 | 133.1 | 85.1  | 51.9  | 66.9  | 1.35 | 2.85 | 1.99  | 2.06 | 0.00917481 | 1 |
| Q8WUA2 | PPIL4   | 5  | 146   | 170.3 | 127.2 | 54    | 29.7  | 72.8  | 2.70 | 5.73 | 1.75  | 3.39 | 0.00560845 | 1 |
| Q96BP3 | PPWD1   | 3  | 100.5 | 143   | 135.4 | 99.5  | 57    | 64.6  | 1.01 | 2.51 | 2.10  | 1.87 | 0.04675262 | 1 |
| Q9Y3E5 | PTRH2   | 5  | 91.5  | 85.8  | 89.4  | 108.5 | 114.2 | 110.6 | 0.84 | 0.75 | 0.81  | 0.80 | 0.00070452 | 1 |
| Q14197 | MRPL58  | 7  | 112.1 | 96.9  | 192.1 | 87.9  | 103.1 | 7.9   | 1.28 | 0.94 | 24.32 | 8.84 | 0.18181888 | 1 |
| Q13610 | PWP1    | 3  | 142.9 | 117.4 | 104.6 | 57.1  | 82.6  | 95.4  | 2.50 | 1.42 | 1.10  | 1.67 | 0.05310861 | 1 |
| Q06830 | PRDX1   | 21 | 89.6  | 85.7  | 88.8  | 110.4 | 114.3 | 111.2 | 0.81 | 0.75 | 0.80  | 0.79 | 0.00014165 | 1 |
| Q13162 | PRDX4   | 14 | 119.7 | 92.7  | 129.1 | 80.3  | 107.3 | 70.9  | 1.49 | 0.86 | 1.82  | 1.39 | 0.1473953  | 1 |
| P30044 | PRDX5   | 10 | 79    | 73.1  | 83.2  | 121   | 126.9 | 116.8 | 0.65 | 0.58 | 0.71  | 0.65 | 0.00048062 | 1 |
| P30041 | PRDX6   | 20 | 103   | 88.5  | 103.5 | 97    | 111.5 | 96.5  | 1.06 | 0.79 | 1.07  | 0.98 | 0.65682523 | 1 |
| Q9NUI1 | DECR2   | 8  | 54.7  | 69.8  | 49.1  | 145.3 | 130.2 | 150.9 | 0.38 | 0.54 | 0.33  | 0.41 | 0.0006479  | 1 |
| Q15067 | ACOX1   | 10 | 59.1  | 44.5  | 128.7 | 140.9 | 155.5 | 71.3  | 0.42 | 0.29 | 1.81  | 0.84 | 0.28658717 | 1 |
| O96011 | PEX11B  | 7  | 8.1   | 60.2  | 48.1  | 191.9 | 139.8 | 151.9 | 0.04 | 0.43 | 0.32  | 0.26 | 0.00533554 | 1 |
| P51659 | HSD17B4 | 28 | 71.8  | 80.1  | 79.9  | 128.2 | 119.9 | 120.1 | 0.56 | 0.67 | 0.67  | 0.63 | 0.00029919 | 1 |
| Q6Y7W6 | GIGYF2  | 22 | 110.9 | 99    | 113.3 | 89.1  | 101   | 86.7  | 1.24 | 0.98 | 1.31  | 1.18 | 0.0686794  | 1 |
| O95571 | ETHE1   | 11 | 122.4 | 67.1  | 140.1 | 77.6  | 132.9 | 59.9  | 1.58 | 0.50 | 2.34  | 1.47 | 0.56012637 | 1 |
| O00541 | PES1    | 6  | 108.2 | 98.8  | 122.6 | 91.8  | 101.2 | 77.4  | 1.18 | 0.98 | 1.58  | 1.25 | 0.11399381 | 1 |
| Q8WW12 | PCNP    | 10 | 123.4 | 98.2  | 131.2 | 76.6  | 101.8 | 68.8  | 1.61 | 0.96 | 1.91  | 1.49 | 0.06679966 | 1 |
| Q7RTV0 | PHF5A   | 3  | 124   | 111   | 98.4  | 76    | 89    | 101.6 | 1.63 | 1.25 | 0.97  | 1.28 | 0.10015618 | 1 |
| Q9NSD9 | FARSB   | 19 | 97.8  | 91.6  | 96.3  | 102.2 | 108.4 | 103.7 | 0.96 | 0.85 | 0.93  | 0.91 | 0.02256524 | 1 |
| Q9H2J4 | PDCL3   | 11 | 151.3 | 120.7 | 150.9 | 48.7  | 79.3  | 49.1  | 3.11 | 1.52 | 3.07  | 2.57 | 0.00463147 | 1 |
| O75167 | PHACTR2 | 1  | 133.1 | 150.3 | 137.9 | 66.9  | 49.7  | 62.1  | 1.99 | 3.02 | 2.22  | 2.41 | 0.00036707 | 1 |



|        |         |     |       |       |       |       |       |       |       |      |      |      |            |   |
|--------|---------|-----|-------|-------|-------|-------|-------|-------|-------|------|------|------|------------|---|
| Q8IZ21 | PHACTR4 | 7   | 172.4 | 144.4 | 175.3 | 27.6  | 55.6  | 24.7  | 6.25  | 2.60 | 7.10 | 5.31 | 0.00077822 | 1 |
| Q96BW9 | TAMM41  | 3   | 131   | 146.1 | 117.8 | 69    | 53.9  | 82.2  | 1.90  | 2.71 | 1.43 | 2.01 | 0.00542748 | 1 |
| P30086 | PEBP1   | 14  | 95    | 84.9  | 94.3  | 105   | 115.1 | 105.7 | 0.90  | 0.74 | 0.89 | 0.84 | 0.0202085  | 1 |
| Q9NTJ5 | SACM1L  | 5   | 136.8 | 84.9  | 122.2 | 63.2  | 115.1 | 77.8  | 2.16  | 0.74 | 1.57 | 1.49 | 0.25152768 | 1 |
| O15357 | INPPL1  | 15  | 114.6 | 116.4 | 99    | 85.4  | 83.6  | 101   | 1.34  | 1.39 | 0.98 | 1.24 | 0.06264482 | 1 |
| Q00169 | PITPNA  | 13  | 80.4  | 90.5  | 60.1  | 119.6 | 109.5 | 139.9 | 0.67  | 0.83 | 0.43 | 0.64 | 0.02198762 | 1 |
| P48739 | PITPNB  | 16  | 137.8 | 116   | 141.8 | 62.2  | 84    | 58.2  | 2.22  | 1.38 | 2.44 | 2.01 | 0.00492368 | 1 |
| Q13492 | PICALM  | 4   | 146.1 | 125.4 | 124   | 53.9  | 74.6  | 76    | 2.71  | 1.68 | 1.63 | 2.01 | 0.00324262 | 1 |
| Q6VY07 | PACS1   | 6   | 111.6 | 111.5 | 122.7 | 88.4  | 88.5  | 77.3  | 1.26  | 1.26 | 1.59 | 1.37 | 0.00437022 | 1 |
| P36871 | PGM1    | 20  | 96.1  | 89.5  | 93.8  | 103.9 | 110.5 | 106.2 | 0.92  | 0.81 | 0.88 | 0.87 | 0.00738193 | 1 |
| P00558 | PGK1    | 33  | 105.5 | 98.2  | 105.3 | 94.5  | 101.8 | 94.7  | 1.12  | 0.96 | 1.11 | 1.06 | 0.15192513 | 1 |
| P18669 | PGAM1   | 23  | 105.3 | 98.4  | 114.8 | 94.7  | 101.6 | 85.2  | 1.11  | 0.97 | 1.35 | 1.14 | 0.14050375 | 1 |
| Q8IV08 | PLD3    | 8   | 135.5 | 151.2 | 144.5 | 64.5  | 48.8  | 55.5  | 2.10  | 3.10 | 2.60 | 2.60 | 0.00016934 | 1 |
| O15162 | PLSCR1  | 4   | 45.1  | 28    | 63.8  | 154.9 | 172   | 136.2 | 0.29  | 0.16 | 0.47 | 0.31 | 0.0017454  | 1 |
| O15305 | PMM2    | 8   | 56.4  | 83    | 46.6  | 143.6 | 117   | 153.4 | 0.39  | 0.71 | 0.30 | 0.47 | 0.00780632 | 1 |
| O60256 | PRPSAP2 | 9   | 118.8 | 117.5 | 105   | 81.2  | 82.5  | 95    | 1.46  | 1.42 | 1.11 | 1.33 | 0.01146271 | 1 |
| O15067 | PFAS    | 46  | 96    | 88.4  | 97.1  | 104   | 111.6 | 102.9 | 0.92  | 0.79 | 0.94 | 0.89 | 0.03326478 | 1 |
| Q9H4Z3 | PCIF1   | 3   | 119.3 | 109.5 | 138.8 | 80.7  | 90.5  | 61.2  | 1.48  | 1.21 | 2.27 | 1.65 | 0.02082454 | 1 |
| P78330 | PSPH    | 6   | 87.1  | 72.8  | 82.4  | 112.9 | 127.2 | 117.6 | 0.77  | 0.57 | 0.70 | 0.68 | 0.00295051 | 1 |
| Q6NYC8 | PPP1R18 | 9   | 185.5 | 176.6 | 157.6 | 14.5  | 23.4  | 42.4  | 12.79 | 7.55 | 3.72 | 8.02 | 0.00022929 | 1 |
| P20020 | ATP2B1  | 15  | 77.3  | 65.3  | 74    | 122.7 | 134.7 | 126   | 0.63  | 0.48 | 0.59 | 0.57 | 0.00039029 | 1 |
| P23634 | ATP2B4  | 6   | 143.3 | 117.2 | 132.8 | 56.7  | 82.8  | 67.2  | 2.53  | 1.42 | 1.98 | 1.97 | 0.00439277 | 1 |
| P13797 | PLS3    | 21  | 93.9  | 89.5  | 95.7  | 106.1 | 110.5 | 104.3 | 0.89  | 0.81 | 0.92 | 0.87 | 0.0058849  | 1 |
| P68402 | PAFAH1B | 7   | 126.3 | 113.1 | 128.7 | 73.7  | 86.9  | 71.3  | 1.71  | 1.30 | 1.81 | 1.61 | 0.00270094 | 1 |
| Q15149 | PLEC    | 139 | 151.4 | 132.7 | 147.3 | 48.6  | 67.3  | 52.7  | 3.12  | 1.97 | 2.80 | 2.63 | 0.00040002 | 1 |
| O15031 | PLXNB2  | 12  | 57.6  | 50.4  | 78.7  | 142.4 | 149.6 | 121.3 | 0.40  | 0.34 | 0.65 | 0.46 | 0.00326409 | 1 |
| P15151 | PVR     | 5   | 115.6 | 84.4  | 123.9 | 84.4  | 115.6 | 76.1  | 1.37  | 0.73 | 1.63 | 1.24 | 0.40182064 | 1 |
| Q9UKK3 | PARP4   | 29  | 89.1  | 88.2  | 93.7  | 110.9 | 111.8 | 106.3 | 0.80  | 0.79 | 0.88 | 0.82 | 0.00130754 | 1 |
| P51003 | PAPOLA  | 7   | 122.8 | 146.1 | 146.9 | 77.2  | 53.9  | 53.1  | 1.59  | 2.71 | 2.77 | 2.36 | 0.0023047  | 1 |
| O95453 | PARN    | 4   | 63.4  | 88    | 102.3 | 136.6 | 112   | 97.7  | 0.46  | 0.79 | 1.05 | 0.77 | 0.12707841 | 1 |
| Q9NX46 | ADPRHL2 | 7   | 37.8  | 118.7 | 154.7 | 162.2 | 81.3  | 45.3  | 0.23  | 1.46 | 3.42 | 1.70 | 0.88599548 | 1 |
| Q15365 | PCBP1   | 10  | 95.8  | 86.6  | 100.5 | 104.2 | 113.4 | 99.5  | 0.92  | 0.76 | 1.01 | 0.90 | 0.11951962 | 1 |
| Q15366 | PCBP2   | 9   | 93.8  | 117.8 | 106.3 | 106.2 | 82.2  | 93.7  | 0.88  | 1.43 | 1.13 | 1.15 | 0.29029482 | 1 |
| Q9H074 | PAIP1   | 7   | 108.3 | 101.5 | 106.6 | 91.7  | 98.5  | 93.4  | 1.18  | 1.03 | 1.14 | 1.12 | 0.0193707  | 1 |
| Q9Y2S7 | POLDIP2 | 17  | 65.5  | 95.5  | 96.6  | 134.5 | 104.5 | 103.4 | 0.49  | 0.91 | 0.93 | 0.78 | 0.12130161 | 1 |
| Q6NZI2 | PTRF    | 11  | 90.3  | 105.7 | 112.6 | 109.7 | 94.3  | 87.4  | 0.82  | 1.12 | 1.29 | 1.08 | 0.57179035 | 1 |
| Q10471 | GALNT2  | 7   | 99    | 81.6  | 57.7  | 101   | 118.4 | 142.3 | 0.98  | 0.69 | 0.41 | 0.69 | 0.07201244 | 1 |
| Q8N4A0 | GALNT4  | 4   | 57.3  | 93.9  | 44.2  | 142.7 | 106.1 | 155.8 | 0.40  | 0.89 | 0.28 | 0.52 | 0.02950181 | 1 |
| Q8TCS8 | PNPT1   | 12  | 118.7 | 102.5 | 107.8 | 81.3  | 97.5  | 92.2  | 1.46  | 1.05 | 1.17 | 1.23 | 0.04561899 | 1 |
| P14859 | POU2F1  | 2   | 122.4 | 116.4 | 48.9  | 77.6  | 83.6  | 151.1 | 1.58  | 1.39 | 0.32 | 1.10 | 0.81774083 | 1 |
| O60831 | PRAF2   | 3   | 126.6 | 133.6 | 137.9 | 73.4  | 66.4  | 62.1  | 1.72  | 2.01 | 2.22 | 1.99 | 0.00014917 | 1 |

|        |         |    |       |       |       |       |       |       |      |      |      |      |            |   |
|--------|---------|----|-------|-------|-------|-------|-------|-------|------|------|------|------|------------|---|
| O75915 | ARL6IP5 | 5  | 100.8 | 81.5  | 99.7  | 99.2  | 118.5 | 100.3 | 1.02 | 0.69 | 0.99 | 0.90 | 0.24662705 | 1 |
| O60925 | PFDN1   | 3  | 140.8 | 90    | 163.9 | 59.2  | 110   | 36.1  | 2.38 | 0.82 | 4.54 | 2.58 | 0.11028081 | 1 |
| Q9UHV9 | PFDN2   | 5  | 137.1 | 127.7 | 158.6 | 62.9  | 72.3  | 41.4  | 2.18 | 1.77 | 3.83 | 2.59 | 0.00313122 | 1 |
| Q99471 | PFDN5   | 7  | 137.1 | 116.5 | 114.5 | 62.9  | 83.5  | 85.5  | 2.18 | 1.40 | 1.34 | 1.64 | 0.01129517 | 1 |
| O15212 | PFDN6   | 5  | 151.1 | 136.1 | 138.8 | 48.9  | 63.9  | 61.2  | 3.09 | 2.13 | 2.27 | 2.50 | 0.00021036 | 1 |
| O94906 | PRPF6   | 13 | 151.6 | 165   | 176.2 | 48.4  | 35    | 23.8  | 3.13 | 4.71 | 7.40 | 5.08 | 0.00021593 | 1 |
| Q9HCS7 | XAB2    | 8  | 142.5 | 142.6 | 96.2  | 57.5  | 57.4  | 103.8 | 2.48 | 2.48 | 0.93 | 1.96 | 0.06816798 | 1 |
| Q9UI14 | RABAC1  | 4  | 122.6 | 108.7 | 103.3 | 77.4  | 91.3  | 96.7  | 1.58 | 1.19 | 1.07 | 1.28 | 0.04699802 | 1 |
| Q2NL82 | TSR1    | 10 | 134.4 | 126.9 | 142.2 | 65.6  | 73.1  | 57.8  | 2.05 | 1.74 | 2.46 | 2.08 | 0.00038191 | 1 |
| Q969E8 | TSR2    | 2  | 154   | 120.5 | 124.4 | 46    | 79.5  | 75.6  | 3.35 | 1.52 | 1.65 | 2.17 | 0.01161904 | 1 |
| P49768 | PSEN1   | 5  | 118.9 | 109.5 | 141.1 | 81.1  | 90.5  | 58.9  | 1.47 | 1.21 | 2.40 | 1.69 | 0.02495961 | 1 |
| Q5JRX3 | PITRM1  | 17 | 99.6  | 85.2  | 100.4 | 100.4 | 114.8 | 99.6  | 0.99 | 0.74 | 1.01 | 0.91 | 0.23062107 | 1 |
| Q96IZ0 | PAWR    | 5  | 60    | 100.6 | 94.9  | 140   | 99.4  | 105.1 | 0.43 | 1.01 | 0.90 | 0.78 | 0.1736717  | 1 |
| Q92841 | DDX17   | 19 | 139.5 | 136.1 | 150.1 | 60.5  | 63.9  | 49.9  | 2.31 | 2.13 | 3.01 | 2.48 | 0.00014868 | 1 |
| O95786 | DDX58   | 15 | 171.2 | 127.8 | 135.2 | 28.8  | 72.2  | 64.8  | 5.94 | 1.77 | 2.09 | 3.27 | 0.00917534 | 1 |
| Q9UNQ2 | DIMT1   | 6  | 104   | 157.7 | 102.4 | 96    | 42.3  | 97.6  | 1.08 | 3.73 | 1.05 | 1.95 | 0.17168946 | 1 |
| P28370 | SMARCA1 | 2  | 140.2 | 120.4 | 135.1 | 59.8  | 79.6  | 64.9  | 2.34 | 1.51 | 2.08 | 1.98 | 0.00160778 | 1 |
| Q8TED1 | GPX8    | 5  | 115.6 | 129.1 | 101.9 | 84.4  | 70.9  | 98.1  | 1.37 | 1.82 | 1.04 | 1.41 | 0.04892732 | 1 |
| Q5W0Z9 | ZDHHC20 | 3  | 84.2  | 87.6  | 97.6  | 115.8 | 112.4 | 102.4 | 0.73 | 0.78 | 0.95 | 0.82 | 0.02302606 | 1 |
| Q9NPF4 | OSGEP   | 6  | 55.3  | 98.5  | 122.1 | 144.7 | 101.5 | 77.9  | 0.38 | 0.97 | 1.57 | 0.97 | 0.59248181 | 1 |
| Q9NWX6 | THG1L   | 6  | 65.5  | 106   | 124.2 | 134.5 | 94    | 75.8  | 0.49 | 1.13 | 1.64 | 1.08 | 0.91261428 | 1 |
| Q8NBJ5 | COLGALT | 12 | 116.1 | 113   | 120.9 | 83.9  | 87    | 79.1  | 1.38 | 1.30 | 1.53 | 1.40 | 0.00050946 | 1 |
| Q02809 | PLOD1   | 15 | 136.8 | 143.2 | 122.5 | 63.2  | 56.8  | 77.5  | 2.16 | 2.52 | 1.58 | 2.09 | 0.00139097 | 1 |
| O60568 | PLOD3   | 15 | 135.5 | 143.2 | 150.6 | 64.5  | 56.8  | 49.4  | 2.10 | 2.52 | 3.05 | 2.56 | 0.00015177 | 1 |
| P07737 | PFN1    | 15 | 87.1  | 80    | 86    | 112.9 | 120   | 114   | 0.77 | 0.67 | 0.75 | 0.73 | 0.00055751 | 1 |
| P35080 | PFN2    | 6  | 125.9 | 116   | 134.1 | 74.1  | 84    | 65.9  | 1.70 | 1.38 | 2.03 | 1.70 | 0.00238152 | 1 |
| Q8WUM4 | PDCD6IP | 40 | 101   | 100.2 | 108.7 | 99    | 99.8  | 91.3  | 1.02 | 1.00 | 1.19 | 1.07 | 0.16013816 | 1 |
| Q9BUL8 | PDCD10  | 5  | 100.5 | 95.5  | 107.6 | 99.5  | 104.5 | 92.4  | 1.01 | 0.91 | 1.16 | 1.03 | 0.65406248 | 1 |
| O75340 | PDCD6   | 7  | 110.5 | 98.6  | 177.3 | 89.5  | 101.4 | 22.7  | 1.23 | 0.97 | 7.81 | 3.34 | 0.17165463 | 1 |
| P35232 | PHB     | 19 | 133.8 | 148.5 | 128.5 | 66.2  | 51.5  | 71.5  | 2.02 | 2.88 | 1.80 | 2.23 | 0.00094805 | 1 |
| Q99623 | PHB2    | 18 | 123.7 | 160.4 | 126.6 | 76.3  | 39.6  | 73.4  | 1.62 | 4.05 | 1.72 | 2.47 | 0.01142199 | 1 |
| P12004 | PCNA    | 18 | 76.4  | 96.4  | 80.8  | 123.6 | 103.6 | 119.2 | 0.62 | 0.93 | 0.68 | 0.74 | 0.02266084 | 1 |
| O94903 | PROSC   | 11 | 95.5  | 87.1  | 93.8  | 104.5 | 112.9 | 106.2 | 0.91 | 0.77 | 0.88 | 0.86 | 0.01226387 | 1 |
| Q07954 | LRP1    | 11 | 80.3  | 61.4  | 65.8  | 119.7 | 138.6 | 134.2 | 0.67 | 0.44 | 0.49 | 0.53 | 0.00157904 | 1 |
| Q32P28 | P3H1    | 7  | 136.8 | 139.6 | 153.6 | 63.2  | 60.4  | 46.4  | 2.16 | 2.31 | 3.31 | 2.60 | 0.00029589 | 1 |
| P13674 | P4HA1   | 11 | 120.2 | 106.1 | 122.7 | 79.8  | 93.9  | 77.3  | 1.51 | 1.13 | 1.59 | 1.41 | 0.01107313 | 1 |
| O15460 | P4HA2   | 9  | 68.6  | 62.2  | 82    | 131.4 | 137.8 | 118   | 0.52 | 0.45 | 0.69 | 0.56 | 0.00213841 | 1 |
| P48147 | PREP    | 22 | 139.6 | 125.4 | 136.9 | 60.4  | 74.6  | 63.1  | 2.31 | 1.68 | 2.17 | 2.05 | 0.00038361 | 1 |
| Q9H7Z7 | PTGES2  | 15 | 96.2  | 104.9 | 100.4 | 103.8 | 95.1  | 99.6  | 0.93 | 1.10 | 1.01 | 1.01 | 0.79229317 | 1 |
| Q14914 | PTGR1   | 23 | 27.1  | 52.5  | 32.6  | 172.9 | 147.5 | 167.4 | 0.16 | 0.36 | 0.19 | 0.24 | 0.00032923 | 1 |
| Q9UL46 | PSME2   | 12 | 74    | 83.1  | 76.4  | 126   | 116.9 | 123.6 | 0.59 | 0.71 | 0.62 | 0.64 | 0.00032502 | 1 |

|        |         |     |       |       |       |       |       |       |      |      |      |      |            |   |
|--------|---------|-----|-------|-------|-------|-------|-------|-------|------|------|------|------|------------|---|
| P61289 | PSME3   | 13  | 76.5  | 89.4  | 85.5  | 123.5 | 110.6 | 114.5 | 0.62 | 0.81 | 0.75 | 0.72 | 0.00388742 | 1 |
| Q14997 | PSME4   | 9   | 115.4 | 104.4 | 125.6 | 84.6  | 95.6  | 74.4  | 1.36 | 1.09 | 1.69 | 1.38 | 0.0249811  | 1 |
| O95456 | PSMG1   | 11  | 174.9 | 123.3 | 167.6 | 25.1  | 76.7  | 32.4  | 6.97 | 1.61 | 5.17 | 4.58 | 0.0083511  | 1 |
| Q969U7 | PSMG2   | 7   | 151   | 115.1 | 148.1 | 49    | 84.9  | 51.9  | 3.08 | 1.36 | 2.85 | 2.43 | 0.00947843 | 1 |
| Q5JS54 | PSMG4   | 3   | 171.2 | 139.9 | 170.4 | 28.8  | 60.1  | 29.6  | 5.94 | 2.33 | 5.76 | 4.68 | 0.00114815 | 1 |
| Q92530 | PSMF1   | 7   | 80.4  | 90.2  | 124   | 119.6 | 109.8 | 76    | 0.67 | 0.82 | 1.63 | 1.04 | 0.85654456 | 1 |
| P25786 | PSMA1   | 25  | 106.4 | 97.4  | 107.4 | 93.6  | 102.6 | 92.6  | 1.14 | 0.95 | 1.16 | 1.08 | 0.17217146 | 1 |
| P25787 | PSMA2   | 13  | 112.5 | 99.5  | 111.6 | 87.5  | 100.5 | 88.4  | 1.29 | 0.99 | 1.26 | 1.18 | 0.05672757 | 1 |
| P25788 | PSMA3   | 16  | 104.5 | 97.1  | 111.3 | 95.5  | 102.9 | 88.7  | 1.09 | 0.94 | 1.25 | 1.10 | 0.2122076  | 1 |
| P25789 | PSMA4   | 15  | 106.4 | 100.9 | 115.1 | 93.6  | 99.1  | 84.9  | 1.14 | 1.02 | 1.36 | 1.17 | 0.06300684 | 1 |
| P28066 | PSMA5   | 9   | 112.4 | 99.4  | 108.7 | 87.6  | 100.6 | 91.3  | 1.28 | 0.99 | 1.19 | 1.15 | 0.0668395  | 1 |
| P60900 | PSMA6   | 19  | 101.8 | 97    | 104.3 | 98.2  | 103   | 95.7  | 1.04 | 0.94 | 1.09 | 1.02 | 0.5325317  | 1 |
| O14818 | PSMA7   | 16  | 108.2 | 99.9  | 104.5 | 91.8  | 100.1 | 95.5  | 1.18 | 1.00 | 1.09 | 1.09 | 0.06863979 | 1 |
| P49721 | PSMB2   | 16  | 116.2 | 105.5 | 106.3 | 83.8  | 94.5  | 93.7  | 1.39 | 1.12 | 1.13 | 1.21 | 0.018526   | 1 |
| P49720 | PSMB3   | 12  | 109.9 | 99.8  | 101.9 | 90.1  | 100.2 | 98.1  | 1.22 | 1.00 | 1.04 | 1.08 | 0.15017973 | 1 |
| P28070 | PSMB4   | 9   | 116.1 | 134.3 | 85.6  | 83.9  | 65.7  | 114.4 | 1.38 | 2.04 | 0.75 | 1.39 | 0.29826682 | 1 |
| P28074 | PSMB5   | 17  | 115   | 117.1 | 110.1 | 85    | 82.9  | 89.9  | 1.35 | 1.41 | 1.22 | 1.33 | 0.00066017 | 1 |
| P28072 | PSMB6   | 8   | 114.2 | 108.4 | 115.4 | 85.8  | 91.6  | 84.6  | 1.33 | 1.18 | 1.36 | 1.29 | 0.00115683 | 1 |
| Q99436 | PSMB7   | 8   | 117.1 | 100.9 | 115.3 | 82.9  | 99.1  | 84.7  | 1.41 | 1.02 | 1.36 | 1.26 | 0.03757986 | 1 |
| P28065 | PSMB9   | 5   | 88    | 111   | 85.3  | 112   | 89    | 114.7 | 0.79 | 1.25 | 0.74 | 0.93 | 0.41539612 | 1 |
| Q8NFV4 | ABHD11  | 6   | 112   | 129.5 | 116.4 | 88    | 70.5  | 83.6  | 1.27 | 1.84 | 1.39 | 1.50 | 0.00654668 | 1 |
| Q8IVF2 | AHNAK2  | 177 | 112.8 | 106.7 | 114.1 | 87.2  | 93.3  | 85.9  | 1.29 | 1.14 | 1.33 | 1.26 | 0.00225943 | 1 |
| Q99873 | PRMT1   | 12  | 62.9  | 79.1  | 84.3  | 137.1 | 120.9 | 115.7 | 0.46 | 0.65 | 0.73 | 0.61 | 0.00572455 | 1 |
| O60678 | PRMT3   | 3   | 56.8  | 84.2  | 60.6  | 143.2 | 115.8 | 139.4 | 0.40 | 0.73 | 0.43 | 0.52 | 0.00564576 | 1 |
| O14744 | PRMT5   | 17  | 122.4 | 115.7 | 117.3 | 77.6  | 84.3  | 82.7  | 1.58 | 1.37 | 1.42 | 1.46 | 0.00020652 | 1 |
| Q9Y2B0 | CNPY2   | 7   | 128.6 | 118   | 114   | 71.4  | 82    | 86    | 1.80 | 1.44 | 1.33 | 1.52 | 0.00279568 | 1 |
| Q9BT09 | CNPY3   | 3   | 161.6 | 134.6 | 139.9 | 38.4  | 65.4  | 60.1  | 4.21 | 2.06 | 2.33 | 2.86 | 0.00148067 | 1 |
| Q9UKY7 | CDV3    | 6   | 155   | 144.8 | 169.7 | 45    | 55.2  | 30.3  | 3.44 | 2.62 | 5.60 | 3.89 | 0.00038055 | 1 |
| Q9P003 | CNIH4   | 1   | 97.2  | 87.9  | 99.6  | 102.8 | 112.1 | 100.4 | 0.95 | 0.78 | 0.99 | 0.91 | 0.11330563 | 1 |
| P30101 | PDIA3   | 43  | 136.7 | 124.6 | 131.2 | 63.3  | 75.4  | 68.8  | 2.16 | 1.65 | 1.91 | 1.91 | 0.00023811 | 1 |
| P13667 | PDIA4   | 52  | 105.2 | 98.1  | 105.2 | 94.8  | 101.9 | 94.8  | 1.11 | 0.96 | 1.11 | 1.06 | 0.1656949  | 1 |
| Q15084 | PDIA6   | 19  | 96    | 107.1 | 110.2 | 104   | 92.9  | 89.8  | 0.92 | 1.15 | 1.23 | 1.10 | 0.21949569 | 1 |
| Q96JJ7 | TMX3    | 5   | 149.7 | 138.5 | 170.8 | 50.3  | 61.5  | 29.2  | 2.98 | 2.25 | 5.85 | 3.69 | 0.00137837 | 1 |
| Q99497 | PARK7   | 18  | 135.4 | 117.4 | 135.3 | 64.6  | 82.6  | 64.7  | 2.10 | 1.42 | 2.09 | 1.87 | 0.00226276 | 1 |
| Q86VR2 | FAM134C | 2   | 56.1  | 89.2  | 82.5  | 143.9 | 110.8 | 117.5 | 0.39 | 0.81 | 0.70 | 0.63 | 0.02807833 | 1 |
| Q96A26 | FAM162A | 7   | 129.7 | 119.9 | 125.2 | 70.3  | 80.1  | 74.8  | 1.84 | 1.50 | 1.67 | 1.67 | 0.00023933 | 1 |
| Q9GZU8 | FAM192A | 1   | 72.1  | 100.3 | 71.1  | 127.9 | 99.7  | 128.9 | 0.56 | 1.01 | 0.55 | 0.71 | 0.04967547 | 1 |
| Q96ND0 | FAM210A | 2   | 147.2 | 125.3 | 125.2 | 52.8  | 74.7  | 74.8  | 2.79 | 1.68 | 1.67 | 2.05 | 0.0032547  | 1 |
| Q92520 | FAM3C   | 11  | 156.6 | 162.9 | 135.4 | 43.4  | 37.1  | 64.6  | 3.61 | 4.39 | 2.10 | 3.37 | 0.00092846 | 1 |
| Q9NUQ9 | FAM49B  | 17  | 88.9  | 91    | 96.6  | 111.1 | 109   | 103.4 | 0.80 | 0.83 | 0.93 | 0.86 | 0.00851945 | 1 |
| Q14320 | FAM50A  | 4   | 108.7 | 95.5  | 145.7 | 91.3  | 104.5 | 54.3  | 1.19 | 0.91 | 2.68 | 1.60 | 0.19248942 | 1 |

|        |          |    |       |       |       |       |       |       |      |      |      |      |            |   |
|--------|----------|----|-------|-------|-------|-------|-------|-------|------|------|------|------|------------|---|
| Q658Y4 | FAM91A1  | 2  | 142.6 | 94.8  | 143.9 | 57.4  | 105.2 | 56.1  | 2.48 | 0.90 | 2.57 | 1.98 | 0.07661738 | 1 |
| Q13045 | FLII     | 24 | 111.2 | 105.2 | 112.2 | 88.8  | 94.8  | 87.8  | 1.25 | 1.11 | 1.28 | 1.21 | 0.00350793 | 1 |
| O94992 | HEXIM1   | 4  | 87.2  | 80    | 92.3  | 112.8 | 120   | 107.7 | 0.77 | 0.67 | 0.86 | 0.77 | 0.00588171 | 1 |
| Q86VS8 | HOOK3    | 4  | 75.4  | 68.9  | 117.3 | 124.6 | 131.1 | 82.7  | 0.61 | 0.53 | 1.42 | 0.85 | 0.29860363 | 1 |
| P17252 | PRKCA    | 10 | 42.2  | 34.8  | 54.4  | 157.8 | 165.2 | 145.6 | 0.27 | 0.21 | 0.37 | 0.28 | 0.00015495 | 1 |
| Q9UNF0 | PACSIN2  | 10 | 76    | 74.6  | 88.2  | 124   | 125.4 | 111.8 | 0.61 | 0.59 | 0.79 | 0.67 | 0.00261114 | 1 |
| P41743 | PRKCI    | 3  | 127.6 | 119.2 | 136.8 | 72.4  | 80.8  | 63.2  | 1.76 | 1.48 | 2.16 | 1.80 | 0.00149058 | 1 |
| Q8TBQ9 | TMEM167  | 2  | 92.4  | 95.3  | 102.5 | 107.6 | 104.7 | 97.5  | 0.86 | 0.91 | 1.05 | 0.94 | 0.19871006 | 1 |
| Q969X1 | TMBIM1   | 2  | 104   | 93.9  | 103.5 | 96    | 106.1 | 96.5  | 1.08 | 0.89 | 1.07 | 1.01 | 0.85064375 | 1 |
| Q86UE4 | MTDH     | 15 | 114.9 | 95.2  | 129.7 | 85.1  | 104.8 | 70.3  | 1.35 | 0.91 | 1.84 | 1.37 | 0.13365808 | 1 |
| Q7Z3U7 | MON2     | 7  | 126.1 | 96.3  | 118.6 | 73.9  | 103.7 | 81.4  | 1.71 | 0.93 | 1.46 | 1.36 | 0.09692111 | 1 |
| Q9BPW8 | NIPSNAP1 | 10 | 80.7  | 91.3  | 77.3  | 119.3 | 108.7 | 122.7 | 0.68 | 0.84 | 0.63 | 0.72 | 0.00477494 | 1 |
| O75323 | GBAS     | 7  | 52.5  | 98.7  | 50.8  | 147.5 | 101.3 | 149.2 | 0.36 | 0.97 | 0.34 | 0.56 | 0.04221177 | 1 |
| Q9UFN0 | NIPSNAP2 | 9  | 119.2 | 72.5  | 124   | 80.8  | 127.5 | 76    | 1.48 | 0.57 | 1.63 | 1.23 | 0.67562884 | 1 |
| Q8IWE2 | FAM114A  | 10 | 106.2 | 97.6  | 104.2 | 93.8  | 102.4 | 95.8  | 1.13 | 0.95 | 1.09 | 1.06 | 0.22029014 | 1 |
| Q96A00 | PPP1R14A | 2  | 132.9 | 109   | 140   | 67.1  | 91    | 60    | 1.98 | 1.20 | 2.33 | 1.84 | 0.01464317 | 1 |
| Q6ZMI0 | PPP1R21  | 4  | 150.9 | 120.6 | 137.9 | 49.1  | 79.4  | 62.1  | 3.07 | 1.52 | 2.22 | 2.27 | 0.00418996 | 1 |
| Q15435 | PPP1R7   | 7  | 127.2 | 114.3 | 130.5 | 72.8  | 85.7  | 69.5  | 1.75 | 1.33 | 1.88 | 1.65 | 0.00235537 | 1 |
| O15355 | PPM1G    | 15 | 100.3 | 98    | 103.2 | 99.7  | 102   | 96.8  | 1.01 | 0.96 | 1.07 | 1.01 | 0.66282508 | 1 |
| O15258 | RER1     | 4  | 130.6 | 127.1 | 139.6 | 69.4  | 72.9  | 60.4  | 1.88 | 1.74 | 2.31 | 1.98 | 0.00024939 | 1 |
| Q9BY42 | RTFDC1   | 4  | 57.4  | 90.1  | 103.3 | 142.6 | 109.9 | 96.7  | 0.40 | 0.82 | 1.07 | 0.76 | 0.16435363 | 1 |
| P60903 | S100A10  | 3  | 59.8  | 63.6  | 80.3  | 140.2 | 136.4 | 119.7 | 0.43 | 0.47 | 0.67 | 0.52 | 0.00196188 | 1 |
| P31949 | S100A11  | 4  | 77.3  | 67.3  | 79.1  | 122.7 | 132.7 | 120.9 | 0.63 | 0.51 | 0.65 | 0.60 | 0.00060775 | 1 |
| Q96ER3 | SAAL1    | 4  | 129.1 | 120.8 | 129.4 | 70.9  | 79.2  | 70.6  | 1.82 | 1.53 | 1.83 | 1.73 | 0.00018663 | 1 |
| Q9UPN6 | SCAF8    | 7  | 153   | 150.7 | 168.5 | 47    | 49.3  | 31.5  | 3.26 | 3.06 | 5.35 | 3.89 | 0.00013072 | 1 |
| O75880 | SCO1     | 5  | 102.5 | 101.3 | 98.3  | 97.5  | 98.7  | 101.7 | 1.05 | 1.03 | 0.97 | 1.01 | 0.47237207 | 1 |
| O43819 | SCO2     | 5  | 93.6  | 120.9 | 152.1 | 106.4 | 79.1  | 47.9  | 0.88 | 1.53 | 3.18 | 1.86 | 0.13676033 | 1 |
| Q14160 | SCRIB    | 23 | 99.3  | 96.7  | 107.2 | 100.7 | 103.3 | 92.8  | 0.99 | 0.94 | 1.16 | 1.03 | 0.65773213 | 1 |
| P55735 | SEC13    | 10 | 109.2 | 102.9 | 105.8 | 90.8  | 97.1  | 94.2  | 1.20 | 1.06 | 1.12 | 1.13 | 0.00977118 | 1 |
| Q9UBV2 | SEL1L    | 7  | 91.7  | 82.4  | 84.3  | 108.3 | 117.6 | 115.7 | 0.85 | 0.70 | 0.73 | 0.76 | 0.00229758 | 1 |
| Q01105 | SET      | 8  | 118.8 | 134.4 | 131.7 | 81.2  | 65.6  | 68.3  | 1.46 | 2.05 | 1.93 | 1.81 | 0.00114297 | 1 |
| Q9Y2Z0 | SUGT1    | 12 | 145.8 | 134   | 135.6 | 54.2  | 66    | 64.4  | 2.69 | 2.03 | 2.11 | 2.28 | 0.00012396 | 1 |
| Q9H0W8 | SMG9     | 15 | 168.1 | 87.8  | 176.5 | 31.9  | 112.2 | 23.5  | 5.27 | 0.78 | 7.51 | 4.52 | 0.09185966 | 1 |
| A3KN83 | SBNO1    | 8  | 138.9 | 109.8 | 114.4 | 61.1  | 90.2  | 85.6  | 2.27 | 1.22 | 1.34 | 1.61 | 0.03011511 | 1 |
| Q92734 | TFG      | 9  | 119.9 | 114.5 | 121   | 80.1  | 85.5  | 79    | 1.50 | 1.34 | 1.53 | 1.46 | 0.00020192 | 1 |
| Q15436 | SEC23A   | 17 | 93.5  | 79.6  | 84.5  | 106.5 | 120.4 | 115.5 | 0.88 | 0.66 | 0.73 | 0.76 | 0.00798347 | 1 |
| Q15437 | SEC23B   | 11 | 161.7 | 145.4 | 128.4 | 38.3  | 54.6  | 71.6  | 4.22 | 2.66 | 1.79 | 2.89 | 0.00266359 | 1 |
| O95486 | SEC24A   | 8  | 133.7 | 127.8 | 98.3  | 66.3  | 72.2  | 101.7 | 2.02 | 1.77 | 0.97 | 1.58 | 0.0616884  | 1 |
| P53992 | SEC24C   | 14 | 118   | 106.9 | 112.6 | 82    | 93.1  | 87.4  | 1.44 | 1.15 | 1.29 | 1.29 | 0.00527187 | 1 |
| O94979 | SEC31A   | 33 | 129.5 | 122.4 | 131.9 | 70.5  | 77.6  | 68.1  | 1.84 | 1.58 | 1.94 | 1.78 | 0.00015751 | 1 |
| P60468 | SEC61B   | 2  | 48.7  | 104   | 96.1  | 151.3 | 96    | 103.9 | 0.32 | 1.08 | 0.92 | 0.78 | 0.23472938 | 1 |

|        |         |    |       |       |       |       |       |       |      |      |      |      |            |   |
|--------|---------|----|-------|-------|-------|-------|-------|-------|------|------|------|------|------------|---|
| Q93096 | PTP4A1  | 2  | 105.5 | 87.1  | 91.5  | 94.5  | 112.9 | 108.5 | 1.12 | 0.77 | 0.84 | 0.91 | 0.24801379 | 1 |
| Q9H3U1 | UNC45A  | 10 | 96.4  | 95.4  | 110.7 | 103.6 | 104.6 | 89.3  | 0.93 | 0.91 | 1.24 | 1.03 | 0.82322842 | 1 |
| Q5BJH7 | YIF1B   | 3  | 142.2 | 172.4 | 152.7 | 57.8  | 27.6  | 47.3  | 2.46 | 6.25 | 3.23 | 3.98 | 0.0008772  | 1 |
| Q969M3 | YIPF5   | 1  | 106.7 | 92.6  | 128.6 | 93.3  | 107.4 | 71.4  | 1.14 | 0.86 | 1.80 | 1.27 | 0.27754407 | 1 |
| P22061 | PCMT1   | 10 | 149.1 | 106.3 | 145.5 | 50.9  | 93.7  | 54.5  | 2.93 | 1.13 | 2.67 | 2.24 | 0.02557602 | 1 |
| Q04941 | PLP2    | 2  | 108.8 | 114.5 | 123.5 | 91.2  | 85.5  | 76.5  | 1.19 | 1.34 | 1.61 | 1.38 | 0.00671751 | 1 |
| P06454 | PTMA    | 5  | 89.4  | 79.6  | 87.7  | 110.6 | 120.4 | 112.3 | 0.81 | 0.66 | 0.78 | 0.75 | 0.00250973 | 1 |
| Q96PZ0 | PUS7    | 12 | 102.1 | 110.7 | 107   | 97.9  | 89.3  | 93    | 1.04 | 1.24 | 1.15 | 1.14 | 0.0199897  | 1 |
| Q9UBP9 | GULP1   | 4  | 125.4 | 132.8 | 38.5  | 74.6  | 67.2  | 161.5 | 1.68 | 1.98 | 0.24 | 1.30 | 0.96148415 | 1 |
| Q14671 | PUM1    | 9  | 144.4 | 130   | 155.7 | 55.6  | 70    | 44.3  | 2.60 | 1.86 | 3.51 | 2.66 | 0.00117929 | 1 |
| P00491 | PNP     | 21 | 79.3  | 106.7 | 81.5  | 120.7 | 93.3  | 118.5 | 0.66 | 1.14 | 0.69 | 0.83 | 0.15628281 | 1 |
| Q6P158 | DHX57   | 3  | 68.9  | 81.3  | 76.1  | 131.1 | 118.7 | 123.9 | 0.53 | 0.68 | 0.61 | 0.61 | 0.00064143 | 1 |
| Q5T1J5 | CHCHD2P | 2  | 123.2 | 114   | 127.9 | 76.8  | 86    | 72.1  | 1.60 | 1.33 | 1.77 | 1.57 | 0.00167575 | 1 |
| Q6P1N9 | TATDN1  | 12 | 144.4 | 118.7 | 139.7 | 55.6  | 81.3  | 60.3  | 2.60 | 1.46 | 2.32 | 2.12 | 0.00358078 | 1 |
| Q5SRD1 | TIMM23B | 5  | 88.5  | 103.1 | 82.8  | 111.5 | 96.9  | 117.2 | 0.79 | 1.06 | 0.71 | 0.85 | 0.11659779 | 1 |
| P58557 | YBEY    | 1  | 106.9 | 48.9  | 134.1 | 93.1  | 151.1 | 65.9  | 1.15 | 0.32 | 2.03 | 1.17 | 0.85892901 | 1 |
| Q9Y383 | LUC7L2  | 4  | 166.9 | 141.9 | 145.7 | 33.1  | 58.1  | 54.3  | 5.04 | 2.44 | 2.68 | 3.39 | 0.00072437 | 1 |
| A8MWD9 | SNRPGP1 | 2  | 134.6 | 169.4 | 136.1 | 65.4  | 30.6  | 63.9  | 2.06 | 5.54 | 2.13 | 3.24 | 0.00435456 | 1 |
| O00764 | PDXK    | 14 | 50.9  | 85.5  | 52.8  | 149.1 | 114.5 | 147.2 | 0.34 | 0.75 | 0.36 | 0.48 | 0.00965387 | 1 |
| Q6P996 | PDXDC1  | 8  | 67.8  | 52.5  | 43.7  | 132.2 | 147.5 | 156.3 | 0.51 | 0.36 | 0.28 | 0.38 | 0.00080686 | 1 |
| Q9NVS9 | PNPO    | 7  | 113   | 79.3  | 102.9 | 87    | 120.7 | 97.1  | 1.30 | 0.66 | 1.06 | 1.01 | 0.83183618 | 1 |
| P32322 | PYCR1   | 7  | 105.1 | 125.3 | 101   | 94.9  | 74.7  | 99    | 1.11 | 1.68 | 1.02 | 1.27 | 0.12005238 | 1 |
| Q96C36 | PYCR2   | 8  | 94.8  | 129.4 | 90.1  | 105.2 | 70.6  | 109.9 | 0.90 | 1.83 | 0.82 | 1.18 | 0.61532944 | 1 |
| Q53H96 | PYCR1   | 7  | 50.8  | 117.9 | 54.8  | 149.2 | 82.1  | 145.2 | 0.34 | 1.44 | 0.38 | 0.72 | 0.17235    | 1 |
| P11177 | PDHB    | 21 | 92.4  | 87.4  | 105   | 107.6 | 112.6 | 95    | 0.86 | 0.78 | 1.11 | 0.91 | 0.2430026  | 1 |
| Q8NCN5 | PDPR    | 8  | 123.3 | 109.2 | 131.4 | 76.7  | 90.8  | 68.6  | 1.61 | 1.20 | 1.92 | 1.58 | 0.00970365 | 1 |
| Q08257 | CRYZ    | 20 | 78.5  | 86.5  | 75    | 121.5 | 113.5 | 125   | 0.65 | 0.76 | 0.60 | 0.67 | 0.00114509 | 1 |
| Q53FA7 | TP53I3  | 16 | 33.4  | 82.9  | 30.3  | 166.6 | 117.1 | 169.7 | 0.20 | 0.71 | 0.18 | 0.36 | 0.01322438 | 1 |
| P31150 | GDI1    | 15 | 109.9 | 86.8  | 118.9 | 90.1  | 113.2 | 81.1  | 1.22 | 0.77 | 1.47 | 1.15 | 0.48464985 | 1 |
| P50395 | GDI2    | 28 | 106.5 | 100.5 | 105.5 | 93.5  | 99.5  | 94.5  | 1.14 | 1.01 | 1.12 | 1.09 | 0.03369595 | 1 |
| Q15042 | RAB3GAP | 12 | 129.7 | 120.1 | 129   | 70.3  | 79.9  | 71    | 1.84 | 1.50 | 1.82 | 1.72 | 0.00027448 | 1 |
| Q9H2M9 | RAB3GAP | 10 | 95.2  | 119   | 135.2 | 104.8 | 81    | 64.8  | 0.91 | 1.47 | 2.09 | 1.49 | 0.11549246 | 1 |
| Q3YEC7 | RABL6   | 6  | 100   | 73    | 127.9 | 100   | 127   | 72.1  | 1.00 | 0.57 | 1.77 | 1.12 | 0.97992611 | 1 |
| P35241 | RDX     | 35 | 107.4 | 105.6 | 110   | 92.6  | 94.4  | 90    | 1.16 | 1.12 | 1.22 | 1.17 | 0.00105558 | 1 |
| Q14699 | RFTN1   | 5  | 170.2 | 137.5 | 136.6 | 29.8  | 62.5  | 63.4  | 5.71 | 2.20 | 2.15 | 3.36 | 0.00353686 | 1 |
| Q6IAA8 | LAMTOR1 | 5  | 107.4 | 100.6 | 96.7  | 92.6  | 99.4  | 103.3 | 1.16 | 1.01 | 0.94 | 1.04 | 0.51764431 | 1 |
| Q9UHA4 | LAMTOR2 | 2  | 124.5 | 104.1 | 139   | 75.5  | 95.9  | 61    | 1.65 | 1.09 | 2.28 | 1.67 | 0.03457756 | 1 |
| Q9H6Z4 | RANBP3  | 9  | 129.4 | 127.7 | 143.3 | 70.6  | 72.3  | 56.7  | 1.83 | 1.77 | 2.53 | 2.04 | 0.00066377 | 1 |
| P43487 | RANBP1  | 10 | 142.8 | 118   | 141.5 | 57.2  | 82    | 58.5  | 2.50 | 1.44 | 2.42 | 2.12 | 0.00392037 | 1 |
| Q8TEU7 | RAPGEF6 | 4  | 134.3 | 132   | 148.5 | 65.7  | 68    | 51.5  | 2.04 | 1.94 | 2.88 | 2.29 | 0.00046708 | 1 |
| P20936 | RASA1   | 11 | 166.5 | 128.3 | 155.1 | 33.5  | 71.7  | 44.9  | 4.97 | 1.79 | 3.45 | 3.40 | 0.00335881 | 1 |

|        |          |    |       |       |       |       |       |       |      |      |      |      |            |   |
|--------|----------|----|-------|-------|-------|-------|-------|-------|------|------|------|------|------------|---|
| P46940 | IQGAP1   | 88 | 121.8 | 114.5 | 122.4 | 78.2  | 85.5  | 77.6  | 1.56 | 1.34 | 1.58 | 1.49 | 0.00040258 | 1 |
| Q13576 | IQGAP2   | 10 | 5.6   | 34.4  | 15    | 194.4 | 165.6 | 185   | 0.03 | 0.21 | 0.08 | 0.11 | 0.00016823 | 1 |
| Q15404 | RSU1     | 17 | 89.8  | 110.7 | 85.4  | 110.2 | 89.3  | 114.6 | 0.81 | 1.24 | 0.75 | 0.93 | 0.44236284 | 1 |
| Q70E73 | RAPH1    | 4  | 48.5  | 64.9  | 67.2  | 151.5 | 135.1 | 132.8 | 0.32 | 0.48 | 0.51 | 0.44 | 0.00066876 | 1 |
| P63000 | RAC1     | 8  | 100.8 | 90.7  | 100.8 | 99.2  | 109.3 | 99.2  | 1.02 | 0.83 | 1.02 | 0.95 | 0.34164044 | 1 |
| Q7L523 | RRAGA    | 10 | 137.8 | 110   | 84.9  | 62.2  | 90    | 115.1 | 2.22 | 1.22 | 0.74 | 1.39 | 0.37005757 | 1 |
| P61026 | RAB10    | 14 | 72.8  | 57.9  | 72.7  | 127.2 | 142.1 | 127.3 | 0.57 | 0.41 | 0.57 | 0.52 | 0.00077564 | 1 |
| P62491 | RAB11A   | 2  | 100.5 | 86.1  | 93.4  | 99.5  | 113.9 | 106.6 | 1.01 | 0.76 | 0.88 | 0.88 | 0.08591981 | 1 |
| Q6IQ22 | RAB12    | 4  | 140.2 | 88.9  | 157   | 59.8  | 111.1 | 43    | 2.34 | 0.80 | 3.65 | 2.27 | 0.11858469 | 1 |
| P51153 | RAB13    | 6  | 86.5  | 82    | 90.2  | 113.5 | 118   | 109.8 | 0.76 | 0.69 | 0.82 | 0.76 | 0.00119856 | 1 |
| P61106 | RAB14    | 21 | 103.4 | 96.9  | 105.2 | 96.6  | 103.1 | 94.8  | 1.07 | 0.94 | 1.11 | 1.04 | 0.3618257  | 1 |
| Q9NP72 | RAB18    | 9  | 97.9  | 107.2 | 104.4 | 102.1 | 92.8  | 95.6  | 0.96 | 1.16 | 1.09 | 1.07 | 0.17932443 | 1 |
| P62820 | RAB1A    | 8  | 90.5  | 95.4  | 90.7  | 109.5 | 104.6 | 109.3 | 0.83 | 0.91 | 0.83 | 0.86 | 0.0023263  | 1 |
| Q9H0U4 | RAB1B    | 8  | 112.6 | 110.6 | 116.7 | 87.4  | 89.4  | 83.3  | 1.29 | 1.24 | 1.40 | 1.31 | 0.00046921 | 1 |
| Q9UL25 | RAB21    | 11 | 130.9 | 135.4 | 123.9 | 69.1  | 64.6  | 76.1  | 1.89 | 2.10 | 1.63 | 1.87 | 0.00022082 | 1 |
| P61019 | RAB2A    | 9  | 138.7 | 129.4 | 144.3 | 61.3  | 70.6  | 55.7  | 2.26 | 1.83 | 2.59 | 2.23 | 0.00025962 | 1 |
| Q13637 | RAB32    | 9  | 112.4 | 90.6  | 129.9 | 87.6  | 109.4 | 70.1  | 1.28 | 0.83 | 1.85 | 1.32 | 0.2441784  | 1 |
| Q9BZG1 | RAB34    | 6  | 44.9  | 57.4  | 61    | 155.1 | 142.6 | 139   | 0.29 | 0.40 | 0.44 | 0.38 | 0.00018979 | 1 |
| P20337 | RAB3B    | 5  | 153.1 | 159.4 | 100.2 | 46.9  | 40.6  | 99.8  | 3.26 | 3.93 | 1.00 | 2.73 | 0.04733597 | 1 |
| P20339 | RAB5A    | 7  | 104.9 | 105   | 95.1  | 95.1  | 95    | 104.9 | 1.10 | 1.11 | 0.91 | 1.04 | 0.5125432  | 1 |
| P51148 | RAB5C    | 8  | 79    | 42.3  | 76.5  | 121   | 157.7 | 123.5 | 0.65 | 0.27 | 0.62 | 0.51 | 0.01522919 | 1 |
| P20340 | RAB6A    | 7  | 104.8 | 81.2  | 109.6 | 95.2  | 118.8 | 90.4  | 1.10 | 0.68 | 1.21 | 1.00 | 0.8247873  | 1 |
| Q9H0N0 | RAB6C    | 1  | 106.1 | 130.6 | 99.3  | 93.9  | 69.4  | 100.7 | 1.13 | 1.88 | 0.99 | 1.33 | 0.14873642 | 1 |
| P61006 | RAB8A    | 6  | 119.2 | 104.4 | 121.9 | 80.8  | 95.6  | 78.1  | 1.48 | 1.09 | 1.56 | 1.38 | 0.01691424 | 1 |
| Q92930 | RAB8B    | 5  | 79    | 25.1  | 79.2  | 121   | 174.9 | 120.8 | 0.65 | 0.14 | 0.66 | 0.48 | 0.0377964  | 1 |
| P11233 | RALA     | 4  | 113.8 | 106.7 | 117.1 | 86.2  | 93.3  | 82.9  | 1.32 | 1.14 | 1.41 | 1.29 | 0.00445941 | 1 |
| P11234 | RALB     | 7  | 111.5 | 111.7 | 102.2 | 88.5  | 88.3  | 97.8  | 1.26 | 1.27 | 1.04 | 1.19 | 0.01876643 | 1 |
| P61224 | RAP1B    | 4  | 123.3 | 114.6 | 125.5 | 76.7  | 85.4  | 74.5  | 1.61 | 1.34 | 1.68 | 1.54 | 0.00085073 | 1 |
| P61225 | RAP2B    | 5  | 127.2 | 119.4 | 125.6 | 72.8  | 80.6  | 74.4  | 1.75 | 1.48 | 1.69 | 1.64 | 0.00013858 | 1 |
| P62070 | RRAS2    | 5  | 86.5  | 97.2  | 90.5  | 113.5 | 102.8 | 109.5 | 0.76 | 0.95 | 0.83 | 0.84 | 0.0175955  | 1 |
| Q00765 | REEP5    | 8  | 95.7  | 88.3  | 96.1  | 104.3 | 111.7 | 103.9 | 0.92 | 0.79 | 0.92 | 0.88 | 0.02085065 | 1 |
| P63244 | RACK1    | 26 | 91.2  | 118.1 | 101.9 | 108.8 | 81.9  | 98.1  | 0.84 | 1.44 | 1.04 | 1.11 | 0.53655624 | 1 |
| O00559 | EBAG9    | 2  | 116.9 | 47.3  | 95.3  | 83.1  | 152.7 | 104.7 | 1.41 | 0.31 | 0.91 | 0.88 | 0.40582667 | 1 |
| Q9NQG5 | RPRD1B   | 11 | 130.5 | 100.7 | 130   | 69.5  | 99.3  | 70    | 1.88 | 1.01 | 1.86 | 1.58 | 0.04287301 | 1 |
| Q5VT52 | RPRD2    | 12 | 105.6 | 110.8 | 134.9 | 94.4  | 89.2  | 65.1  | 1.12 | 1.24 | 2.07 | 1.48 | 0.0552657  | 1 |
| O43665 | RGS10    | 7  | 142.8 | 147.5 | 130.8 | 57.2  | 52.5  | 69.2  | 2.50 | 2.81 | 1.89 | 2.40 | 0.00032846 | 1 |
| Q96DB5 | RMDN1    | 10 | 165.5 | 95.1  | 180.3 | 34.5  | 104.9 | 19.7  | 4.80 | 0.91 | 9.15 | 4.95 | 0.06486091 | 1 |
| Q8WUF5 | PPP1R13L | 18 | 54.9  | 60.3  | 41.3  | 145.1 | 139.7 | 158.7 | 0.38 | 0.43 | 0.26 | 0.36 | 0.00027938 | 1 |
| Q96T23 | RSF1     | 4  | 113.8 | 123.3 | 131.4 | 86.2  | 76.7  | 68.6  | 1.32 | 1.61 | 1.92 | 1.61 | 0.00315293 | 1 |
| O75787 | ATP6AP2  | 4  | 118   | 131.1 | 84    | 82    | 68.9  | 116   | 1.44 | 1.90 | 0.72 | 1.36 | 0.32857964 | 1 |
| P35249 | RFC4     | 11 | 158.9 | 126.7 | 139.4 | 41.1  | 73.3  | 60.6  | 3.87 | 1.73 | 2.30 | 2.63 | 0.0032585  | 1 |

|        |          |    |       |       |       |       |       |       |      |       |       |      |            |   |
|--------|----------|----|-------|-------|-------|-------|-------|-------|------|-------|-------|------|------------|---|
| P15927 | RPA2     | 11 | 134.1 | 121.4 | 135.4 | 65.9  | 78.6  | 64.6  | 2.03 | 1.54  | 2.10  | 1.89 | 0.00065934 | 1 |
| O95197 | RTN3     | 3  | 82    | 75.8  | 87.3  | 118   | 124.2 | 112.7 | 0.69 | 0.61  | 0.77  | 0.69 | 0.00146621 | 1 |
| Q9HB40 | SCPEP1   | 3  | 125.1 | 101.1 | 125.7 | 74.9  | 98.9  | 74.3  | 1.67 | 1.02  | 1.69  | 1.46 | 0.03917131 | 1 |
| Q8TC12 | RDH11    | 15 | 120.8 | 106.9 | 119.5 | 79.2  | 93.1  | 80.5  | 1.53 | 1.15  | 1.48  | 1.39 | 0.00738684 | 1 |
| Q8NBN7 | RDH13    | 3  | 84.3  | 13.2  | 61.6  | 115.7 | 186.8 | 138.4 | 0.73 | 0.07  | 0.45  | 0.41 | 0.03392665 | 1 |
| Q9HBH5 | RDH14    | 9  | 88.6  | 85.9  | 82.4  | 111.4 | 114.1 | 117.6 | 0.80 | 0.75  | 0.70  | 0.75 | 0.00034707 | 1 |
| P52565 | ARHGDI A | 10 | 102.7 | 105.5 | 96.6  | 97.3  | 94.5  | 103.4 | 1.06 | 1.12  | 0.93  | 1.04 | 0.43768974 | 1 |
| Q8N392 | ARHGAP1  | 6  | 109.8 | 106.7 | 101.9 | 90.2  | 93.3  | 98.1  | 1.22 | 1.14  | 1.04  | 1.13 | 0.0195299  | 1 |
| Q13017 | ARHGAP5  | 4  | 57.9  | 68.8  | 91.1  | 142.1 | 131.2 | 108.9 | 0.41 | 0.52  | 0.84  | 0.59 | 0.0165948  | 1 |
| Q92888 | ARHGEF1  | 8  | 118.5 | 115   | 69.1  | 81.5  | 85    | 130.9 | 1.45 | 1.35  | 0.53  | 1.11 | 0.94231356 | 1 |
| O15013 | ARHGEF1  | 8  | 100.3 | 94.4  | 137.1 | 99.7  | 105.6 | 62.9  | 1.01 | 0.89  | 2.18  | 1.36 | 0.32460792 | 1 |
| Q9NZN5 | ARHGEF1  | 4  | 117.5 | 121   | 172.6 | 82.5  | 79    | 27.4  | 1.42 | 1.53  | 6.30  | 3.09 | 0.04237556 | 1 |
| Q92974 | ARHGEF2  | 7  | 155.3 | 183.8 | 136.8 | 44.7  | 16.2  | 63.2  | 3.47 | 11.35 | 2.16  | 5.66 | 0.00372988 | 1 |
| Q7L0Q8 | RHOU     | 1  | 102.5 | 99.2  | 104   | 97.5  | 100.8 | 96    | 1.05 | 0.98  | 1.08  | 1.04 | 0.13095187 | 1 |
| O75792 | RNASEH2  | 6  | 126.4 | 109.6 | 109.8 | 73.6  | 90.4  | 90.2  | 1.72 | 1.21  | 1.22  | 1.38 | 0.01786715 | 1 |
| P13489 | RNH1     | 16 | 48.7  | 78.1  | 96.2  | 151.3 | 121.9 | 103.8 | 0.32 | 0.64  | 0.93  | 0.63 | 0.05864252 | 1 |
| O75817 | POP7     | 1  | 114.9 | 43.5  | 138.4 | 85.1  | 156.5 | 61.6  | 1.35 | 0.28  | 2.25  | 1.29 | 0.96037425 | 1 |
| O95707 | POP4     | 5  | 115.4 | 102.1 | 91    | 84.6  | 97.9  | 109   | 1.36 | 1.04  | 0.83  | 1.08 | 0.60033829 | 1 |
| P78346 | RPP30    | 6  | 113.7 | 93.1  | 85.5  | 86.3  | 106.9 | 114.5 | 1.32 | 0.87  | 0.75  | 0.98 | 0.68875396 | 1 |
| P52758 | HRSP12   | 5  | 122.4 | 131.9 | 122.8 | 77.6  | 68.1  | 77.2  | 1.58 | 1.94  | 1.59  | 1.70 | 0.00030353 | 1 |
| Q99575 | POP1     | 13 | 129.9 | 120.1 | 131.8 | 70.1  | 79.9  | 68.2  | 1.85 | 1.50  | 1.93  | 1.76 | 0.00044225 | 1 |
| P23921 | RRM1     | 23 | 88.2  | 85.2  | 93.9  | 111.8 | 114.8 | 106.1 | 0.79 | 0.74  | 0.89  | 0.81 | 0.00378543 | 1 |
| P49247 | RPIA     | 8  | 120.4 | 102.8 | 138   | 79.6  | 97.2  | 62    | 1.51 | 1.06  | 2.23  | 1.60 | 0.04690651 | 1 |
| P60891 | PRPS1    | 10 | 88.6  | 105.7 | 83.8  | 111.4 | 94.3  | 116.2 | 0.80 | 1.12  | 0.72  | 0.88 | 0.19529688 | 1 |
| P11908 | PRPS2    | 5  | 93.1  | 104.4 | 99.5  | 106.9 | 95.6  | 100.5 | 0.87 | 1.09  | 0.99  | 0.98 | 0.68782846 | 1 |
| O76021 | RSL1D1   | 6  | 157.9 | 160.4 | 110.9 | 42.1  | 39.6  | 89.1  | 3.75 | 4.05  | 1.24  | 3.02 | 0.01938452 | 1 |
| P51812 | RPS6KA3  | 10 | 103.9 | 89.1  | 113.9 | 96.1  | 110.9 | 86.1  | 1.08 | 0.80  | 1.32  | 1.07 | 0.67500626 | 1 |
| Q92979 | EMG1     | 11 | 128.3 | 115.3 | 135.5 | 71.7  | 84.7  | 64.5  | 1.79 | 1.36  | 2.10  | 1.75 | 0.00322848 | 1 |
| Q14137 | BOP1     | 4  | 89.5  | 83    | 89.9  | 110.5 | 117   | 110.1 | 0.81 | 0.71  | 0.82  | 0.78 | 0.00137157 | 1 |
| Q9Y3A5 | SBDS     | 16 | 145.2 | 129.9 | 150.5 | 54.8  | 70.1  | 49.5  | 2.65 | 1.85  | 3.04  | 2.51 | 0.00066152 | 1 |
| Q9P2E9 | RRBP1    | 57 | 77.1  | 66.1  | 74.7  | 122.9 | 133.9 | 125.3 | 0.63 | 0.49  | 0.60  | 0.57 | 0.00031666 | 1 |
| Q969S9 | GFM2     | 2  | 117.3 | 103.1 | 123   | 82.7  | 96.9  | 77    | 1.42 | 1.06  | 1.60  | 1.36 | 0.02586937 | 1 |
| P16083 | NQO2     | 10 | 118.7 | 105.6 | 110.1 | 81.3  | 94.4  | 89.9  | 1.46 | 1.12  | 1.22  | 1.27 | 0.01347946 | 1 |
| Q9Y5B0 | CTDP1    | 6  | 141.6 | 125   | 137   | 58.4  | 75    | 63    | 2.42 | 1.67  | 2.17  | 2.09 | 0.00059124 | 1 |
| Q9NP77 | SSU72    | 7  | 137.2 | 112.1 | 170.3 | 62.8  | 87.9  | 29.7  | 2.18 | 1.28  | 5.73  | 3.06 | 0.02869514 | 1 |
| Q8N7H5 | PAF1     | 8  | 132.4 | 121.7 | 133.1 | 67.6  | 78.3  | 66.9  | 1.96 | 1.55  | 1.99  | 1.83 | 0.00036908 | 1 |
| Q6PD62 | CTR9     | 5  | 113.1 | 106.7 | 150.9 | 86.9  | 93.3  | 49.1  | 1.30 | 1.14  | 3.07  | 1.84 | 0.07302532 | 1 |
| Q8IZ73 | RPUSD2   | 2  | 118.2 | 79.3  | 121.7 | 81.8  | 120.7 | 78.3  | 1.44 | 0.66  | 1.55  | 1.22 | 0.54178557 | 1 |
| P98175 | RBM10    | 5  | 159.2 | 135.8 | 176.6 | 40.8  | 64.2  | 23.4  | 3.90 | 2.12  | 7.55  | 4.52 | 0.00238562 | 1 |
| Q5T8P6 | RBM26    | 4  | 139.4 | 134   | 148.2 | 60.6  | 66    | 51.8  | 2.30 | 2.03  | 2.86  | 2.40 | 0.00015745 | 1 |
| Q9P2N5 | RBM27    | 3  | 179.3 | 159.4 | 182.2 | 20.7  | 40.6  | 17.8  | 8.66 | 3.93  | 10.24 | 7.61 | 0.00013039 | 1 |

|        |          |    |       |       |       |       |       |       |       |      |       |      |            |   |
|--------|----------|----|-------|-------|-------|-------|-------|-------|-------|------|-------|------|------------|---|
| Q9BWF3 | RBM4     | 6  | 139.2 | 124.5 | 126.7 | 60.8  | 75.5  | 73.3  | 2.29  | 1.65 | 1.73  | 1.89 | 0.00074091 | 1 |
| Q96DH6 | MSI2     | 3  | 75.5  | 36.5  | 63.4  | 124.5 | 163.5 | 136.6 | 0.61  | 0.22 | 0.46  | 0.43 | 0.00700055 | 1 |
| Q9NRX1 | PNO1     | 10 | 89.3  | 127   | 97.6  | 110.7 | 73    | 102.4 | 0.81  | 1.74 | 0.95  | 1.17 | 0.59736809 | 1 |
| Q9UKM9 | RALY     | 9  | 155.5 | 142.7 | 182.3 | 44.5  | 57.3  | 17.7  | 3.49  | 2.49 | 10.30 | 5.43 | 0.0018792  | 1 |
| P22087 | FBL      | 15 | 127.5 | 138.5 | 111   | 72.5  | 61.5  | 89    | 1.76  | 2.25 | 1.25  | 1.75 | 0.01047956 | 1 |
| Q5JTH9 | RRP12    | 15 | 106.1 | 115.5 | 126.1 | 93.9  | 84.5  | 73.9  | 1.13  | 1.37 | 1.71  | 1.40 | 0.01765537 | 1 |
| Q96T51 | RUFY1    | 9  | 103   | 94.2  | 121.1 | 97    | 105.8 | 78.9  | 1.06  | 0.89 | 1.53  | 1.16 | 0.33720077 | 1 |
| P82979 | SARNP    | 7  | 117.6 | 66.6  | 101.6 | 82.4  | 133.4 | 98.4  | 1.43  | 0.50 | 1.03  | 0.99 | 0.67966477 | 1 |
| P16615 | ATP2A2   | 35 | 90.9  | 82.4  | 86.5  | 109.1 | 117.6 | 113.5 | 0.83  | 0.70 | 0.76  | 0.77 | 0.00151454 | 1 |
| Q14151 | SAFB2    | 6  | 182   | 158.2 | 172.3 | 18    | 41.8  | 27.7  | 10.11 | 3.78 | 6.22  | 6.71 | 0.00013161 | 1 |
| Q8WVM8 | SCFD1    | 12 | 125.4 | 115   | 120.8 | 74.6  | 85    | 79.2  | 1.68  | 1.35 | 1.53  | 1.52 | 0.0006612  | 1 |
| Q9Y6Y8 | SEC23IP  | 17 | 112.6 | 103.4 | 110.2 | 87.4  | 96.6  | 89.8  | 1.29  | 1.07 | 1.23  | 1.20 | 0.01096685 | 1 |
| O15126 | SCAMP1   | 7  | 73.4  | 73.7  | 86.6  | 126.6 | 126.3 | 113.4 | 0.58  | 0.58 | 0.76  | 0.64 | 0.00198929 | 1 |
| O15127 | SCAMP2   | 4  | 99.5  | 91.7  | 108.9 | 100.5 | 108.3 | 91.1  | 0.99  | 0.85 | 1.20  | 1.01 | 0.99288977 | 1 |
| O14828 | SCAMP3   | 7  | 89.8  | 72.3  | 81.8  | 110.2 | 127.7 | 118.2 | 0.81  | 0.57 | 0.69  | 0.69 | 0.00639018 | 1 |
| Q6UXD5 | SEZ6L2   | 3  | 150.1 | 129.5 | 136.9 | 49.9  | 70.5  | 63.1  | 3.01  | 1.84 | 2.17  | 2.34 | 0.00080347 | 1 |
| Q15019 | 2-Sep    | 17 | 156.8 | 126.6 | 121.7 | 43.2  | 73.4  | 78.3  | 3.63  | 1.72 | 1.55  | 2.30 | 0.01070425 | 1 |
| Q9UHD8 | 9-Sep    | 25 | 100.2 | 89.2  | 95.3  | 99.8  | 110.8 | 104.7 | 1.00  | 0.81 | 0.91  | 0.91 | 0.0860262  | 1 |
| Q13501 | SQSTM1   | 10 | 123.2 | 57.7  | 90.6  | 76.8  | 142.3 | 109.4 | 1.60  | 0.41 | 0.83  | 0.95 | 0.5166049  | 1 |
| O43464 | HTRA2    | 5  | 145.2 | 126.9 | 162.9 | 54.8  | 73.1  | 37.1  | 2.65  | 1.74 | 4.39  | 2.93 | 0.00360285 | 1 |
| Q9UQ35 | SRRM2    | 24 | 163   | 149.2 | 170.3 | 37    | 50.8  | 29.7  | 4.41  | 2.94 | 5.73  | 4.36 | 0.00015507 | 1 |
| Q07955 | SRSF1    | 12 | 108.6 | 98.8  | 110.7 | 91.4  | 101.2 | 89.3  | 1.19  | 0.98 | 1.24  | 1.13 | 0.08053965 | 1 |
| Q05519 | SRSF11   | 4  | 144.4 | 125.2 | 157.7 | 55.6  | 74.8  | 42.3  | 2.60  | 1.67 | 3.73  | 2.67 | 0.00313013 | 1 |
| Q01130 | SRSF2    | 4  | 105.2 | 91.2  | 106.7 | 94.8  | 108.8 | 93.3  | 1.11  | 0.84 | 1.14  | 1.03 | 0.7819054  | 1 |
| Q13243 | SRSF5    | 2  | 153.4 | 143   | 183.3 | 46.6  | 57    | 16.7  | 3.29  | 2.51 | 10.98 | 5.59 | 0.00217684 | 1 |
| Q16629 | SRSF7    | 8  | 119.6 | 79.9  | 114.8 | 80.4  | 120.1 | 85.2  | 1.49  | 0.67 | 1.35  | 1.17 | 0.61858529 | 1 |
| O94804 | STK10    | 4  | 89.9  | 167   | 158   | 110.1 | 33    | 42    | 0.82  | 5.06 | 3.76  | 3.21 | 0.09006905 | 1 |
| Q9Y5S2 | CDC42BP1 | 4  | 91.5  | 93.6  | 107.2 | 108.5 | 106.4 | 92.8  | 0.84  | 0.88 | 1.16  | 0.96 | 0.50166223 | 1 |
| Q16512 | PKN1     | 4  | 123.8 | 101.3 | 97.1  | 76.2  | 98.7  | 102.9 | 1.62  | 1.03 | 0.94  | 1.20 | 0.27535238 | 1 |
| Q8TD19 | NEK9     | 5  | 23.4  | 108.4 | 119.1 | 176.6 | 91.6  | 80.9  | 0.13  | 1.18 | 1.47  | 0.93 | 0.48716206 | 1 |
| O96013 | PAK4     | 8  | 125.8 | 132.4 | 136.6 | 74.2  | 67.6  | 63.4  | 1.70  | 1.96 | 2.15  | 1.94 | 0.00014212 | 1 |
| Q96Q15 | SMG1     | 1  | 142.3 | 111.5 | 114   | 57.7  | 88.5  | 86    | 2.47  | 1.26 | 1.33  | 1.68 | 0.03179057 | 1 |
| Q9H4A3 | WNK1     | 29 | 140.6 | 128.2 | 138.8 | 59.4  | 71.8  | 61.2  | 2.37  | 1.79 | 2.27  | 2.14 | 0.00019534 | 1 |
| Q96QC0 | PPP1R10  | 2  | 71.5  | 143.4 | 157.5 | 128.5 | 56.6  | 42.5  | 0.56  | 2.53 | 3.71  | 2.27 | 0.26921552 | 1 |
| Q14738 | PPP2R5D  | 7  | 144.5 | 139.2 | 161.7 | 55.5  | 60.8  | 38.3  | 2.60  | 2.29 | 4.22  | 3.04 | 0.00054227 | 1 |
| P30153 | PPP2R1A  | 22 | 110.1 | 103.1 | 105.5 | 89.9  | 96.9  | 94.5  | 1.22  | 1.06 | 1.12  | 1.14 | 0.0127226  | 1 |
| Q15257 | PPP2R4   | 4  | 132.8 | 162.5 | 122   | 67.2  | 37.5  | 78    | 1.98  | 4.33 | 1.56  | 2.62 | 0.01028586 | 1 |
| P67775 | PPP2CA   | 5  | 109   | 114.2 | 108   | 91    | 85.8  | 92    | 1.20  | 1.33 | 1.17  | 1.23 | 0.00156643 | 1 |
| Q08209 | PPP3CA   | 8  | 88    | 83.7  | 93    | 112   | 116.3 | 107   | 0.79  | 0.72 | 0.87  | 0.79 | 0.00345715 | 1 |
| P60510 | PPP4C    | 6  | 133.9 | 118.8 | 129.2 | 66.1  | 81.2  | 70.8  | 2.03  | 1.46 | 1.82  | 1.77 | 0.00098082 | 1 |
| Q9NY27 | PPP4R2   | 5  | 116.5 | 94.1  | 127.3 | 83.5  | 105.9 | 72.7  | 1.40  | 0.89 | 1.75  | 1.34 | 0.14166099 | 1 |



|        |          |    |       |       |       |       |       |       |       |      |      |      |            |   |
|--------|----------|----|-------|-------|-------|-------|-------|-------|-------|------|------|------|------------|---|
| O00743 | PPP6C    | 8  | 108   | 114.5 | 116.2 | 92    | 85.5  | 83.8  | 1.17  | 1.34 | 1.39 | 1.30 | 0.00187118 | 1 |
| Q5H9R7 | PPP6R3   | 4  | 128.2 | 143.5 | 128   | 71.8  | 56.5  | 72    | 1.79  | 2.54 | 1.78 | 2.03 | 0.00079018 | 1 |
| Q9BRF8 | CPPED1   | 12 | 11.7  | 54.4  | 19.3  | 188.3 | 145.6 | 180.7 | 0.06  | 0.37 | 0.11 | 0.18 | 0.0015363  | 1 |
| P62136 | PPP1CA   | 5  | 127.6 | 104.5 | 122.5 | 72.4  | 95.5  | 77.5  | 1.76  | 1.09 | 1.58 | 1.48 | 0.02132385 | 1 |
| P62140 | PPP1CB   | 7  | 125.4 | 100.8 | 121.4 | 74.6  | 99.2  | 78.6  | 1.68  | 1.02 | 1.54 | 1.41 | 0.04221125 | 1 |
| P49591 | SARS     | 21 | 131.6 | 134.1 | 150.6 | 68.4  | 65.9  | 49.4  | 1.92  | 2.03 | 3.05 | 2.34 | 0.00077611 | 1 |
| P35237 | SERPINB6 | 20 | 144.8 | 124.5 | 154.5 | 55.2  | 75.5  | 45.5  | 2.62  | 1.65 | 3.40 | 2.56 | 0.00272632 | 1 |
| P50454 | SERPINH1 | 16 | 72.1  | 102.8 | 105   | 127.9 | 97.2  | 95    | 0.56  | 1.06 | 1.11 | 0.91 | 0.42266558 | 1 |
| Q9UBL3 | ASH2L    | 1  | 140.1 | 128.1 | 115.6 | 59.9  | 71.9  | 84.4  | 2.34  | 1.78 | 1.37 | 1.83 | 0.00504048 | 1 |
| P10768 | ESD      | 15 | 100.4 | 90    | 100.6 | 99.6  | 110   | 99.4  | 1.01  | 0.82 | 1.01 | 0.95 | 0.29220021 | 1 |
| A1X283 | SH3PXD2I | 3  | 117   | 94    | 74.9  | 83    | 106   | 125.1 | 1.41  | 0.89 | 0.60 | 0.97 | 0.61400448 | 1 |
| Q9H299 | SH3BGRL  | 2  | 168.6 | 90.5  | 172.4 | 31.4  | 109.5 | 27.6  | 5.37  | 0.83 | 6.25 | 4.15 | 0.08090128 | 1 |
| Q96B97 | SH3KBP1  | 16 | 155   | 130.4 | 140.3 | 45    | 69.6  | 59.7  | 3.44  | 1.87 | 2.35 | 2.56 | 0.00115501 | 1 |
| A0MZ66 | SHTN1    | 13 | 78.3  | 75    | 86.5  | 121.7 | 125   | 113.5 | 0.64  | 0.60 | 0.76 | 0.67 | 0.00115017 | 1 |
| O75911 | DHRS3    | 9  | 35.1  | 3.4   | 29.9  | 164.9 | 196.6 | 170.1 | 0.21  | 0.02 | 0.18 | 0.14 | 0.00037172 | 1 |
| Q9NR45 | NANS     | 5  | 145.4 | 127.7 | 162.3 | 54.6  | 72.3  | 37.7  | 2.66  | 1.77 | 4.31 | 2.91 | 0.00307905 | 1 |
| Q9NRA2 | SLC17A5  | 2  | 115.2 | 138.4 | 120.2 | 84.8  | 61.6  | 79.8  | 1.36  | 2.25 | 1.51 | 1.70 | 0.00784387 | 1 |
| Q9H9B4 | SFXN1    | 17 | 85.3  | 93.7  | 89.4  | 114.7 | 106.3 | 110.6 | 0.74  | 0.88 | 0.81 | 0.81 | 0.00356172 | 1 |
| Q9BWM7 | SFXN3    | 13 | 80.3  | 101.7 | 72.9  | 119.7 | 98.3  | 127.1 | 0.67  | 1.03 | 0.57 | 0.76 | 0.06953485 | 1 |
| Q99720 | SIGMAR1  | 4  | 99.5  | 104.4 | 97.1  | 100.5 | 95.6  | 102.9 | 0.99  | 1.09 | 0.94 | 1.01 | 0.83704377 | 1 |
| P67812 | SEC11A   | 5  | 107.1 | 97.1  | 112.6 | 92.9  | 102.9 | 87.4  | 1.15  | 0.94 | 1.29 | 1.13 | 0.15581472 | 1 |
| Q9Y6A9 | SPCS1    | 3  | 108   | 97.3  | 114.8 | 92    | 102.7 | 85.2  | 1.17  | 0.95 | 1.35 | 1.16 | 0.13635719 | 1 |
| P37108 | SRP14    | 7  | 141.2 | 106.1 | 143.9 | 58.8  | 93.9  | 56.1  | 2.40  | 1.13 | 2.57 | 2.03 | 0.0242047  | 1 |
| P09132 | SRP19    | 5  | 105.9 | 84.8  | 108.9 | 94.1  | 115.2 | 91.1  | 1.13  | 0.74 | 1.20 | 1.02 | 0.98135249 | 1 |
| P49458 | SRP9     | 3  | 121   | 65    | 104.3 | 79    | 135   | 95.7  | 1.53  | 0.48 | 1.09 | 1.03 | 0.79659371 | 1 |
| Q9Y5M8 | SRPRB    | 15 | 129.9 | 121.4 | 130.9 | 70.1  | 78.6  | 69.1  | 1.85  | 1.54 | 1.89 | 1.76 | 0.00021099 | 1 |
| Q9UHB9 | SRP68    | 10 | 122.8 | 114.9 | 125   | 77.2  | 85.1  | 75    | 1.59  | 1.35 | 1.67 | 1.54 | 0.00064794 | 1 |
| P40763 | STAT3    | 12 | 56.7  | 55.1  | 104.5 | 143.3 | 144.9 | 95.5  | 0.40  | 0.38 | 1.09 | 0.62 | 0.07162437 | 1 |
| Q92783 | STAM     | 4  | 122.8 | 113.5 | 121.3 | 77.2  | 86.5  | 78.7  | 1.59  | 1.31 | 1.54 | 1.48 | 0.00070817 | 1 |
| Q04837 | SSBP1    | 9  | 90.9  | 95.7  | 100.6 | 109.1 | 104.3 | 99.4  | 0.83  | 0.92 | 1.01 | 0.92 | 0.09745119 | 1 |
| Q29RF7 | PDS5A    | 17 | 165.2 | 29.5  | 165.2 | 34.8  | 170.5 | 34.8  | 4.75  | 0.17 | 4.75 | 3.22 | 0.56629878 | 1 |
| O00193 | SMAP     | 3  | 84.8  | 73.5  | 105   | 115.2 | 126.5 | 95    | 0.74  | 0.58 | 1.11 | 0.81 | 0.13362863 | 1 |
| Q0VAQ4 | SMAGP    | 1  | 186.5 | 120.2 | 75.9  | 13.5  | 79.8  | 124.1 | 13.81 | 1.51 | 0.61 | 5.31 | 0.29233914 | 1 |
| O43765 | SGTA     | 10 | 143.7 | 132.6 | 154.6 | 56.3  | 67.4  | 45.4  | 2.55  | 1.97 | 3.41 | 2.64 | 0.00062821 | 1 |
| Q8N5G0 | SMIM20   | 2  | 140.4 | 63.1  | 116.5 | 59.6  | 136.9 | 83.5  | 2.36  | 0.46 | 1.40 | 1.40 | 0.70104853 | 1 |
| P62318 | SNRPD3   | 3  | 128.7 | 128.5 | 143.4 | 71.3  | 71.5  | 56.6  | 1.81  | 1.80 | 2.53 | 2.05 | 0.00065488 | 1 |
| P14678 | SNRPB    | 1  | 123.7 | 78.3  | 104.7 | 76.3  | 121.7 | 95.3  | 1.62  | 0.64 | 1.10 | 1.12 | 0.82217681 | 1 |
| P61956 | SUMO2    | 3  | 119.4 | 151.8 | 156.9 | 80.6  | 48.2  | 43.1  | 1.48  | 3.15 | 3.64 | 2.76 | 0.00677942 | 1 |
| O95295 | SNAPIN   | 2  | 112.2 | 83.4  | 106.2 | 87.8  | 116.6 | 93.8  | 1.28  | 0.72 | 1.13 | 1.04 | 0.92759813 | 1 |
| Q13573 | SNW1     | 7  | 158.5 | 139.7 | 152.5 | 41.5  | 60.3  | 47.5  | 3.82  | 2.32 | 3.21 | 3.12 | 0.00021381 | 1 |
| Q9Y6M7 | SLC4A7   | 8  | 127.7 | 107.9 | 143.8 | 72.3  | 92.1  | 56.2  | 1.77  | 1.17 | 2.56 | 1.83 | 0.02265081 | 1 |

|        |          |    |       |       |       |       |       |       |      |      |      |      |            |   |
|--------|----------|----|-------|-------|-------|-------|-------|-------|------|------|------|------|------------|---|
| P05023 | ATP1A1   | 33 | 106.2 | 97.9  | 106.9 | 93.8  | 102.1 | 93.1  | 1.13 | 0.96 | 1.15 | 1.08 | 0.14725949 | 1 |
| P54709 | ATP1B3   | 9  | 147.7 | 132.2 | 149   | 52.3  | 67.8  | 51    | 2.82 | 1.95 | 2.92 | 2.57 | 0.00035439 | 1 |
| Q8NBW4 | SLC38A9  | 2  | 116.1 | 84    | 105.7 | 83.9  | 116   | 94.3  | 1.38 | 0.72 | 1.12 | 1.08 | 0.7868363  | 1 |
| P11166 | SLC2A1   | 6  | 82.5  | 76.8  | 83.5  | 117.5 | 123.2 | 116.5 | 0.70 | 0.62 | 0.72 | 0.68 | 0.00020688 | 1 |
| Q96BI1 | SLC22A18 | 1  | 75.9  | 81.2  | 93.9  | 124.1 | 118.8 | 106.1 | 0.61 | 0.68 | 0.89 | 0.73 | 0.01239645 | 1 |
| Q13596 | SNX1     | 7  | 97.2  | 95.8  | 101   | 102.8 | 104.2 | 99    | 0.95 | 0.92 | 1.02 | 0.96 | 0.14276239 | 1 |
| Q9UMY4 | SNX12    | 7  | 108.2 | 108.2 | 137.3 | 91.8  | 91.8  | 62.7  | 1.18 | 1.18 | 2.19 | 1.52 | 0.05943658 | 1 |
| O60749 | SNX2     | 16 | 130.7 | 131.9 | 122.5 | 69.3  | 68.1  | 77.5  | 1.89 | 1.94 | 1.58 | 1.80 | 0.00017014 | 1 |
| O60493 | SNX3     | 9  | 135.6 | 143.2 | 128.3 | 64.4  | 56.8  | 71.7  | 2.11 | 2.52 | 1.79 | 2.14 | 0.00030143 | 1 |
| Q9Y5X3 | SNX5     | 8  | 33.7  | 81.6  | 110.6 | 166.3 | 118.4 | 89.4  | 0.20 | 0.69 | 1.24 | 0.71 | 0.19424875 | 1 |
| Q8N0X7 | SPG20    | 8  | 109.3 | 98.4  | 120.5 | 90.7  | 101.6 | 79.5  | 1.21 | 0.97 | 1.52 | 1.23 | 0.10558428 | 1 |
| Q9NUQ6 | SPATS2L  | 1  | 129.3 | 119.8 | 133.2 | 70.7  | 80.2  | 66.8  | 1.83 | 1.49 | 1.99 | 1.77 | 0.0006199  | 1 |
| Q13813 | SPTAN1   | 66 | 91.6  | 76.5  | 82.7  | 108.4 | 123.5 | 117.3 | 0.85 | 0.62 | 0.71 | 0.72 | 0.00611764 | 1 |
| Q01082 | SPTBN1   | 23 | 102.9 | 94.8  | 99.1  | 97.1  | 105.2 | 100.9 | 1.06 | 0.90 | 0.98 | 0.98 | 0.55421968 | 1 |
| Q96R06 | SPAG5    | 3  | 177.1 | 127.7 | 121.7 | 22.9  | 72.3  | 78.3  | 7.73 | 1.77 | 1.55 | 3.68 | 0.02734222 | 1 |
| P19623 | SRM      | 18 | 95.6  | 101   | 90.6  | 104.4 | 99    | 109.4 | 0.92 | 1.02 | 0.83 | 0.92 | 0.11488509 | 1 |
| P63208 | SKP1     | 10 | 124   | 172.6 | 113.7 | 76    | 27.4  | 86.3  | 1.63 | 6.30 | 1.32 | 3.08 | 0.04579336 | 1 |
| O15121 | DEGS1    | 3  | 117.2 | 102.7 | 100.3 | 82.8  | 97.3  | 99.7  | 1.42 | 1.06 | 1.01 | 1.16 | 0.14558938 | 1 |
| Q13838 | DDX39B   | 14 | 146.2 | 130.6 | 133.2 | 53.8  | 69.4  | 66.8  | 2.72 | 1.88 | 1.99 | 2.20 | 0.00042508 | 1 |
| Q15637 | SF1      | 16 | 115.2 | 115.1 | 120.4 | 84.8  | 84.9  | 79.6  | 1.36 | 1.36 | 1.51 | 1.41 | 0.00016656 | 1 |
| Q15459 | SF3A1    | 33 | 139.5 | 130.6 | 143.5 | 60.5  | 69.4  | 56.5  | 2.31 | 1.88 | 2.54 | 2.24 | 0.00014905 | 1 |
| Q15393 | SF3B3    | 45 | 128.1 | 119.6 | 128.1 | 71.9  | 80.4  | 71.9  | 1.78 | 1.49 | 1.78 | 1.68 | 0.00022756 | 1 |
| Q9Y3B4 | SF3B6    | 4  | 135.7 | 132   | 95.6  | 64.3  | 68    | 104.4 | 2.11 | 1.94 | 0.92 | 1.66 | 0.08005758 | 1 |
| Q01081 | U2AF1    | 5  | 69.6  | 96.3  | 73.5  | 130.4 | 103.7 | 126.5 | 0.53 | 0.93 | 0.58 | 0.68 | 0.0265142  | 1 |
| P26368 | U2AF2    | 8  | 152.6 | 134   | 140.4 | 47.4  | 66    | 59.6  | 3.22 | 2.03 | 2.36 | 2.54 | 0.00039182 | 1 |
| O95104 | SCAF4    | 3  | 152.2 | 147.8 | 169.2 | 47.8  | 52.2  | 30.8  | 3.18 | 2.83 | 5.49 | 3.84 | 0.00025711 | 1 |
| Q8WXA9 | SREK1    | 3  | 119.4 | 138.8 | 136.2 | 80.6  | 61.2  | 63.8  | 1.48 | 2.27 | 2.13 | 1.96 | 0.00185377 | 1 |
| P37268 | FDFT1    | 11 | 165   | 132.6 | 109.2 | 35    | 67.4  | 90.8  | 4.71 | 1.97 | 1.20 | 2.63 | 0.0358008  | 1 |
| Q15020 | SART3    | 18 | 145.9 | 116.9 | 138.4 | 54.1  | 83.1  | 61.6  | 2.70 | 1.41 | 2.25 | 2.12 | 0.00536552 | 1 |
| Q9GZT3 | SLIRP    | 5  | 99.7  | 86.4  | 65.8  | 100.3 | 113.6 | 134.2 | 0.99 | 0.76 | 0.49 | 0.75 | 0.08300132 | 1 |
| Q14247 | CTTN     | 31 | 106.2 | 99.1  | 110.7 | 93.8  | 100.9 | 89.3  | 1.13 | 0.98 | 1.24 | 1.12 | 0.08923577 | 1 |
| Q7KZF4 | SND1     | 47 | 93    | 87.6  | 92.5  | 107   | 112.4 | 107.5 | 0.87 | 0.78 | 0.86 | 0.84 | 0.00181467 | 1 |
| Q9HD15 | SRA1     | 7  | 161.6 | 125.3 | 155.5 | 38.4  | 74.7  | 44.5  | 4.21 | 1.68 | 3.49 | 3.13 | 0.00392639 | 1 |
| Q15738 | NSDHL    | 7  | 121.1 | 133.2 | 88.9  | 78.9  | 66.8  | 111.1 | 1.53 | 1.99 | 0.80 | 1.44 | 0.19829307 | 1 |
| Q9UJZ1 | STOML2   | 18 | 167.2 | 116.9 | 124   | 32.8  | 83.1  | 76    | 5.10 | 1.41 | 1.63 | 2.71 | 0.03160918 | 1 |
| P38646 | HSPA9    | 46 | 127.1 | 118.8 | 124.7 | 72.9  | 81.2  | 75.3  | 1.74 | 1.46 | 1.66 | 1.62 | 0.00017442 | 1 |
| P31948 | STIP1    | 55 | 113.4 | 106.9 | 114.3 | 86.6  | 93.1  | 85.7  | 1.31 | 1.15 | 1.33 | 1.26 | 0.00219603 | 1 |
| P31040 | SDHA     | 23 | 116.6 | 104.8 | 114.5 | 83.4  | 95.2  | 85.5  | 1.40 | 1.10 | 1.34 | 1.28 | 0.0096136  | 1 |
| P21912 | SDHB     | 11 | 130.6 | 105.8 | 129.9 | 69.4  | 94.2  | 70.1  | 1.88 | 1.12 | 1.85 | 1.62 | 0.01855951 | 1 |
| P53597 | SUCLG1   | 12 | 64.3  | 102.9 | 65.3  | 135.7 | 97.1  | 134.7 | 0.47 | 1.06 | 0.48 | 0.67 | 0.06642155 | 1 |
| Q8NBJ7 | SUMF2    | 11 | 123.3 | 91    | 126.5 | 76.7  | 109   | 73.5  | 1.61 | 0.83 | 1.72 | 1.39 | 0.1650492  | 1 |

|        |         |     |       |       |       |       |       |       |      |      |      |      |            |   |
|--------|---------|-----|-------|-------|-------|-------|-------|-------|------|------|------|------|------------|---|
| Q6ZRP7 | QSOX2   | 7   | 99.1  | 71.9  | 102.6 | 100.9 | 128.1 | 97.4  | 0.98 | 0.56 | 1.05 | 0.87 | 0.26890198 | 1 |
| P0DMN0 | SULT1A4 | 17  | 19.8  | 89.3  | 28    | 180.2 | 110.7 | 172   | 0.11 | 0.81 | 0.16 | 0.36 | 0.02485168 | 1 |
| Q9UBE0 | SAE1    | 15  | 116.9 | 100.2 | 117.1 | 83.1  | 99.8  | 82.9  | 1.41 | 1.00 | 1.41 | 1.27 | 0.04506832 | 1 |
| Q9UBT2 | UBA2    | 29  | 123.4 | 115.7 | 123   | 76.6  | 84.3  | 77    | 1.61 | 1.37 | 1.60 | 1.53 | 0.00030546 | 1 |
| P63279 | UBE2I   | 5   | 108.8 | 85.1  | 126.7 | 91.2  | 114.9 | 73.3  | 1.19 | 0.74 | 1.73 | 1.22 | 0.46541032 | 1 |
| P42285 | SKIV2L2 | 9   | 128.9 | 130   | 157.9 | 71.1  | 70    | 42.1  | 1.81 | 1.86 | 3.75 | 2.47 | 0.00438714 | 1 |
| P00441 | SOD1    | 8   | 111   | 99.1  | 112.4 | 89    | 100.9 | 87.6  | 1.25 | 0.98 | 1.28 | 1.17 | 0.06579221 | 1 |
| O15260 | SURF4   | 3   | 102.1 | 94.8  | 104.4 | 97.9  | 105.2 | 95.6  | 1.04 | 0.90 | 1.09 | 1.01 | 0.84264107 | 1 |
| Q16637 | SMN1    | 4   | 108.2 | 27.1  | 71.5  | 91.8  | 172.9 | 128.5 | 1.18 | 0.16 | 0.56 | 0.63 | 0.13423674 | 1 |
| Q92925 | SMARCD2 | 2   | 169.3 | 109   | 165.8 | 30.7  | 91    | 34.2  | 5.51 | 1.20 | 4.85 | 3.85 | 0.02544598 | 1 |
| Q9UH65 | SWAP70  | 8   | 134.8 | 109.8 | 100.3 | 65.2  | 90.2  | 99.7  | 2.07 | 1.22 | 1.01 | 1.43 | 0.10880028 | 1 |
| Q92797 | SYMPK   | 22  | 152.5 | 136.2 | 146.9 | 47.5  | 63.8  | 53.1  | 3.21 | 2.13 | 2.77 | 2.70 | 0.00018105 | 1 |
| Q99536 | VAT1    | 15  | 38.7  | 69.9  | 82.6  | 161.3 | 130.1 | 117.4 | 0.24 | 0.54 | 0.70 | 0.49 | 0.01706813 | 1 |
| O43760 | SYNGR2  | 5   | 69.6  | 98.2  | 70.5  | 130.4 | 101.8 | 129.5 | 0.53 | 0.96 | 0.54 | 0.68 | 0.03627287 | 1 |
| O95721 | SNAP29  | 5   | 117.5 | 62.6  | 110.3 | 82.5  | 137.4 | 89.7  | 1.42 | 0.46 | 1.23 | 1.04 | 0.80574681 | 1 |
| Q9NPQ8 | RIC8A   | 4   | 107.4 | 114.2 | 113.6 | 92.6  | 85.8  | 86.4  | 1.16 | 1.33 | 1.31 | 1.27 | 0.00158122 | 1 |
| Q9UMZ2 | SYNRG   | 3   | 127.7 | 105.1 | 118.5 | 72.3  | 94.9  | 81.5  | 1.77 | 1.11 | 1.45 | 1.44 | 0.02110007 | 1 |
| O60499 | STX10   | 5   | 152.8 | 108.9 | 149.3 | 47.2  | 91.1  | 50.7  | 3.24 | 1.20 | 2.94 | 2.46 | 0.02056995 | 1 |
| Q86Y82 | STX12   | 6   | 122.3 | 94.9  | 119.2 | 77.7  | 105.1 | 80.8  | 1.57 | 0.90 | 1.48 | 1.32 | 0.11870183 | 1 |
| Q12846 | STX4    | 8   | 27.3  | 34.8  | 101.7 | 172.7 | 165.2 | 98.3  | 0.16 | 0.21 | 1.03 | 0.47 | 0.05326728 | 1 |
| O43752 | STX6    | 5   | 164.9 | 129.2 | 84.6  | 35.1  | 70.8  | 115.4 | 4.70 | 1.82 | 0.73 | 2.42 | 0.18546237 | 1 |
| O15400 | STX7    | 8   | 151.2 | 134.5 | 159.1 | 48.8  | 65.5  | 40.9  | 3.10 | 2.05 | 3.89 | 3.01 | 0.00070986 | 1 |
| P61764 | STXBP1  | 3   | 1.3   | 66.7  | 60.1  | 198.7 | 133.3 | 139.9 | 0.01 | 0.50 | 0.43 | 0.31 | 0.01756776 | 1 |
| Q15833 | STXBP2  | 2   | 108.8 | 97.6  | 123.7 | 91.2  | 102.4 | 76.3  | 1.19 | 0.95 | 1.62 | 1.26 | 0.13374664 | 1 |
| O00186 | STXBP3  | 3   | 107.9 | 85.1  | 125.2 | 92.1  | 114.9 | 74.8  | 1.17 | 0.74 | 1.67 | 1.20 | 0.5010075  | 1 |
| O00560 | SDCBP   | 8   | 122.9 | 101.4 | 121.4 | 77.1  | 98.6  | 78.6  | 1.59 | 1.03 | 1.54 | 1.39 | 0.03592083 | 1 |
| Q9Y490 | TLN1    | 138 | 123.4 | 117.1 | 124.3 | 76.6  | 82.9  | 75.7  | 1.61 | 1.41 | 1.64 | 1.56 | 0.00017489 | 1 |
| Q9Y4G6 | TLN2    | 10  | 36.8  | 32.6  | 74.7  | 163.2 | 167.4 | 125.3 | 0.23 | 0.19 | 0.60 | 0.34 | 0.00536587 | 1 |
| Q13148 | TARDBP  | 11  | 139   | 125.1 | 136.5 | 61    | 74.9  | 63.5  | 2.28 | 1.67 | 2.15 | 2.03 | 0.00037665 | 1 |
| O60784 | TOM1    | 9   | 97.8  | 69.3  | 90.5  | 102.2 | 130.7 | 109.5 | 0.96 | 0.53 | 0.83 | 0.77 | 0.07950924 | 1 |
| P82094 | TMF1    | 4   | 125.8 | 100.3 | 124.2 | 74.2  | 99.7  | 75.8  | 1.70 | 1.01 | 1.64 | 1.45 | 0.04522033 | 1 |
| Q8TC07 | TBC1D15 | 9   | 147.7 | 166.2 | 163.1 | 52.3  | 33.8  | 36.9  | 2.82 | 4.92 | 4.42 | 4.05 | 0.0001285  | 1 |
| Q9HA65 | TBC1D17 | 2   | 41.4  | 71.3  | 109.5 | 158.6 | 128.7 | 90.5  | 0.26 | 0.55 | 1.21 | 0.67 | 0.13624404 | 1 |
| Q92609 | TBC1D5  | 4   | 140.7 | 110   | 131.4 | 59.3  | 90    | 68.6  | 2.37 | 1.22 | 1.92 | 1.84 | 0.0130723  | 1 |
| Q16650 | TBR1    | 1   | 112.7 | 103.3 | 108.5 | 87.3  | 96.7  | 91.5  | 1.29 | 1.07 | 1.19 | 1.18 | 0.01317698 | 1 |
| P78371 | CCT2    | 45  | 160.1 | 140.3 | 145.2 | 39.9  | 59.7  | 54.8  | 4.01 | 2.35 | 2.65 | 3.00 | 0.00032332 | 1 |
| O43156 | TTI1    | 3   | 158.7 | 133.2 | 133.3 | 41.3  | 66.8  | 66.7  | 3.84 | 1.99 | 2.00 | 2.61 | 0.00224318 | 1 |
| Q9BUR4 | WRAP53  | 2   | 57.1  | 128.6 | 128   | 142.9 | 71.4  | 72    | 0.40 | 1.80 | 1.78 | 1.33 | 0.79900586 | 1 |
| Q9Y4R8 | TELO2   | 2   | 89.6  | 52.4  | 111   | 110.4 | 147.6 | 89    | 0.81 | 0.36 | 1.25 | 0.80 | 0.26527498 | 1 |
| Q9NYB0 | TERF2IP | 1   | 136.8 | 121.4 | 105.7 | 63.2  | 78.6  | 94.3  | 2.16 | 1.54 | 1.12 | 1.61 | 0.02843127 | 1 |
| Q68CZ2 | TNS3    | 22  | 8.6   | 42.6  | 21.6  | 191.4 | 157.4 | 178.4 | 0.04 | 0.27 | 0.12 | 0.15 | 0.00041497 | 1 |

|        |          |    |       |       |       |       |       |       |      |      |      |      |            |   |
|--------|----------|----|-------|-------|-------|-------|-------|-------|------|------|------|------|------------|---|
| Q6PGP7 | TTC37    | 7  | 97.8  | 71.9  | 115.6 | 102.2 | 128.1 | 84.4  | 0.96 | 0.56 | 1.37 | 0.96 | 0.61396785 | 1 |
| Q8N5M4 | TTC9C    | 5  | 119.5 | 27.6  | 96.8  | 80.5  | 172.4 | 103.2 | 1.48 | 0.16 | 0.94 | 0.86 | 0.39282337 | 1 |
| P52888 | THOP1    | 8  | 162.8 | 139.4 | 153.8 | 37.2  | 60.6  | 46.2  | 4.38 | 2.30 | 3.33 | 3.34 | 0.00041822 | 1 |
| P51580 | TPMT     | 11 | 146.3 | 109.8 | 130.6 | 53.7  | 90.2  | 69.4  | 2.72 | 1.22 | 1.88 | 1.94 | 0.01804931 | 1 |
| O95881 | TXNDC12  | 3  | 140.2 | 128.2 | 80.7  | 59.8  | 71.8  | 119.3 | 2.34 | 1.79 | 0.68 | 1.60 | 0.27162362 | 1 |
| O14530 | TXNDC9   | 6  | 165.6 | 129.9 | 173.6 | 34.4  | 70.1  | 26.4  | 4.81 | 1.85 | 6.58 | 4.41 | 0.00404282 | 1 |
| O43396 | TXNL1    | 18 | 137.4 | 108.2 | 131.7 | 62.6  | 91.8  | 68.3  | 2.19 | 1.18 | 1.93 | 1.77 | 0.01512598 | 1 |
| Q9H3N1 | TMX1     | 9  | 81.4  | 72.2  | 90.7  | 118.6 | 127.8 | 109.3 | 0.69 | 0.56 | 0.83 | 0.69 | 0.00794868 | 1 |
| Q9Y320 | TMX2     | 4  | 77.2  | 85.4  | 3.9   | 122.8 | 114.6 | 196.1 | 0.63 | 0.75 | 0.02 | 0.46 | 0.07205548 | 1 |
| Q16762 | TST      | 11 | 18.3  | 40.8  | 36.2  | 181.7 | 159.2 | 163.8 | 0.10 | 0.26 | 0.22 | 0.19 | 0.00014848 | 1 |
| Q96FV9 | THOC1    | 7  | 163.4 | 177.5 | 155.9 | 36.6  | 22.5  | 44.1  | 4.46 | 7.89 | 3.54 | 5.30 | 0.00012624 | 1 |
| Q86V81 | ALYREF   | 5  | 100.9 | 91.5  | 108.8 | 99.1  | 108.5 | 91.2  | 1.02 | 0.84 | 1.19 | 1.02 | 0.91537831 | 1 |
| Q9NXG2 | THUMPD1  | 8  | 51.8  | 70.9  | 62    | 148.2 | 129.1 | 138   | 0.35 | 0.55 | 0.45 | 0.45 | 0.00059581 | 1 |
| Q9BV44 | THUMPD2  | 4  | 113   | 103   | 118.5 | 87    | 97    | 81.5  | 1.30 | 1.06 | 1.45 | 1.27 | 0.02307029 | 1 |
| P04183 | TK1      | 10 | 148.3 | 77.5  | 141   | 51.7  | 122.5 | 59    | 2.87 | 0.63 | 2.39 | 1.96 | 0.23392119 | 1 |
| Q07157 | TJP1     | 46 | 109.3 | 100.4 | 111.2 | 90.7  | 99.6  | 88.8  | 1.21 | 1.01 | 1.25 | 1.16 | 0.04156662 | 1 |
| Q9H0E2 | TOLLIP   | 7  | 65.9  | 67    | 52.2  | 134.1 | 133   | 147.8 | 0.49 | 0.50 | 0.35 | 0.45 | 0.00034033 | 1 |
| Q6ZVM7 | TOM1L2   | 7  | 145.8 | 48.8  | 111.3 | 54.2  | 151.2 | 88.7  | 2.69 | 0.32 | 1.25 | 1.42 | 0.92666527 | 1 |
| O14656 | TOR1A    | 9  | 110.7 | 111.3 | 121.3 | 89.3  | 88.7  | 78.7  | 1.24 | 1.25 | 1.54 | 1.35 | 0.00403396 | 1 |
| Q5JTV8 | TOR1AIP1 | 8  | 55    | 140   | 110.5 | 145   | 60    | 89.5  | 0.38 | 2.33 | 1.23 | 1.32 | 0.92213496 | 1 |
| Q8NFQ8 | TOR1AIP2 | 5  | 142.9 | 122.9 | 111   | 57.1  | 77.1  | 89    | 2.50 | 1.59 | 1.25 | 1.78 | 0.01769223 | 1 |
| O14657 | TOR1B    | 2  | 133.2 | 114.4 | 112.6 | 66.8  | 85.6  | 87.4  | 1.99 | 1.34 | 1.29 | 1.54 | 0.01256449 | 1 |
| Q96S44 | TP53RK   | 5  | 99.5  | 123   | 104.2 | 100.5 | 77    | 95.8  | 0.99 | 1.60 | 1.09 | 1.23 | 0.15444723 | 1 |
| P37837 | TALDO1   | 28 | 38.5  | 56.4  | 37    | 161.5 | 143.6 | 163   | 0.24 | 0.39 | 0.23 | 0.29 | 0.00022031 | 1 |
| P23193 | TCEA1    | 18 | 144.9 | 122.2 | 134.2 | 55.1  | 77.8  | 65.8  | 2.63 | 1.57 | 2.04 | 2.08 | 0.00188855 | 1 |
| Q7KZ85 | SUPT6H   | 31 | 114   | 99.6  | 106.7 | 86    | 100.4 | 93.3  | 1.33 | 0.99 | 1.14 | 1.15 | 0.08275745 | 1 |
| Q96K17 | BTF3L4   | 4  | 153.9 | 130.9 | 162.9 | 46.1  | 69.1  | 37.1  | 3.34 | 1.89 | 4.39 | 3.21 | 0.00186489 | 1 |
| P20290 | BTF3     | 13 | 125.1 | 123.7 | 132.4 | 74.9  | 76.3  | 67.6  | 1.67 | 1.62 | 1.96 | 1.75 | 0.00014312 | 1 |
| O15164 | TRIM24   | 4  | 127.8 | 116.6 | 101.2 | 72.2  | 83.4  | 98.8  | 1.77 | 1.40 | 1.02 | 1.40 | 0.04942008 | 1 |
| Q13263 | TRIM28   | 30 | 122.1 | 116.9 | 127.1 | 77.9  | 83.1  | 72.9  | 1.57 | 1.41 | 1.74 | 1.57 | 0.00045133 | 1 |
| P46937 | YAP1     | 8  | 159.8 | 159.1 | 138.5 | 40.2  | 40.9  | 61.5  | 3.98 | 3.89 | 2.25 | 3.37 | 0.00044493 | 1 |
| P49711 | CTCF     | 4  | 119.5 | 105.6 | 113.9 | 80.5  | 94.4  | 86.1  | 1.48 | 1.12 | 1.32 | 1.31 | 0.01039204 | 1 |
| Q9Y4P3 | TBL2     | 2  | 88.4  | 113.8 | 118.4 | 111.6 | 86.2  | 81.6  | 0.79 | 1.32 | 1.45 | 1.19 | 0.35665127 | 1 |
| P02786 | TFRC     | 24 | 102   | 75.5  | 93.9  | 98    | 124.5 | 106.1 | 1.04 | 0.61 | 0.89 | 0.84 | 0.16061883 | 1 |
| Q13595 | TRA2A    | 3  | 81.2  | 112.3 | 135.1 | 118.8 | 87.7  | 64.9  | 0.68 | 1.28 | 2.08 | 1.35 | 0.43676949 | 1 |
| P62995 | TRA2B    | 8  | 172.1 | 116   | 161   | 27.9  | 84    | 39    | 6.17 | 1.38 | 4.13 | 3.89 | 0.01487903 | 1 |
| O95359 | TACC2    | 3  | 72.6  | 59.9  | 104.2 | 127.4 | 140.1 | 95.8  | 0.57 | 0.43 | 1.09 | 0.70 | 0.08614028 | 1 |
| P61586 | RHOA     | 5  | 114.1 | 97    | 112.7 | 85.9  | 103   | 87.3  | 1.33 | 0.94 | 1.29 | 1.19 | 0.11009608 | 1 |
| P37802 | TAGLN2   | 18 | 73.5  | 62.4  | 72.9  | 126.5 | 137.6 | 127.1 | 0.58 | 0.45 | 0.57 | 0.54 | 0.00028297 | 1 |
| O43493 | TGOLN2   | 9  | 128.7 | 118.2 | 125.5 | 71.3  | 81.8  | 74.5  | 1.81 | 1.44 | 1.68 | 1.64 | 0.00039035 | 1 |
| Q14232 | EIF2B1   | 17 | 96.9  | 116   | 102.9 | 103.1 | 84    | 97.1  | 0.94 | 1.38 | 1.06 | 1.13 | 0.25707087 | 1 |

|        |         |    |       |       |       |       |       |       |      |      |      |      |            |   |
|--------|---------|----|-------|-------|-------|-------|-------|-------|------|------|------|------|------------|---|
| Q9Y2S6 | TMA7    | 4  | 141.4 | 140.6 | 112.7 | 58.6  | 59.4  | 87.3  | 2.41 | 2.37 | 1.29 | 2.02 | 0.0090977  | 1 |
| Q9BSH4 | TACO1   | 10 | 96.1  | 110.6 | 87.1  | 103.9 | 89.4  | 112.9 | 0.92 | 1.24 | 0.77 | 0.98 | 0.6913918  | 1 |
| P13693 | TPT1    | 8  | 126.9 | 162.8 | 125.8 | 73.1  | 37.2  | 74.2  | 1.74 | 4.38 | 1.70 | 2.60 | 0.01099219 | 1 |
| Q15631 | TSN     | 14 | 120.5 | 108.5 | 122.1 | 79.5  | 91.5  | 77.9  | 1.52 | 1.19 | 1.57 | 1.42 | 0.00495035 | 1 |
| P43307 | SSR1    | 4  | 119.4 | 91.8  | 120.2 | 80.6  | 108.2 | 79.8  | 1.48 | 0.85 | 1.51 | 1.28 | 0.18804468 | 1 |
| P51571 | SSR4    | 5  | 124.4 | 124.5 | 151.6 | 75.6  | 75.5  | 48.4  | 1.65 | 1.65 | 3.13 | 2.14 | 0.00636233 | 1 |
| Q9UNL2 | SSR3    | 2  | 118.7 | 112.6 | 136.6 | 81.3  | 87.4  | 63.4  | 1.46 | 1.29 | 2.15 | 1.63 | 0.01129533 | 1 |
| P30408 | TM4SF1  | 1  | 89    | 78    | 68.8  | 111   | 122   | 131.2 | 0.80 | 0.64 | 0.52 | 0.66 | 0.006592   | 1 |
| O15321 | TM9SF1  | 4  | 83.1  | 67.8  | 78.5  | 116.9 | 132.2 | 121.5 | 0.71 | 0.51 | 0.65 | 0.62 | 0.00183119 | 1 |
| Q99805 | TM9SF2  | 9  | 99.9  | 95.6  | 98.7  | 100.1 | 104.4 | 101.3 | 1.00 | 0.92 | 0.97 | 0.96 | 0.09972606 | 1 |
| Q9HD45 | TM9SF3  | 9  | 103.6 | 90.1  | 102.9 | 96.4  | 109.9 | 97.1  | 1.07 | 0.82 | 1.06 | 0.98 | 0.73340884 | 1 |
| Q92544 | TM9SF4  | 9  | 103.2 | 104.7 | 110.4 | 96.8  | 95.3  | 89.6  | 1.07 | 1.10 | 1.23 | 1.13 | 0.01705361 | 1 |
| Q71RG4 | TMUB2   | 3  | 17.1  | 26.2  | 84.8  | 182.9 | 173.8 | 115.2 | 0.09 | 0.15 | 0.74 | 0.33 | 0.01877852 | 1 |
| Q13445 | TMED1   | 2  | 109.7 | 91.2  | 111.3 | 90.3  | 108.8 | 88.7  | 1.21 | 0.84 | 1.25 | 1.10 | 0.42296384 | 1 |
| P49755 | TMED10  | 11 | 91.4  | 85.4  | 93.6  | 108.6 | 114.6 | 106.4 | 0.84 | 0.75 | 0.88 | 0.82 | 0.00469844 | 1 |
| Q7Z7H5 | TMED4   | 7  | 101.3 | 114.3 | 98.6  | 98.7  | 85.7  | 101.4 | 1.03 | 1.33 | 0.97 | 1.11 | 0.2393573  | 1 |
| Q9Y3B3 | TMED7   | 8  | 93.7  | 45    | 97.2  | 106.3 | 155   | 102.8 | 0.88 | 0.29 | 0.95 | 0.71 | 0.14732905 | 1 |
| Q9BVK6 | TMED9   | 6  | 89.4  | 93.8  | 75.4  | 110.6 | 106.2 | 124.6 | 0.81 | 0.88 | 0.61 | 0.77 | 0.02449227 | 1 |
| Q9BVC6 | TMEM109 | 5  | 74.6  | 1.9   | 42.3  | 125.4 | 198.1 | 157.7 | 0.59 | 0.01 | 0.27 | 0.29 | 0.01532682 | 1 |
| Q9H061 | TMEM126 | 2  | 97.6  | 88.3  | 88.2  | 102.4 | 111.7 | 111.8 | 0.95 | 0.79 | 0.79 | 0.84 | 0.0172873  | 1 |
| Q9HC07 | TMEM165 | 3  | 115.7 | 114.3 | 119.7 | 84.3  | 85.7  | 80.3  | 1.37 | 1.33 | 1.49 | 1.40 | 0.00013223 | 1 |
| Q7Z7N9 | TMEM179 | 2  | 45.1  | 76.7  | 135.9 | 154.9 | 123.3 | 64.1  | 0.29 | 0.62 | 2.12 | 1.01 | 0.4953408  | 1 |
| Q6NUQ4 | TMEM214 | 9  | 76.6  | 70.7  | 81.9  | 123.4 | 129.3 | 118.1 | 0.62 | 0.55 | 0.69 | 0.62 | 0.00049781 | 1 |
| Q9H0R3 | TMEM222 | 3  | 87.4  | 68.8  | 82.2  | 112.6 | 131.2 | 117.8 | 0.78 | 0.52 | 0.70 | 0.67 | 0.00633558 | 1 |
| Q96A57 | TMEM230 | 3  | 75.5  | 60    | 62.2  | 124.5 | 140   | 137.8 | 0.61 | 0.43 | 0.45 | 0.50 | 0.00057079 | 1 |
| P61165 | TMEM258 | 1  | 120   | 114.3 | 129.2 | 80    | 85.7  | 70.8  | 1.50 | 1.33 | 1.82 | 1.55 | 0.00231815 | 1 |
| Q96GE9 | TMEM261 | 1  | 133   | 120.6 | 126.9 | 67    | 79.4  | 73.1  | 1.99 | 1.52 | 1.74 | 1.75 | 0.00044819 | 1 |
| Q9BTV4 | TMEM43  | 8  | 137.9 | 107.9 | 117.2 | 62.1  | 92.1  | 82.8  | 2.22 | 1.17 | 1.42 | 1.60 | 0.02857897 | 1 |
| Q9BUB7 | TMEM70  | 4  | 118.1 | 125.3 | 99.1  | 81.9  | 74.7  | 100.9 | 1.44 | 1.68 | 0.98 | 1.37 | 0.06239416 | 1 |
| Q92973 | TNPO1   | 22 | 115.4 | 111.8 | 110.1 | 84.6  | 88.2  | 89.9  | 1.36 | 1.27 | 1.22 | 1.29 | 0.00035514 | 1 |
| Q9Y5L0 | TNPO3   | 8  | 124.3 | 95.4  | 111.8 | 75.7  | 104.6 | 88.2  | 1.64 | 0.91 | 1.27 | 1.27 | 0.15064205 | 1 |
| Q13428 | TCOF1   | 30 | 132.9 | 146.1 | 152.1 | 67.1  | 53.9  | 47.9  | 1.98 | 2.71 | 3.18 | 2.62 | 0.00040254 | 1 |
| P53007 | SLC25A1 | 9  | 85.1  | 104.5 | 78.5  | 114.9 | 95.5  | 121.5 | 0.74 | 1.09 | 0.65 | 0.83 | 0.1262184  | 1 |
| P40939 | HADHA   | 33 | 100.1 | 95.1  | 99.8  | 99.9  | 104.9 | 100.2 | 1.00 | 0.91 | 1.00 | 0.97 | 0.2191382  | 1 |
| P55084 | HADHB   | 20 | 122.8 | 85.2  | 100.9 | 77.2  | 114.8 | 99.1  | 1.59 | 0.74 | 1.02 | 1.12 | 0.71997463 | 1 |
| Q9NVV0 | TMEM38E | 2  | 113.8 | 105.5 | 119   | 86.2  | 94.5  | 81    | 1.32 | 1.12 | 1.47 | 1.30 | 0.01008644 | 1 |
| P60174 | TPI1    | 26 | 108.7 | 83.3  | 105.1 | 91.3  | 116.7 | 94.9  | 1.19 | 0.71 | 1.11 | 1.00 | 0.8715801  | 1 |
| Q96LD4 | TRIM47  | 9  | 47.6  | 63    | 66.4  | 152.4 | 137   | 133.6 | 0.31 | 0.46 | 0.50 | 0.42 | 0.00055662 | 1 |
| O14773 | TPP1    | 4  | 29.2  | 93.7  | 88.4  | 170.8 | 106.3 | 111.6 | 0.17 | 0.88 | 0.79 | 0.61 | 0.1131643  | 1 |
| Q7Z2T5 | TRMT1L  | 1  | 102.4 | 75.9  | 83.2  | 97.6  | 124.1 | 116.8 | 1.05 | 0.61 | 0.71 | 0.79 | 0.08325598 | 1 |
| Q96FX7 | TRMT61A | 9  | 129.9 | 111.3 | 140.4 | 70.1  | 88.7  | 59.6  | 1.85 | 1.25 | 2.36 | 1.82 | 0.01064934 | 1 |

|        |          |    |       |       |       |       |       |       |      |      |      |      |            |   |
|--------|----------|----|-------|-------|-------|-------|-------|-------|------|------|------|------|------------|---|
| Q08J23 | NSUN2    | 22 | 119.4 | 111.7 | 123.9 | 80.6  | 88.3  | 76.1  | 1.48 | 1.27 | 1.63 | 1.46 | 0.00189293 | 1 |
| Q9UBP6 | METTL1   | 9  | 107.5 | 95.9  | 87.9  | 92.5  | 104.1 | 112.1 | 1.16 | 0.92 | 0.78 | 0.96 | 0.51090517 | 1 |
| Q9BSV6 | TSEN34   | 4  | 83.1  | 85.8  | 91.6  | 116.9 | 114.2 | 108.4 | 0.71 | 0.75 | 0.85 | 0.77 | 0.00175557 | 1 |
| Q13641 | TPBG     | 4  | 107   | 93.2  | 87.8  | 93    | 106.8 | 112.2 | 1.15 | 0.87 | 0.78 | 0.94 | 0.37841462 | 1 |
| Q9NYL9 | TMOD3    | 8  | 40.1  | 92    | 51.1  | 159.9 | 108   | 148.9 | 0.25 | 0.85 | 0.34 | 0.48 | 0.02518719 | 1 |
| P09493 | TPM1     | 5  | 62.1  | 45.1  | 62.1  | 137.9 | 154.9 | 137.9 | 0.45 | 0.29 | 0.45 | 0.40 | 0.00040615 | 1 |
| P06753 | TPM3     | 9  | 118.7 | 88.6  | 121.1 | 81.3  | 111.4 | 78.9  | 1.46 | 0.80 | 1.53 | 1.26 | 0.26962245 | 1 |
| P67936 | TPM4     | 17 | 102.9 | 62.3  | 107.8 | 97.1  | 137.7 | 92.2  | 1.06 | 0.45 | 1.17 | 0.89 | 0.42726154 | 1 |
| P07951 | TPM2     | 2  | 57    | 136.3 | 126.9 | 143   | 63.7  | 73.1  | 0.40 | 2.14 | 1.74 | 1.42 | 0.72279604 | 1 |
| Q71U36 | TUBA1A   | 3  | 117.4 | 129.9 | 127.9 | 82.6  | 70.1  | 72.1  | 1.42 | 1.85 | 1.77 | 1.68 | 0.00079367 | 1 |
| Q9BQE3 | TUBA1C   | 3  | 133   | 117.7 | 129.4 | 67    | 82.3  | 70.6  | 1.99 | 1.43 | 1.83 | 1.75 | 0.00121873 | 1 |
| P68366 | TUBA4A   | 8  | 118.4 | 125.5 | 119.7 | 81.6  | 74.5  | 80.3  | 1.45 | 1.68 | 1.49 | 1.54 | 0.0001627  | 1 |
| P07437 | TUBB     | 6  | 131.4 | 124.2 | 122.6 | 68.6  | 75.8  | 77.4  | 1.92 | 1.64 | 1.58 | 1.71 | 0.00016821 | 1 |
| Q13885 | TUBB2A   | 2  | 163.7 | 114.9 | 141.6 | 36.3  | 85.1  | 58.4  | 4.51 | 1.35 | 2.42 | 2.76 | 0.01591309 | 1 |
| Q13509 | TUBB3    | 14 | 107.1 | 100.6 | 107.5 | 92.9  | 99.4  | 92.5  | 1.15 | 1.01 | 1.16 | 1.11 | 0.03277297 | 1 |
| Q99426 | TBCB     | 17 | 125   | 109.6 | 134.9 | 75    | 90.4  | 65.1  | 1.67 | 1.21 | 2.07 | 1.65 | 0.01123831 | 1 |
| O75347 | TBCA     | 9  | 135.5 | 130.8 | 151.4 | 64.5  | 69.2  | 48.6  | 2.10 | 1.89 | 3.12 | 2.37 | 0.00088008 | 1 |
| Q9BTW9 | TBCD     | 6  | 93    | 146   | 110.5 | 107   | 54    | 89.5  | 0.87 | 2.70 | 1.23 | 1.60 | 0.20882402 | 1 |
| Q14166 | TLL12    | 13 | 137.8 | 125.1 | 134.3 | 62.2  | 74.9  | 65.7  | 2.22 | 1.67 | 2.04 | 1.98 | 0.00026772 | 1 |
| Q9Y2W6 | TDRKH    | 3  | 119.3 | 80.5  | 104   | 80.7  | 119.5 | 96    | 1.48 | 0.67 | 1.08 | 1.08 | 0.88155489 | 1 |
| Q8NHU6 | TDRD7    | 3  | 126.2 | 113   | 105.6 | 73.8  | 87    | 94.4  | 1.71 | 1.30 | 1.12 | 1.38 | 0.02477582 | 1 |
| P55327 | TPD52    | 12 | 97.8  | 80.7  | 100.5 | 102.2 | 119.3 | 99.5  | 0.96 | 0.68 | 1.01 | 0.88 | 0.18552534 | 1 |
| O43399 | TPD52L2  | 11 | 124.6 | 84.2  | 113.5 | 75.4  | 115.8 | 86.5  | 1.65 | 0.73 | 1.31 | 1.23 | 0.43225017 | 1 |
| Q6IBS0 | TWF2     | 5  | 59.4  | 176.2 | 152.5 | 140.6 | 23.8  | 47.5  | 0.42 | 7.40 | 3.21 | 3.68 | 0.3087267  | 1 |
| Q6RW13 | AGTRAP   | 2  | 158.4 | 129.3 | 144.8 | 41.6  | 70.7  | 55.2  | 3.81 | 1.83 | 2.62 | 2.75 | 0.00175166 | 1 |
| Q06124 | PTPN11   | 19 | 58    | 105.5 | 117.8 | 142   | 94.5  | 82.2  | 0.41 | 1.12 | 1.43 | 0.99 | 0.65401981 | 1 |
| Q05209 | PTPN12   | 7  | 97    | 71.7  | 88.9  | 103   | 128.3 | 111.1 | 0.94 | 0.56 | 0.80 | 0.77 | 0.05525448 | 1 |
| Q9H3S7 | PTPN23   | 6  | 63    | 6.9   | 149.5 | 137   | 193.1 | 50.5  | 0.46 | 0.04 | 2.96 | 1.15 | 0.41145551 | 1 |
| P54577 | YARS     | 36 | 175.3 | 141.8 | 152.2 | 24.7  | 58.2  | 47.8  | 7.10 | 2.44 | 3.18 | 4.24 | 0.00128566 | 1 |
| P09012 | SNRPA    | 8  | 93.1  | 90.2  | 124.4 | 106.9 | 109.8 | 75.6  | 0.87 | 0.82 | 1.65 | 1.11 | 0.75688744 | 1 |
| P09234 | SNRPC    | 4  | 134   | 104.8 | 91.7  | 66    | 95.2  | 108.3 | 2.03 | 1.10 | 0.85 | 1.33 | 0.31421644 | 1 |
| P09661 | SNRPA1   | 12 | 98.7  | 81.9  | 105.1 | 101.3 | 118.1 | 94.9  | 0.97 | 0.69 | 1.11 | 0.93 | 0.38501679 | 1 |
| P08579 | SNRPB2   | 8  | 88.7  | 82.8  | 127.4 | 111.3 | 117.2 | 72.6  | 0.80 | 0.71 | 1.75 | 1.09 | 0.97220377 | 1 |
| O15042 | U2SURP   | 24 | 144.2 | 130.1 | 144.2 | 55.8  | 69.9  | 55.8  | 2.58 | 1.86 | 2.58 | 2.34 | 0.00028699 | 1 |
| Q53GS9 | USP39    | 5  | 112.4 | 123.1 | 177.6 | 87.6  | 76.9  | 22.4  | 1.28 | 1.60 | 7.93 | 3.60 | 0.05751981 | 1 |
| O75643 | SNRNP200 | 59 | 150.4 | 133.6 | 149.4 | 49.6  | 66.4  | 50.6  | 3.03 | 2.01 | 2.95 | 2.67 | 0.00032011 | 1 |
| Q96DI7 | SNRNP40  | 8  | 136.3 | 98.4  | 124.1 | 63.7  | 101.6 | 75.9  | 2.14 | 0.97 | 1.64 | 1.58 | 0.06809601 | 1 |
| Q9Y333 | LSM2     | 3  | 141.1 | 160.9 | 162.9 | 58.9  | 39.1  | 37.1  | 2.40 | 4.12 | 4.39 | 3.63 | 0.00036528 | 1 |
| Q9Y4Z0 | LSM4     | 3  | 153   | 128.5 | 137.6 | 47    | 71.5  | 62.4  | 3.26 | 1.80 | 2.21 | 2.42 | 0.00142106 | 1 |
| P62312 | LSM6     | 4  | 147.5 | 176.5 | 109.5 | 52.5  | 23.5  | 90.5  | 2.81 | 7.51 | 1.21 | 3.84 | 0.03155253 | 1 |
| Q9NRR5 | UBQLN4   | 3  | 113.7 | 127.6 | 139.2 | 86.3  | 72.4  | 60.8  | 1.32 | 1.76 | 2.29 | 1.79 | 0.00675304 | 1 |

|        |           |    |       |       |       |       |       |       |      |       |       |       |            |   |
|--------|-----------|----|-------|-------|-------|-------|-------|-------|------|-------|-------|-------|------------|---|
| O75208 | COQ9      | 5  | 57.9  | 85.6  | 83    | 142.1 | 114.4 | 117   | 0.41 | 0.75  | 0.71  | 0.62  | 0.01720332 | 1 |
| P51784 | USP11     | 4  | 115.2 | 103.1 | 114.5 | 84.8  | 96.9  | 85.5  | 1.36 | 1.06  | 1.34  | 1.25  | 0.01692395 | 1 |
| Q9UPU5 | USP24     | 9  | 46.2  | 136.5 | 155.8 | 153.8 | 63.5  | 44.2  | 0.30 | 2.15  | 3.52  | 1.99  | 0.61956685 | 1 |
| Q96RU2 | USP28     | 5  | 153.7 | 177.8 | 105.8 | 46.3  | 22.2  | 94.2  | 3.32 | 8.01  | 1.12  | 4.15  | 0.03770188 | 1 |
| Q13107 | USP4      | 6  | 173   | 51.2  | 163.1 | 27    | 148.8 | 36.9  | 6.41 | 0.34  | 4.42  | 3.72  | 0.35144316 | 1 |
| Q96K76 | USP47     | 18 | 98.3  | 92.1  | 112.6 | 101.7 | 107.9 | 87.4  | 0.97 | 0.85  | 1.29  | 1.04  | 0.82720663 | 1 |
| Q93009 | USP7      | 29 | 105.1 | 98.4  | 109   | 94.9  | 101.6 | 91    | 1.11 | 0.97  | 1.20  | 1.09  | 0.12968606 | 1 |
| P40818 | USP8      | 13 | 104.8 | 98.7  | 112.3 | 95.2  | 101.3 | 87.7  | 1.10 | 0.97  | 1.28  | 1.12  | 0.13117206 | 1 |
| P09936 | UCHL1     | 13 | 110   | 83.1  | 109.5 | 90    | 116.9 | 90.5  | 1.22 | 0.71  | 1.21  | 1.05  | 0.8969428  | 1 |
| P15374 | UCHL3     | 4  | 90.9  | 119.3 | 91.3  | 109.1 | 80.7  | 108.7 | 0.83 | 1.48  | 0.84  | 1.05  | 0.94365256 | 1 |
| Q9Y5K5 | UCHL5     | 15 | 66.8  | 126.8 | 67.1  | 133.2 | 73.2  | 132.9 | 0.50 | 1.73  | 0.50  | 0.91  | 0.40564826 | 1 |
| Q96FW1 | OTUB1     | 12 | 105.4 | 129.8 | 114.5 | 94.6  | 70.2  | 85.5  | 1.11 | 1.85  | 1.34  | 1.43  | 0.03018733 | 1 |
| Q5T6F2 | UBAP2     | 10 | 124.5 | 132.4 | 142.5 | 75.5  | 67.6  | 57.5  | 1.65 | 1.96  | 2.48  | 2.03  | 0.0008455  | 1 |
| O00762 | UBE2C     | 6  | 172.3 | 154.6 | 118.9 | 27.7  | 45.4  | 81.1  | 6.22 | 3.41  | 1.47  | 3.70  | 0.01190729 | 1 |
| P61077 | UBE2D3    | 2  | 124.2 | 161.1 | 128   | 75.8  | 38.9  | 72    | 1.64 | 4.14  | 1.78  | 2.52  | 0.01035526 | 1 |
| P61088 | UBE2N     | 7  | 124   | 127.7 | 112.8 | 76    | 72.3  | 87.2  | 1.63 | 1.77  | 1.29  | 1.56  | 0.00245915 | 1 |
| Q712K3 | UBE2R2    | 5  | 146.5 | 128.9 | 130   | 53.5  | 71.1  | 70    | 2.74 | 1.81  | 1.86  | 2.14  | 0.00094898 | 1 |
| Q92575 | UBXN4     | 5  | 112.1 | 104.5 | 112.8 | 87.9  | 95.5  | 87.2  | 1.28 | 1.09  | 1.29  | 1.22  | 0.00645046 | 1 |
| O94888 | UBXN7     | 7  | 159.5 | 108.1 | 152.7 | 40.5  | 91.9  | 47.3  | 3.94 | 1.18  | 3.23  | 2.78  | 0.02449434 | 1 |
| Q14376 | GALE      | 17 | 60.3  | 78.5  | 57.2  | 139.7 | 121.5 | 142.8 | 0.43 | 0.65  | 0.40  | 0.49  | 0.00179781 | 1 |
| Q9NYU2 | UGGT1     | 49 | 111.2 | 107.3 | 110.1 | 88.8  | 92.7  | 89.9  | 1.25 | 1.16  | 1.22  | 1.21  | 0.00031418 | 1 |
| Q16222 | UAP1      | 29 | 120.7 | 189.6 | 190.3 | 79.3  | 10.4  | 9.7   | 1.52 | 18.23 | 19.62 | 13.12 | 0.01489603 | 1 |
| P30085 | CMPK1     | 14 | 101.6 | 98    | 104.4 | 98.4  | 102   | 95.6  | 1.03 | 0.96  | 1.09  | 1.03  | 0.3662538  | 1 |
| Q9BQ61 | C19orf43  | 6  | 131.3 | 107.8 | 129.5 | 68.7  | 92.2  | 70.5  | 1.91 | 1.17  | 1.84  | 1.64  | 0.01282192 | 1 |
| O43795 | MYO1B     | 4  | 76.5  | 111.8 | 78.9  | 123.5 | 88.2  | 121.1 | 0.62 | 1.27  | 0.65  | 0.85  | 0.24607888 | 1 |
| O00159 | MYO1C     | 11 | 137.7 | 146.4 | 154.7 | 62.3  | 53.6  | 45.3  | 2.21 | 2.73  | 3.42  | 2.79  | 0.00018302 | 1 |
| Q12965 | MYO1E     | 7  | 88.9  | 73.9  | 72.1  | 111.1 | 126.1 | 127.9 | 0.80 | 0.59  | 0.56  | 0.65  | 0.00449931 | 1 |
| Q9HB07 | C12orf10  | 9  | 138.5 | 114.1 | 128.1 | 61.5  | 85.9  | 71.9  | 2.25 | 1.33  | 1.78  | 1.79  | 0.00576311 | 1 |
| Q5T6V5 | C9orf64   | 11 | 102.5 | 121.5 | 115.3 | 97.5  | 78.5  | 84.7  | 1.05 | 1.55  | 1.36  | 1.32  | 0.02960534 | 1 |
| Q9Y224 | C14orf166 | 18 | 93.4  | 91.9  | 87.4  | 106.6 | 108.1 | 112.6 | 0.88 | 0.85  | 0.78  | 0.83  | 0.00203662 | 1 |
| A6NDU8 | C5orf51   | 5  | 96.4  | 95.8  | 91.7  | 103.6 | 104.2 | 108.3 | 0.93 | 0.92  | 0.85  | 0.90  | 0.00679587 | 1 |
| Q8IYL3 | C1orf174  | 2  | 162.5 | 117.9 | 128   | 37.5  | 82.1  | 72    | 4.33 | 1.44  | 1.78  | 2.52  | 0.01935759 | 1 |
| O95848 | NUDT14    | 2  | 100   | 74.7  | 86    | 100   | 125.3 | 114   | 1.00 | 0.60  | 0.75  | 0.78  | 0.06453929 | 1 |
| Q16831 | UPP1      | 12 | 140.2 | 101.5 | 143.6 | 59.8  | 98.5  | 56.4  | 2.34 | 1.03  | 2.55  | 1.97  | 0.0408175  | 1 |
| Q9BZX2 | UCK2      | 5  | 109.4 | 150.5 | 143.6 | 90.6  | 49.5  | 56.4  | 1.21 | 3.04  | 2.55  | 2.26  | 0.01846555 | 1 |
| Q9BZF9 | UACA      | 7  | 90.5  | 105.3 | 95    | 109.5 | 94.7  | 105   | 0.83 | 1.11  | 0.90  | 0.95  | 0.37818207 | 1 |
| Q3ZAQ7 | VMA21     | 4  | 137.1 | 150.4 | 124.9 | 62.9  | 49.6  | 75.1  | 2.18 | 3.03  | 1.66  | 2.29  | 0.00197652 | 1 |
| O75436 | VPS26A    | 9  | 101.7 | 136.8 | 108.1 | 98.3  | 63.2  | 91.9  | 1.03 | 2.16  | 1.18  | 1.46  | 0.11152416 | 1 |
| Q9UK41 | VPS28     | 6  | 117.7 | 109.2 | 126   | 82.3  | 90.8  | 74    | 1.43 | 1.20  | 1.70  | 1.45  | 0.00678253 | 1 |
| Q9UBQ0 | VPS29     | 4  | 112.3 | 85.3  | 113.3 | 87.7  | 114.7 | 86.7  | 1.28 | 0.74  | 1.31  | 1.11  | 0.60519159 | 1 |
| Q96QK1 | VPS35     | 21 | 121.6 | 115.3 | 117.1 | 78.4  | 84.7  | 82.9  | 1.55 | 1.36  | 1.41  | 1.44  | 0.00016986 | 1 |

|        |          |    |       |       |       |       |       |       |      |      |       |      |            |   |
|--------|----------|----|-------|-------|-------|-------|-------|-------|------|------|-------|------|------------|---|
| Q5VIR6 | VPS53    | 3  | 123.6 | 115.1 | 114.7 | 76.4  | 84.9  | 85.3  | 1.62 | 1.36 | 1.34  | 1.44 | 0.00097239 | 1 |
| Q9NP79 | VTA1     | 7  | 155.1 | 145   | 135.5 | 44.9  | 55    | 64.5  | 3.45 | 2.64 | 2.10  | 2.73 | 0.00035004 | 1 |
| Q9BRG1 | VPS25    | 3  | 113.3 | 81.5  | 142.1 | 86.7  | 118.5 | 57.9  | 1.31 | 0.69 | 2.45  | 1.48 | 0.37650995 | 1 |
| Q96GC9 | VMP1     | 1  | 94.9  | 85.4  | 97.3  | 105.1 | 114.6 | 102.7 | 0.90 | 0.75 | 0.95  | 0.87 | 0.04384144 | 1 |
| Q86WA6 | BPHL     | 3  | 90    | 130.3 | 118.1 | 110   | 69.7  | 81.9  | 0.82 | 1.87 | 1.44  | 1.38 | 0.20383055 | 1 |
| P50552 | VASP     | 23 | 124.3 | 159.6 | 162.4 | 75.7  | 40.4  | 37.6  | 1.64 | 3.95 | 4.32  | 3.30 | 0.00491122 | 1 |
| P49748 | ACADVL   | 27 | 105.2 | 98.2  | 112.8 | 94.8  | 101.8 | 87.2  | 1.11 | 0.96 | 1.29  | 1.12 | 0.14430525 | 1 |
| Q9P035 | HACD3    | 6  | 81.8  | 96.8  | 101.1 | 118.2 | 103.2 | 98.9  | 0.69 | 0.94 | 1.02  | 0.88 | 0.17721196 | 1 |
| Q53GQ0 | HSD17B12 | 14 | 52.9  | 98.8  | 55    | 147.1 | 101.2 | 145   | 0.36 | 0.98 | 0.38  | 0.57 | 0.04240911 | 1 |
| Q9NZ01 | TECR     | 5  | 113.4 | 91.7  | 104.6 | 86.6  | 108.3 | 95.4  | 1.31 | 0.85 | 1.10  | 1.08 | 0.50823355 | 1 |
| Q9Y3E0 | GOLT1B   | 4  | 128.2 | 121.4 | 116.6 | 71.8  | 78.6  | 83.4  | 1.79 | 1.54 | 1.40  | 1.58 | 0.00075204 | 1 |
| Q9UEU0 | VTI1B    | 5  | 100   | 78.4  | 76.2  | 100   | 121.6 | 123.8 | 1.00 | 0.64 | 0.62  | 0.75 | 0.04790026 | 1 |
| P63027 | VAMP2    | 2  | 122   | 123.8 | 112.8 | 78    | 76.2  | 87.2  | 1.56 | 1.62 | 1.29  | 1.49 | 0.0012573  | 1 |
| Q15836 | VAMP3    | 2  | 131.2 | 118.2 | 105.4 | 68.8  | 81.8  | 94.6  | 1.91 | 1.44 | 1.11  | 1.49 | 0.02561873 | 1 |
| Q9POL0 | VAPA     | 14 | 117.4 | 87.1  | 131.1 | 82.6  | 112.9 | 68.9  | 1.42 | 0.77 | 1.90  | 1.37 | 0.26627236 | 1 |
| P46459 | NSF      | 14 | 109.9 | 104.2 | 112.7 | 90.1  | 95.8  | 87.3  | 1.22 | 1.09 | 1.29  | 1.20 | 0.00722266 | 1 |
| O75396 | SEC22B   | 12 | 125.2 | 110   | 121.4 | 74.8  | 90    | 78.6  | 1.67 | 1.22 | 1.54  | 1.48 | 0.00428002 | 1 |
| Q12907 | LMAN2    | 19 | 122.5 | 97.9  | 131   | 77.5  | 102.1 | 69    | 1.58 | 0.96 | 1.90  | 1.48 | 0.07110216 | 1 |
| Q00341 | HDLBP    | 53 | 102.5 | 95.4  | 101.7 | 97.5  | 104.6 | 98.3  | 1.05 | 0.91 | 1.03  | 1.00 | 0.93710525 | 1 |
| P08670 | VIM      | 34 | 99.3  | 150.8 | 182.9 | 100.7 | 49.2  | 17.1  | 0.99 | 3.07 | 10.70 | 4.92 | 0.06165628 | 1 |
| Q9H0V9 | LMAN2L   | 9  | 104.1 | 90.3  | 92.8  | 95.9  | 109.7 | 107.2 | 1.09 | 0.82 | 0.87  | 0.92 | 0.22825499 | 1 |
| Q9BQB6 | VKORC1   | 1  | 100.6 | 103.4 | 116   | 99.4  | 96.6  | 84    | 1.01 | 1.07 | 1.38  | 1.15 | 0.11736133 | 1 |
| Q8N0U8 | VKORC1L  | 2  | 21.1  | 97.9  | 96    | 178.9 | 102.1 | 104   | 0.12 | 0.96 | 0.92  | 0.67 | 0.18826931 | 1 |
| P21796 | VDAC1    | 20 | 84.8  | 60    | 87.7  | 115.2 | 140   | 112.3 | 0.74 | 0.43 | 0.78  | 0.65 | 0.02235683 | 1 |
| P45880 | VDAC2    | 15 | 111.9 | 74.7  | 117.6 | 88.1  | 125.3 | 82.4  | 1.27 | 0.60 | 1.43  | 1.10 | 0.89010058 | 1 |
| Q9Y277 | VDAC3    | 13 | 79.3  | 54.5  | 85.1  | 120.7 | 145.5 | 114.9 | 0.66 | 0.37 | 0.74  | 0.59 | 0.01517186 | 1 |
| P54289 | CACNA2E  | 9  | 64    | 54.1  | 74.2  | 136   | 145.9 | 125.8 | 0.47 | 0.37 | 0.59  | 0.48 | 0.00094036 | 1 |
| P27449 | ATP6V0C  | 1  | 100.9 | 99.1  | 71    | 99.1  | 100.9 | 129   | 1.02 | 0.98 | 0.55  | 0.85 | 0.23075518 | 1 |
| P38606 | ATP6V1A  | 25 | 109.4 | 97.5  | 108.9 | 90.6  | 102.5 | 91.1  | 1.21 | 0.95 | 1.20  | 1.12 | 0.12776107 | 1 |
| P36543 | ATP6V1E1 | 12 | 96.4  | 95    | 126.4 | 103.6 | 105   | 73.6  | 0.93 | 0.90 | 1.72  | 1.18 | 0.45860771 | 1 |
| O75348 | ATP6V1G  | 2  | 98.8  | 134.1 | 76.2  | 101.2 | 65.9  | 123.8 | 0.98 | 2.03 | 0.62  | 1.21 | 0.81157118 | 1 |
| Q9Y4E1 | WASHC2C  | 10 | 45.4  | 73.3  | 86.5  | 154.6 | 126.7 | 113.5 | 0.29 | 0.58 | 0.76  | 0.54 | 0.02104112 | 1 |
| Q9Y3C0 | WASHC3   | 1  | 68.4  | 91.6  | 89.7  | 131.6 | 108.4 | 110.3 | 0.52 | 0.85 | 0.81  | 0.73 | 0.03326799 | 1 |
| Q12768 | WASHC5   | 3  | 124.3 | 111.8 | 90.5  | 75.7  | 88.2  | 109.5 | 1.64 | 1.27 | 0.83  | 1.25 | 0.2726594  | 1 |
| Q5JSH3 | WDR44    | 8  | 139   | 144.8 | 159.2 | 61    | 55.2  | 40.8  | 2.28 | 2.62 | 3.90  | 2.93 | 0.00035859 | 1 |
| Q9GZS3 | WDR61    | 10 | 73    | 104.3 | 91.2  | 127   | 95.7  | 108.8 | 0.57 | 1.09 | 0.84  | 0.83 | 0.1771377  | 1 |
| Q6UXN9 | WDR82    | 8  | 92.2  | 158.9 | 102.2 | 107.8 | 41.1  | 97.8  | 0.86 | 3.87 | 1.04  | 1.92 | 0.29295551 | 1 |
| Q9Y2W2 | WBP11    | 10 | 129.7 | 151   | 142.2 | 70.3  | 49    | 57.8  | 1.84 | 3.08 | 2.46  | 2.46 | 0.00072107 | 1 |
| Q969T9 | WBP2     | 8  | 86.9  | 91.7  | 105.6 | 113.1 | 108.3 | 94.4  | 0.77 | 0.85 | 1.12  | 0.91 | 0.25479276 | 1 |
| Q9BTA9 | WAC      | 1  | 103.4 | 124.5 | 84.6  | 96.6  | 75.5  | 115.4 | 1.07 | 1.65 | 0.73  | 1.15 | 0.63606716 | 1 |
| P12955 | PEPD     | 19 | 124.1 | 106.3 | 115.5 | 75.9  | 93.7  | 84.5  | 1.64 | 1.13 | 1.37  | 1.38 | 0.01358483 | 1 |



|        |         |    |       |       |       |       |      |       |       |      |       |      |            |   |
|--------|---------|----|-------|-------|-------|-------|------|-------|-------|------|-------|------|------------|---|
| P13010 | XRCC5   | 32 | 125.4 | 116.7 | 124.9 | 74.6  | 83.3 | 75.1  | 1.68  | 1.40 | 1.66  | 1.58 | 0.00036204 | 1 |
| P12956 | XRCC6   | 32 | 128.5 | 120.8 | 129.3 | 71.5  | 79.2 | 70.7  | 1.80  | 1.53 | 1.83  | 1.72 | 0.00016571 | 1 |
| Q86U90 | YRDC    | 5  | 154.9 | 148.1 | 184.7 | 45.1  | 51.9 | 15.3  | 3.43  | 2.85 | 12.07 | 6.12 | 0.00140723 | 1 |
| Q9Y5A9 | YTHDF2  | 5  | 96.1  | 136.7 | 149.9 | 103.9 | 63.3 | 50.1  | 0.92  | 2.16 | 2.99  | 2.03 | 0.07369473 | 1 |
| Q7Z739 | YTHDF3  | 7  | 130.1 | 162.2 | 129.5 | 69.9  | 37.8 | 70.5  | 1.86  | 4.29 | 1.84  | 2.66 | 0.00602295 | 1 |
| Q5T200 | ZC3H13  | 5  | 189.1 | 178.1 | 149.3 | 10.9  | 21.9 | 50.7  | 17.35 | 8.13 | 2.94  | 9.48 | 0.0010042  | 1 |
| Q8WU90 | ZC3H15  | 5  | 124.7 | 129.3 | 120.3 | 75.3  | 70.7 | 79.7  | 1.66  | 1.83 | 1.51  | 1.66 | 0.00017523 | 1 |
| Q9UPT8 | ZC3H4   | 12 | 105.7 | 106   | 111.3 | 94.3  | 94   | 88.7  | 1.12  | 1.13 | 1.25  | 1.17 | 0.00397525 | 1 |
| Q7Z2W4 | ZC3HAV1 | 18 | 123   | 108.7 | 106.9 | 77    | 91.3 | 93.1  | 1.60  | 1.19 | 1.15  | 1.31 | 0.02332103 | 1 |
| Q6NZY4 | ZCCHC8  | 4  | 172.9 | 145   | 163   | 27.1  | 55   | 37    | 6.38  | 2.64 | 4.41  | 4.47 | 0.00047517 | 1 |
| Q14966 | ZNF638  | 7  | 101   | 171.8 | 85.6  | 99    | 28.2 | 114.4 | 1.02  | 6.09 | 0.75  | 2.62 | 0.35820921 | 1 |
| Q8NEW0 | SLC30A7 | 1  | 132.1 | 132.4 | 176.8 | 67.9  | 67.6 | 23.2  | 1.95  | 1.96 | 7.62  | 3.84 | 0.0109443  | 1 |

**Supplementary Table. S2 Differentially expressed proteins regulated by MEST overexpression**

| Uniprot IDs | Gene name | Protein name                                                              | Fold Change |
|-------------|-----------|---------------------------------------------------------------------------|-------------|
| O00291      | HIP1      | Huntingtin-interacting protein 1                                          | 35.54       |
| Q92736      | RYR2      | Ryanodine receptor 2                                                      | 6.03        |
| P09913      | IFIT2     | Interferon-induced protein with tetratricopeptide repeats 2               | 4.35        |
| O14879      | IFIT3     | Interferon-induced protein with tetratricopeptide repeats 3               | 3.66        |
| Q96BM9      | ARL8A     | ADP-ribosylation factor-like protein 8A                                   | 3.65        |
| Q7Z7A1      | CNTRL     | Centriolin                                                                | 3.57        |
| P20591      | MX1       | Interferon-induced GTP-binding protein Mx1                                | 3.52        |
| P09914      | IFIT1     | Interferon-induced protein with tetratricopeptide repeats 1               | 3.49        |
| Q9C002      | NMES1     | Normal mucosa of esophagus-specific gene 1 protein                        | 3.45        |
| Q96JH7      | VCPIP1    | Deubiquitinating protein VCIP135                                          | 3.37        |
| P55957      | BID       | BH3-interacting domain death agonist                                      | 3.30        |
| P49750      | YLPM1     | YLP motif-containing protein 1                                            | 2.85        |
| P13164      | IFITM1    | Interferon-induced transmembrane protein 1                                | 2.63        |
| Q9Y586      | MAB21L2   | Protein mab-21-like 2                                                     | 2.56        |
| P09417      | QDPR      | Dihydropteridine reductase                                                | 2.54        |
| A4D1E9      | GTPBP10   | GTP-binding protein 10                                                    | 2.44        |
| Q96E11      | MRRF      | Ribosome-recycling factor, mitochondrial                                  | 2.44        |
| Q9H0P0      | NT5C3A    | Cytosolic 5                                                               | 2.12        |
| Q8WXH0      | SYNE2     | Nesprin-2                                                                 | 2.09        |
| P05161      | ISG15     | Ubiquitin-like protein ISG15                                              | 2.03        |
| Q9H8S9      | MOB1A     | MOB kinase activator 1A                                                   | 1.99        |
| P29992      | GNA11     | Guanine nucleotide-binding protein subunit alpha-11                       | 1.92        |
| P16188      | HLA-A     | HLA class I histocompatibility antigen, A-30 alpha chain                  | 1.91        |
| Q96AZ6      | ISG20     | Interferon-stimulated gene 20 kDa protein                                 | 1.90        |
| P23381      | WARS      | Tryptophan--tRNA ligase, cytoplasmic                                      | 1.88        |
| Q9H7L9      | SUDS3     | Sin3 histone deacetylase corepressor complex component SDS3               | 1.86        |
| Q03519      | TAP2      | Antigen peptide transporter 2                                             | 1.85        |
| O95786      | DDX58     | Probable ATP-dependent RNA helicase DDX58                                 | 1.74        |
| Q14146      | URB2      | Unhealthy ribosome biogenesis protein 2 homolog                           | 1.71        |
| P04179      | SOD2      | Superoxide dismutase [Mn], mitochondrial                                  | 1.71        |
| P42224      | STAT1     | Signal transducer and activator of transcription 1-alpha/beta             | 1.71        |
| Q9BQE5      | APOL2     | Apolipoprotein L2                                                         | 1.68        |
| P30453      | HLA-A     | HLA class I histocompatibility antigen, A-34 alpha chain                  | 1.67        |
| Q63HN8      | RNF213    | E3 ubiquitin-protein ligase RNF213                                        | 1.65        |
| P28838      | LAP3      | Cytosol aminopeptidase                                                    | 1.63        |
| Q9Y6K5      | OAS3      | 2'-5'-oligoadenylate synthase 3                                           | 1.60        |
| P28907      | CD38      | ADP-ribosyl cyclase/cyclic ADP-ribose hydrolase 1                         | 1.59        |
| Q92620      | DHX38     | Pre-mRNA-splicing factor ATP-dependent RNA helicase PRP16                 | 1.56        |
| Q9BYX4      | IFIH1     | Interferon-induced helicase C domain-containing protein 1                 | 1.55        |
| P35354      | PTGS2     | Prostaglandin G/H synthase 2                                              | 1.55        |
| P19784      | CSNK2A2   | Casein kinase II subunit alpha                                            | 1.53        |
| Q9UII4      | HERC5     | E3 ISG15--protein ligase HERC5                                            | 1.53        |
| P02792      | FTL       | Ferritin light chain                                                      | 1.53        |
| Q03518      | TAP1      | Antigen peptide transporter 1                                             | 1.51        |
| Q14669      | TRIP12    | E3 ubiquitin-protein ligase TRIP12                                        | 1.51        |
| Q8TDB6      | DTX3L     | E3 ubiquitin-protein ligase DTX3L                                         | 1.49        |
| Q70UQ0      | IKBIP     | Inhibitor of nuclear factor kappa-B kinase-interacting protein            | 1.49        |
| O76071      | CIAO1     | Probable cytosolic iron-sulfur protein assembly protein CIAO1             | 1.48        |
| Q9NZT2      | OGFR      | Opioid growth factor receptor                                             | 1.47        |
| P62745      | RHOB      | Rho-related GTP-binding protein RhoB                                      | 1.47        |
| P21980      | TGM2      | Protein-glutamine gamma-glutamyltransferase 2                             | 1.47        |
| Q9UMX5      | NENF      | Neudesin                                                                  | 1.47        |
| O75608      | LYPLA1    | Acyl-protein thioesterase 1                                               | 1.47        |
| P50453      | SERPINB9  | Serpin B9                                                                 | 1.47        |
| P40305      | IFI27     | Interferon alpha-inducible protein 27, mitochondrial                      | 1.46        |
| Q8TAT6      | NPLOC4    | Nuclear protein localization protein 4 homolog                            | 1.45        |
| P48307      | TFPI2     | Tissue factor pathway inhibitor 2                                         | 1.45        |
| P30508      | HLA-C     | HLA class I histocompatibility antigen, Cw-12 alpha chain                 | 1.44        |
| Q15646      | OASL      | 2'-5'-oligoadenylate synthase-like protein                                | 1.43        |
| Q9H223      | EHD4      | EH domain-containing protein 4                                            | 1.43        |
| Q16740      | CLPP      | ATP-dependent Clp protease proteolytic subunit, mitochondrial             | 1.41        |
| P09543      | CNP       | 2',3'-cyclic-nucleotide 3'-phosphodiesterase (CNP) (CNPase) (EC 3.1.4.37) | 1.40        |
| Q9Y3C6      | PP1L1     | Peptidyl-prolyl cis-trans isomerase-like 1                                | 1.40        |

|        |           |                                                                    |      |
|--------|-----------|--------------------------------------------------------------------|------|
| P05231 | IL6       | Interleukin-6                                                      | 1.39 |
| Q9NQW7 | XPNPEP1   | Xaa-Pro aminopeptidase 1                                           | 1.38 |
| Q6F181 | CIAPIN1   | Anamorsin                                                          | 1.38 |
| Q9NV11 | FANCI     | Fanconi anemia group I protein                                     | 1.38 |
| Q8TCS8 | PNPT1     | Polyribonucleotide nucleotidyltransferase 1, mitochondrial         | 1.38 |
| Q01628 | IFITM3    | Interferon-induced transmembrane protein 3                         | 1.37 |
| P62256 | UBE2H     | Ubiquitin-conjugating enzyme E2 H                                  | 1.37 |
| P00973 | OAS1      | 2'-5'-oligoadenylate synthase 1                                    | 1.36 |
| Q9BZL6 | PRKD2     | Serine/threonine-protein kinase D2                                 | 1.35 |
| Q8WVX9 | FAR1      | Fatty acyl-CoA reductase 1                                         | 1.35 |
| O60287 | URB1      | Nucleolar pre-ribosomal-associated protein 1                       | 1.34 |
| O15155 | BET1      | BET1 homolog                                                       | 1.33 |
| P62633 | CNBP      | Cellular nucleic acid-binding protein                              | 1.33 |
| P40763 | STAT3     | Signal transducer and activator of transcription 3                 | 1.32 |
| P26885 | FKBP2     | Peptidyl-prolyl cis-trans isomerase FKBP2                          | 1.32 |
| Q16352 | INA       | Alpha-internexin                                                   | 1.32 |
| Q15121 | PEA15     | Astrocytic phosphoprotein PEA-15                                   | 1.32 |
| Q9NUQ6 | SPATS2L   | SPATS2-like protein                                                | 1.32 |
| Q09028 | RBBP4     | Histone-binding protein RBBP4                                      | 1.31 |
| P07305 | H1F0      | Histone H1.0                                                       | 1.31 |
| P19525 | EIF2AK2   | Interferon-induced, double-stranded RNA-activated protein kinase   | 1.31 |
| Q9P2R3 | ANKFY1    | Rabankyrin-5                                                       | 1.31 |
| Q95758 | PTBP3     | Polypyrimidine tract-binding protein 3                             | 1.30 |
| O75431 | MTX2      | Metaxin-2                                                          | 0.77 |
| Q9Y5X3 | SNX5      | Sorting nexin-5                                                    | 0.77 |
| P17612 | PRKACA    | cAMP-dependent protein kinase catalytic subunit alpha              | 0.77 |
| Q5T6F2 | UBAP2     | Ubiquitin-associated protein 2                                     | 0.76 |
| Q99595 | TIMM17A   | Mitochondrial import inner membrane translocase subunit Tim17-A    | 0.76 |
| O43633 | CHMP2A    | Charged multivesicular body protein 2a                             | 0.76 |
| Q9UG63 | ABCF2     | ATP-binding cassette sub-family F member 2                         | 0.75 |
| Q969G6 | RFK       | Riboflavin kinase                                                  | 0.75 |
| P16949 | STMN1     | Stathmin                                                           | 0.74 |
| Q9NXP7 | GIN1      | Gypsy retrotransposon integrase-like protein 1                     | 0.74 |
| Q14498 | RBM39     | RNA-binding protein 39                                             | 0.74 |
| Q9NWU5 | MRPL22    | 39S ribosomal protein L22, mitochondrial                           | 0.73 |
| P15927 | RPA2      | Replication protein A 32 kDa subunit                               | 0.73 |
| Q86XA9 | HEATR5A   | HEAT repeat-containing protein 5A                                  | 0.72 |
| Q6UX53 | METTL7B   | Methyltransferase-like protein 7B                                  | 0.70 |
| Q3LXA3 | TKFC      | Triokinase/FMN cyclase                                             | 0.70 |
| P83111 | LACTB     | Serine beta-lactamase-like protein LACTB, mitochondrial            | 0.70 |
| P61011 | SRP54     | Signal recognition particle 54 kDa protein                         | 0.70 |
| Q13907 | IDI1      | Isopentenyl-diphosphate Delta-isomerase 1                          | 0.70 |
| P55263 | ADK       | Adenosine kinase                                                   | 0.69 |
| Q00535 | CDK5      | Cyclin-dependent-like kinase 5                                     | 0.68 |
| Q9UBI6 | GNG12     | Guanine nucleotide-binding protein G(I)/G(S)/G(O) subunit gamma-12 | 0.67 |
| Q5TFE4 | NT5DC1    | 5'-nucleotidase domain-containing protein 1 (EC 3.1.3.-)           | 0.67 |
| P31937 | HIBADH    | 3-hydroxyisobutyrate dehydrogenase, mitochondrial                  | 0.67 |
| P28072 | PSMB6     | Proteasome subunit beta type-6                                     | 0.67 |
| P55011 | SLC12A2   | Solute carrier family 12 member 2                                  | 0.66 |
| Q8N4V1 | MMGT1     | Membrane magnesium transporter 1                                   | 0.65 |
| Q9BW30 | TPPP3     | Tubulin polymerization-promoting protein family member 3           | 0.65 |
| P61769 | B2M       | Beta-2-microglobulin                                               | 0.65 |
| O00566 | MPHOSPH10 | U3 small nucleolar ribonucleoprotein protein MPP10                 | 0.52 |
| P27216 | ANXA13    | Annexin A13                                                        | 0.52 |
| Q8N3U4 | STAG2     | Cohesin subunit SA-2                                               | 0.51 |
| Q8TE73 | DNAH5     | Dynein heavy chain 5, axonemal                                     | 0.48 |
| Q9Y4I1 | MYO5A     | Unconventional myosin-Va                                           | 0.44 |
| Q9UN52 | COPS3     | COP9 signalosome complex subunit 3                                 | 0.23 |
| Q96HU8 | DIRAS2    | GTP-binding protein Di-Ras2                                        | 0.22 |
| O76041 | NEBL      | Nebulette                                                          | 0.08 |
| P52306 | RAP1GDS1  | Rap1 GTPase-GDP dissociation stimulator 1                          | 0.08 |
| Q6NUN7 | C11orf63  | Uncharacterized protein C11orf63                                   | 0.07 |
| Q9ULC6 | PADI1     | Protein-arginine deiminase type-1                                  | 0.01 |
| Q16512 | PKN1      | Serine/threonine-protein kinase N1                                 | 0.01 |

**Supplementary Table. S3 Potential MEST binding proteins identified by co-immunoprecipitation MS.**

| <b>Uniprot IDs</b> | <b>Gene symbol</b> | <b>Protein name</b>                                      | <b>Mol. weight [kDa]</b> | <b>pI</b> |
|--------------------|--------------------|----------------------------------------------------------|--------------------------|-----------|
| P55072             | VCP                | Transitional endoplasmic reticulum ATPase                | 89.32                    | 4.89      |
| P05141             | SLC25A5            | ADP/ATP translocase 2                                    | 32.85                    | 10.18     |
| Q13151             | HNRNPA0            | Heterogeneous nuclear ribonucleoprotein A0               | 30.84                    | 9.66      |
| P62913             | RPL11              | 60S ribosomal protein L11                                | 20.25                    | 10.14     |
| Q9BRZ2             | TRIM56             | E3 ubiquitin-protein ligase TRIM56                       | 81.49                    | 7.78      |
| Q9UBS4             | DNAJB11            | DnaJ homolog subfamily B member 11                       | 40.51                    | 6.07      |
| P67809             | YBX1               | Nuclease-sensitive element-binding protein 1             | 35.92                    | 10.31     |
| Q00325             | SLC25A3            | Phosphate carrier protein, mitochondrial                 | 40.09                    | 9.79      |
| Q13459             | MYO9B              | Unconventional myosin-Ixb                                | 243.40                   | 9.06      |
| Q9Y2W1             | THRAP3             | Thyroid hormone receptor-associated protein 3            | 108.66                   | 10.82     |
| Q9Y2P8             | RCL1               | RNA 3'-terminal phosphate cyclase-like protein           | 40.84                    | 9.67      |
| Q9P035             | PTPLAD1            | Very-long-chain (3R)-3-hydroxyacyl-CoA dehydratase 3     | 43.16                    | 9.25      |
| Q8N3C0             | ASCC3              | Activating signal cointegrator 1 complex subunit 3       | 251.46                   | 7.10      |
| P55786             | NPEPPS             | Puromycin-sensitive aminopeptidase                       | 103.28                   | 5.44      |
| P09661             | SNRPA1             | U2 small nuclear ribonucleoprotein A                     | 28.42                    | 9.00      |
| O75688             | PPM1B              | Protein phosphatase 1B                                   | 52.64                    | 4.69      |
| P53007             | SLC25A1            | Tricarboxylate transport protein, mitochondrial          | 34.01                    | 10.44     |
| P35579             | MYH9               | Myosin-9                                                 | 226.53                   | 5.29      |
| Q15149             | PLEC               | Plectin                                                  | 531.79                   | 5.76      |
| Q14204             | DYNC1H1            | Cytoplasmic dynein 1 heavy chain 1                       | 532.40                   | 6.34      |
| Q7Z3U7             | MON2               | Protein MON2 homolog                                     | 190.36                   | 5.95      |
| Q92945             | KHSRP              | Far upstream element-binding protein 2                   | 73.12                    | 7.34      |
| Q13148             | TARDBP             | TAR DNA-binding protein 43                               | 44.74                    | 6.07      |
| Q06265             | EXOSC9             | Exosome complex component RRP45                          | 48.95                    | 4.93      |
| Q7Z2W4             | ZC3HAV1            | Zinc finger CCCH-type antiviral protein 1                | 101.43                   | 8.47      |
| P25205             | MCM3               | DNA replication licensing factor MCM3                    | 90.98                    | 5.48      |
| Q9UII4             | HERC5              | E3 ISG15--protein ligase HERC5                           | 116.85                   | 7.70      |
| Q96QR8             | PURB               | Transcriptional activator protein Pur-beta               | 33.24                    | 5.06      |
| P35580             | MYH10              | Myosin-10                                                | 229.00                   | 5.22      |
| Q9BUJ2             | HNRNPUL1           | Heterogeneous nuclear ribonucleoprotein U-like protein 1 | 95.74                    | 6.90      |
| Q9NXF1             | TEX10              | Testis-expressed sequence 10 protein                     | 105.67                   | 9.86      |
| P48651             | PTDSS1             | Phosphatidylserine synthase 1                            | 55.53                    | 8.52      |
